# Supplementary material
Source: Research Square preprint supplement (doi:10.21203/rs.3.rs-9243755/v1)
Supplement: Supplementary file 1 [file 55ad67cc767cbb5a32307237.xlsx]

## Sheet: Table S1
Table S1. Repeat contents in the assembling genome of Haliotis discus hannai.
Type	No. elements	Legth occupied (bp)	Percentage
Class I Retroelements	851502	138764037	7.37
SINEs:	0	0	0
Penelope:	0	0	0
LINEs:	231514	60952060	3.24
CRE/SLACS	0	0	0
L2/CR1/Rex	4655	1286860	0.07
R1/LOA/Jockey	72408	23590685	1.25
R2/R4/NeSL	18868	6772280	0.36
RTE/Bov-B	87985	17561210	0.93
L1/CIN4	314	99331	0.01
LTR elements:	619988	77811977	4.13
BEL/Pao	1293	1010337	0.05
Ty1/Copia	110	100977	0.01
Gypsy/DIRS1	61769	16848115	0.89
Retroviral	211	35425	0
Class II DNA transposons	1204367	222412064	11.81
hobo-Activator	2152	572100	0.03
Tc1-IS630-Pogo	159272	48689480	2.59
En-Spm	0	0	0
MULE-MuDR	3688	1039162	0.06
PiggyBac	0	0	0
Tourist/Harbinger	1007545	163344592	8.67
Other(Mirage, P-element, Transib)	0	0	0
Rolling-circles	16314	1581678	0.08
Unclassified:	2169397	323010100	17.15
Small RNA:	17399	2107568	0.11
Satellites:	0	0	0
Simple repeats:	312195	17903846	0.95
Low complexity:	21481	1650095	0.09
Total interspersed repeats:		684186201	36.33
Total non-interspersed repeats:		23243187	1.23
Total repeats:		707429388	37.56

## Sheet: Table S2
Table S2. Annotation results of the whole-genome predicted protein-coding genes in Haliotis discus hannai.
GeneID	TranscriptID	Feature	Contig	Start	Stop	Strand	Name	Product	Alias/Synonyms	EC_number	BUSCO	PFAM	InterPro	EggNog	COG	GO Terms	Secreted	Membrane	Protease	CAZyme	Notes
FUN_000001	FUN_000001-T1	mRNA	scaffold_1	2052	2404	+		hypothetical protein						ENOG503BKR0	S:(S) Function unknown
FUN_000003	FUN_000003-T1	mRNA	scaffold_1	12763	25581	-	VPS9D1_1	Vacuolar sorting protein 9 (VPS9) domain						ENOG503BF3I	S:(S) Function unknown
FUN_000004	FUN_000004-T1	mRNA	scaffold_1	26305	50734	+		hypothetical protein				PF02037	IPR003034 SAP domain;IPR036361 SAP domain superfamily;IPR052793 Exon junction complex-associated protein	ENOG503BVZE	B:(B) Chromatin structure and dynamics	GO_component: GO:0061574 - ASAP complex [Evidence IEA];GO_component: GO:0071011 - precatalytic spliceosome [Evidence IEA];GO_function: GO:0003723 - RNA binding [Evidence IEA];GO_process: GO:0008380 - RNA splicing [Evidence IEA]
FUN_000006	FUN_000006-T1	mRNA	scaffold_1	58849	59160	-		hypothetical protein
FUN_000007	FUN_000007-T1	mRNA	scaffold_1	59178	63615	+		hypothetical protein
FUN_000010	FUN_000010-T1	mRNA	scaffold_1	86656	148275	-	VPS9D1_2	Vacuolar sorting protein 9 (VPS9) domain			5245at6447	PF02204	IPR003123 VPS9 domain;IPR037191 VPS9 domain superfamily;IPR045046 Vacuolar protein sorting-associated protein 9-like	ENOG503CQ8C	U:(U) Intracellular trafficking, secretion, and vesicular transport	GO_component: GO:0030139 - endocytic vesicle [Evidence IEA];GO_component: GO:0005829 - cytosol [Evidence IEA];GO_function: GO:0005085 - guanyl-nucleotide exchange factor activity [Evidence IEA];GO_function: GO:0031267 - small GTPase binding [Evidence IEA];GO_process: GO:0016192 - vesicle-mediated transport [Evidence IEA]
FUN_000011	FUN_000011-T1	mRNA	scaffold_1	167883	198202	+		hypothetical protein
FUN_000012	FUN_000012-T1	mRNA	scaffold_1	199047	201412	-		hypothetical protein
FUN_000013	FUN_000013-T1	mRNA	scaffold_1	203407	212153	+	ACIN1_1	Apoptotic chromatin condensation inducer in the nucleus				PF16294	IPR032552 Acin1, RNSP1-SAP18 binding (RSB) motif;IPR034257 Acinus, RNA recognition motif;IPR052793 Exon junction complex-associated protein	ENOG503BKK6	B:(B) Chromatin structure and dynamics	GO_component: GO:0061574 - ASAP complex [Evidence IEA];GO_component: GO:0071011 - precatalytic spliceosome [Evidence IEA];GO_function: GO:0003723 - RNA binding [Evidence IEA];GO_process: GO:0008380 - RNA splicing [Evidence IEA]
FUN_000014	FUN_000014-T1	mRNA	scaffold_1	220971	224164	-	CEP89_1	cilium assembly					IPR033545 Centrosomal protein of 89kDa	ENOG503BFU6	S:(S) Function unknown	GO_component: GO:0097539 - ciliary transition fiber [Evidence IEA];GO_component: GO:0005814 - centriole [Evidence IEA];GO_process: GO:0060271 - cilium assembly [Evidence IEA];GO_process: GO:0007268 - chemical synaptic transmission [Evidence IEA];GO_process: GO:0007005 - mitochondrion organization [Evidence IEA]
FUN_000015	FUN_000015-T1	mRNA	scaffold_1	243348	296234	-	CEP89_2	cilium assembly					IPR033545 Centrosomal protein of 89kDa	ENOG503BFU6	S:(S) Function unknown	GO_component: GO:0097539 - ciliary transition fiber [Evidence IEA];GO_component: GO:0005814 - centriole [Evidence IEA];GO_process: GO:0060271 - cilium assembly [Evidence IEA];GO_process: GO:0007268 - chemical synaptic transmission [Evidence IEA];GO_process: GO:0007005 - mitochondrion organization [Evidence IEA]
FUN_000015	FUN_000015-T2	mRNA	scaffold_1	243348	296234	-	CEP89_2	cilium assembly, variant 2					IPR033545 Centrosomal protein of 89kDa	ENOG503BFU6	S:(S) Function unknown	GO_component: GO:0097539 - ciliary transition fiber [Evidence IEA];GO_component: GO:0005814 - centriole [Evidence IEA];GO_process: GO:0060271 - cilium assembly [Evidence IEA];GO_process: GO:0007268 - chemical synaptic transmission [Evidence IEA];GO_process: GO:0007005 - mitochondrion organization [Evidence IEA]
FUN_000016	FUN_000016-T1	mRNA	scaffold_1	278788	333582	+	Tep6_1	endopeptidase inhibitor activity				PF01835	IPR002890 Macroglobulin domain;IPR050473 Alpha-2-macroglobulin/Complement system	ENOG503BCF2	O:(O) Posttranslational modification, protein turnover, chaperones	GO_function: GO:0004866 - endopeptidase inhibitor activity [Evidence IEA]			I39
FUN_000017	FUN_000017-T1	mRNA	scaffold_1	333838	365660	+	Tep6_2	endopeptidase inhibitor activity			210at6447	PF00207;PF07677;PF07678;PF07703	IPR001599 Alpha-2-macroglobulin;IPR002172 Low-density lipoprotein (LDL) receptor class A repeat;IPR008930 Terpenoid cyclases/protein prenyltransferase alpha-alpha toroid;IPR009048 Alpha-macroglobulin, receptor-binding;IPR011625 Alpha-2-macroglobulin, bait region domain;IPR011626 Alpha-macroglobulin-like, TED domain;IPR013783 Immunoglobulin-like fold;IPR036055 LDL receptor-like superfamily;IPR0365…	ENOG503BCF2	O:(O) Posttranslational modification, protein turnover, chaperones	GO_component: GO:0005576 - extracellular region [Evidence IEA];GO_component: GO:0005615 - extracellular space [Evidence IEA];GO_function: GO:0005515 - protein binding [Evidence IEA];GO_function: GO:0004866 - endopeptidase inhibitor activity [Evidence IEA]			I39
FUN_000020	FUN_000020-T1	mRNA	scaffold_1	378927	434194	-		hypothetical protein				PF00023;PF12796;PF13637;PF20720	IPR002110 Ankyrin repeat;IPR027417 P-loop containing nucleoside triphosphate hydrolase;IPR036770 Ankyrin repeat-containing domain superfamily;IPR049050 Novel STAND NTPase 3	ENOG504NEYY	S:(S) Function unknown	GO_function: GO:0005515 - protein binding [Evidence IEA]
FUN_000020	FUN_000020-T2	mRNA	scaffold_1	378927	434194	-		hypothetical protein				PF00023;PF12796;PF13637;PF20720	IPR002110 Ankyrin repeat;IPR027417 P-loop containing nucleoside triphosphate hydrolase;IPR036770 Ankyrin repeat-containing domain superfamily;IPR049050 Novel STAND NTPase 3	ENOG504NEYY	S:(S) Function unknown	GO_function: GO:0005515 - protein binding [Evidence IEA]
FUN_000020	FUN_000020-T3	mRNA	scaffold_1	378927	434194	-		hypothetical protein				PF00023;PF12796;PF13637;PF20720	IPR002110 Ankyrin repeat;IPR027417 P-loop containing nucleoside triphosphate hydrolase;IPR036770 Ankyrin repeat-containing domain superfamily;IPR049050 Novel STAND NTPase 3	ENOG504NEYY	S:(S) Function unknown	GO_function: GO:0005515 - protein binding [Evidence IEA]
FUN_000023	FUN_000023-T1	mRNA	scaffold_1	464654	494405	+	ABTB1_1	Ankyrin repeat and BTB/POZ domain-containing protein 1				PF00023;PF00651;PF12796;PF13606;PF13637	IPR000210 BTB/POZ domain;IPR002110 Ankyrin repeat;IPR011333 SKP1/BTB/POZ domain superfamily;IPR036770 Ankyrin repeat-containing domain superfamily;IPR044515 Ankyrin repeat and BTB/POZ domain-containing protein 1-like	ENOG503BDK5	S:(S) Function unknown	GO_component: GO:0005737 - cytoplasm [Evidence IEA];GO_component: GO:0000151 - ubiquitin ligase complex [Evidence IEA];GO_function: GO:0005515 - protein binding [Evidence IEA]
FUN_000028	FUN_000028-T1	mRNA	scaffold_1	547470	552653	-		hypothetical protein
FUN_000032	FUN_000032-T1	mRNA	scaffold_1	580341	584158	+		hypothetical protein
FUN_000033	FUN_000033-T1	mRNA	scaffold_1	584298	584714	+		hypothetical protein
FUN_000034	FUN_000034-T1	mRNA	scaffold_1	588066	588674	+		hypothetical protein
FUN_000036	FUN_000036-T1	mRNA	scaffold_1	610169	630617	+	IRX4_1	Cinnamoyl-CoA reductase 1				PF00046;PF05920	IPR001356 Homeodomain;IPR008422 KN homeodomain;IPR009057 Homedomain-like superfamily;IPR017970 Homeobox, conserved site	ENOG503BJAP	K:(K) Transcription	GO_component: GO:0005634 - nucleus [Evidence IEA];GO_function: GO:0000981 - DNA-binding transcription factor activity, RNA polymerase II-specific [Evidence IEA];GO_function: GO:0003677 - DNA binding [Evidence IEA];GO_function: GO:0000978 - RNA polymerase II cis-regulatory region sequence-specific DNA binding [Evidence IEA];GO_process: GO:0048468 - cell development [Evidence IEA];GO_process: GO:00…
FUN_000041	FUN_000041-T1	mRNA	scaffold_1	821650	827626	+		hypothetical protein
FUN_000042	FUN_000042-T1	mRNA	scaffold_1	827652	836875	+	ACIN1_2	Apoptotic chromatin condensation inducer in the nucleus			11027at6447	PF16294	IPR000504 RNA recognition motif domain;IPR012677 Nucleotide-binding alpha-beta plait domain superfamily;IPR032552 Acin1, RNSP1-SAP18 binding (RSB) motif;IPR034257 Acinus, RNA recognition motif;IPR035979 RNA-binding domain superfamily;IPR052793 Exon junction complex-associated protein	ENOG503BKK6	B:(B) Chromatin structure and dynamics	GO_component: GO:0061574 - ASAP complex [Evidence IEA];GO_component: GO:0071011 - precatalytic spliceosome [Evidence IEA];GO_function: GO:0003723 - RNA binding [Evidence IEA];GO_function: GO:0003676 - nucleic acid binding [Evidence IEA];GO_process: GO:0008380 - RNA splicing [Evidence IEA]
FUN_000043	FUN_000043-T1	mRNA	scaffold_1	844783	846291	-	CEP89_4	cilium assembly					IPR033545 Centrosomal protein of 89kDa	ENOG503BFU6	S:(S) Function unknown	GO_component: GO:0097539 - ciliary transition fiber [Evidence IEA];GO_component: GO:0005814 - centriole [Evidence IEA];GO_process: GO:0060271 - cilium assembly [Evidence IEA];GO_process: GO:0007268 - chemical synaptic transmission [Evidence IEA];GO_process: GO:0007005 - mitochondrion organization [Evidence IEA]
FUN_000044	FUN_000044-T1	mRNA	scaffold_1	856909	866725	-	CEP89_5	Centrosomal protein					IPR033545 Centrosomal protein of 89kDa	ENOG503BFU6	S:(S) Function unknown	GO_component: GO:0097539 - ciliary transition fiber [Evidence IEA];GO_component: GO:0005814 - centriole [Evidence IEA];GO_process: GO:0060271 - cilium assembly [Evidence IEA];GO_process: GO:0007268 - chemical synaptic transmission [Evidence IEA];GO_process: GO:0007005 - mitochondrion organization [Evidence IEA]
FUN_000047	FUN_000047-T1	mRNA	scaffold_1	925097	925705	+	Nxpe5_1	Neurexophilin				PF24536		ENOG503BD34	S:(S) Function unknown
FUN_000048	FUN_000048-T1	mRNA	scaffold_1	943781	944571	+	Nxpe5_2	Neurexophilin				PF24536		ENOG503BD34	S:(S) Function unknown
FUN_000049	FUN_000049-T1	mRNA	scaffold_1	949662	956405	+	ABTB1_2	Ankyrin repeat and BTB/POZ domain-containing protein 1				PF00023;PF12796;PF13606;PF13637	IPR000210 BTB/POZ domain;IPR002110 Ankyrin repeat;IPR011333 SKP1/BTB/POZ domain superfamily;IPR036770 Ankyrin repeat-containing domain superfamily;IPR044515 Ankyrin repeat and BTB/POZ domain-containing protein 1-like	ENOG503BDK5	S:(S) Function unknown	GO_component: GO:0005737 - cytoplasm [Evidence IEA];GO_component: GO:0000151 - ubiquitin ligase complex [Evidence IEA];GO_function: GO:0005515 - protein binding [Evidence IEA]
FUN_000064	FUN_000064-T1	mRNA	scaffold_1	1187710	1229870	+	IRX5	Iroquois-class homeodomain protein IRX-5				PF00046;PF05920	IPR001356 Homeodomain;IPR008422 KN homeodomain;IPR009057 Homedomain-like superfamily;IPR017970 Homeobox, conserved site	ENOG503BF7U	K:(K) Transcription	GO_component: GO:0005634 - nucleus [Evidence IEA];GO_function: GO:0000981 - DNA-binding transcription factor activity, RNA polymerase II-specific [Evidence IEA];GO_function: GO:0003677 - DNA binding [Evidence IEA];GO_function: GO:0000978 - RNA polymerase II cis-regulatory region sequence-specific DNA binding [Evidence IEA];GO_process: GO:0048468 - cell development [Evidence IEA];GO_process: GO:00…
FUN_000066	FUN_000066-T1	mRNA	scaffold_1	1247686	1250369	-		hypothetical protein
FUN_000073	FUN_000073-T1	mRNA	scaffold_1	1351039	1367149	-	IRX4_2	Cinnamoyl-CoA reductase 1				PF00046;PF05920	IPR001356 Homeodomain;IPR008422 KN homeodomain;IPR009057 Homedomain-like superfamily;IPR017970 Homeobox, conserved site	ENOG503BJAP	K:(K) Transcription	GO_component: GO:0005634 - nucleus [Evidence IEA];GO_function: GO:0000981 - DNA-binding transcription factor activity, RNA polymerase II-specific [Evidence IEA];GO_function: GO:0003677 - DNA binding [Evidence IEA];GO_function: GO:0000978 - RNA polymerase II cis-regulatory region sequence-specific DNA binding [Evidence IEA];GO_process: GO:0048468 - cell development [Evidence IEA];GO_process: GO:00…
FUN_000074	FUN_000074-T1	mRNA	scaffold_1	1370171	1370806	-		hypothetical protein
FUN_000077	FUN_000077-T1	mRNA	scaffold_1	1402916	1404968	+		hypothetical protein					IPR026737 Golgin subfamily A member 6-like
FUN_000079	FUN_000079-T1	mRNA	scaffold_1	1430457	1438939	+		hypothetical protein
FUN_000083	FUN_000083-T1	mRNA	scaffold_1	1490101	1494194	+		hypothetical protein
FUN_000086	FUN_000086-T1	mRNA	scaffold_1	1539451	1544059	+		hypothetical protein
FUN_000090	FUN_000090-T1	mRNA	scaffold_1	1617477	1625540	-	IRX1	Irx1p				PF00046;PF05920	IPR001356 Homeodomain;IPR008422 KN homeodomain;IPR009057 Homedomain-like superfamily;IPR017970 Homeobox, conserved site	ENOG503BG9Z	K:(K) Transcription	GO_component: GO:0005634 - nucleus [Evidence IEA];GO_function: GO:0000981 - DNA-binding transcription factor activity, RNA polymerase II-specific [Evidence IEA];GO_function: GO:0003677 - DNA binding [Evidence IEA];GO_function: GO:0000978 - RNA polymerase II cis-regulatory region sequence-specific DNA binding [Evidence IEA];GO_process: GO:0048468 - cell development [Evidence IEA];GO_process: GO:00…
FUN_000091	FUN_000091-T1	mRNA	scaffold_1	1633964	1644309	-		hypothetical protein
FUN_000109	FUN_000109-T1	mRNA	scaffold_1	1805317	1810984	-	SLC6A7_1	Sodium:neurotransmitter symporter					IPR000175 Sodium:neurotransmitter symporter;IPR037272 Sodium:neurotransmitter symporter superfamily	ENOG503BE1B	T:(T) Signal transduction mechanisms	GO_component: GO:0016020 - membrane [Evidence IEA];GO_component: GO:0005886 - plasma membrane [Evidence IEA];GO_function: GO:0005283 - amino acid:sodium symporter activity [Evidence IEA];GO_process: GO:0089718 - amino acid import across plasma membrane [Evidence IEA];GO_process: GO:0071705 - nitrogen compound transport [Evidence IEA];GO_process: GO:0035725 - sodium ion transmembrane transport [Ev…
FUN_000111	FUN_000111-T1	mRNA	scaffold_1	1821174	1822367	-		hypothetical protein
FUN_000115	FUN_000115-T1	mRNA	scaffold_1	1854550	1856109	+		hypothetical protein		2.3.2.27			IPR000315 B-box-type zinc finger;IPR011042 Six-bladed beta-propeller, TolB-like;IPR047153 TRIM45/56/19-like	ENOG50KOG2177	O:(O) Posttranslational modification, protein turnover, chaperones	GO_function: GO:0061630 - ubiquitin protein ligase activity [Evidence IEA];GO_function: GO:0008270 - zinc ion binding [Evidence IEA]
FUN_000116	FUN_000116-T1	mRNA	scaffold_1	1866582	1889510	-		hypothetical protein				PF00209	IPR000175 Sodium:neurotransmitter symporter;IPR037272 Sodium:neurotransmitter symporter superfamily	ENOG503BMQD	T:(T) Signal transduction mechanisms	GO_component: GO:0016020 - membrane [Evidence IEA];GO_component: GO:0005886 - plasma membrane [Evidence IEA];GO_function: GO:0005283 - amino acid:sodium symporter activity [Evidence IEA];GO_process: GO:0089718 - amino acid import across plasma membrane [Evidence IEA];GO_process: GO:0071705 - nitrogen compound transport [Evidence IEA];GO_process: GO:0035725 - sodium ion transmembrane transport [Ev…
FUN_000119	FUN_000119-T1	mRNA	scaffold_1	1918630	1931592	+	RBM48_1	RNA-binding protein 48			8875at6447		IPR034264 RBM48, RNA recognition motif;IPR035979 RNA-binding domain superfamily;IPR039599 RNA-binding protein 48	ENOG503BKS8	S:(S) Function unknown	GO_component: GO:0005654 - nucleoplasm [Evidence IEA];GO_function: GO:0003676 - nucleic acid binding [Evidence IEA]
FUN_000120	FUN_000120-T1	mRNA	scaffold_1	1933791	1957565	-	NMT1	glycylpeptide N-tetradecanoyltransferase		2.3.1.97		PF00583;PF01233;PF02799	IPR000903 Glycylpeptide N-tetradecanoyltransferase;IPR016181 Acyl-CoA N-acyltransferase;IPR022676 Glycylpeptide N-tetradecanoyltransferase, N-terminal;IPR022677 Glycylpeptide N-tetradecanoyltransferase, C-terminal;IPR022678 Glycylpeptide N-tetradecanoyltransferase, conserved site	ENOG503BCBH	I:(I) Lipid transport and metabolism	GO_component: GO:0005737 - cytoplasm [Evidence IEA];GO_function: GO:0004379 - glycylpeptide N-tetradecanoyltransferase activity [Evidence IEA];GO_process: GO:0006499 - N-terminal protein myristoylation [Evidence IEA];GO_process: GO:0018008 - N-terminal peptidyl-glycine N-myristoylation [Evidence IEA]
FUN_000121	FUN_000121-T1	mRNA	scaffold_1	1957770	1966165	+	EFCAB1_1	EF-hand calcium-binding domain-containing protein 1				PF13202;PF13405;PF13499	IPR002048 EF-hand domain;IPR011992 EF-hand domain pair;IPR018247 EF-Hand 1, calcium-binding site;IPR028846 Recoverin family	ENOG503BERG	T:(T) Signal transduction mechanisms	GO_function: GO:0005509 - calcium ion binding [Evidence IEA]
FUN_000122	FUN_000122-T1	mRNA	scaffold_1	1970671	1984156	-	ADAM22_1	Disintegrin and metalloproteinase domain-containing protein 22				PF00200;PF08516;PF23106	IPR000742 EGF-like domain;IPR001762 Disintegrin domain;IPR006586 ADAM, cysteine-rich domain;IPR018358 Disintegrin, conserved site;IPR036436 Disintegrin domain superfamily	ENOG503B9I0	O:(O) Posttranslational modification, protein turnover, chaperones
FUN_000123	FUN_000123-T1	mRNA	scaffold_1	1988807	2081300	-	ADAM22_2	Disintegrin and metalloproteinase domain-containing protein 22				PF01562	IPR002870 Peptidase M12B, propeptide	ENOG503B9I0	O:(O) Posttranslational modification, protein turnover, chaperones	GO_process: GO:0006509 - membrane protein ectodomain proteolysis [Evidence IEA]
FUN_000124	FUN_000124-T1	mRNA	scaffold_1	2087405	2088068	+		hypothetical protein
FUN_000125	FUN_000125-T1	mRNA	scaffold_1	2088366	2088719	+		hypothetical protein
FUN_000126	FUN_000126-T1	mRNA	scaffold_1	2092453	2092798	+		hypothetical protein
FUN_000127	FUN_000127-T1	mRNA	scaffold_1	2092824	2093633	+		hypothetical protein
FUN_000128	FUN_000128-T1	mRNA	scaffold_1	2093968	2094287	+		hypothetical protein
FUN_000129	FUN_000129-T1	mRNA	scaffold_1	2094394	2094759	+		hypothetical protein
FUN_000130	FUN_000130-T1	mRNA	scaffold_1	2095203	2096105	+		hypothetical protein
FUN_000131	FUN_000131-T1	mRNA	scaffold_1	2096414	2097042	+		hypothetical protein
FUN_000132	FUN_000132-T1	mRNA	scaffold_1	2097070	2097503	+		hypothetical protein
FUN_000133	FUN_000133-T1	mRNA	scaffold_1	2097520	2098874	+		hypothetical protein
FUN_000134	FUN_000134-T1	mRNA	scaffold_1	2098905	2099172	+		hypothetical protein
FUN_000135	FUN_000135-T1	mRNA	scaffold_1	2099354	2099746	+		hypothetical protein
FUN_000136	FUN_000136-T1	mRNA	scaffold_1	2116408	2117661	+		hypothetical protein
FUN_000137	FUN_000137-T1	mRNA	scaffold_1	2143117	2143687	-		hypothetical protein
FUN_094525	FUN_094525-T1	mRNA	scaffold_1	2152097	2156030	+		hypothetical protein		2.3.2.27		PF22586	IPR000315 B-box-type zinc finger;IPR011011 Zinc finger, FYVE/PHD-type;IPR011042 Six-bladed beta-propeller, TolB-like;IPR047153 TRIM45/56/19-like	ENOG50KOG2177	O:(O) Posttranslational modification, protein turnover, chaperones	GO_component: GO:0005654 - nucleoplasm [Evidence IEA];GO_function: GO:0061630 - ubiquitin protein ligase activity [Evidence IEA];GO_function: GO:0008270 - zinc ion binding [Evidence IEA];GO_process: GO:0045087 - innate immune response [Evidence IEA];GO_process: GO:0060340 - positive regulation of type I interferon-mediated signaling pathway [Evidence IEA]
FUN_094525	FUN_094525-T2	mRNA	scaffold_1	2152097	2156030	+		hypothetical protein		2.3.2.27			IPR000315 B-box-type zinc finger;IPR011042 Six-bladed beta-propeller, TolB-like;IPR050952 Tripartite Motif and NHL Repeat Containing E3 Ligases	ENOG50KOG2177	O:(O) Posttranslational modification, protein turnover, chaperones	GO_function: GO:0061630 - ubiquitin protein ligase activity [Evidence IEA];GO_function: GO:0008270 - zinc ion binding [Evidence IEA];GO_process: GO:0000209 - protein polyubiquitination [Evidence IEA];GO_process: GO:0043161 - proteasome-mediated ubiquitin-dependent protein catabolic process [Evidence IEA]
FUN_000138	FUN_000138-T1	mRNA	scaffold_1	2166278	2172951	-		hypothetical protein					IPR000175 Sodium:neurotransmitter symporter;IPR037272 Sodium:neurotransmitter symporter superfamily	ENOG503BZ7E	T:(T) Signal transduction mechanisms	GO_component: GO:0016020 - membrane [Evidence IEA];GO_component: GO:0005886 - plasma membrane [Evidence IEA];GO_function: GO:0005283 - amino acid:sodium symporter activity [Evidence IEA];GO_process: GO:0089718 - amino acid import across plasma membrane [Evidence IEA];GO_process: GO:0071705 - nitrogen compound transport [Evidence IEA];GO_process: GO:0035725 - sodium ion transmembrane transport [Ev…
FUN_000139	FUN_000139-T1	mRNA	scaffold_1	2179865	2183684	-	SLC6A9_1	Sodium- and chloride-dependent glycine transporter 1					IPR000175 Sodium:neurotransmitter symporter;IPR037272 Sodium:neurotransmitter symporter superfamily	ENOG50KOG3660	U:(U) Intracellular trafficking, secretion, and vesicular transport	GO_component: GO:0016020 - membrane [Evidence IEA];GO_component: GO:0005886 - plasma membrane [Evidence IEA];GO_function: GO:0005283 - amino acid:sodium symporter activity [Evidence IEA];GO_process: GO:0089718 - amino acid import across plasma membrane [Evidence IEA];GO_process: GO:0071705 - nitrogen compound transport [Evidence IEA];GO_process: GO:0035725 - sodium ion transmembrane transport [Ev…
FUN_000140	FUN_000140-T1	mRNA	scaffold_1	2195561	2196122	-		hypothetical protein					IPR000175 Sodium:neurotransmitter symporter;IPR037272 Sodium:neurotransmitter symporter superfamily	ENOG503BMQ1	T:(T) Signal transduction mechanisms	GO_component: GO:0016020 - membrane [Evidence IEA]
FUN_000143	FUN_000143-T1	mRNA	scaffold_1	2213448	2222383	+		hypothetical protein		2.3.2.13		PF00868;PF01841	IPR001102 Transglutaminase, N-terminal;IPR002931 Transglutaminase-like;IPR013783 Immunoglobulin-like fold;IPR014756 Immunoglobulin E-set;IPR036985 Transglutaminase-like superfamily;IPR038765 Papain-like cysteine peptidase superfamily;IPR050779 Protein-glutamine gamma-glutamyltransferases	ENOG503B9AA	S:(S) Function unknown	GO_function: GO:0003810 - protein-glutamine gamma-glutamyltransferase activity [Evidence IEA];GO_process: GO:0018149 - peptide cross-linking [Evidence IEA]			C111
FUN_000144	FUN_000144-T1	mRNA	scaffold_1	2223294	2232869	+	TGM3_1	external encapsulating structure organization		2.3.2.13			IPR013783 Immunoglobulin-like fold;IPR036238 Transglutaminase, C-terminal domain superfamily;IPR036985 Transglutaminase-like superfamily;IPR038765 Papain-like cysteine peptidase superfamily;IPR050779 Protein-glutamine gamma-glutamyltransferases	ENOG503BJ8W	S:(S) Function unknown	GO_function: GO:0003810 - protein-glutamine gamma-glutamyltransferase activity [Evidence IEA];GO_process: GO:0018149 - peptide cross-linking [Evidence IEA]			C111
FUN_000145	FUN_000145-T1	mRNA	scaffold_1	2241687	2252816	-	TOX3_1	TOX high mobility group box member 3			9138at6447	PF00505;PF09011	IPR009071 High mobility group box domain;IPR036910 High mobility group box domain superfamily;IPR051365 TOX high mobility group box domain-containing protein	ENOG503BI3N	K:(K) Transcription	GO_component: GO:0005634 - nucleus [Evidence IEA];GO_function: GO:0031490 - chromatin DNA binding [Evidence IEA];GO_process: GO:0006357 - regulation of transcription by RNA polymerase II [Evidence IEA]
FUN_000146	FUN_000146-T1	mRNA	scaffold_1	2256477	2257959	-	TOX3_2	TOX high mobility group box member 3					IPR051365 TOX high mobility group box domain-containing protein	ENOG503BI3N	K:(K) Transcription	GO_component: GO:0005634 - nucleus [Evidence IEA];GO_function: GO:0031490 - chromatin DNA binding [Evidence IEA];GO_process: GO:0006357 - regulation of transcription by RNA polymerase II [Evidence IEA]
FUN_000147	FUN_000147-T1	mRNA	scaffold_1	2260030	2267444	+		hypothetical protein
FUN_000150	FUN_000150-T1	mRNA	scaffold_1	2347541	2348962	+		hypothetical protein
FUN_000151	FUN_000151-T1	mRNA	scaffold_1	2349582	2349980	-		hypothetical protein
FUN_000152	FUN_000152-T1	mRNA	scaffold_1	2377042	2378046	+		hypothetical protein
FUN_000153	FUN_000153-T1	mRNA	scaffold_1	2386630	2402435	+		hypothetical protein
FUN_000155	FUN_000155-T1	mRNA	scaffold_1	2433807	2442174	-	TOX3_3	TOX high mobility group box member 3				PF00505;PF09011	IPR009071 High mobility group box domain;IPR036910 High mobility group box domain superfamily;IPR051365 TOX high mobility group box domain-containing protein	ENOG503BI3N	K:(K) Transcription	GO_component: GO:0005634 - nucleus [Evidence IEA];GO_function: GO:0031490 - chromatin DNA binding [Evidence IEA];GO_process: GO:0006357 - regulation of transcription by RNA polymerase II [Evidence IEA]
FUN_000160	FUN_000160-T1	mRNA	scaffold_1	2495163	2504631	+		hypothetical protein
FUN_000161	FUN_000161-T1	mRNA	scaffold_1	2506115	2513320	+		hypothetical protein
FUN_000162	FUN_000162-T1	mRNA	scaffold_1	2513633	2514461	+		hypothetical protein
FUN_000163	FUN_000163-T1	mRNA	scaffold_1	2554787	2558706	+		hypothetical protein
FUN_000164	FUN_000164-T1	mRNA	scaffold_1	2558723	2574499	+		hypothetical protein				PF00096;PF23611	IPR013087 Zinc finger C2H2-type;IPR036236 Zinc finger C2H2 superfamily;IPR050688 Zinc finger and ubiquitin peptidase domain-containing protein;IPR056438 CTCF-like, C2H2 zinc finger	ENOG503BEBI	S:(S) Function unknown	GO_component: GO:0005634 - nucleus [Evidence IEA];GO_process: GO:0045944 - positive regulation of transcription by RNA polymerase II [Evidence IEA];GO_process: GO:0010468 - regulation of gene expression [Evidence IEA]
FUN_000165	FUN_000165-T1	mRNA	scaffold_1	2574739	2666362	+		hypothetical protein					IPR017452 GPCR, rhodopsin-like, 7TM;IPR052954 GPCR_Ligand_Interaction	ENOG503BN82	S:(S) Function unknown	GO_component: GO:0016020 - membrane [Evidence IEA]
FUN_000167	FUN_000167-T1	mRNA	scaffold_1	2698604	2701633	+		hypothetical protein
FUN_000168	FUN_000168-T1	mRNA	scaffold_1	2706579	2960671	-		hypothetical protein			720at6447	PF02985	IPR000357 HEAT repeat;IPR011989 Armadillo-like helical;IPR016024 Armadillo-type fold;IPR021133 HEAT, type 2;IPR040362 RAB11-binding protein RELCH	ENOG503BE1U	T:(T) Signal transduction mechanisms	GO_component: GO:0005802 - trans-Golgi network [Evidence IEA];GO_component: GO:0055037 - recycling endosome [Evidence IEA];GO_function: GO:0005515 - protein binding [Evidence IEA];GO_process: GO:0032367 - intracellular cholesterol transport [Evidence IEA]
FUN_000169	FUN_000169-T1	mRNA	scaffold_1	2960854	2971932	+	CDT1_1	replication licensing factor Cdt1				PF08839;PF16679	IPR014939 CDT1 Geminin-binding domain-like;IPR032054 DNA replication factor Cdt1, C-terminal;IPR036390 Winged helix DNA-binding domain superfamily;IPR038090 DNA replication factor Cdt1, C-terminal WH domain superfamily;IPR045173 DNA replication factor Cdt1	ENOG503BDTD	L:(L) Replication, recombination and repair	GO_component: GO:0005634 - nucleus [Evidence IEA];GO_function: GO:0003677 - DNA binding [Evidence IEA];GO_function: GO:0070182 - DNA polymerase binding [Evidence IEA];GO_process: GO:0000278 - mitotic cell cycle [Evidence IEA];GO_process: GO:0071163 - DNA replication preinitiation complex assembly [Evidence IEA];GO_process: GO:0030174 - regulation of DNA-templated DNA replication initiation [Evide…
FUN_000171	FUN_000171-T1	mRNA	scaffold_1	2990844	2997517	-	TK2_1	deoxycytidine metabolic process				PF01712	IPR027417 P-loop containing nucleoside triphosphate hydrolase;IPR031314 Deoxynucleoside kinase domain;IPR050566 Deoxyribonucleoside Kinase	ENOG503BABN	F:(F) Nucleotide transport and metabolism	GO_component: GO:0005739 - mitochondrion [Evidence IEA];GO_component: GO:0005737 - cytoplasm [Evidence IEA];GO_function: GO:0019136 - deoxynucleoside kinase activity [Evidence IEA]
FUN_000172	FUN_000172-T1	mRNA	scaffold_1	2997649	3016779	+	DHRS2	Dehydrogenase/reductase SDR member 2, mitochondrial				PF00106;PF08659;PF13561;PF23441	IPR002347 Short-chain dehydrogenase/reductase SDR;IPR036291 NAD(P)-binding domain superfamily	ENOG503BEAY	Q:(Q) Secondary metabolites biosynthesis, transport and catabolism	GO_function: GO:0004090 - carbonyl reductase (NADPH) activity [Evidence IEA]
FUN_000173	FUN_000173-T1	mRNA	scaffold_1	3018841	3025202	+		hypothetical protein
FUN_000174	FUN_000174-T1	mRNA	scaffold_1	3029359	3043413	-	SLC7A9_1	b(0,+)-type amino acid transporter 1				PF00324;PF13520	IPR002293 Amino acid/polyamine transporter I;IPR050598 Cellular Amino Acid Transporter	ENOG503B9U2	E:(E) Amino acid transport and metabolism	GO_component: GO:0016020 - membrane [Evidence IEA];GO_function: GO:0015179 - L-amino acid transmembrane transporter activity [Evidence IEA];GO_function: GO:0022857 - transmembrane transporter activity [Evidence IEA];GO_process: GO:0003333 - amino acid transmembrane transport [Evidence IEA];GO_process: GO:0055085 - transmembrane transport [Evidence IEA]
FUN_000175	FUN_000175-T1	mRNA	scaffold_1	3048803	3057499	-	SLC7A9_2	b(0,+)-type amino acid transporter 1					IPR050598 Cellular Amino Acid Transporter	ENOG503B9U2	E:(E) Amino acid transport and metabolism	GO_function: GO:0015179 - L-amino acid transmembrane transporter activity [Evidence IEA];GO_process: GO:0003333 - amino acid transmembrane transport [Evidence IEA]
FUN_000177	FUN_000177-T1	mRNA	scaffold_1	3102983	3103513	+		hypothetical protein
FUN_000178	FUN_000178-T1	mRNA	scaffold_1	3212472	3213278	-		hypothetical protein					IPR035914 Spermadhesin, CUB domain superfamily
FUN_000179	FUN_000179-T1	mRNA	scaffold_1	3213634	3243554	-		hypothetical protein				PF00431	IPR000859 CUB domain;IPR035914 Spermadhesin, CUB domain superfamily	ENOG503BGFY	T:(T) Signal transduction mechanisms
FUN_000180	FUN_000180-T1	mRNA	scaffold_1	3283907	3286104	-		hypothetical protein
FUN_000182	FUN_000182-T1	mRNA	scaffold_1	3291335	3303400	-		hypothetical protein		3.2.1.8		PF00331;PF02018	IPR001000 Glycoside hydrolase family 10 domain;IPR003305 Carbohydrate-binding, CenC-like;IPR008979 Galactose-binding-like domain superfamily;IPR017853 Glycoside hydrolase superfamily;IPR044846 Glycoside hydrolase family 10	ENOG503CMQW	G:(G) Carbohydrate transport and metabolism	GO_function: GO:0016798 - hydrolase activity, acting on glycosyl bonds [Evidence IEA];GO_function: GO:0004553 - hydrolase activity, hydrolyzing O-glycosyl compounds [Evidence IEA];GO_process: GO:0005975 - carbohydrate metabolic process [Evidence IEA]				CBM22
FUN_000183	FUN_000183-T1	mRNA	scaffold_1	3309062	3316334	-		hypothetical protein				PF00331;PF02018	IPR001000 Glycoside hydrolase family 10 domain;IPR003305 Carbohydrate-binding, CenC-like;IPR008979 Galactose-binding-like domain superfamily;IPR017853 Glycoside hydrolase superfamily;IPR044846 Glycoside hydrolase family 10	ENOG503GXR9	G:(G) Carbohydrate transport and metabolism	GO_function: GO:0016798 - hydrolase activity, acting on glycosyl bonds [Evidence IEA];GO_function: GO:0004553 - hydrolase activity, hydrolyzing O-glycosyl compounds [Evidence IEA];GO_process: GO:0005975 - carbohydrate metabolic process [Evidence IEA]				CBM22;GH10
FUN_000184	FUN_000184-T1	mRNA	scaffold_1	3334826	3339098	-		hypothetical protein						ENOG503BGJ2	T:(T) Signal transduction mechanisms
FUN_000185	FUN_000185-T1	mRNA	scaffold_1	3339115	3339731	-		hypothetical protein
FUN_000188	FUN_000188-T1	mRNA	scaffold_1	3357966	3359559	-		hypothetical protein		3.4.24.79			IPR043543 Pappalysin-1/2	ENOG503BGZ5	T:(T) Signal transduction mechanisms	GO_component: GO:0005615 - extracellular space [Evidence IEA];GO_function: GO:0004222 - metalloendopeptidase activity [Evidence IEA];GO_process: GO:0006508 - proteolysis [Evidence IEA];GO_process: GO:0007166 - cell surface receptor signaling pathway [Evidence IEA]
FUN_000189	FUN_000189-T1	mRNA	scaffold_1	3362290	3365662	-		hypothetical protein		3.4.24.79		PF00084	IPR000436 Sushi/SCR/CCP domain;IPR035976 Sushi/SCR/CCP superfamily;IPR043543 Pappalysin-1/2	ENOG503BGZ5	T:(T) Signal transduction mechanisms	GO_component: GO:0005615 - extracellular space [Evidence IEA];GO_function: GO:0004222 - metalloendopeptidase activity [Evidence IEA];GO_process: GO:0006508 - proteolysis [Evidence IEA];GO_process: GO:0007166 - cell surface receptor signaling pathway [Evidence IEA]
FUN_000191	FUN_000191-T1	mRNA	scaffold_1	3382113	3383104	+	KCTD14_1	BTB/POZ domain-containing protein kctd14				PF02214	IPR000210 BTB/POZ domain;IPR003131 Potassium channel tetramerisation-type BTB domain;IPR011333 SKP1/BTB/POZ domain superfamily	ENOG503BAVS	L:(L) Replication, recombination and repair	GO_function: GO:0005515 - protein binding [Evidence IEA];GO_process: GO:0051260 - protein homooligomerization [Evidence IEA]
FUN_000192	FUN_000192-T1	mRNA	scaffold_1	3388014	3394237	+	KCTD16_1	BTB/POZ domain-containing protein kctd16				PF02214	IPR000210 BTB/POZ domain;IPR003131 Potassium channel tetramerisation-type BTB domain;IPR011333 SKP1/BTB/POZ domain superfamily	ENOG503BJQK	S:(S) Function unknown	GO_function: GO:0005515 - protein binding [Evidence IEA];GO_process: GO:0051260 - protein homooligomerization [Evidence IEA]
FUN_000193	FUN_000193-T1	mRNA	scaffold_1	3403564	3408641	-		hypothetical protein					IPR040362 RAB11-binding protein RELCH	ENOG503BE1U	T:(T) Signal transduction mechanisms	GO_component: GO:0005802 - trans-Golgi network [Evidence IEA];GO_component: GO:0055037 - recycling endosome [Evidence IEA];GO_process: GO:0032367 - intracellular cholesterol transport [Evidence IEA]
FUN_000194	FUN_000194-T1	mRNA	scaffold_1	3408824	3422804	+	CDT1_2	replication licensing factor Cdt1				PF08839;PF16679	IPR014939 CDT1 Geminin-binding domain-like;IPR032054 DNA replication factor Cdt1, C-terminal;IPR036390 Winged helix DNA-binding domain superfamily;IPR038090 DNA replication factor Cdt1, C-terminal WH domain superfamily;IPR045173 DNA replication factor Cdt1	ENOG503BDTD	L:(L) Replication, recombination and repair	GO_component: GO:0005634 - nucleus [Evidence IEA];GO_function: GO:0003677 - DNA binding [Evidence IEA];GO_function: GO:0070182 - DNA polymerase binding [Evidence IEA];GO_process: GO:0000278 - mitotic cell cycle [Evidence IEA];GO_process: GO:0071163 - DNA replication preinitiation complex assembly [Evidence IEA];GO_process: GO:0030174 - regulation of DNA-templated DNA replication initiation [Evide…
FUN_000196	FUN_000196-T1	mRNA	scaffold_1	3437306	3443666	-	TK2_2	deoxycytidine metabolic process				PF01712	IPR002624 Deoxynucleoside kinase;IPR027417 P-loop containing nucleoside triphosphate hydrolase;IPR031314 Deoxynucleoside kinase domain;IPR050566 Deoxyribonucleoside Kinase	ENOG503BABN	F:(F) Nucleotide transport and metabolism	GO_component: GO:0005739 - mitochondrion [Evidence IEA];GO_component: GO:0005737 - cytoplasm [Evidence IEA];GO_function: GO:0019136 - deoxynucleoside kinase activity [Evidence IEA];GO_function: GO:0005524 - ATP binding [Evidence IEA];GO_process: GO:0006139 - nucleobase-containing compound metabolic process [Evidence IEA]
FUN_000197	FUN_000197-T1	mRNA	scaffold_1	3495471	3500711	-		hypothetical protein				PF00001	IPR000276 G protein-coupled receptor, rhodopsin-like;IPR017452 GPCR, rhodopsin-like, 7TM	ENOG503BVAS	S:(S) Function unknown	GO_component: GO:0016020 - membrane [Evidence IEA];GO_component: GO:0005886 - plasma membrane [Evidence IEA];GO_function: GO:0004930 - G protein-coupled receptor activity [Evidence IEA];GO_process: GO:0007186 - G protein-coupled receptor signaling pathway [Evidence IEA]
FUN_000199	FUN_000199-T1	mRNA	scaffold_1	3509072	3532639	-		hypothetical protein
FUN_000200	FUN_000200-T1	mRNA	scaffold_1	3545769	3553615	+		hypothetical protein
FUN_000201	FUN_000201-T1	mRNA	scaffold_1	3554093	3554623	+		hypothetical protein
FUN_000202	FUN_000202-T1	mRNA	scaffold_1	3623748	3624731	+		hypothetical protein					IPR026135 Uncharacterised protein C6orf15			GO_component: GO:0031012 - extracellular matrix [Evidence IEA];GO_process: GO:0030198 - extracellular matrix organization [Evidence IEA]
FUN_000209	FUN_000209-T1	mRNA	scaffold_1	3666244	3896905	+	ATP2C1	ATPase, P-type (transporting), HAD super, sub IC		7.2.2.10	809at6447	PF00122;PF00689;PF00690;PF00702;PF13246	IPR001757 P-type ATPase;IPR004014 Cation-transporting P-type ATPase, N-terminal;IPR006068 Cation-transporting P-type ATPase, C-terminal;IPR006413 P-type ATPase, subfamily IIA, PMR1-type;IPR008250 P-type ATPase, A domain superfamily;IPR018303 P-type ATPase, phosphorylation site;IPR023214 HAD superfamily;IPR023298 P-type ATPase, transmembrane domain superfamily;IPR023299 P-type ATPase, cytoplasmic …	ENOG503BAM2	P:(P) Inorganic ion transport and metabolism	GO_component: GO:0016020 - membrane [Evidence IEA];GO_function: GO:0005215 - transporter activity [Evidence IEA];GO_function: GO:0016887 - ATP hydrolysis activity [Evidence IEA];GO_function: GO:0005524 - ATP binding [Evidence IEA];GO_function: GO:0005388 - P-type calcium transporter activity [Evidence IEA];GO_function: GO:0000166 - nucleotide binding [Evidence IEA];GO_process: GO:0006816 - calciu…
FUN_094526	FUN_094526-T1	mRNA	scaffold_1	3790924	3830351	-		hypothetical protein				PF00230	IPR000425 Major intrinsic protein;IPR023271 Aquaporin-like;IPR034294 Aquaporin transporter	ENOG503BGGI	G:(G) Carbohydrate transport and metabolism	GO_component: GO:0016020 - membrane [Evidence IEA];GO_component: GO:0005886 - plasma membrane [Evidence IEA];GO_function: GO:0015267 - channel activity [Evidence IEA];GO_function: GO:0015250 - water channel activity [Evidence IEA];GO_process: GO:0006833 - water transport [Evidence IEA];GO_process: GO:0055085 - transmembrane transport [Evidence IEA]
FUN_000211	FUN_000211-T1	mRNA	scaffold_1	3911608	3913533	+	NAE1_1	NEDD8-activating enzyme E1 regulatory subunit			2613at6447	PF00899	IPR000594 THIF-type NAD/FAD binding fold;IPR030667 NEDD8-activating enzyme E1 regulatory subunit APP-BP1;IPR035985 Ubiquitin-activating enzyme;IPR045886 ThiF/MoeB/HesA family	ENOG503BGZ3	O:(O) Posttranslational modification, protein turnover, chaperones	GO_component: GO:0005737 - cytoplasm [Evidence IEA];GO_function: GO:0008641 - ubiquitin-like modifier activating enzyme activity [Evidence IEA];GO_function: GO:0019781 - NEDD8 activating enzyme activity [Evidence IEA];GO_process: GO:0032446 - protein modification by small protein conjugation [Evidence IEA];GO_process: GO:0045116 - protein neddylation [Evidence IEA]
FUN_000214	FUN_000214-T1	mRNA	scaffold_1	3935258	3947317	+		hypothetical protein		6.3.2.3			IPR005615 Glutathione synthase;IPR014049 Glutathione synthase, N-terminal, eukaryotic;IPR016185 Pre-ATP-grasp domain superfamily;IPR037013 Glutathione synthase, substrate-binding domain superfamily	ENOG503B9ND	Q:(Q) Secondary metabolites biosynthesis, transport and catabolism	GO_function: GO:0005524 - ATP binding [Evidence IEA];GO_function: GO:0004363 - glutathione synthase activity [Evidence IEA];GO_process: GO:0006750 - glutathione biosynthetic process [Evidence IEA]
FUN_000215	FUN_000215-T1	mRNA	scaffold_1	3951307	3951843	+		hypothetical protein
FUN_000216	FUN_000216-T1	mRNA	scaffold_1	3952359	3953248	+		hypothetical protein
FUN_000217	FUN_000217-T1	mRNA	scaffold_1	3953567	3965652	+		hypothetical protein		6.3.2.3		PF03199;PF03917	IPR004887 Glutathione synthase, substrate-binding domain;IPR005615 Glutathione synthase;IPR014709 Glutathione synthase, C-terminal, eukaryotic;IPR016185 Pre-ATP-grasp domain superfamily;IPR037013 Glutathione synthase, substrate-binding domain superfamily	ENOG503B9ND	Q:(Q) Secondary metabolites biosynthesis, transport and catabolism	GO_component: GO:0005829 - cytosol [Evidence IEA];GO_function: GO:0043295 - glutathione binding [Evidence IEA];GO_function: GO:0005524 - ATP binding [Evidence IEA];GO_function: GO:0004363 - glutathione synthase activity [Evidence IEA];GO_process: GO:0006750 - glutathione biosynthetic process [Evidence IEA]
FUN_000218	FUN_000218-T1	mRNA	scaffold_1	4001647	4005839	-		hypothetical protein				PF00024;PF00754;PF22633	IPR003609 PAN/Apple domain;IPR006585 Fucolectin tachylectin-4 pentraxin-1;IPR008979 Galactose-binding-like domain superfamily;IPR051941 Blood Group Antigen-Binding Lectin	ENOG502QQVA	S:(S) Function unknown					CBM47
FUN_000223	FUN_000223-T1	mRNA	scaffold_1	4033672	4042103	-		hypothetical protein		3.4.16.5			IPR001563 Peptidase S10, serine carboxypeptidase;IPR029058 Alpha/Beta hydrolase fold	ENOG503BDSA	O:(O) Posttranslational modification, protein turnover, chaperones	GO_function: GO:0004185 - serine-type carboxypeptidase activity [Evidence IEA];GO_process: GO:0006508 - proteolysis [Evidence IEA]			S10
FUN_000224	FUN_000224-T1	mRNA	scaffold_1	4041526	4248059	-		hypothetical protein		3.4.16.5		PF00450	IPR001563 Peptidase S10, serine carboxypeptidase;IPR018202 Serine carboxypeptidase, serine active site;IPR029058 Alpha/Beta hydrolase fold;IPR033124 Serine carboxypeptidases, histidine active site	ENOG503BDSA	E:(E) Amino acid transport and metabolism;O:(O) Posttranslational modification, protein turnover, chaperones	GO_function: GO:0004185 - serine-type carboxypeptidase activity [Evidence IEA];GO_process: GO:0006508 - proteolysis [Evidence IEA]			S10
FUN_000225	FUN_000225-T1	mRNA	scaffold_1	4252764	4272132	+		hypothetical protein		2.3.1.234	3611at6447	PF00814;PF22521	IPR000905 Gcp-like domain;IPR017860 Peptidase M22, conserved site;IPR017861 Kae1/TsaD family;IPR043129 ATPase, nucleotide binding domain	ENOG503BC7I	O:(O) Posttranslational modification, protein turnover, chaperones	GO_component: GO:0005737 - cytoplasm [Evidence IEA];GO_component: GO:0000408 - EKC/KEOPS complex [Evidence IEA]
FUN_000226	FUN_000226-T1	mRNA	scaffold_1	4277274	4278104	+		hypothetical protein
FUN_000227	FUN_000227-T1	mRNA	scaffold_1	4298029	4387427	+		hypothetical protein				PF00023;PF12796;PF13606;PF13637;PF13857	IPR002110 Ankyrin repeat;IPR036770 Ankyrin repeat-containing domain superfamily;IPR051226 Protein Phosphatase 1 Regulatory Subunit	ENOG503B989	O:(O) Posttranslational modification, protein turnover, chaperones;T:(T) Signal transduction mechanisms	GO_component: GO:0005737 - cytoplasm [Evidence IEA];GO_function: GO:0004857 - enzyme inhibitor activity [Evidence IEA];GO_function: GO:0005515 - protein binding [Evidence IEA];GO_function: GO:0019208 - phosphatase regulator activity [Evidence IEA];GO_function: GO:0017020 - myosin phosphatase regulator activity [Evidence IEA]
FUN_000227	FUN_000227-T2	mRNA	scaffold_1	4298029	4387427	+		hypothetical protein				PF00023;PF12796;PF13606;PF13637;PF13857	IPR002110 Ankyrin repeat;IPR036770 Ankyrin repeat-containing domain superfamily;IPR051226 Protein Phosphatase 1 Regulatory Subunit	ENOG503B989	O:(O) Posttranslational modification, protein turnover, chaperones;T:(T) Signal transduction mechanisms	GO_component: GO:0005737 - cytoplasm [Evidence IEA];GO_function: GO:0004857 - enzyme inhibitor activity [Evidence IEA];GO_function: GO:0005515 - protein binding [Evidence IEA];GO_function: GO:0019208 - phosphatase regulator activity [Evidence IEA];GO_function: GO:0017020 - myosin phosphatase regulator activity [Evidence IEA]
FUN_000228	FUN_000228-T1	mRNA	scaffold_1	4407351	4410886	-	FBXL8	ubiquitin-protein transferase activity				PF00646;PF12937	IPR001810 F-box domain;IPR032675 Leucine-rich repeat domain superfamily;IPR036047 F-box-like domain superfamily	ENOG503BDGM	S:(S) Function unknown	GO_function: GO:0005515 - protein binding [Evidence IEA];GO_process: GO:0031398 - positive regulation of protein ubiquitination [Evidence IEA]
FUN_000230	FUN_000230-T1	mRNA	scaffold_1	4412321	4581509	-	STX16	Syntaxin-16			5890at6447	PF05739	IPR000727 Target SNARE coiled-coil homology domain;IPR006012 Syntaxin/epimorphin, conserved site;IPR010989 SNARE;IPR045242 Syntaxin	ENOG503BDGN	U:(U) Intracellular trafficking, secretion, and vesicular transport	GO_component: GO:0012505 - endomembrane system [Evidence IEA];GO_component: GO:0016020 - membrane [Evidence IEA];GO_component: GO:0031201 - SNARE complex [Evidence IEA];GO_function: GO:0005484 - SNAP receptor activity [Evidence IEA];GO_function: GO:0000149 - SNARE binding [Evidence IEA];GO_process: GO:0006906 - vesicle fusion [Evidence IEA];GO_process: GO:0016192 - vesicle-mediated transport [Evi…
FUN_000231	FUN_000231-T1	mRNA	scaffold_1	4586582	4593895	+	SLC6A7_2	L-proline transmembrane transporter activity					IPR000175 Sodium:neurotransmitter symporter;IPR037272 Sodium:neurotransmitter symporter superfamily;IPR040646 Fanconi anemia core complex-associated protein 24, pseudonuclease domain	ENOG503BBRV	P:(P) Inorganic ion transport and metabolism	GO_component: GO:0016020 - membrane [Evidence IEA];GO_component: GO:0005886 - plasma membrane [Evidence IEA];GO_function: GO:0005283 - amino acid:sodium symporter activity [Evidence IEA];GO_process: GO:0089718 - amino acid import across plasma membrane [Evidence IEA];GO_process: GO:0071705 - nitrogen compound transport [Evidence IEA];GO_process: GO:0035725 - sodium ion transmembrane transport [Ev…
FUN_000233	FUN_000233-T1	mRNA	scaffold_1	4622122	4625796	-	TIGD5	Tigger transposable element-derived protein 5					IPR009057 Homedomain-like superfamily;IPR036388 Winged helix-like DNA-binding domain superfamily	ENOG503CQGA	K:(K) Transcription
FUN_000234	FUN_000234-T1	mRNA	scaffold_1	4649452	4650546	-		hypothetical protein					IPR001128 Cytochrome P450;IPR002401 Cytochrome P450, E-class, group I;IPR017972 Cytochrome P450, conserved site;IPR036396 Cytochrome P450 superfamily;IPR050476 Insect Cytochrome P450 Detoxification	ENOG503BF8S	Q:(Q) Secondary metabolites biosynthesis, transport and catabolism	GO_function: GO:0020037 - heme binding [Evidence IEA];GO_function: GO:0016705 - oxidoreductase activity, acting on paired donors, with incorporation or reduction of molecular oxygen [Evidence IEA];GO_function: GO:0005506 - iron ion binding [Evidence IEA];GO_function: GO:0004497 - monooxygenase activity [Evidence IEA]
FUN_000235	FUN_000235-T1	mRNA	scaffold_1	4651382	4653929	-	CYP3A4_1	Cytochrome P450 3A4					IPR001128 Cytochrome P450;IPR002401 Cytochrome P450, E-class, group I;IPR036396 Cytochrome P450 superfamily;IPR050705 Cytochrome P450 3A	ENOG503BF8S	Q:(Q) Secondary metabolites biosynthesis, transport and catabolism	GO_function: GO:0008395 - steroid hydroxylase activity [Evidence IEA];GO_function: GO:0016705 - oxidoreductase activity, acting on paired donors, with incorporation or reduction of molecular oxygen [Evidence IEA];GO_function: GO:0020037 - heme binding [Evidence IEA];GO_function: GO:0004497 - monooxygenase activity [Evidence IEA];GO_function: GO:0005506 - iron ion binding [Evidence IEA]
FUN_000236	FUN_000236-T1	mRNA	scaffold_1	4655887	4657373	-	MORC4_1	MORC CW-type zinc finger					IPR036396 Cytochrome P450 superfamily;IPR050705 Cytochrome P450 3A	ENOG503BH9S	D:(D) Cell cycle control, cell division, chromosome partitioning	GO_function: GO:0008395 - steroid hydroxylase activity [Evidence IEA];GO_function: GO:0016705 - oxidoreductase activity, acting on paired donors, with incorporation or reduction of molecular oxygen [Evidence IEA];GO_function: GO:0020037 - heme binding [Evidence IEA];GO_function: GO:0004497 - monooxygenase activity [Evidence IEA];GO_function: GO:0005506 - iron ion binding [Evidence IEA]
FUN_000238	FUN_000238-T1	mRNA	scaffold_1	4692811	4695145	+		hypothetical protein
FUN_000242	FUN_000242-T1	mRNA	scaffold_1	4767355	4804643	+	HVCN1_1	Voltage-gated hydrogen channel 1					IPR027359 Voltage-dependent channel domain superfamily;IPR031846 Voltage-gated hydrogen channel 1	ENOG503BHQ5	P:(P) Inorganic ion transport and metabolism	GO_component: GO:0005886 - plasma membrane [Evidence IEA];GO_function: GO:0030171 - voltage-gated proton channel activity [Evidence IEA];GO_process: GO:1902600 - proton transmembrane transport [Evidence IEA]
FUN_000244	FUN_000244-T1	mRNA	scaffold_1	4828773	4851322	+		hypothetical protein		1.1.1.14		PF00107;PF08240	IPR002328 Alcohol dehydrogenase, zinc-type, conserved site;IPR011032 GroES-like superfamily;IPR013149 Alcohol dehydrogenase-like, C-terminal;IPR013154 Alcohol dehydrogenase-like, N-terminal;IPR020843 Polyketide synthase, enoylreductase domain;IPR036291 NAD(P)-binding domain superfamily;IPR045306 Sorbitol dehydrogenase-like	ENOG503B9JA	Q:(Q) Secondary metabolites biosynthesis, transport and catabolism	GO_function: GO:0016616 - oxidoreductase activity, acting on the CH-OH group of donors, NAD or NADP as acceptor [Evidence IEA];GO_function: GO:0016491 - oxidoreductase activity [Evidence IEA];GO_function: GO:0008270 - zinc ion binding [Evidence IEA];GO_function: GO:0003939 - L-iditol 2-dehydrogenase (NAD+) activity [Evidence IEA];GO_process: GO:0006062 - sorbitol catabolic process [Evidence IEA]
FUN_000245	FUN_000245-T1	mRNA	scaffold_1	4881992	4882399	-		hypothetical protein
FUN_000246	FUN_000246-T1	mRNA	scaffold_1	4885199	4885775	-		hypothetical protein
FUN_000247	FUN_000247-T1	mRNA	scaffold_1	4916680	4922684	+		hypothetical protein		2.1.1.103		PF01135;PF02353;PF08003;PF08241;PF08242;PF13489;PF13649;PF13847	IPR029063 S-adenosyl-L-methionine-dependent methyltransferase superfamily	ENOG503BHPW	I:(I) Lipid transport and metabolism
FUN_000248	FUN_000248-T1	mRNA	scaffold_1	4933454	4948435	+		hypothetical protein					IPR000175 Sodium:neurotransmitter symporter;IPR037272 Sodium:neurotransmitter symporter superfamily	ENOG503BBRV	T:(T) Signal transduction mechanisms	GO_component: GO:0016020 - membrane [Evidence IEA];GO_component: GO:0005886 - plasma membrane [Evidence IEA];GO_function: GO:0005283 - amino acid:sodium symporter activity [Evidence IEA];GO_process: GO:0089718 - amino acid import across plasma membrane [Evidence IEA];GO_process: GO:0071705 - nitrogen compound transport [Evidence IEA];GO_process: GO:0035725 - sodium ion transmembrane transport [Ev…
FUN_000251	FUN_000251-T1	mRNA	scaffold_1	5011791	5014238	-		hypothetical protein					IPR000175 Sodium:neurotransmitter symporter;IPR037272 Sodium:neurotransmitter symporter superfamily	ENOG503BB0B	T:(T) Signal transduction mechanisms	GO_component: GO:0016020 - membrane [Evidence IEA];GO_component: GO:0005886 - plasma membrane [Evidence IEA];GO_function: GO:0015374 - neutral, basic amino acid:sodium:chloride symporter activity [Evidence IEA];GO_function: GO:0022858 - alanine transmembrane transporter activity [Evidence IEA];GO_function: GO:1901235 - (R)-carnitine transmembrane transporter activity [Evidence IEA];GO_function: G…
FUN_000253	FUN_000253-T1	mRNA	scaffold_1	5103127	5106959	-	GLIPR1_1	Glioma pathoproteinsis-related protein 1				PF00188	IPR001283 Cysteine-rich secretory protein-related;IPR014044 CAP domain;IPR018244 Allergen V5/Tpx-1-related, conserved site;IPR035940 CAP superfamily	ENOG503BHZ2	S:(S) Function unknown	GO_component: GO:0005576 - extracellular region [Evidence IEA]
FUN_000254	FUN_000254-T1	mRNA	scaffold_1	5129371	5129872	+	INPP5D_1	Phosphatidylinositol 3,4,5-trisphosphate 5-phosphatase 1		3.1.3.86		PF24147		ENOG503BCQY	U:(U) Intracellular trafficking, secretion, and vesicular transport	GO_process: GO:0050776 - regulation of immune response [Evidence IEA];GO_process: GO:0009966 - regulation of signal transduction [Evidence IEA]
FUN_000256	FUN_000256-T1	mRNA	scaffold_1	5152325	5152693	+		hypothetical protein
FUN_000257	FUN_000257-T1	mRNA	scaffold_1	5158529	5172634	-	MED11_1	Mediator of RNA polymerase II transcription subunit 11				PF10280	IPR019404 Mediator complex, subunit Med11	ENOG503BRY4	K:(K) Transcription	GO_component: GO:0016592 - mediator complex [Evidence IEA];GO_function: GO:0003712 - transcription coregulator activity [Evidence IEA];GO_process: GO:0006357 - regulation of transcription by RNA polymerase II [Evidence IEA]
FUN_000260	FUN_000260-T1	mRNA	scaffold_1	5212336	5218217	+	PROKR2_1	pancreatic polypeptide receptor activity					IPR035940 CAP superfamily	ENOG503BHI4	T:(T) Signal transduction mechanisms
FUN_000262	FUN_000262-T1	mRNA	scaffold_1	5281748	5310754	-	SEC22A	Vesicle-trafficking protein S22a				PF13774	IPR010908 Longin domain;IPR011012 Longin-like domain superfamily;IPR044565 Vesicle-trafficking protein Sec22	ENOG503BF4S	U:(U) Intracellular trafficking, secretion, and vesicular transport	GO_function: GO:0005484 - SNAP receptor activity [Evidence IEA];GO_process: GO:0006890 - retrograde vesicle-mediated transport, Golgi to endoplasmic reticulum [Evidence IEA];GO_process: GO:0006888 - endoplasmic reticulum to Golgi vesicle-mediated transport [Evidence IEA]
FUN_000263	FUN_000263-T1	mRNA	scaffold_1	5384599	5400193	-	CLCC1_1	chloride channel activity					IPR009231 Chloride channel CLIC-like	ENOG503BARK	S:(S) Function unknown	GO_component: GO:0005783 - endoplasmic reticulum [Evidence IEA];GO_component: GO:0016020 - membrane [Evidence IEA];GO_function: GO:0005254 - chloride channel activity [Evidence IEA]
FUN_000265	FUN_000265-T1	mRNA	scaffold_1	5493737	5494224	-		hypothetical protein
FUN_000266	FUN_000266-T1	mRNA	scaffold_1	5494670	5495134	-		hypothetical protein
FUN_000267	FUN_000267-T1	mRNA	scaffold_1	5508977	5512523	-	GLIPR1_2	Glioma pathoproteinsis-related protein 1				PF00188	IPR001283 Cysteine-rich secretory protein-related;IPR002413 Venom allergen 5-like;IPR014044 CAP domain;IPR018244 Allergen V5/Tpx-1-related, conserved site;IPR035940 CAP superfamily	ENOG503BHZ2	S:(S) Function unknown	GO_component: GO:0005576 - extracellular region [Evidence IEA]
FUN_000273	FUN_000273-T1	mRNA	scaffold_1	5546363	5560369	+		hypothetical protein					IPR014044 CAP domain;IPR035940 CAP superfamily
FUN_000274	FUN_000274-T1	mRNA	scaffold_1	5648084	5740512	+		hypothetical protein				PF00059;PF00431	IPR000742 EGF-like domain;IPR000859 CUB domain;IPR001304 C-type lectin-like;IPR016186 C-type lectin-like/link domain superfamily;IPR016187 C-type lectin fold;IPR035914 Spermadhesin, CUB domain superfamily	ENOG503BK8A	T:(T) Signal transduction mechanisms;V:(V) Defense mechanisms
FUN_000281	FUN_000281-T1	mRNA	scaffold_1	5790999	5793529	-	HIF1A_1	Hypoxia-inducible factor 1-alpha		2.3.2.23		PF00989;PF08447;PF14598	IPR000014 PAS domain;IPR001610 PAC motif;IPR013655 PAS fold-3;IPR035965 PAS domain superfamily	ENOG503BEJX	K:(K) Transcription	GO_function: GO:0000977 - RNA polymerase II transcription regulatory region sequence-specific DNA binding [Evidence IEA];GO_function: GO:0000981 - DNA-binding transcription factor activity, RNA polymerase II-specific [Evidence IEA];GO_function: GO:0005515 - protein binding [Evidence IEA];GO_process: GO:0006357 - regulation of transcription by RNA polymerase II [Evidence IEA];GO_process: GO:007145…
FUN_000282	FUN_000282-T1	mRNA	scaffold_1	5794498	5797034	-		hypothetical protein		1.14.15.16			IPR001128 Cytochrome P450;IPR002401 Cytochrome P450, E-class, group I;IPR017972 Cytochrome P450, conserved site;IPR036396 Cytochrome P450 superfamily;IPR050479 Cytochrome P450, families 11 and 27	ENOG503B9J4	Q:(Q) Secondary metabolites biosynthesis, transport and catabolism	GO_function: GO:0020037 - heme binding [Evidence IEA];GO_function: GO:0016705 - oxidoreductase activity, acting on paired donors, with incorporation or reduction of molecular oxygen [Evidence IEA];GO_function: GO:0005506 - iron ion binding [Evidence IEA];GO_function: GO:0004497 - monooxygenase activity [Evidence IEA]
FUN_000283	FUN_000283-T1	mRNA	scaffold_1	5963116	5966867	-		hypothetical protein				PF00025	IPR006689 Small GTPase superfamily, ARF/SAR type;IPR024156 Small GTPase superfamily, ARF type;IPR027417 P-loop containing nucleoside triphosphate hydrolase	ENOG503BC0T	U:(U) Intracellular trafficking, secretion, and vesicular transport	GO_function: GO:0005525 - GTP binding [Evidence IEA];GO_function: GO:0003924 - GTPase activity [Evidence IEA]
FUN_000287	FUN_000287-T1	mRNA	scaffold_1	6059772	6060947	+	OVCH2_1	Ovochymase-2		3.4.21.120			IPR000859 CUB domain;IPR035914 Spermadhesin, CUB domain superfamily	ENOG503BHVY	O:(O) Posttranslational modification, protein turnover, chaperones
FUN_000288	FUN_000288-T1	mRNA	scaffold_1	6063242	6099260	+		hypothetical protein				PF00431	IPR000742 EGF-like domain;IPR000859 CUB domain;IPR035914 Spermadhesin, CUB domain superfamily	ENOG503CPMQ	T:(T) Signal transduction mechanisms
FUN_000289	FUN_000289-T1	mRNA	scaffold_1	6099982	6120241	+		hypothetical protein
FUN_000292	FUN_000292-T1	mRNA	scaffold_1	6122881	6127792	+		hypothetical protein
FUN_000295	FUN_000295-T1	mRNA	scaffold_1	6161020	6166271	+	MID1_1	stretch-activated cation channel mid1		2.3.2.27		PF00643;PF22586	IPR000315 B-box-type zinc finger;IPR050617 E3 ubiquitin-protein ligases and FN3/SPRY domain-containing proteins	ENOG503BCEH	O:(O) Posttranslational modification, protein turnover, chaperones	GO_function: GO:0008270 - zinc ion binding [Evidence IEA]
FUN_000296	FUN_000296-T1	mRNA	scaffold_1	6171435	6177934	-		hypothetical protein				PF00439	IPR001487 Bromodomain;IPR036427 Bromodomain-like superfamily;IPR051831 Bromodomain-containing	ENOG503NWQ8	T:(T) Signal transduction mechanisms	GO_component: GO:0005634 - nucleus [Evidence IEA];GO_function: GO:0005515 - protein binding [Evidence IEA];GO_function: GO:0070577 - lysine-acetylated histone binding [Evidence IEA];GO_process: GO:0006357 - regulation of transcription by RNA polymerase II [Evidence IEA]
FUN_000297	FUN_000297-T1	mRNA	scaffold_1	6186524	6191097	+		hypothetical protein				PF06237	IPR009357 Solute carrier family 52, riboflavin transporter	ENOG503BF98	S:(S) Function unknown	GO_component: GO:0005886 - plasma membrane [Evidence IEA];GO_function: GO:0032217 - riboflavin transmembrane transporter activity [Evidence IEA];GO_process: GO:0032218 - riboflavin transport [Evidence IEA]
FUN_000302	FUN_000302-T1	mRNA	scaffold_1	6301699	6302764	+		hypothetical protein					IPR036259 MFS transporter superfamily			GO_function: GO:0005355 - obsolete glucose transmembrane transporter activity [Evidence IEA]
FUN_000305	FUN_000305-T1	mRNA	scaffold_1	6328705	6378892	-	RAB8B	Ras-related protein Rab-8B				PF00025;PF00071;PF04670;PF08477	IPR001806 Small GTPase;IPR005225 Small GTP-binding domain;IPR027417 P-loop containing nucleoside triphosphate hydrolase;IPR050305 Small GTPase superfamily, Rab	ENOG503B94Q	U:(U) Intracellular trafficking, secretion, and vesicular transport	GO_function: GO:0005525 - GTP binding [Evidence IEA];GO_function: GO:0003924 - GTPase activity [Evidence IEA]
FUN_000311	FUN_000311-T1	mRNA	scaffold_1	6413125	6417508	+	RPS27L	40S ribosomal protein S27-like				PF01667	IPR000592 Small ribosomal subunit protein eS27;IPR011332 Zinc-binding ribosomal protein;IPR023407 Small ribosomal subunit protein eS27, zinc-binding domain superfamily	ENOG503BRH5	J:(J) Translation, ribosomal structure and biogenesis	GO_component: GO:0005840 - ribosome [Evidence IEA];GO_function: GO:0003735 - structural constituent of ribosome [Evidence IEA];GO_process: GO:0006412 - translation [Evidence IEA]
FUN_000316	FUN_000316-T1	mRNA	scaffold_1	6504200	6511361	+	MID1_2	stretch-activated cation channel mid1		2.3.2.27		PF00097;PF00643;PF13445;PF13639;PF13920;PF13923;PF22586	IPR000315 B-box-type zinc finger;IPR001841 Zinc finger, RING-type;IPR013083 Zinc finger, RING/FYVE/PHD-type;IPR017907 Zinc finger, RING-type, conserved site;IPR027370 Zinc finger, RING-type, eukaryotic;IPR047153 TRIM45/56/19-like	ENOG503BCEH	O:(O) Posttranslational modification, protein turnover, chaperones	GO_function: GO:0061630 - ubiquitin protein ligase activity [Evidence IEA];GO_function: GO:0008270 - zinc ion binding [Evidence IEA]
FUN_000317	FUN_000317-T1	mRNA	scaffold_1	6511524	6511835	+		hypothetical protein
FUN_000318	FUN_000318-T1	mRNA	scaffold_1	6528917	6530971	-		hypothetical protein
FUN_000320	FUN_000320-T1	mRNA	scaffold_1	6537564	6556584	-	BRD7	Bromodomain containing protein 7			5621at6447	PF00439;PF12024	IPR001487 Bromodomain;IPR021900 Protein of unknown function DUF3512;IPR036427 Bromodomain-like superfamily;IPR051831 Bromodomain-containing	ENOG503BJWG	K:(K) Transcription	GO_component: GO:0005634 - nucleus [Evidence IEA];GO_function: GO:0005515 - protein binding [Evidence IEA];GO_function: GO:0070577 - lysine-acetylated histone binding [Evidence IEA];GO_process: GO:0006357 - regulation of transcription by RNA polymerase II [Evidence IEA]
FUN_000321	FUN_000321-T1	mRNA	scaffold_1	6563656	6568201	+		hypothetical protein				PF06237	IPR009357 Solute carrier family 52, riboflavin transporter	ENOG503BF98	S:(S) Function unknown	GO_component: GO:0005886 - plasma membrane [Evidence IEA];GO_function: GO:0032217 - riboflavin transmembrane transporter activity [Evidence IEA];GO_process: GO:0032218 - riboflavin transport [Evidence IEA]
FUN_000322	FUN_000322-T1	mRNA	scaffold_1	6592036	6598484	-		hypothetical protein				PF06237	IPR009357 Solute carrier family 52, riboflavin transporter	ENOG503BF98	S:(S) Function unknown	GO_component: GO:0005886 - plasma membrane [Evidence IEA];GO_function: GO:0032217 - riboflavin transmembrane transporter activity [Evidence IEA];GO_process: GO:0032218 - riboflavin transport [Evidence IEA]
FUN_000323	FUN_000323-T1	mRNA	scaffold_1	6613390	6626553	-		hypothetical protein				PF06237	IPR009357 Solute carrier family 52, riboflavin transporter	ENOG503BF98	S:(S) Function unknown	GO_component: GO:0005886 - plasma membrane [Evidence IEA];GO_function: GO:0032217 - riboflavin transmembrane transporter activity [Evidence IEA];GO_process: GO:0032218 - riboflavin transport [Evidence IEA]
FUN_000324	FUN_000324-T1	mRNA	scaffold_1	6672236	6711747	-	RAB22A	Ras-related protein Rab-22A			8669at6447	PF00009;PF00025;PF00071;PF08477	IPR001806 Small GTPase;IPR005225 Small GTP-binding domain;IPR027417 P-loop containing nucleoside triphosphate hydrolase	ENOG503BF7P	U:(U) Intracellular trafficking, secretion, and vesicular transport	GO_function: GO:0005525 - GTP binding [Evidence IEA];GO_function: GO:0003924 - GTPase activity [Evidence IEA]
FUN_000325	FUN_000325-T1	mRNA	scaffold_1	6710960	6732473	+	CSRP1_1	Cysteine and glycine-rich protein 1			8858at6447	PF00412	IPR001781 Zinc finger, LIM-type	ENOG503B9E8	T:(T) Signal transduction mechanisms;Z:(Z) Cytoskeleton	GO_component: GO:0005737 - cytoplasm [Evidence IEA];GO_component: GO:0030018 - Z disc [Evidence IEA];GO_component: GO:0005634 - nucleus [Evidence IEA];GO_function: GO:0042805 - actinin binding [Evidence IEA];GO_function: GO:0008307 - structural constituent of muscle [Evidence IEA];GO_process: GO:0060537 - muscle tissue development [Evidence IEA];GO_process: GO:0030036 - actin cytoskeleton organiz…
FUN_000326	FUN_000326-T1	mRNA	scaffold_1	6745993	6749988	+		hypothetical protein					IPR053337 Autotransporter-2 adhesin	ENOG501GQG8	Q:(Q) Secondary metabolites biosynthesis, transport and catabolism
FUN_000327	FUN_000327-T1	mRNA	scaffold_1	6759453	6761510	-		hypothetical protein				PF06237	IPR009357 Solute carrier family 52, riboflavin transporter	ENOG503BF98	S:(S) Function unknown	GO_component: GO:0005886 - plasma membrane [Evidence IEA];GO_function: GO:0032217 - riboflavin transmembrane transporter activity [Evidence IEA];GO_process: GO:0032218 - riboflavin transport [Evidence IEA]
FUN_000328	FUN_000328-T1	mRNA	scaffold_1	6789131	6790592	-		hypothetical protein
FUN_000330	FUN_000330-T1	mRNA	scaffold_1	6798217	6815537	+	SESTD1_1	S14 domain and spectrin repeat-containing protein 1				PF00435	IPR002017 Spectrin repeat;IPR018159 Spectrin/alpha-actinin	ENOG503BIGJ	T:(T) Signal transduction mechanisms	GO_function: GO:0043325 - phosphatidylinositol-3,4-bisphosphate binding [Evidence IEA];GO_function: GO:0005546 - phosphatidylinositol-4,5-bisphosphate binding [Evidence IEA];GO_function: GO:0010314 - phosphatidylinositol-5-phosphate binding [Evidence IEA];GO_function: GO:0032266 - phosphatidylinositol-3-phosphate binding [Evidence IEA];GO_function: GO:0005515 - protein binding [Evidence IEA];GO_f…
FUN_000335	FUN_000335-T1	mRNA	scaffold_1	6906995	6914443	-		hypothetical protein				PF00188	IPR001283 Cysteine-rich secretory protein-related;IPR002413 Venom allergen 5-like;IPR014044 CAP domain;IPR018244 Allergen V5/Tpx-1-related, conserved site;IPR035940 CAP superfamily	ENOG503BSXC	S:(S) Function unknown	GO_component: GO:0005576 - extracellular region [Evidence IEA]
FUN_000336	FUN_000336-T1	mRNA	scaffold_1	6943016	6959677	-	Glipr1l1_1	SCP / Tpx-1 / Ag5 / PR-1 / Sc7 of extracellular domains.				PF00188	IPR001283 Cysteine-rich secretory protein-related;IPR014044 CAP domain;IPR035940 CAP superfamily	ENOG503BK4U	M:(M) Cell wall/membrane/envelope biogenesis
FUN_000336	FUN_000336-T2	mRNA	scaffold_1	6943016	6959677	-	Glipr1l1_1	SCP / Tpx-1 / Ag5 / PR-1 / Sc7 of extracellular domains., variant 2				PF00188	IPR001283 Cysteine-rich secretory protein-related;IPR014044 CAP domain;IPR035940 CAP superfamily	ENOG503BK4U	M:(M) Cell wall/membrane/envelope biogenesis
FUN_000338	FUN_000338-T1	mRNA	scaffold_1	6995808	7002647	+	CMTM4	CKLF-like MARVEL transmembrane domain-containing protein 4				PF01284	IPR008253 Marvel domain;IPR050578 MARVEL domain-containing and chemokine-like factor proteins	ENOG503BB31	V:(V) Defense mechanisms	GO_component: GO:0016020 - membrane [Evidence IEA]
FUN_000341	FUN_000341-T1	mRNA	scaffold_1	7004908	7064211	+		hypothetical protein				PF01284	IPR008253 Marvel domain;IPR050578 MARVEL domain-containing and chemokine-like factor proteins	ENOG502SVZC	S:(S) Function unknown	GO_component: GO:0016020 - membrane [Evidence IEA]
FUN_000343	FUN_000343-T1	mRNA	scaffold_1	7073199	7084044	+		hypothetical protein
FUN_000344	FUN_000344-T1	mRNA	scaffold_1	7089664	7092931	+		hypothetical protein
FUN_000345	FUN_000345-T1	mRNA	scaffold_1	7098578	7104017	-		hypothetical protein					IPR008253 Marvel domain			GO_component: GO:0016020 - membrane [Evidence IEA]
FUN_000347	FUN_000347-T1	mRNA	scaffold_1	7137953	7148490	-	PROKR2_2	pancreatic polypeptide receptor activity				PF00188	IPR001283 Cysteine-rich secretory protein-related;IPR014044 CAP domain;IPR035940 CAP superfamily	ENOG503BHI4	T:(T) Signal transduction mechanisms
FUN_000348	FUN_000348-T1	mRNA	scaffold_1	7181285	7190936	+		hypothetical protein
FUN_000349	FUN_000349-T1	mRNA	scaffold_1	7191498	7197571	+		hypothetical protein
FUN_000350	FUN_000350-T1	mRNA	scaffold_1	7200806	7212861	+		hypothetical protein				PF00178;PF02198	IPR000418 Ets domain;IPR003118 Pointed domain;IPR013761 Sterile alpha motif/pointed domain superfamily;IPR036388 Winged helix-like DNA-binding domain superfamily;IPR036390 Winged helix DNA-binding domain superfamily;IPR046328 ETS family	ENOG503B9DA	K:(K) Transcription	GO_component: GO:0005634 - nucleus [Evidence IEA];GO_function: GO:0000981 - DNA-binding transcription factor activity, RNA polymerase II-specific [Evidence IEA];GO_function: GO:0043565 - sequence-specific DNA binding [Evidence IEA];GO_function: GO:0003700 - DNA-binding transcription factor activity [Evidence IEA];GO_process: GO:0030154 - cell differentiation [Evidence IEA];GO_process: GO:0006357 …
FUN_000353	FUN_000353-T1	mRNA	scaffold_1	7300902	7338179	+		hypothetical protein				PF00104;PF00105	IPR000536 Nuclear hormone receptor, ligand-binding domain;IPR001628 Zinc finger, nuclear hormone receptor-type;IPR001723 Nuclear hormone receptor;IPR013088 Zinc finger, NHR/GATA-type;IPR035500 Nuclear hormone receptor-like domain superfamily;IPR050234 Nuclear hormone receptor family NR1 subfamily	ENOG503BEWH	K:(K) Transcription	GO_function: GO:0043565 - sequence-specific DNA binding [Evidence IEA];GO_function: GO:0008270 - zinc ion binding [Evidence IEA];GO_function: GO:0003700 - DNA-binding transcription factor activity [Evidence IEA];GO_process: GO:0006355 - regulation of DNA-templated transcription [Evidence IEA]
FUN_000353	FUN_000353-T2	mRNA	scaffold_1	7300902	7338179	+		hypothetical protein				PF00104;PF00105	IPR000536 Nuclear hormone receptor, ligand-binding domain;IPR001628 Zinc finger, nuclear hormone receptor-type;IPR001723 Nuclear hormone receptor;IPR013088 Zinc finger, NHR/GATA-type;IPR035500 Nuclear hormone receptor-like domain superfamily;IPR050234 Nuclear hormone receptor family NR1 subfamily	ENOG503BEWH	K:(K) Transcription	GO_function: GO:0043565 - sequence-specific DNA binding [Evidence IEA];GO_function: GO:0008270 - zinc ion binding [Evidence IEA];GO_function: GO:0003700 - DNA-binding transcription factor activity [Evidence IEA];GO_process: GO:0006355 - regulation of DNA-templated transcription [Evidence IEA]
FUN_000358	FUN_000358-T1	mRNA	scaffold_1	7422920	7423098	-		hypothetical protein
FUN_000364	FUN_000364-T1	mRNA	scaffold_1	7472497	7479372	+	FLI1_1	Friend leukemia integration 1 transcription factor				PF00178	IPR000418 Ets domain;IPR036388 Winged helix-like DNA-binding domain superfamily;IPR036390 Winged helix DNA-binding domain superfamily;IPR046328 ETS family	ENOG503B9DA	K:(K) Transcription	GO_component: GO:0005634 - nucleus [Evidence IEA];GO_function: GO:0000981 - DNA-binding transcription factor activity, RNA polymerase II-specific [Evidence IEA];GO_function: GO:0043565 - sequence-specific DNA binding [Evidence IEA];GO_function: GO:0003700 - DNA-binding transcription factor activity [Evidence IEA];GO_process: GO:0030154 - cell differentiation [Evidence IEA];GO_process: GO:0006357 …
FUN_000365	FUN_000365-T1	mRNA	scaffold_1	7480751	7481296	+	FLI1_2	Friend leukemia integration 1 transcription factor				PF00178	IPR000418 Ets domain;IPR036388 Winged helix-like DNA-binding domain superfamily;IPR036390 Winged helix DNA-binding domain superfamily;IPR046328 ETS family	ENOG503B9DA	K:(K) Transcription	GO_component: GO:0005634 - nucleus [Evidence IEA];GO_function: GO:0000981 - DNA-binding transcription factor activity, RNA polymerase II-specific [Evidence IEA];GO_function: GO:0043565 - sequence-specific DNA binding [Evidence IEA];GO_function: GO:0003700 - DNA-binding transcription factor activity [Evidence IEA];GO_process: GO:0030154 - cell differentiation [Evidence IEA];GO_process: GO:0006357 …
FUN_000367	FUN_000367-T1	mRNA	scaffold_1	7494985	7501341	+		hypothetical protein
FUN_000370	FUN_000370-T1	mRNA	scaffold_1	7517118	7519420	-	CHRNA7_1	Neuronal acetylcholine receptor subunit alpha-7				PF02931	IPR006201 Neurotransmitter-gated ion-channel;IPR006202 Neurotransmitter-gated ion-channel ligand-binding domain;IPR018000 Neurotransmitter-gated ion-channel, conserved site;IPR036734 Neurotransmitter-gated ion-channel ligand-binding domain superfamily;IPR038050 Neuronal acetylcholine receptor	ENOG503BGXC	T:(T) Signal transduction mechanisms	GO_component: GO:0016020 - membrane [Evidence IEA];GO_function: GO:0005216 - monoatomic ion channel activity [Evidence IEA];GO_function: GO:0005230 - extracellular ligand-gated monoatomic ion channel activity [Evidence IEA];GO_function: GO:0004888 - transmembrane signaling receptor activity [Evidence IEA];GO_process: GO:0034220 - monoatomic ion transmembrane transport [Evidence IEA];GO_process: G…
FUN_000374	FUN_000374-T1	mRNA	scaffold_1	7588440	7594138	+		hypothetical protein		2.4.2.1		PF01048	IPR000845 Nucleoside phosphorylase domain;IPR011268 Purine nucleoside phosphorylase;IPR035994 Nucleoside phosphorylase superfamily	ENOG503BDDV	F:(F) Nucleotide transport and metabolism	GO_component: GO:0005737 - cytoplasm [Evidence IEA];GO_function: GO:0003824 - catalytic activity [Evidence IEA];GO_function: GO:0004731 - purine-nucleoside phosphorylase activity [Evidence IEA];GO_process: GO:0006139 - nucleobase-containing compound metabolic process [Evidence IEA];GO_process: GO:0009116 - nucleoside metabolic process [Evidence IEA]
FUN_000375	FUN_000375-T1	mRNA	scaffold_1	7599994	7618147	-		hypothetical protein		2.3.2.27		PF00097;PF13445;PF13923	IPR001841 Zinc finger, RING-type;IPR013083 Zinc finger, RING/FYVE/PHD-type;IPR017907 Zinc finger, RING-type, conserved site;IPR033263 E3 ubiquitin-protein ligase RNF180	ENOG503BCF1	O:(O) Posttranslational modification, protein turnover, chaperones	GO_component: GO:0005789 - endoplasmic reticulum membrane [Evidence IEA];GO_function: GO:0061630 - ubiquitin protein ligase activity [Evidence IEA];GO_function: GO:0031624 - ubiquitin conjugating enzyme binding [Evidence IEA];GO_process: GO:0000209 - protein polyubiquitination [Evidence IEA];GO_process: GO:0042428 - serotonin metabolic process [Evidence IEA];GO_process: GO:0042415 - norepinephrin…
FUN_000381	FUN_000381-T1	mRNA	scaffold_1	7632837	7676735	-	TDRD12_1	Tdrd12p		3.6.4.13	1195at6447	PF00567;PF04969	IPR002999 Tudor domain;IPR007052 CS domain;IPR008978 HSP20-like chaperone;IPR011989 Armadillo-like helical;IPR016024 Armadillo-type fold;IPR035437 SNase-like, OB-fold superfamily	ENOG503BE7J	A:(A) RNA processing and modification	GO_process: GO:0042078 - germ-line stem cell division [Evidence IEA]
FUN_000382	FUN_000382-T1	mRNA	scaffold_1	7677559	7694171	-	CHTF18	Chromosome transmission fidelity protein 18					IPR011545 DEAD/DEAH box helicase domain;IPR027417 P-loop containing nucleoside triphosphate hydrolase	ENOG503BDVM	O:(O) Posttranslational modification, protein turnover, chaperones	GO_function: GO:0005524 - ATP binding [Evidence IEA];GO_function: GO:0003676 - nucleic acid binding [Evidence IEA];GO_process: GO:0042078 - germ-line stem cell division [Evidence IEA]
FUN_000384	FUN_000384-T1	mRNA	scaffold_1	7700426	7702234	-		hypothetical protein
FUN_000389	FUN_000389-T1	mRNA	scaffold_1	7767856	7796720	-		hypothetical protein		2.3.2.13		PF00927;PF01841	IPR001304 C-type lectin-like;IPR002931 Transglutaminase-like;IPR008958 Transglutaminase, C-terminal;IPR013783 Immunoglobulin-like fold;IPR013808 Transglutaminase, active site;IPR016187 C-type lectin fold;IPR029903 RmlD-like substrate binding domain;IPR036238 Transglutaminase, C-terminal domain superfamily;IPR036291 NAD(P)-binding domain superfamily;IPR036985 Transglutaminase-like superfamily;IPR0…	ENOG503B9AA	S:(S) Function unknown	GO_function: GO:0003810 - protein-glutamine gamma-glutamyltransferase activity [Evidence IEA];GO_process: GO:0018149 - peptide cross-linking [Evidence IEA]			C111
FUN_000390	FUN_000390-T1	mRNA	scaffold_1	7798413	7803540	-	TGM3_2	Transglutaminase/protease-like ues		2.3.2.13		PF00868	IPR001102 Transglutaminase, N-terminal;IPR013783 Immunoglobulin-like fold;IPR014756 Immunoglobulin E-set;IPR050779 Protein-glutamine gamma-glutamyltransferases	ENOG503BJ8W	S:(S) Function unknown	GO_function: GO:0003810 - protein-glutamine gamma-glutamyltransferase activity [Evidence IEA];GO_process: GO:0018149 - peptide cross-linking [Evidence IEA]			C111
FUN_000396	FUN_000396-T1	mRNA	scaffold_1	7822422	7832924	+		hypothetical protein
FUN_000397	FUN_000397-T1	mRNA	scaffold_1	7836129	8320682	+		hypothetical protein			1448at6447	PF00571;PF00654	IPR000644 CBS domain;IPR001807 Chloride channel;IPR014743 Chloride channel, core;IPR046342 CBS domain superfamily;IPR051280 Voltage-gated chloride channel/antiporter	ENOG503BHC6	P:(P) Inorganic ion transport and metabolism	GO_component: GO:0016020 - membrane [Evidence IEA];GO_component: GO:0043231 - intracellular membrane-bounded organelle [Evidence IEA];GO_function: GO:0015108 - chloride transmembrane transporter activity [Evidence IEA];GO_process: GO:0055085 - transmembrane transport [Evidence IEA];GO_process: GO:0006821 - chloride transport [Evidence IEA]
FUN_094527	FUN_094527-T1	mRNA	scaffold_1	8053912	8075487	+		hypothetical protein				PF00651	IPR000210 BTB/POZ domain;IPR011333 SKP1/BTB/POZ domain superfamily	ENOG503B98J	T:(T) Signal transduction mechanisms	GO_function: GO:0005515 - protein binding [Evidence IEA]
FUN_000400	FUN_000400-T1	mRNA	scaffold_1	8348739	8351125	-		hypothetical protein
FUN_000401	FUN_000401-T1	mRNA	scaffold_1	8361278	8362234	-		hypothetical protein
FUN_000402	FUN_000402-T1	mRNA	scaffold_1	8362270	8390797	+		hypothetical protein			1448at6447	PF00571;PF00654	IPR000644 CBS domain;IPR001807 Chloride channel;IPR014743 Chloride channel, core;IPR046342 CBS domain superfamily;IPR051280 Voltage-gated chloride channel/antiporter	ENOG503BHC6	P:(P) Inorganic ion transport and metabolism	GO_component: GO:0016020 - membrane [Evidence IEA];GO_component: GO:0043231 - intracellular membrane-bounded organelle [Evidence IEA];GO_function: GO:0015108 - chloride transmembrane transporter activity [Evidence IEA];GO_process: GO:0055085 - transmembrane transport [Evidence IEA];GO_process: GO:0006821 - chloride transport [Evidence IEA]
FUN_000404	FUN_000404-T1	mRNA	scaffold_1	8414594	8417540	+	SNAI2_1	zinc finger protein				PF00096;PF12874;PF13894;PF13912	IPR013087 Zinc finger C2H2-type;IPR036236 Zinc finger C2H2 superfamily;IPR050527 Snail/Krueppel C2H2-type Zinc-finger	ENOG503B9Z2	K:(K) Transcription	GO_function: GO:0000981 - DNA-binding transcription factor activity, RNA polymerase II-specific [Evidence IEA];GO_function: GO:0000978 - RNA polymerase II cis-regulatory region sequence-specific DNA binding [Evidence IEA];GO_process: GO:0006355 - regulation of DNA-templated transcription [Evidence IEA]
FUN_000406	FUN_000406-T1	mRNA	scaffold_1	8429603	8430638	-		hypothetical protein
FUN_000413	FUN_000413-T1	mRNA	scaffold_1	8509314	8511999	-	SNAI2_2	Metal ion binding				PF00096;PF12874;PF13894;PF13912	IPR013087 Zinc finger C2H2-type;IPR036236 Zinc finger C2H2 superfamily;IPR050527 Snail/Krueppel C2H2-type Zinc-finger	ENOG503B9Z2	K:(K) Transcription	GO_function: GO:0000981 - DNA-binding transcription factor activity, RNA polymerase II-specific [Evidence IEA];GO_function: GO:0000978 - RNA polymerase II cis-regulatory region sequence-specific DNA binding [Evidence IEA];GO_process: GO:0006355 - regulation of DNA-templated transcription [Evidence IEA]
FUN_000422	FUN_000422-T1	mRNA	scaffold_1	8651482	8657940	+		hypothetical protein				PF00619	IPR001315 CARD domain;IPR011029 Death-like domain superfamily;IPR037939 Death domain-containing protein CRADD			GO_function: GO:0070513 - death domain binding [Evidence IEA];GO_function: GO:0002020 - protease binding [Evidence IEA];GO_process: GO:0042981 - regulation of apoptotic process [Evidence IEA]
FUN_000423	FUN_000423-T1	mRNA	scaffold_1	8663169	8665800	-	SNAI2_3	Metal ion binding				PF00096;PF12874;PF13894;PF13912	IPR013087 Zinc finger C2H2-type;IPR036236 Zinc finger C2H2 superfamily;IPR050527 Snail/Krueppel C2H2-type Zinc-finger	ENOG503B9Z2	K:(K) Transcription	GO_function: GO:0000981 - DNA-binding transcription factor activity, RNA polymerase II-specific [Evidence IEA];GO_function: GO:0000978 - RNA polymerase II cis-regulatory region sequence-specific DNA binding [Evidence IEA];GO_process: GO:0006355 - regulation of DNA-templated transcription [Evidence IEA]
FUN_000426	FUN_000426-T1	mRNA	scaffold_1	8749407	8761100	-	ACOX3_1	acyl-Coenzyme A oxidase		1.3.3.6		PF00441;PF22924	IPR012258 Acyl-CoA oxidase;IPR036250 Acyl-CoA dehydrogenase-like, C-terminal;IPR046373 Acyl-CoA oxidase/dehydrogenase, middle domain superfamily;IPR055060 Acyl-CoA oxidase, C-alpha1 domain	ENOG503B9Y8	I:(I) Lipid transport and metabolism;Q:(Q) Secondary metabolites biosynthesis, transport and catabolism	GO_component: GO:0005777 - peroxisome [Evidence IEA];GO_function: GO:0071949 - FAD binding [Evidence IEA];GO_function: GO:0050660 - flavin adenine dinucleotide binding [Evidence IEA];GO_function: GO:0005504 - fatty acid binding [Evidence IEA];GO_function: GO:0016627 - oxidoreductase activity, acting on the CH-CH group of donors [Evidence IEA];GO_function: GO:0003997 - acyl-CoA oxidase activity [E…
FUN_000428	FUN_000428-T1	mRNA	scaffold_1	8802357	8803093	+		hypothetical protein
FUN_000429	FUN_000429-T1	mRNA	scaffold_1	8807876	8813534	+		hypothetical protein				PF10283	IPR019406 Aprataxin and PNK-like factor, PBZ domain	ENOG503BVND	L:(L) Replication, recombination and repair
FUN_000432	FUN_000432-T1	mRNA	scaffold_1	8842105	8843886	+		hypothetical protein
FUN_000433	FUN_000433-T1	mRNA	scaffold_1	8843899	8845449	+		hypothetical protein				PF03318	IPR004991 Aerolysin-like toxin
FUN_000435	FUN_000435-T1	mRNA	scaffold_1	8856417	8858542	+		hypothetical protein
FUN_000436	FUN_000436-T1	mRNA	scaffold_1	8860515	8870998	+		hypothetical protein			3098at6447	PF01068;PF10283;PF14743	IPR007527 Zinc finger, SWIM-type;IPR012310 DNA ligase, ATP-dependent, central;IPR012340 Nucleic acid-binding, OB-fold;IPR016059 DNA ligase, ATP-dependent, conserved site;IPR019406 Aprataxin and PNK-like factor, PBZ domain;IPR029319 DNA ligase, OB-like domain;IPR050326 NAD-dependent DNA ligase B	ENOG503BVND	L:(L) Replication, recombination and repair	GO_function: GO:0003909 - DNA ligase activity [Evidence IEA];GO_function: GO:0005524 - ATP binding [Evidence IEA];GO_function: GO:0008270 - zinc ion binding [Evidence IEA];GO_function: GO:0003910 - DNA ligase (ATP) activity [Evidence IEA];GO_process: GO:0006281 - DNA repair [Evidence IEA];GO_process: GO:0006310 - DNA recombination [Evidence IEA]
FUN_000438	FUN_000438-T1	mRNA	scaffold_1	8879583	8883827	-		hypothetical protein			10504at6447	PF04421	IPR007515 Mss4;IPR011057 Mss4-like superfamily;IPR011323 Mss4/translationally controlled tumour-associated TCTP	ENOG503BSM3	T:(T) Signal transduction mechanisms;U:(U) Intracellular trafficking, secretion, and vesicular transport	GO_component: GO:0016020 - membrane [Evidence IEA];GO_component: GO:0005829 - cytosol [Evidence IEA];GO_function: GO:0005085 - guanyl-nucleotide exchange factor activity [Evidence IEA];GO_function: GO:0008270 - zinc ion binding [Evidence IEA];GO_process: GO:0006892 - post-Golgi vesicle-mediated transport [Evidence IEA];GO_process: GO:0007264 - small GTPase-mediated signal transduction [Evidence I…
FUN_000439	FUN_000439-T1	mRNA	scaffold_1	8888014	8892228	+		hypothetical protein				PF10187	IPR019331 FAM192A/Fyv6, N-terminal;IPR039845 PSME3-interacting protein	ENOG503BM7H	S:(S) Function unknown	GO_component: GO:0005634 - nucleus [Evidence IEA]
FUN_000440	FUN_000440-T1	mRNA	scaffold_1	8914749	8915680	-		hypothetical protein
FUN_000444	FUN_000444-T1	mRNA	scaffold_1	9009431	9010950	+		hypothetical protein
FUN_000448	FUN_000448-T1	mRNA	scaffold_1	9103808	9106189	-		hypothetical protein			10504at6447	PF04421	IPR007515 Mss4;IPR011057 Mss4-like superfamily;IPR011323 Mss4/translationally controlled tumour-associated TCTP	ENOG503BSM3	T:(T) Signal transduction mechanisms;U:(U) Intracellular trafficking, secretion, and vesicular transport	GO_component: GO:0016020 - membrane [Evidence IEA];GO_component: GO:0005829 - cytosol [Evidence IEA];GO_function: GO:0005085 - guanyl-nucleotide exchange factor activity [Evidence IEA];GO_function: GO:0008270 - zinc ion binding [Evidence IEA];GO_process: GO:0006892 - post-Golgi vesicle-mediated transport [Evidence IEA];GO_process: GO:0007264 - small GTPase-mediated signal transduction [Evidence I…
FUN_000450	FUN_000450-T1	mRNA	scaffold_1	9135736	9140547	-		hypothetical protein					IPR000757 Glycoside hydrolase family 16;IPR013320 Concanavalin A-like lectin/glucanase domain superfamily;IPR050546 Glycosyl Hydrolase Family 16	ENOG50248GW	G:(G) Carbohydrate transport and metabolism	GO_function: GO:0004553 - hydrolase activity, hydrolyzing O-glycosyl compounds [Evidence IEA];GO_process: GO:0005975 - carbohydrate metabolic process [Evidence IEA]				GH16
FUN_000451	FUN_000451-T1	mRNA	scaffold_1	9341296	9386990	-	crml-1	CARMIL C-terminus				PF16000	IPR031943 CARMIL, C-terminal domain	ENOG503BE1G	N:(N) Cell motility
FUN_000452	FUN_000452-T1	mRNA	scaffold_1	9387262	9464264	-	LRRC16A_1	barbed-end actin filament uncapping			1633at6447	PF17888	IPR011993 PH-like domain superfamily;IPR032675 Leucine-rich repeat domain superfamily;IPR041245 CARMIL, pleckstrin homology domain;IPR051279 Protein Phosphatase 1 Regulatory and Actin Interaction Protein	ENOG503BE1G	N:(N) Cell motility	GO_component: GO:0030027 - lamellipodium [Evidence IEA];GO_component: GO:0005886 - plasma membrane [Evidence IEA];GO_process: GO:0034315 - regulation of Arp2/3 complex-mediated actin nucleation [Evidence IEA];GO_process: GO:0016477 - cell migration [Evidence IEA]
FUN_000452	FUN_000452-T2	mRNA	scaffold_1	9387262	9464264	-	LRRC16A_1	barbed-end actin filament uncapping, variant 2				PF13516	IPR001611 Leucine-rich repeat;IPR032675 Leucine-rich repeat domain superfamily;IPR051279 Protein Phosphatase 1 Regulatory and Actin Interaction Protein	ENOG503BE1G	N:(N) Cell motility	GO_component: GO:0030027 - lamellipodium [Evidence IEA];GO_component: GO:0005886 - plasma membrane [Evidence IEA];GO_function: GO:0005515 - protein binding [Evidence IEA];GO_process: GO:0034315 - regulation of Arp2/3 complex-mediated actin nucleation [Evidence IEA];GO_process: GO:0016477 - cell migration [Evidence IEA]
FUN_000453	FUN_000453-T1	mRNA	scaffold_1	9491939	9493766	+		hypothetical protein
FUN_000454	FUN_000454-T1	mRNA	scaffold_1	9497182	9497899	+		hypothetical protein
FUN_000455	FUN_000455-T1	mRNA	scaffold_1	9505972	9520083	-	TMEM55A_1	phosphatidylinositol-4,5-bisphosphate 4-phosphatase activity		3.1.3.78	9087at6447	PF09788	IPR019178 Phosphatidylinositol 4,5-bisphosphate 4-phosphatase	ENOG503BFDR	S:(S) Function unknown	GO_component: GO:0031902 - late endosome membrane [Evidence IEA];GO_component: GO:0030670 - phagocytic vesicle membrane [Evidence IEA];GO_component: GO:0005765 - lysosomal membrane [Evidence IEA];GO_component: GO:0005886 - plasma membrane [Evidence IEA];GO_function: GO:0034597 - phosphatidylinositol-4,5-bisphosphate 4-phosphatase activity [Evidence IEA];GO_process: GO:0046856 - phosphatidylinosit…
FUN_000456	FUN_000456-T1	mRNA	scaffold_1	9535929	9538622	+		hypothetical protein					IPR029063 S-adenosyl-L-methionine-dependent methyltransferase superfamily
FUN_000457	FUN_000457-T1	mRNA	scaffold_1	9538749	9541834	+	WBSCR27_1	ubiE/COQ5 methyltransferase					IPR029063 S-adenosyl-L-methionine-dependent methyltransferase superfamily	ENOG503BKKG	Q:(Q) Secondary metabolites biosynthesis, transport and catabolism
FUN_000459	FUN_000459-T1	mRNA	scaffold_1	9611303	9614191	+		hypothetical protein					IPR029063 S-adenosyl-L-methionine-dependent methyltransferase superfamily
FUN_000460	FUN_000460-T1	mRNA	scaffold_1	9631413	9653828	+	WBSCR27_2	ubiE/COQ5 methyltransferase				PF01209;PF08241;PF13489;PF13649;PF13847	IPR029063 S-adenosyl-L-methionine-dependent methyltransferase superfamily;IPR041698 Methyltransferase domain 25	ENOG503BKKG	Q:(Q) Secondary metabolites biosynthesis, transport and catabolism
FUN_000461	FUN_000461-T1	mRNA	scaffold_1	9698130	9704409	-		hypothetical protein
FUN_000462	FUN_000462-T1	mRNA	scaffold_1	9715048	9715594	-		hypothetical protein
FUN_000464	FUN_000464-T1	mRNA	scaffold_1	9737621	9747754	+	COL6A6_1	biological adhesion				PF00008;PF00092;PF13519	IPR000742 EGF-like domain;IPR001881 EGF-like calcium-binding domain;IPR002035 von Willebrand factor, type A;IPR036465 von Willebrand factor A-like domain superfamily;IPR050525 Extracellular Matrix Assembly and Organization	ENOG503BA28	W:(W) Extracellular structures	GO_function: GO:0005509 - calcium ion binding [Evidence IEA]
FUN_000465	FUN_000465-T1	mRNA	scaffold_1	9753102	9759590	-	SAC3D1_1	SAC3/GANP					IPR005062 SAC3/GANP/THP3, conserved domain;IPR045107 SAC3/GANP/THP3	ENOG503BMVB	D:(D) Cell cycle control, cell division, chromosome partitioning;U:(U) Intracellular trafficking, secretion, and vesicular transport	GO_component: GO:0005819 - spindle [Evidence IEA];GO_component: GO:0005813 - centrosome [Evidence IEA];GO_component: GO:0005634 - nucleus [Evidence IEA];GO_process: GO:0051225 - spindle assembly [Evidence IEA];GO_process: GO:0051298 - centrosome duplication [Evidence IEA]
FUN_000466	FUN_000466-T1	mRNA	scaffold_1	9832734	9841595	+		hypothetical protein
FUN_000467	FUN_000467-T1	mRNA	scaffold_1	9848499	9857954	+		hypothetical protein
FUN_000468	FUN_000468-T1	mRNA	scaffold_1	9858605	9877128	-		hypothetical protein
FUN_000468	FUN_000468-T2	mRNA	scaffold_1	9858605	9877128	-		hypothetical protein
FUN_000469	FUN_000469-T1	mRNA	scaffold_1	9897932	9932036	-	LRRC16A_3	barbed-end actin filament uncapping				PF13516	IPR001611 Leucine-rich repeat;IPR031943 CARMIL, C-terminal domain;IPR032675 Leucine-rich repeat domain superfamily;IPR051279 Protein Phosphatase 1 Regulatory and Actin Interaction Protein	ENOG503BE1G	N:(N) Cell motility	GO_component: GO:0030027 - lamellipodium [Evidence IEA];GO_component: GO:0005886 - plasma membrane [Evidence IEA];GO_function: GO:0005515 - protein binding [Evidence IEA];GO_process: GO:0034315 - regulation of Arp2/3 complex-mediated actin nucleation [Evidence IEA];GO_process: GO:0016477 - cell migration [Evidence IEA]
FUN_000470	FUN_000470-T1	mRNA	scaffold_1	9993275	10010004	-	RPRD1B_1	Regulation of nuclear pre-mRNA domain containing protein 1B			6479at6447	PF04818;PF16566	IPR006569 CID domain;IPR008942 ENTH/VHS;IPR032337 RPRD1A/B, C-terminal domain	ENOG503B9Z7	A:(A) RNA processing and modification	GO_function: GO:0000993 - RNA polymerase II complex binding [Evidence IEA];GO_process: GO:0031124 - mRNA 3'-end processing [Evidence IEA]
FUN_000471	FUN_000471-T1	mRNA	scaffold_1	10010323	10027386	+	POLR2C_1	DNA-directed RNA polymerase II subunit RPB3			5034at6447	PF01000;PF01193	IPR001514 DNA-directed RNA polymerase, 30-40kDa subunit, conserved site;IPR011262 DNA-directed RNA polymerase, insert domain;IPR011263 DNA-directed RNA polymerase, RpoA/D/Rpb3-type;IPR036603 RNA polymerase, RBP11-like subunit;IPR036643 DNA-directed RNA polymerase, insert domain superfamily;IPR050518 Archaeal Rpo3/Eukaryotic RPB3 RNA Polymerase Subunit	ENOG503B94M	K:(K) Transcription	GO_component: GO:0005665 - RNA polymerase II, core complex [Evidence IEA];GO_function: GO:0046983 - protein dimerization activity [Evidence IEA];GO_function: GO:0003677 - DNA binding [Evidence IEA];GO_function: GO:0001055 - obsolete RNA polymerase II activity [Evidence IEA];GO_function: GO:0003899 - DNA-directed 5'-3' RNA polymerase activity [Evidence IEA];GO_process: GO:0006366 - transcription b…
FUN_000473	FUN_000473-T1	mRNA	scaffold_1	10035945	10039538	+		hypothetical protein				PF20720	IPR027417 P-loop containing nucleoside triphosphate hydrolase;IPR049050 Novel STAND NTPase 3
FUN_000475	FUN_000475-T1	mRNA	scaffold_1	10065490	10066568	-	POLR2C_2	DNA-directed RNA polymerase II subunit RPB3				PF01193	IPR011263 DNA-directed RNA polymerase, RpoA/D/Rpb3-type;IPR036603 RNA polymerase, RBP11-like subunit	ENOG503B94M	K:(K) Transcription	GO_function: GO:0046983 - protein dimerization activity [Evidence IEA];GO_function: GO:0003899 - DNA-directed 5'-3' RNA polymerase activity [Evidence IEA];GO_process: GO:0006351 - DNA-templated transcription [Evidence IEA]
FUN_000476	FUN_000476-T1	mRNA	scaffold_1	10093999	10102896	+	RPRD1B_2	Regulation of nuclear pre-mRNA domain containing protein 1B				PF04818;PF16566	IPR006569 CID domain;IPR008942 ENTH/VHS;IPR032337 RPRD1A/B, C-terminal domain	ENOG503B9Z7	A:(A) RNA processing and modification	GO_function: GO:0000993 - RNA polymerase II complex binding [Evidence IEA];GO_process: GO:0031124 - mRNA 3'-end processing [Evidence IEA]
FUN_000477	FUN_000477-T1	mRNA	scaffold_1	10113223	10253511	+	AARS1	Alanine--tRNA ligase, cytoplasmic, variant 2		6.1.1.7	665at6447	PF01411;PF02272;PF07973	IPR002318 Alanine-tRNA ligase, class IIc;IPR003156 DHHA1 domain;IPR009000 Translation protein, beta-barrel domain superfamily;IPR012947 Threonyl/alanyl tRNA synthetase, SAD;IPR018162 Alanine-tRNA ligase, class IIc, anti-codon-binding domain superfamily;IPR018163 Threonyl/alanyl tRNA synthetase, class II-like, putative editing domain superfamily;IPR018164 Alanyl-tRNA synthetase, class IIc, N-termi…	ENOG503BDN7	J:(J) Translation, ribosomal structure and biogenesis	GO_component: GO:0005737 - cytoplasm [Evidence IEA];GO_component: GO:0005739 - mitochondrion [Evidence IEA];GO_function: GO:0004813 - alanine-tRNA ligase activity [Evidence IEA];GO_function: GO:0003676 - nucleic acid binding [Evidence IEA];GO_function: GO:0002161 - aminoacyl-tRNA editing activity [Evidence IEA];GO_function: GO:0005524 - ATP binding [Evidence IEA];GO_function: GO:0004812 - aminoac…
FUN_000477	FUN_000477-T2	mRNA	scaffold_1	10113223	10253511	+	AARS1	Alanine--tRNA ligase, cytoplasmic		6.1.1.7	665at6447	PF01411;PF02272;PF07973	IPR002318 Alanine-tRNA ligase, class IIc;IPR003156 DHHA1 domain;IPR009000 Translation protein, beta-barrel domain superfamily;IPR012947 Threonyl/alanyl tRNA synthetase, SAD;IPR018162 Alanine-tRNA ligase, class IIc, anti-codon-binding domain superfamily;IPR018163 Threonyl/alanyl tRNA synthetase, class II-like, putative editing domain superfamily;IPR018164 Alanyl-tRNA synthetase, class IIc, N-termi…	ENOG503BDN7	J:(J) Translation, ribosomal structure and biogenesis	GO_component: GO:0005737 - cytoplasm [Evidence IEA];GO_component: GO:0005739 - mitochondrion [Evidence IEA];GO_function: GO:0004813 - alanine-tRNA ligase activity [Evidence IEA];GO_function: GO:0003676 - nucleic acid binding [Evidence IEA];GO_function: GO:0002161 - aminoacyl-tRNA editing activity [Evidence IEA];GO_function: GO:0005524 - ATP binding [Evidence IEA];GO_function: GO:0004812 - aminoac…
FUN_000477	FUN_000477-T3	mRNA	scaffold_1	10113223	10253511	+	AARS1	Alanine--tRNA ligase, cytoplasmic, variant 3		6.1.1.7	665at6447	PF01411;PF02272;PF07973	IPR002318 Alanine-tRNA ligase, class IIc;IPR003156 DHHA1 domain;IPR009000 Translation protein, beta-barrel domain superfamily;IPR012947 Threonyl/alanyl tRNA synthetase, SAD;IPR018162 Alanine-tRNA ligase, class IIc, anti-codon-binding domain superfamily;IPR018163 Threonyl/alanyl tRNA synthetase, class II-like, putative editing domain superfamily;IPR018164 Alanyl-tRNA synthetase, class IIc, N-termi…	ENOG503BDN7	J:(J) Translation, ribosomal structure and biogenesis	GO_component: GO:0005737 - cytoplasm [Evidence IEA];GO_component: GO:0005739 - mitochondrion [Evidence IEA];GO_function: GO:0004813 - alanine-tRNA ligase activity [Evidence IEA];GO_function: GO:0003676 - nucleic acid binding [Evidence IEA];GO_function: GO:0002161 - aminoacyl-tRNA editing activity [Evidence IEA];GO_function: GO:0005524 - ATP binding [Evidence IEA];GO_function: GO:0004812 - aminoac…
FUN_000481	FUN_000481-T1	mRNA	scaffold_1	10163603	10168969	+	ANKS6_1	Ankyrin repeat and SAM domain-containing protein 6				PF00536;PF07647	IPR001660 Sterile alpha motif domain;IPR013761 Sterile alpha motif/pointed domain superfamily	ENOG503BFN1	A:(A) RNA processing and modification	GO_component: GO:0005737 - cytoplasm [Evidence IEA];GO_function: GO:0005515 - protein binding [Evidence IEA]
FUN_000487	FUN_000487-T1	mRNA	scaffold_1	10252200	10252544	-		hypothetical protein
FUN_000488	FUN_000488-T1	mRNA	scaffold_1	10255057	10258702	-	Mrpl52	39S ribosomal protein L52			11864at6447	PF18699	IPR034596 Large ribosomal subunit protein mL52	ENOG503BTWM	J:(J) Translation, ribosomal structure and biogenesis	GO_component: GO:0005762 - mitochondrial large ribosomal subunit [Evidence IEA];GO_function: GO:0003735 - structural constituent of ribosome [Evidence IEA];GO_process: GO:0006412 - translation [Evidence IEA];GO_process: GO:0032543 - mitochondrial translation [Evidence IEA]
FUN_000490	FUN_000490-T1	mRNA	scaffold_1	10262520	10266104	+	ANKS6_2	Ankyrin repeat and SAM domain-containing protein 6				PF00023;PF13606;PF13637	IPR002110 Ankyrin repeat;IPR036770 Ankyrin repeat-containing domain superfamily	ENOG503BFN1	A:(A) RNA processing and modification	GO_function: GO:0005515 - protein binding [Evidence IEA]
FUN_000491	FUN_000491-T1	mRNA	scaffold_1	10266285	10269292	+		hypothetical protein		6.1.1.7		PF00023;PF12796	IPR002110 Ankyrin repeat;IPR036770 Ankyrin repeat-containing domain superfamily	ENOG503BDN7	J:(J) Translation, ribosomal structure and biogenesis	GO_function: GO:0005515 - protein binding [Evidence IEA]
FUN_000492	FUN_000492-T1	mRNA	scaffold_1	10272570	10273088	+		hypothetical protein				PF00023;PF12796;PF13606;PF13637	IPR002110 Ankyrin repeat;IPR036770 Ankyrin repeat-containing domain superfamily			GO_function: GO:0005515 - protein binding [Evidence IEA]
FUN_000494	FUN_000494-T1	mRNA	scaffold_1	10283317	10320152	+	ANKS6_3	Ankyrin repeat and SAM domain-containing protein 6				PF00023;PF12796;PF13606;PF13637;PF13857	IPR002110 Ankyrin repeat;IPR003439 ABC transporter-like, ATP-binding domain;IPR027417 P-loop containing nucleoside triphosphate hydrolase;IPR036770 Ankyrin repeat-containing domain superfamily	ENOG503BFN1	A:(A) RNA processing and modification	GO_function: GO:0005515 - protein binding [Evidence IEA];GO_function: GO:0005524 - ATP binding [Evidence IEA];GO_function: GO:0016887 - ATP hydrolysis activity [Evidence IEA]
FUN_000496	FUN_000496-T1	mRNA	scaffold_1	10335275	10342379	-	TLR8_1	Toll-like receptor 8					IPR000483 Cysteine-rich flanking region, C-terminal;IPR032675 Leucine-rich repeat domain superfamily	ENOG503BK5W	T:(T) Signal transduction mechanisms	GO_component: GO:0005886 - plasma membrane [Evidence IEA];GO_function: GO:0038187 - pattern recognition receptor activity [Evidence IEA];GO_process: GO:0032755 - positive regulation of interleukin-6 production [Evidence IEA];GO_process: GO:0007249 - canonical NF-kappaB signal transduction [Evidence IEA];GO_process: GO:0051607 - defense response to virus [Evidence IEA];GO_process: GO:0002224 - tol…
FUN_000497	FUN_000497-T1	mRNA	scaffold_1	10341577	10345894	+		hypothetical protein					IPR011990 Tetratricopeptide-like helical domain superfamily			GO_function: GO:0005515 - protein binding [Evidence IEA]
FUN_000499	FUN_000499-T1	mRNA	scaffold_1	10357808	10370241	-		hypothetical protein					IPR000073 Alpha/beta hydrolase fold-1;IPR029058 Alpha/Beta hydrolase fold	ENOG503B9R5	S:(S) Function unknown	GO_function: GO:0017171 - serine hydrolase activity [Evidence IEA]			S33
FUN_000501	FUN_000501-T1	mRNA	scaffold_1	10379658	10380048	-	TUBB3	Tubulin beta-3 chain					IPR002453 Beta tubulin;IPR008280 Tubulin/FtsZ, C-terminal;IPR023123 Tubulin, C-terminal	ENOG503BH8J	Z:(Z) Cytoskeleton	GO_component: GO:0005874 - microtubule [Evidence IEA];GO_function: GO:0005525 - GTP binding [Evidence IEA];GO_function: GO:0003924 - GTPase activity [Evidence IEA];GO_function: GO:0005200 - structural constituent of cytoskeleton [Evidence IEA];GO_process: GO:0007017 - microtubule-based process [Evidence IEA]
FUN_000502	FUN_000502-T1	mRNA	scaffold_1	10380095	10392983	-	TUBB4B_1	Tubulin beta-4B chain				PF00091	IPR000217 Tubulin;IPR002453 Beta tubulin;IPR003008 Tubulin/FtsZ, GTPase domain;IPR008280 Tubulin/FtsZ, C-terminal;IPR013838 Beta tubulin, autoregulation binding site;IPR017975 Tubulin, conserved site;IPR036525 Tubulin/FtsZ, GTPase domain superfamily	ENOG503BDQF	Z:(Z) Cytoskeleton	GO_component: GO:0005874 - microtubule [Evidence IEA];GO_function: GO:0005525 - GTP binding [Evidence IEA];GO_function: GO:0003924 - GTPase activity [Evidence IEA];GO_function: GO:0005200 - structural constituent of cytoskeleton [Evidence IEA];GO_process: GO:0007017 - microtubule-based process [Evidence IEA]
FUN_000505	FUN_000505-T1	mRNA	scaffold_1	10477155	10479140	-	TUBB4B_2	Tubulin beta-4B chain					IPR003008 Tubulin/FtsZ, GTPase domain;IPR013838 Beta tubulin, autoregulation binding site;IPR036525 Tubulin/FtsZ, GTPase domain superfamily	ENOG503BDQF	Z:(Z) Cytoskeleton	GO_function: GO:0005525 - GTP binding [Evidence IEA]
FUN_000506	FUN_000506-T1	mRNA	scaffold_1	10479248	10481632	-		hypothetical protein
FUN_000507	FUN_000507-T1	mRNA	scaffold_1	10496406	10549504	+	MRPL38_1	39S ribosomal protein L38, mitochondrial			6784at6447	PF01161	IPR008914 Phosphatidylethanolamine-binding protein;IPR035810 Phosphatidylethanolamine-binding protein, eukaryotic;IPR036610 PEBP-like superfamily	ENOG503BBRS	J:(J) Translation, ribosomal structure and biogenesis	GO_component: GO:0005762 - mitochondrial large ribosomal subunit [Evidence IEA]			I51
FUN_000507	FUN_000507-T2	mRNA	scaffold_1	10496406	10549504	+	MRPL38_1	39S ribosomal protein L38, mitochondrial, variant 3			6784at6447	PF01161	IPR008914 Phosphatidylethanolamine-binding protein;IPR035810 Phosphatidylethanolamine-binding protein, eukaryotic;IPR036610 PEBP-like superfamily	ENOG503BBRS	J:(J) Translation, ribosomal structure and biogenesis	GO_component: GO:0005762 - mitochondrial large ribosomal subunit [Evidence IEA]			I51
FUN_000507	FUN_000507-T3	mRNA	scaffold_1	10496406	10549504	+	MRPL38_1	39S ribosomal protein L38, mitochondrial, variant 2			6784at6447	PF01161	IPR008914 Phosphatidylethanolamine-binding protein;IPR035810 Phosphatidylethanolamine-binding protein, eukaryotic;IPR036610 PEBP-like superfamily	ENOG503BBRS	J:(J) Translation, ribosomal structure and biogenesis	GO_component: GO:0005762 - mitochondrial large ribosomal subunit [Evidence IEA]			I51
FUN_000508	FUN_000508-T1	mRNA	scaffold_1	10564382	10564762	-		hypothetical protein			11708at6447	PF07716	IPR004827 Basic-leucine zipper domain;IPR031106 CCAAT/enhancer-binding protein C/EBP;IPR046347 Basic-leucine zipper domain superfamily	ENOG503BTZC	K:(K) Transcription	GO_function: GO:0000981 - DNA-binding transcription factor activity, RNA polymerase II-specific [Evidence IEA];GO_function: GO:0000978 - RNA polymerase II cis-regulatory region sequence-specific DNA binding [Evidence IEA];GO_function: GO:0003700 - DNA-binding transcription factor activity [Evidence IEA];GO_process: GO:0006357 - regulation of transcription by RNA polymerase II [Evidence IEA];GO_pr…
FUN_000509	FUN_000509-T1	mRNA	scaffold_1	10568439	10569728	+		hypothetical protein				PF00170;PF07716	IPR004827 Basic-leucine zipper domain;IPR031106 CCAAT/enhancer-binding protein C/EBP;IPR046347 Basic-leucine zipper domain superfamily	ENOG503BN0K	K:(K) Transcription	GO_function: GO:0000981 - DNA-binding transcription factor activity, RNA polymerase II-specific [Evidence IEA];GO_function: GO:0000978 - RNA polymerase II cis-regulatory region sequence-specific DNA binding [Evidence IEA];GO_function: GO:0003700 - DNA-binding transcription factor activity [Evidence IEA];GO_process: GO:0006357 - regulation of transcription by RNA polymerase II [Evidence IEA];GO_pr…
FUN_000518	FUN_000518-T1	mRNA	scaffold_1	10659358	10675710	-		hypothetical protein				PF22494	IPR052956 Mesenchyme-associated surface protein;IPR055188 Choice-of-anchor I domain	ENOG503BTQ2
FUN_000521	FUN_000521-T1	mRNA	scaffold_1	10703871	10706942	-		hypothetical protein
FUN_000522	FUN_000522-T1	mRNA	scaffold_1	10752571	10754468	+	MACF1	Microtubule-actin cross-linking factor 1, isoforms 1/2/3/5				PF00036;PF13202;PF13405;PF13499	IPR002048 EF-hand domain;IPR011992 EF-hand domain pair;IPR018247 EF-Hand 1, calcium-binding site;IPR043197 Plakin	ENOG503BA4T	Z:(Z) Cytoskeleton	GO_component: GO:0005882 - intermediate filament [Evidence IEA];GO_component: GO:0005737 - cytoplasm [Evidence IEA];GO_component: GO:0016020 - membrane [Evidence IEA];GO_function: GO:0005509 - calcium ion binding [Evidence IEA];GO_function: GO:0005198 - structural molecule activity [Evidence IEA];GO_process: GO:0045104 - intermediate filament cytoskeleton organization [Evidence IEA];GO_process: G…
FUN_000527	FUN_000527-T1	mRNA	scaffold_1	10761170	10773565	-		hypothetical protein				PF22494	IPR052956 Mesenchyme-associated surface protein;IPR055188 Choice-of-anchor I domain	ENOG503CQ0T
FUN_000531	FUN_000531-T1	mRNA	scaffold_1	10832845	11174924	-		hypothetical protein				PF22494	IPR011044 Quinoprotein amine dehydrogenase, beta chain-like;IPR052956 Mesenchyme-associated surface protein;IPR055188 Choice-of-anchor I domain	ENOG501RXP0	S:(S) Function unknown
FUN_000534	FUN_000534-T1	mRNA	scaffold_1	11222691	11268866	-		hypothetical protein		3.5.2.9	260at6447	PF01968	IPR002821 Hydantoinase A/oxoprolinase;IPR003692 Hydantoinase B/oxoprolinase;IPR008040 Hydantoinase/oxoprolinase, N-terminal;IPR045079 Oxoprolinase-like;IPR049517 Acetophenone carboxylase-like, C-terminal domain	ENOG503BHEN	E:(E) Amino acid transport and metabolism	GO_component: GO:0005829 - cytosol [Evidence IEA];GO_function: GO:0016787 - hydrolase activity [Evidence IEA];GO_function: GO:0003824 - catalytic activity [Evidence IEA];GO_function: GO:0017168 - 5-oxoprolinase (ATP-hydrolyzing) activity [Evidence IEA];GO_process: GO:0006749 - glutathione metabolic process [Evidence IEA]
FUN_000535	FUN_000535-T1	mRNA	scaffold_1	11276230	11277393	+	EXOSC4_1	Exosome complex component RRP41				PF01138;PF03725	IPR001247 Exoribonuclease, phosphorolytic domain 1;IPR015847 Exoribonuclease, phosphorolytic domain 2;IPR020568 Ribosomal protein uS5 domain 2-type superfamily;IPR027408 PNPase/RNase PH domain superfamily;IPR036345 Exoribonuclease, PH domain 2 superfamily;IPR050080 Ribonuclease PH	ENOG503BDXK	J:(J) Translation, ribosomal structure and biogenesis	GO_component: GO:0000177 - cytoplasmic exosome (RNase complex) [Evidence IEA];GO_component: GO:0005730 - nucleolus [Evidence IEA];GO_component: GO:0000176 - nuclear exosome (RNase complex) [Evidence IEA];GO_function: GO:0003723 - RNA binding [Evidence IEA];GO_process: GO:0016075 - rRNA catabolic process [Evidence IEA];GO_process: GO:0034427 - obsolete nuclear-transcribed mRNA catabolic process, e…
FUN_000536	FUN_000536-T1	mRNA	scaffold_1	11280428	11284483	-		hypothetical protein
FUN_000550	FUN_000550-T1	mRNA	scaffold_1	11286436	11599481	-		hypothetical protein			453at6447	PF00400	IPR001680 WD40 repeat;IPR015943 WD40/YVTN repeat-like-containing domain superfamily;IPR019775 WD40 repeat, conserved site;IPR020472 G-protein beta WD-40 repeat;IPR036322 WD40-repeat-containing domain superfamily	ENOG503BGRJ	S:(S) Function unknown	GO_function: GO:0005515 - protein binding [Evidence IEA]
FUN_000537	FUN_000537-T1	mRNA	scaffold_1	11288407	11330996	-		hypothetical protein				PF00400	IPR001680 WD40 repeat;IPR015943 WD40/YVTN repeat-like-containing domain superfamily;IPR036322 WD40-repeat-containing domain superfamily	ENOG503BGRJ	S:(S) Function unknown	GO_function: GO:0005515 - protein binding [Evidence IEA]
FUN_000538	FUN_000538-T1	mRNA	scaffold_1	11346549	11353080	+	TBX20_1	T-box transcription factor tbx20					IPR036960 T-box superfamily;IPR046360 T-box transcription factor, DNA-binding domain	ENOG503BBR1	K:(K) Transcription	GO_component: GO:0005634 - nucleus [Evidence IEA];GO_function: GO:0003700 - DNA-binding transcription factor activity [Evidence IEA];GO_process: GO:0006355 - regulation of DNA-templated transcription [Evidence IEA];GO_process: GO:0045893 - positive regulation of DNA-templated transcription [Evidence IEA]
FUN_000539	FUN_000539-T1	mRNA	scaffold_1	11354902	11362753	-		hypothetical protein				PF00057;PF00431	IPR000859 CUB domain;IPR002172 Low-density lipoprotein (LDL) receptor class A repeat;IPR035914 Spermadhesin, CUB domain superfamily;IPR036055 LDL receptor-like superfamily;IPR050685 Low-density lipoprotein receptor	ENOG503BUEB	S:(S) Function unknown	GO_component: GO:0005886 - plasma membrane [Evidence IEA];GO_function: GO:0005515 - protein binding [Evidence IEA]
FUN_000540	FUN_000540-T1	mRNA	scaffold_1	11369039	11377934	-		hypothetical protein			5701at6447	PF02544;PF06966	IPR010721 Probable O-methyltransferase UstE-like	ENOG503BFXD	S:(S) Function unknown	GO_component: GO:0016020 - membrane [Evidence IEA]
FUN_000541	FUN_000541-T1	mRNA	scaffold_1	11380070	11391863	+	KDM8	Lysine-specific demethylase 8		1.14.11.27	6298at6447	PF08007;PF13621;PF24472	IPR003347 JmjC domain;IPR041667 Cupin-like domain 8;IPR056520 KDM8, N-terminal	ENOG503B9PX	B:(B) Chromatin structure and dynamics;T:(T) Signal transduction mechanisms	GO_component: GO:0005634 - nucleus [Evidence IEA];GO_function: GO:0051864 - histone H3K36 demethylase activity [Evidence IEA]
FUN_000542	FUN_000542-T1	mRNA	scaffold_1	11395605	11396199	-		hypothetical protein					IPR001254 Serine proteases, trypsin domain;IPR009003 Peptidase S1, PA clan;IPR043504 Peptidase S1, PA clan, chymotrypsin-like fold	ENOG503BDTB	E:(E) Amino acid transport and metabolism	GO_function: GO:0004252 - serine-type endopeptidase activity [Evidence IEA];GO_process: GO:0006508 - proteolysis [Evidence IEA]			S01A
FUN_000543	FUN_000543-T1	mRNA	scaffold_1	11396238	11426887	-	KLKB1_1	Plasma kallikrein				PF00089;PF00090	IPR000884 Thrombospondin type-1 (TSP1) repeat;IPR001254 Serine proteases, trypsin domain;IPR001314 Peptidase S1A, chymotrypsin family;IPR001763 Rhodanese-like domain;IPR009003 Peptidase S1, PA clan;IPR018114 Serine proteases, trypsin family, histidine active site;IPR033116 Serine proteases, trypsin family, serine active site;IPR036383 Thrombospondin type-1 (TSP1) repeat superfamily;IPR043504 Pept…	ENOG503BJ16	E:(E) Amino acid transport and metabolism	GO_function: GO:0004252 - serine-type endopeptidase activity [Evidence IEA];GO_process: GO:0006508 - proteolysis [Evidence IEA]			S01A
FUN_000553	FUN_000553-T1	mRNA	scaffold_1	11511191	11514061	-		hypothetical protein
FUN_000554	FUN_000554-T1	mRNA	scaffold_1	11514116	11597110	-		hypothetical protein			453at6447	PF00400	IPR001680 WD40 repeat;IPR011047 Quinoprotein alcohol dehydrogenase-like superfamily;IPR015943 WD40/YVTN repeat-like-containing domain superfamily;IPR019775 WD40 repeat, conserved site;IPR020472 G-protein beta WD-40 repeat	ENOG503BGRJ	S:(S) Function unknown	GO_function: GO:0005515 - protein binding [Evidence IEA]
FUN_000554	FUN_000554-T2	mRNA	scaffold_1	11514116	11597110	-		hypothetical protein			453at6447	PF00400	IPR001680 WD40 repeat;IPR011047 Quinoprotein alcohol dehydrogenase-like superfamily;IPR015943 WD40/YVTN repeat-like-containing domain superfamily;IPR019775 WD40 repeat, conserved site;IPR020472 G-protein beta WD-40 repeat	ENOG503BGRJ	S:(S) Function unknown	GO_function: GO:0005515 - protein binding [Evidence IEA]
FUN_000555	FUN_000555-T1	mRNA	scaffold_1	11617232	11618920	-		hypothetical protein
FUN_000556	FUN_000556-T1	mRNA	scaffold_1	11626261	11630318	+		hypothetical protein
FUN_000560	FUN_000560-T1	mRNA	scaffold_1	11637277	11639540	+		hypothetical protein
FUN_000562	FUN_000562-T1	mRNA	scaffold_1	11660076	11681616	+	TBX20_2	T-box transcription factor tbx20				PF00907	IPR001699 T-box transcription factor;IPR008967 p53-like transcription factor, DNA-binding domain superfamily;IPR018186 Transcription factor, T-box, conserved site;IPR036960 T-box superfamily;IPR046360 T-box transcription factor, DNA-binding domain	ENOG503BBR1	K:(K) Transcription	GO_component: GO:0005634 - nucleus [Evidence IEA];GO_component: GO:0000785 - chromatin [Evidence IEA];GO_function: GO:0000981 - DNA-binding transcription factor activity, RNA polymerase II-specific [Evidence IEA];GO_function: GO:0000978 - RNA polymerase II cis-regulatory region sequence-specific DNA binding [Evidence IEA];GO_function: GO:0003700 - DNA-binding transcription factor activity [Eviden…
FUN_000563	FUN_000563-T1	mRNA	scaffold_1	11685262	11687203	+		hypothetical protein
FUN_000564	FUN_000564-T1	mRNA	scaffold_1	11688250	11688689	-		hypothetical protein
FUN_000565	FUN_000565-T1	mRNA	scaffold_1	11699815	11700514	-		hypothetical protein
FUN_000571	FUN_000571-T1	mRNA	scaffold_1	11793007	11827680	+	TBX20_3	T-box transcription factor tbx20				PF00907	IPR001699 T-box transcription factor;IPR008967 p53-like transcription factor, DNA-binding domain superfamily;IPR018186 Transcription factor, T-box, conserved site;IPR036960 T-box superfamily;IPR046360 T-box transcription factor, DNA-binding domain	ENOG503BBR1	K:(K) Transcription	GO_component: GO:0005634 - nucleus [Evidence IEA];GO_component: GO:0000785 - chromatin [Evidence IEA];GO_function: GO:0000981 - DNA-binding transcription factor activity, RNA polymerase II-specific [Evidence IEA];GO_function: GO:0000978 - RNA polymerase II cis-regulatory region sequence-specific DNA binding [Evidence IEA];GO_function: GO:0003700 - DNA-binding transcription factor activity [Eviden…
FUN_000577	FUN_000577-T1	mRNA	scaffold_1	11870419	11876176	-		hypothetical protein				PF00023;PF12796;PF13606;PF13637;PF13857	IPR002110 Ankyrin repeat;IPR036770 Ankyrin repeat-containing domain superfamily	ENOG503BM8A	S:(S) Function unknown	GO_function: GO:0005515 - protein binding [Evidence IEA]
FUN_000579	FUN_000579-T1	mRNA	scaffold_1	11879497	11881878	-		hypothetical protein
FUN_000582	FUN_000582-T1	mRNA	scaffold_1	11902016	11920269	-	SH3PXD2B_1	SH3 and PX domain-containing protein 2B				PF00787	IPR001683 Phox homology;IPR036871 PX domain superfamily;IPR051228 NADPH Oxidase and PX Domain-Containing	ENOG503CNVE	T:(T) Signal transduction mechanisms	GO_component: GO:0005737 - cytoplasm [Evidence IEA];GO_function: GO:0016176 - superoxide-generating NADPH oxidase activator activity [Evidence IEA];GO_function: GO:0035091 - phosphatidylinositol binding [Evidence IEA];GO_process: GO:0042554 - superoxide anion generation [Evidence IEA]
FUN_000583	FUN_000583-T1	mRNA	scaffold_1	11924623	11952311	-	LARS2_1	putative leucine--tRNA ligase, mitochondrial		6.1.1.4		PF08264	IPR001412 Aminoacyl-tRNA synthetase, class I, conserved site;IPR002302 Leucine-tRNA ligase;IPR009008 Valyl/Leucyl/Isoleucyl-tRNA synthetase, editing domain;IPR009080 Aminoacyl-tRNA synthetase, class Ia, anticodon-binding;IPR013155 Methionyl/Valyl/Leucyl/Isoleucyl-tRNA synthetase, anticodon-binding;IPR014729 Rossmann-like alpha/beta/alpha sandwich fold;IPR015413 Methionyl/Leucyl tRNA synthetase;IP…	ENOG503BA6R	J:(J) Translation, ribosomal structure and biogenesis	GO_component: GO:0005739 - mitochondrion [Evidence IEA];GO_function: GO:0002161 - aminoacyl-tRNA editing activity [Evidence IEA];GO_function: GO:0004812 - aminoacyl-tRNA ligase activity [Evidence IEA];GO_function: GO:0005524 - ATP binding [Evidence IEA];GO_function: GO:0004823 - leucine-tRNA ligase activity [Evidence IEA];GO_function: GO:0000166 - nucleotide binding [Evidence IEA];GO_process: GO:…
FUN_000584	FUN_000584-T1	mRNA	scaffold_1	11952603	12001776	+		hypothetical protein			8258at6447	PF00498;PF08599;PF16508;PF16770	IPR000253 Forkhead-associated (FHA) domain;IPR001357 BRCT domain;IPR008984 SMAD/FHA domain superfamily;IPR013908 Nibrin, C-terminal;IPR032429 Nibrin, second BRCT domain;IPR036420 BRCT domain superfamily;IPR040227 Nibrin-related;IPR043014 Nibrin, second BRCT domain superfamily	ENOG503CB75	L:(L) Replication, recombination and repair	GO_component: GO:0030870 - Mre11 complex [Evidence IEA];GO_function: GO:0003684 - damaged DNA binding [Evidence IEA];GO_function: GO:0005515 - protein binding [Evidence IEA];GO_process: GO:0032508 - obsolete DNA duplex unwinding [Evidence IEA];GO_process: GO:0000724 - double-strand break repair via homologous recombination [Evidence IEA];GO_process: GO:0007095 - mitotic G2 DNA damage checkpoint s…
FUN_000586	FUN_000586-T1	mRNA	scaffold_1	12007957	12032169	+		hypothetical protein		3.1.1.5	4369at6447	PF02450	IPR003386 Lecithin:cholesterol/phospholipid:diacylglycerol acyltransferase;IPR029058 Alpha/Beta hydrolase fold	ENOG503BDIK	I:(I) Lipid transport and metabolism	GO_function: GO:0008374 - O-acyltransferase activity [Evidence IEA];GO_process: GO:0006629 - lipid metabolic process [Evidence IEA]
FUN_000587	FUN_000587-T1	mRNA	scaffold_1	12033865	12051155	+		hypothetical protein		2.7.11.1		PF00023;PF12796	IPR000719 Protein kinase domain;IPR002110 Ankyrin repeat;IPR011009 Protein kinase-like domain superfamily;IPR036770 Ankyrin repeat-containing domain superfamily	ENOG503BCYF	T:(T) Signal transduction mechanisms	GO_function: GO:0005515 - protein binding [Evidence IEA];GO_function: GO:0005524 - ATP binding [Evidence IEA];GO_function: GO:0004672 - protein kinase activity [Evidence IEA];GO_process: GO:0006468 - protein phosphorylation [Evidence IEA]
FUN_000588	FUN_000588-T1	mRNA	scaffold_1	12051864	12059269	+		hypothetical protein		2.7.11.1			IPR000719 Protein kinase domain;IPR011009 Protein kinase-like domain superfamily;IPR045133 Serine/threonine-protein kinase/endoribonuclease IRE1/2-like	ENOG503BCYF	T:(T) Signal transduction mechanisms	GO_component: GO:1990604 - IRE1-TRAF2-ASK1 complex [Evidence IEA];GO_function: GO:0004672 - protein kinase activity [Evidence IEA];GO_function: GO:0005524 - ATP binding [Evidence IEA];GO_function: GO:0004674 - protein serine/threonine kinase activity [Evidence IEA];GO_function: GO:0004521 - RNA endonuclease activity [Evidence IEA];GO_function: GO:0051082 - unfolded protein binding [Evidence IEA];…
FUN_000590	FUN_000590-T1	mRNA	scaffold_1	12085786	12087907	-		hypothetical protein				PF00046	IPR001356 Homeodomain;IPR009057 Homedomain-like superfamily;IPR017970 Homeobox, conserved site;IPR051306 Homeobox domain-containing regulator	ENOG503GJNA	K:(K) Transcription	GO_component: GO:0005634 - nucleus [Evidence IEA];GO_function: GO:0000981 - DNA-binding transcription factor activity, RNA polymerase II-specific [Evidence IEA];GO_function: GO:0000977 - RNA polymerase II transcription regulatory region sequence-specific DNA binding [Evidence IEA];GO_function: GO:0003677 - DNA binding [Evidence IEA];GO_process: GO:0006357 - regulation of transcription by RNA poly…
FUN_000592	FUN_000592-T1	mRNA	scaffold_1	12099955	12101606	-		hypothetical protein				PF00046	IPR001356 Homeodomain;IPR009057 Homedomain-like superfamily;IPR017970 Homeobox, conserved site;IPR051306 Homeobox domain-containing regulator	ENOG503GJNA	K:(K) Transcription	GO_component: GO:0005634 - nucleus [Evidence IEA];GO_function: GO:0000981 - DNA-binding transcription factor activity, RNA polymerase II-specific [Evidence IEA];GO_function: GO:0000977 - RNA polymerase II transcription regulatory region sequence-specific DNA binding [Evidence IEA];GO_function: GO:0003677 - DNA binding [Evidence IEA];GO_process: GO:0006357 - regulation of transcription by RNA poly…
FUN_000593	FUN_000593-T1	mRNA	scaffold_1	12101882	12104260	-		hypothetical protein					IPR003609 PAN/Apple domain
FUN_000594	FUN_000594-T1	mRNA	scaffold_1	12104455	12109985	-		hypothetical protein				PF00754;PF22633	IPR006585 Fucolectin tachylectin-4 pentraxin-1;IPR008979 Galactose-binding-like domain superfamily;IPR051941 Blood Group Antigen-Binding Lectin	ENOG503BC84	S:(S) Function unknown					CBM47
FUN_000597	FUN_000597-T1	mRNA	scaffold_1	12151610	12161324	-	PAX3_1	Paired box protein Pax-3				PF00046	IPR001356 Homeodomain;IPR009057 Homedomain-like superfamily;IPR017970 Homeobox, conserved site;IPR051306 Homeobox domain-containing regulator	ENOG50KOG0849	K:(K) Transcription	GO_component: GO:0005634 - nucleus [Evidence IEA];GO_function: GO:0000981 - DNA-binding transcription factor activity, RNA polymerase II-specific [Evidence IEA];GO_function: GO:0000977 - RNA polymerase II transcription regulatory region sequence-specific DNA binding [Evidence IEA];GO_function: GO:0003677 - DNA binding [Evidence IEA];GO_process: GO:0006357 - regulation of transcription by RNA poly…
FUN_000598	FUN_000598-T1	mRNA	scaffold_1	12181988	12182826	-		hypothetical protein
FUN_000599	FUN_000599-T1	mRNA	scaffold_1	12183470	12187947	-		hypothetical protein
FUN_000600	FUN_000600-T1	mRNA	scaffold_1	12194872	12199184	-		hypothetical protein				PF00754;PF22633	IPR006585 Fucolectin tachylectin-4 pentraxin-1;IPR008979 Galactose-binding-like domain superfamily;IPR051941 Blood Group Antigen-Binding Lectin	ENOG503BWBK	S:(S) Function unknown					CBM47
FUN_000601	FUN_000601-T1	mRNA	scaffold_1	12207622	12234170	-		hypothetical protein					IPR008979 Galactose-binding-like domain superfamily
FUN_000604	FUN_000604-T1	mRNA	scaffold_1	12324234	12325008	-	SEMA5A_1	Semaphorin-5A				PF00090	IPR000884 Thrombospondin type-1 (TSP1) repeat;IPR036383 Thrombospondin type-1 (TSP1) repeat superfamily;IPR052065 Complement and asymmetry regulator	ENOG503B9EA	T:(T) Signal transduction mechanisms
FUN_000605	FUN_000605-T1	mRNA	scaffold_1	12336789	12338791	-	SEMA5A_2	Semaphorin-5A				PF00090	IPR000884 Thrombospondin type-1 (TSP1) repeat;IPR036383 Thrombospondin type-1 (TSP1) repeat superfamily;IPR052065 Complement and asymmetry regulator	ENOG503B9EA	T:(T) Signal transduction mechanisms
FUN_000612	FUN_000612-T1	mRNA	scaffold_1	12392665	12397270	+		hypothetical protein						ENOG503BEAP	S:(S) Function unknown
FUN_000613	FUN_000613-T1	mRNA	scaffold_1	12446127	12472096	-	LARS2_2	putative leucine--tRNA ligase, mitochondrial		6.1.1.4		PF08264;PF13603	IPR001412 Aminoacyl-tRNA synthetase, class I, conserved site;IPR002300 Aminoacyl-tRNA synthetase, class Ia;IPR002302 Leucine-tRNA ligase;IPR009008 Valyl/Leucyl/Isoleucyl-tRNA synthetase, editing domain;IPR009080 Aminoacyl-tRNA synthetase, class Ia, anticodon-binding;IPR013155 Methionyl/Valyl/Leucyl/Isoleucyl-tRNA synthetase, anticodon-binding;IPR014729 Rossmann-like alpha/beta/alpha sandwich fold…	ENOG503BA6R	J:(J) Translation, ribosomal structure and biogenesis	GO_component: GO:0005739 - mitochondrion [Evidence IEA];GO_function: GO:0002161 - aminoacyl-tRNA editing activity [Evidence IEA];GO_function: GO:0004812 - aminoacyl-tRNA ligase activity [Evidence IEA];GO_function: GO:0005524 - ATP binding [Evidence IEA];GO_function: GO:0004823 - leucine-tRNA ligase activity [Evidence IEA];GO_function: GO:0000166 - nucleotide binding [Evidence IEA];GO_process: GO:…
FUN_000614	FUN_000614-T1	mRNA	scaffold_1	12474430	12478912	+		hypothetical protein				PF00498;PF00533;PF16770	IPR000253 Forkhead-associated (FHA) domain;IPR001357 BRCT domain;IPR008984 SMAD/FHA domain superfamily;IPR036420 BRCT domain superfamily;IPR040227 Nibrin-related	ENOG503CB75	L:(L) Replication, recombination and repair	GO_component: GO:0030870 - Mre11 complex [Evidence IEA];GO_function: GO:0003684 - damaged DNA binding [Evidence IEA];GO_function: GO:0005515 - protein binding [Evidence IEA];GO_process: GO:0032508 - obsolete DNA duplex unwinding [Evidence IEA];GO_process: GO:0000724 - double-strand break repair via homologous recombination [Evidence IEA];GO_process: GO:0007095 - mitotic G2 DNA damage checkpoint s…
FUN_000615	FUN_000615-T1	mRNA	scaffold_1	12481104	12495189	+		hypothetical protein				PF16508	IPR032429 Nibrin, second BRCT domain;IPR040227 Nibrin-related;IPR043014 Nibrin, second BRCT domain superfamily	ENOG503BEUJ	L:(L) Replication, recombination and repair	GO_component: GO:0030870 - Mre11 complex [Evidence IEA];GO_function: GO:0003684 - damaged DNA binding [Evidence IEA];GO_process: GO:0032508 - obsolete DNA duplex unwinding [Evidence IEA];GO_process: GO:0000724 - double-strand break repair via homologous recombination [Evidence IEA];GO_process: GO:0007095 - mitotic G2 DNA damage checkpoint signaling [Evidence IEA];GO_process: GO:0006302 - double-s…
FUN_000617	FUN_000617-T1	mRNA	scaffold_1	12579725	12583758	+	ZC3HAV1L_1	Zinc finger CCCH-type antiviral					IPR051712 Mono-ADP-ribosyltransferase and antiviral protein	ENOG503BF5D	S:(S) Function unknown	GO_component: GO:0005634 - nucleus [Evidence IEA];GO_function: GO:0003950 - NAD+ poly-ADP-ribosyltransferase activity [Evidence IEA];GO_function: GO:1990404 - NAD+-protein ADP-ribosyltransferase activity [Evidence IEA];GO_process: GO:0140289 - obsolete protein mono-ADP-ribosylation [Evidence IEA]
FUN_000618	FUN_000618-T1	mRNA	scaffold_1	12583903	12589674	+	IRE1	bifunctional endoribonuclease/protein kinase ire1		2.7.11.1		PF06479	IPR000719 Protein kinase domain;IPR010513 KEN domain;IPR011009 Protein kinase-like domain superfamily;IPR038357 KEN domain superfamily;IPR045133 Serine/threonine-protein kinase/endoribonuclease IRE1/2-like	ENOG50KOG1027	K:(K) Transcription;L:(L) Replication, recombination and repair;T:(T) Signal transduction mechanisms	GO_component: GO:1990604 - IRE1-TRAF2-ASK1 complex [Evidence IEA];GO_function: GO:0004672 - protein kinase activity [Evidence IEA];GO_function: GO:0005524 - ATP binding [Evidence IEA];GO_function: GO:0004674 - protein serine/threonine kinase activity [Evidence IEA];GO_function: GO:0004521 - RNA endonuclease activity [Evidence IEA];GO_function: GO:0051082 - unfolded protein binding [Evidence IEA];…
FUN_000619	FUN_000619-T1	mRNA	scaffold_1	12600481	12614332	-	MIXL1_1	Mix paired-like homeobox				PF00046	IPR001356 Homeodomain;IPR009057 Homedomain-like superfamily;IPR017970 Homeobox, conserved site;IPR051306 Homeobox domain-containing regulator	ENOG503BNGX	K:(K) Transcription	GO_component: GO:0005634 - nucleus [Evidence IEA];GO_function: GO:0000981 - DNA-binding transcription factor activity, RNA polymerase II-specific [Evidence IEA];GO_function: GO:0000977 - RNA polymerase II transcription regulatory region sequence-specific DNA binding [Evidence IEA];GO_function: GO:0003677 - DNA binding [Evidence IEA];GO_process: GO:0006357 - regulation of transcription by RNA poly…
FUN_000622	FUN_000622-T1	mRNA	scaffold_1	12642068	12642780	-		hypothetical protein					IPR008979 Galactose-binding-like domain superfamily
FUN_000623	FUN_000623-T1	mRNA	scaffold_1	12656385	12657368	-		hypothetical protein					IPR008979 Galactose-binding-like domain superfamily
FUN_000624	FUN_000624-T1	mRNA	scaffold_1	12720901	12726478	-		hypothetical protein				PF13385	IPR013320 Concanavalin A-like lectin/glucanase domain superfamily	ENOG50KOG4193	S:(S) Function unknown
FUN_000625	FUN_000625-T1	mRNA	scaffold_1	12731577	12731953	-		hypothetical protein
FUN_000626	FUN_000626-T1	mRNA	scaffold_1	12774100	12779619	-		hypothetical protein				PF13385	IPR013320 Concanavalin A-like lectin/glucanase domain superfamily	ENOG50KOG4193	S:(S) Function unknown
FUN_000627	FUN_000627-T1	mRNA	scaffold_1	12824476	12849369	+		hypothetical protein
FUN_000642	FUN_000642-T1	mRNA	scaffold_1	12833333	13174420	+		hypothetical protein				PF00520;PF01365;PF02815;PF08454;PF08709	IPR000493 Inositol 1,4,5-trisphosphate receptor;IPR000699 RIH domain;IPR005821 Ion transport domain;IPR013662 RyR/IP3R Homology associated domain;IPR014821 Inositol 1,4,5-trisphosphate/ryanodine receptor;IPR015925 Ryanodine/Inositol 1,4,5-trisphosphate receptor;IPR016093 MIR motif;IPR035910 RyR/IP3 receptor binding core, RIH domain superfamily;IPR036300 Mir domain superfamily	ENOG503BM3F	T:(T) Signal transduction mechanisms	GO_component: GO:0005783 - endoplasmic reticulum [Evidence IEA];GO_component: GO:0016020 - membrane [Evidence IEA];GO_function: GO:0005216 - monoatomic ion channel activity [Evidence IEA];GO_function: GO:0005220 - inositol 1,4,5-trisphosphate-gated calcium channel activity [Evidence IEA];GO_function: GO:0070679 - inositol 1,4,5 trisphosphate binding [Evidence IEA];GO_function: GO:0005262 - calciu…
FUN_000644	FUN_000644-T1	mRNA	scaffold_1	13079181	13107088	+		hypothetical protein					IPR014821 Inositol 1,4,5-trisphosphate/ryanodine receptor;IPR015925 Ryanodine/Inositol 1,4,5-trisphosphate receptor	ENOG503BM3F	T:(T) Signal transduction mechanisms	GO_process: GO:0006816 - calcium ion transport [Evidence IEA]
FUN_094528	FUN_094528-T1	mRNA	scaffold_1	13083186	13174420	+		hypothetical protein				PF00520;PF01365;PF08454	IPR000699 RIH domain;IPR005821 Ion transport domain;IPR013662 RyR/IP3R Homology associated domain;IPR015925 Ryanodine/Inositol 1,4,5-trisphosphate receptor;IPR035910 RyR/IP3 receptor binding core, RIH domain superfamily	ENOG503BM3F	T:(T) Signal transduction mechanisms	GO_component: GO:0016020 - membrane [Evidence IEA];GO_function: GO:0005216 - monoatomic ion channel activity [Evidence IEA];GO_function: GO:0005262 - calcium channel activity [Evidence IEA];GO_process: GO:0006816 - calcium ion transport [Evidence IEA];GO_process: GO:0055085 - transmembrane transport [Evidence IEA];GO_process: GO:0006811 - monoatomic ion transport [Evidence IEA];GO_process: GO:007…
FUN_000650	FUN_000650-T1	mRNA	scaffold_1	13148264	13148661	-		hypothetical protein
FUN_000656	FUN_000656-T1	mRNA	scaffold_1	13192532	13209054	+	TRAPPC8_1	Trafficking protein particle complex 8					IPR024420 TRAPP III complex, Trs85	ENOG503BHB6	D:(D) Cell cycle control, cell division, chromosome partitioning	GO_component: GO:1990072 - TRAPPIII protein complex [Evidence IEA]
FUN_000657	FUN_000657-T1	mRNA	scaffold_1	13210146	13238053	+	TRAPPC8_2	Trafficking protein particle complex 8			269at6447	PF24542;PF24544;PF24545;PF24546	IPR024420 TRAPP III complex, Trs85	ENOG503BHB6	D:(D) Cell cycle control, cell division, chromosome partitioning	GO_component: GO:1990072 - TRAPPIII protein complex [Evidence IEA]
FUN_000658	FUN_000658-T1	mRNA	scaffold_1	13239170	13239505	-		hypothetical protein
FUN_000668	FUN_000668-T1	mRNA	scaffold_1	13378886	13390586	-	AQP4_1	Aquaporin-4					IPR000425 Major intrinsic protein;IPR023271 Aquaporin-like;IPR034294 Aquaporin transporter	ENOG503BGGI	G:(G) Carbohydrate transport and metabolism	GO_component: GO:0016020 - membrane [Evidence IEA];GO_component: GO:0005886 - plasma membrane [Evidence IEA];GO_function: GO:0015267 - channel activity [Evidence IEA];GO_function: GO:0015250 - water channel activity [Evidence IEA];GO_process: GO:0006833 - water transport [Evidence IEA];GO_process: GO:0055085 - transmembrane transport [Evidence IEA]
FUN_000669	FUN_000669-T1	mRNA	scaffold_1	13390765	13422578	-		hypothetical protein					IPR000425 Major intrinsic protein;IPR022357 Major intrinsic protein, conserved site;IPR023271 Aquaporin-like;IPR034294 Aquaporin transporter	ENOG503BGGI	G:(G) Carbohydrate transport and metabolism	GO_component: GO:0016020 - membrane [Evidence IEA];GO_component: GO:0005886 - plasma membrane [Evidence IEA];GO_function: GO:0015267 - channel activity [Evidence IEA];GO_function: GO:0015250 - water channel activity [Evidence IEA];GO_process: GO:0006833 - water transport [Evidence IEA];GO_process: GO:0055085 - transmembrane transport [Evidence IEA]
FUN_000670	FUN_000670-T1	mRNA	scaffold_1	13445117	13463176	+		hypothetical protein				PF00008;PF07645;PF12661	IPR000152 EGF-type aspartate/asparagine hydroxylation site;IPR000742 EGF-like domain;IPR001881 EGF-like calcium-binding domain;IPR009030 Growth factor receptor cysteine-rich domain superfamily;IPR018097 EGF-like calcium-binding, conserved site;IPR051022 Notch Signaling and Cell Fate Determination	ENOG50KOG1217	O:(O) Posttranslational modification, protein turnover, chaperones	GO_function: GO:0005509 - calcium ion binding [Evidence IEA]
FUN_000671	FUN_000671-T1	mRNA	scaffold_1	13463787	13475700	+		hypothetical protein				PF00147	IPR002181 Fibrinogen, alpha/beta/gamma chain, C-terminal globular domain;IPR014716 Fibrinogen, alpha/beta/gamma chain, C-terminal globular, subdomain 1;IPR036056 Fibrinogen-like, C-terminal;IPR037579 Fibrinogen/angiopoietin-like	ENOG503BHNR	T:(T) Signal transduction mechanisms	GO_component: GO:0005577 - fibrinogen complex [Evidence IEA];GO_function: GO:0030674 - protein-macromolecule adaptor activity [Evidence IEA];GO_function: GO:0005201 - extracellular matrix structural constituent [Evidence IEA];GO_process: GO:0042730 - fibrinolysis [Evidence IEA];GO_process: GO:0034116 - positive regulation of heterotypic cell-cell adhesion [Evidence IEA];GO_process: GO:0072377 - b…
FUN_000672	FUN_000672-T1	mRNA	scaffold_1	13485050	13491436	-	TTLL9_1	putative tubulin polyglutamylase ttll9					IPR004344 Tubulin-tyrosine ligase/Tubulin polyglutamylase	ENOG503B9HG	O:(O) Posttranslational modification, protein turnover, chaperones	GO_component: GO:0036064 - ciliary basal body [Evidence IEA];GO_function: GO:0015631 - tubulin binding [Evidence IEA];GO_function: GO:0070740 - tubulin-glutamic acid ligase activity [Evidence IEA];GO_process: GO:0000226 - microtubule cytoskeleton organization [Evidence IEA];GO_process: GO:0036211 - protein modification process [Evidence IEA];GO_process: GO:0018095 - protein polyglutamylation [Evi…
FUN_000673	FUN_000673-T1	mRNA	scaffold_1	13518888	13535379	+	DUSP22	Dual specificity protein phosphatase 22				PF00782	IPR000340 Dual specificity phosphatase, catalytic domain;IPR000387 Tyrosine-specific protein phosphatases domain;IPR020422 Dual specificity protein phosphatase domain;IPR029021 Protein-tyrosine phosphatase-like	ENOG503BDC3	V:(V) Defense mechanisms	GO_component: GO:0005829 - cytosol [Evidence IEA];GO_function: GO:0004725 - protein tyrosine phosphatase activity [Evidence IEA];GO_process: GO:0007165 - signal transduction [Evidence IEA];GO_process: GO:0016311 - dephosphorylation [Evidence IEA];GO_process: GO:0006470 - protein dephosphorylation [Evidence IEA]
FUN_000676	FUN_000676-T1	mRNA	scaffold_1	13555153	13599921	+	IRF4	interferon regulatory factor				PF00605	IPR001346 Interferon regulatory factor, DNA-binding domain;IPR019817 Interferon regulatory factor, conserved site;IPR036388 Winged helix-like DNA-binding domain superfamily;IPR036390 Winged helix DNA-binding domain superfamily	ENOG503BBQH	S:(S) Function unknown	GO_component: GO:0005634 - nucleus [Evidence IEA];GO_function: GO:0000978 - RNA polymerase II cis-regulatory region sequence-specific DNA binding [Evidence IEA];GO_function: GO:0000981 - DNA-binding transcription factor activity, RNA polymerase II-specific [Evidence IEA];GO_function: GO:0000976 - transcription cis-regulatory region binding [Evidence IEA];GO_function: GO:0003700 - DNA-binding tran…
FUN_000677	FUN_000677-T1	mRNA	scaffold_1	13600196	13609021	+	IRF5	Interferon regulatory factor				PF10401	IPR008984 SMAD/FHA domain superfamily;IPR017855 SMAD-like domain superfamily;IPR019471 Interferon regulatory factor-3	ENOG503BESX	K:(K) Transcription	GO_component: GO:0005634 - nucleus [Evidence IEA];GO_function: GO:0000981 - DNA-binding transcription factor activity, RNA polymerase II-specific [Evidence IEA];GO_function: GO:0005515 - protein binding [Evidence IEA];GO_function: GO:0000978 - RNA polymerase II cis-regulatory region sequence-specific DNA binding [Evidence IEA];GO_function: GO:0003700 - DNA-binding transcription factor activity [E…
FUN_000689	FUN_000689-T1	mRNA	scaffold_1	13671173	13673622	-		hypothetical protein
FUN_000690	FUN_000690-T1	mRNA	scaffold_1	13673706	13674475	-		hypothetical protein
FUN_000693	FUN_000693-T1	mRNA	scaffold_1	13691549	13696351	-		hypothetical protein					IPR008979 Galactose-binding-like domain superfamily
FUN_000694	FUN_000694-T1	mRNA	scaffold_1	13741758	13743202	-	ASIC5_1	ion channel					IPR001873 Epithelial sodium channel	ENOG503B9A5	P:(P) Inorganic ion transport and metabolism;T:(T) Signal transduction mechanisms	GO_component: GO:0016020 - membrane [Evidence IEA];GO_function: GO:0005272 - sodium channel activity [Evidence IEA];GO_process: GO:0006814 - sodium ion transport [Evidence IEA]
FUN_000695	FUN_000695-T1	mRNA	scaffold_1	13749623	13755776	-	ASIC5_2	sodium channel activity				PF00858	IPR001873 Epithelial sodium channel	ENOG50KOG4294	C:(C) Energy production and conversion	GO_component: GO:0016020 - membrane [Evidence IEA];GO_component: GO:0005886 - plasma membrane [Evidence IEA];GO_function: GO:0015280 - ligand-gated sodium channel activity [Evidence IEA];GO_function: GO:0005272 - sodium channel activity [Evidence IEA];GO_process: GO:0006814 - sodium ion transport [Evidence IEA];GO_process: GO:0035725 - sodium ion transmembrane transport [Evidence IEA]
FUN_000698	FUN_000698-T1	mRNA	scaffold_1	13797511	13826770	+		hypothetical protein			2958at6447	PF15073	IPR027867 Spermatogenesis-associated protein 48	ENOG503BDK4	S:(S) Function unknown
FUN_000699	FUN_000699-T1	mRNA	scaffold_1	13830549	13830748	+		hypothetical protein
FUN_000704	FUN_000704-T1	mRNA	scaffold_1	13848216	13859831	+	wht-7_1	ATPase activity					IPR003439 ABC transporter-like, ATP-binding domain;IPR027417 P-loop containing nucleoside triphosphate hydrolase;IPR050352 ATP-binding cassette subfamily G transporters	ENOG503BCP7	Q:(Q) Secondary metabolites biosynthesis, transport and catabolism	GO_component: GO:0016020 - membrane [Evidence IEA];GO_component: GO:0005886 - plasma membrane [Evidence IEA];GO_function: GO:0042626 - ATPase-coupled transmembrane transporter activity [Evidence IEA];GO_function: GO:0005524 - ATP binding [Evidence IEA];GO_function: GO:0016887 - ATP hydrolysis activity [Evidence IEA];GO_process: GO:0055085 - transmembrane transport [Evidence IEA]
FUN_000705	FUN_000705-T1	mRNA	scaffold_1	13879489	13883793	+		hypothetical protein
FUN_000713	FUN_000713-T1	mRNA	scaffold_1	13943360	13989859	+	wht-7_2	ATPase activity				PF00005;PF01061	IPR003439 ABC transporter-like, ATP-binding domain;IPR003593 AAA+ ATPase domain;IPR005284 Pigment precursor permease/Protein ATP-binding cassette sub-family G;IPR013525 ABC-2 type transporter, transmembrane domain;IPR017871 ABC transporter-like, conserved site;IPR027417 P-loop containing nucleoside triphosphate hydrolase;IPR043926 ABC transporter family G domain;IPR050352 ATP-binding cassette sub…	ENOG503BCP7	Q:(Q) Secondary metabolites biosynthesis, transport and catabolism	GO_component: GO:0016020 - membrane [Evidence IEA];GO_component: GO:0005886 - plasma membrane [Evidence IEA];GO_function: GO:0140359 - ABC-type transporter activity [Evidence IEA];GO_function: GO:0042626 - ATPase-coupled transmembrane transporter activity [Evidence IEA];GO_function: GO:0016887 - ATP hydrolysis activity [Evidence IEA];GO_function: GO:0005524 - ATP binding [Evidence IEA];GO_process…
FUN_000716	FUN_000716-T1	mRNA	scaffold_1	14012981	14015623	+		hypothetical protein
FUN_000721	FUN_000721-T1	mRNA	scaffold_1	14019020	14104536	+		hypothetical protein				PF00648	IPR001300 Peptidase C2, calpain, catalytic domain;IPR022684 Peptidase C2, calpain family;IPR024420 TRAPP III complex, Trs85;IPR036213 Calpain large subunit, domain III superfamily;IPR038765 Papain-like cysteine peptidase superfamily	ENOG50KOG0045	O:(O) Posttranslational modification, protein turnover, chaperones	GO_component: GO:0005737 - cytoplasm [Evidence IEA];GO_function: GO:0004198 - calcium-dependent cysteine-type endopeptidase activity [Evidence IEA];GO_process: GO:0006508 - proteolysis [Evidence IEA]			C02A
FUN_000722	FUN_000722-T1	mRNA	scaffold_1	14116227	14136603	+	TRAPPC8_3	Trafficking protein particle complex 8, variant 3				PF24542;PF24546	IPR024420 TRAPP III complex, Trs85	ENOG503BHB6	D:(D) Cell cycle control, cell division, chromosome partitioning	GO_component: GO:1990072 - TRAPPIII protein complex [Evidence IEA]
FUN_000722	FUN_000722-T2	mRNA	scaffold_1	14116227	14136603	+	TRAPPC8_3	Trafficking protein particle complex 8, variant 2				PF24542;PF24546	IPR024420 TRAPP III complex, Trs85	ENOG503BHB6	D:(D) Cell cycle control, cell division, chromosome partitioning	GO_component: GO:1990072 - TRAPPIII protein complex [Evidence IEA]
FUN_000722	FUN_000722-T3	mRNA	scaffold_1	14116227	14136603	+	TRAPPC8_3	Trafficking protein particle complex 8				PF24542;PF24546	IPR024420 TRAPP III complex, Trs85	ENOG503BHB6	D:(D) Cell cycle control, cell division, chromosome partitioning	GO_component: GO:1990072 - TRAPPIII protein complex [Evidence IEA]
FUN_000723	FUN_000723-T1	mRNA	scaffold_1	14137714	14138187	-		hypothetical protein
FUN_000724	FUN_000724-T1	mRNA	scaffold_1	14164071	14164230	+		hypothetical protein
FUN_000736	FUN_000736-T1	mRNA	scaffold_1	14334409	14341798	+		hypothetical protein
FUN_000738	FUN_000738-T1	mRNA	scaffold_1	14388429	14393172	+		hypothetical protein
FUN_000740	FUN_000740-T1	mRNA	scaffold_1	14421607	14477157	-	MTG2	GTPase of the mitochondrial inner membrane that associates with the large ribosomal subunit			7575at6447	PF01018;PF02421	IPR006073 GTP binding domain;IPR006169 GTP1/OBG domain;IPR014100 GTP-binding protein Obg/CgtA;IPR027417 P-loop containing nucleoside triphosphate hydrolase;IPR031167 OBG-type guanine nucleotide-binding (G) domain;IPR036726 GTP1/OBG domain superfamily;IPR045086 OBG-type GTPase	ENOG503BBJQ	G:(G) Carbohydrate transport and metabolism	GO_component: GO:0005739 - mitochondrion [Evidence IEA];GO_function: GO:0000287 - magnesium ion binding [Evidence IEA];GO_function: GO:0005525 - GTP binding [Evidence IEA];GO_function: GO:0003924 - GTPase activity [Evidence IEA]
FUN_000741	FUN_000741-T1	mRNA	scaffold_1	14483256	14507919	-	P4HTM_1	L-ascorbic acid binding				PF13540	IPR000408 Regulator of chromosome condensation, RCC1;IPR006620 Prolyl 4-hydroxylase, alpha subunit;IPR009091 Regulator of chromosome condensation 1/beta-lactamase-inhibitor protein II;IPR045054 Prolyl 4-hydroxylase	ENOG503BE11	E:(E) Amino acid transport and metabolism	GO_component: GO:0005783 - endoplasmic reticulum [Evidence IEA];GO_function: GO:0004656 - procollagen-proline 4-dioxygenase activity [Evidence IEA];GO_function: GO:0016705 - oxidoreductase activity, acting on paired donors, with incorporation or reduction of molecular oxygen [Evidence IEA];GO_function: GO:0031418 - L-ascorbic acid binding [Evidence IEA];GO_function: GO:0005506 - iron ion binding …
FUN_000742	FUN_000742-T1	mRNA	scaffold_1	14514695	14517755	+		hypothetical protein
FUN_000743	FUN_000743-T1	mRNA	scaffold_1	14520548	14521636	+		hypothetical protein
FUN_000746	FUN_000746-T1	mRNA	scaffold_1	14577029	14579636	+		hypothetical protein
FUN_000748	FUN_000748-T1	mRNA	scaffold_1	14587321	14598523	+		hypothetical protein					IPR009602 CBY1-interacting BAR domain-containing protein/FAM92	ENOG503BE14	S:(S) Function unknown	GO_component: GO:0035869 - ciliary transition zone [Evidence IEA];GO_component: GO:0036064 - ciliary basal body [Evidence IEA];GO_process: GO:0060271 - cilium assembly [Evidence IEA]
FUN_000755	FUN_000755-T1	mRNA	scaffold_1	14687815	14694680	+		hypothetical protein
FUN_000757	FUN_000757-T1	mRNA	scaffold_1	14751098	14756073	+	TMEM67_1	Meckelin					IPR019170 Meckelin	ENOG503BDVB	S:(S) Function unknown	GO_component: GO:0035869 - ciliary transition zone [Evidence IEA];GO_component: GO:0036038 - MKS complex [Evidence IEA];GO_process: GO:0060271 - cilium assembly [Evidence IEA]
FUN_000758	FUN_000758-T1	mRNA	scaffold_1	14765685	14767065	-		hypothetical protein
FUN_000759	FUN_000759-T1	mRNA	scaffold_1	14775898	14787087	-		hypothetical protein					IPR001304 C-type lectin-like;IPR016186 C-type lectin-like/link domain superfamily;IPR016187 C-type lectin fold
FUN_000762	FUN_000762-T1	mRNA	scaffold_1	14798592	14799095	+		hypothetical protein
FUN_000764	FUN_000764-T1	mRNA	scaffold_1	14852156	14856673	-		hypothetical protein		6.1.1.4			IPR001412 Aminoacyl-tRNA synthetase, class I, conserved site;IPR002300 Aminoacyl-tRNA synthetase, class Ia;IPR004493 Leucyl-tRNA synthetase, class Ia, archaeal/eukaryotic cytosolic;IPR014729 Rossmann-like alpha/beta/alpha sandwich fold	ENOG503BGMU	J:(J) Translation, ribosomal structure and biogenesis	GO_function: GO:0000166 - nucleotide binding [Evidence IEA];GO_function: GO:0005524 - ATP binding [Evidence IEA];GO_function: GO:0004823 - leucine-tRNA ligase activity [Evidence IEA];GO_function: GO:0004812 - aminoacyl-tRNA ligase activity [Evidence IEA];GO_process: GO:0006429 - leucyl-tRNA aminoacylation [Evidence IEA];GO_process: GO:0006418 - tRNA aminoacylation for protein translation [Evidenc…
FUN_000765	FUN_000765-T1	mRNA	scaffold_1	14863404	14865390	-		hypothetical protein				PF13640	IPR044862 Prolyl 4-hydroxylase alpha subunit, Fe(2+) 2OG dioxygenase domain;IPR045054 Prolyl 4-hydroxylase	ENOG503BZ9V	E:(E) Amino acid transport and metabolism	GO_component: GO:0005783 - endoplasmic reticulum [Evidence IEA];GO_function: GO:0004656 - procollagen-proline 4-dioxygenase activity [Evidence IEA];GO_process: GO:0018401 - peptidyl-proline hydroxylation to 4-hydroxy-L-proline [Evidence IEA]
FUN_000767	FUN_000767-T1	mRNA	scaffold_1	14898654	14900090	+		hypothetical protein						ENOG503BSDR	S:(S) Function unknown
FUN_000768	FUN_000768-T1	mRNA	scaffold_1	14900116	14919166	-	P4HTM_2	prolyl 4-hydroxylase				PF13640	IPR006620 Prolyl 4-hydroxylase, alpha subunit;IPR044862 Prolyl 4-hydroxylase alpha subunit, Fe(2+) 2OG dioxygenase domain;IPR045054 Prolyl 4-hydroxylase	ENOG503BE11	E:(E) Amino acid transport and metabolism	GO_component: GO:0005783 - endoplasmic reticulum [Evidence IEA];GO_function: GO:0004656 - procollagen-proline 4-dioxygenase activity [Evidence IEA];GO_function: GO:0016705 - oxidoreductase activity, acting on paired donors, with incorporation or reduction of molecular oxygen [Evidence IEA];GO_function: GO:0031418 - L-ascorbic acid binding [Evidence IEA];GO_function: GO:0005506 - iron ion binding …
FUN_000772	FUN_000772-T1	mRNA	scaffold_1	14926451	14938667	-	P4HTM_3	prolyl 4-hydroxylase				PF13640	IPR006620 Prolyl 4-hydroxylase, alpha subunit;IPR044862 Prolyl 4-hydroxylase alpha subunit, Fe(2+) 2OG dioxygenase domain;IPR045054 Prolyl 4-hydroxylase	ENOG503BE11	E:(E) Amino acid transport and metabolism	GO_component: GO:0005783 - endoplasmic reticulum [Evidence IEA];GO_function: GO:0004656 - procollagen-proline 4-dioxygenase activity [Evidence IEA];GO_function: GO:0016705 - oxidoreductase activity, acting on paired donors, with incorporation or reduction of molecular oxygen [Evidence IEA];GO_function: GO:0031418 - L-ascorbic acid binding [Evidence IEA];GO_function: GO:0005506 - iron ion binding …
FUN_094529	FUN_094529-T1	mRNA	scaffold_1	14956501	14990227	-		hypothetical protein			9751at6447	PF00076	IPR000504 RNA recognition motif domain;IPR012677 Nucleotide-binding alpha-beta plait domain superfamily;IPR035979 RNA-binding domain superfamily;IPR050666 Epithelial Splicing Regulatory	ENOG503BIWX	A:(A) RNA processing and modification	GO_function: GO:0003723 - RNA binding [Evidence IEA];GO_function: GO:0003676 - nucleic acid binding [Evidence IEA]
FUN_000776	FUN_000776-T1	mRNA	scaffold_1	14990793	15020900	+	TMEM67_2	Meckelin					IPR019170 Meckelin	ENOG503BDVB	S:(S) Function unknown	GO_component: GO:0035869 - ciliary transition zone [Evidence IEA];GO_component: GO:0036038 - MKS complex [Evidence IEA];GO_process: GO:0060271 - cilium assembly [Evidence IEA]
FUN_000777	FUN_000777-T1	mRNA	scaffold_1	15020927	15028000	+	TMEM67_3	Meckelin					IPR019170 Meckelin	ENOG503BDVB	S:(S) Function unknown	GO_component: GO:0035869 - ciliary transition zone [Evidence IEA];GO_component: GO:0036038 - MKS complex [Evidence IEA];GO_process: GO:0060271 - cilium assembly [Evidence IEA]
FUN_000778	FUN_000778-T1	mRNA	scaffold_1	15028971	15032964	-		hypothetical protein
FUN_000779	FUN_000779-T1	mRNA	scaffold_1	15034081	15037819	-		hypothetical protein				PF00059	IPR001304 C-type lectin-like;IPR016186 C-type lectin-like/link domain superfamily;IPR016187 C-type lectin fold;IPR018378 C-type lectin, conserved site
FUN_000780	FUN_000780-T1	mRNA	scaffold_1	15043062	15043240	+		hypothetical protein
FUN_000784	FUN_000784-T1	mRNA	scaffold_1	15085322	15085551	-		hypothetical protein
FUN_000785	FUN_000785-T1	mRNA	scaffold_1	15088094	15099580	-		hypothetical protein			10965at6447
FUN_000787	FUN_000787-T1	mRNA	scaffold_1	15123043	15131510	-		hypothetical protein						ENOG50
FUN_000789	FUN_000789-T1	mRNA	scaffold_1	15133624	15179394	+	NDRG3_1	Protein ndrg3				PF03096	IPR004142 NDRG;IPR029058 Alpha/Beta hydrolase fold	ENOG503BH9F	S:(S) Function unknown				S33
FUN_000789	FUN_000789-T2	mRNA	scaffold_1	15133624	15179394	+	NDRG3_1	Protein ndrg3, variant 2				PF03096	IPR004142 NDRG;IPR029058 Alpha/Beta hydrolase fold	ENOG503BH9F	S:(S) Function unknown				S33
FUN_000791	FUN_000791-T1	mRNA	scaffold_1	15192102	15253358	+	DNAH5_1	Dynein heavy chain 5, axonemal					IPR013594 Dynein heavy chain, tail;IPR026983 Dynein heavy chain	ENOG503BDY4	Z:(Z) Cytoskeleton	GO_component: GO:0030286 - dynein complex [Evidence IEA];GO_component: GO:0005858 - axonemal dynein complex [Evidence IEA];GO_function: GO:0051959 - dynein light intermediate chain binding [Evidence IEA];GO_function: GO:0045505 - dynein intermediate chain binding [Evidence IEA];GO_process: GO:0007018 - microtubule-based movement [Evidence IEA]
FUN_000791	FUN_000791-T2	mRNA	scaffold_1	15192102	15253358	+	DNAH5_1	Dynein heavy chain 5, axonemal, variant 2					IPR013594 Dynein heavy chain, tail;IPR026983 Dynein heavy chain	ENOG503BDY4	Z:(Z) Cytoskeleton	GO_component: GO:0030286 - dynein complex [Evidence IEA];GO_component: GO:0005858 - axonemal dynein complex [Evidence IEA];GO_function: GO:0051959 - dynein light intermediate chain binding [Evidence IEA];GO_function: GO:0045505 - dynein intermediate chain binding [Evidence IEA];GO_process: GO:0007018 - microtubule-based movement [Evidence IEA]
FUN_000792	FUN_000792-T1	mRNA	scaffold_1	15253847	15275010	-		hypothetical protein				PF00595;PF17820	IPR001478 PDZ domain;IPR036034 PDZ superfamily;IPR051844 Sensory Perception USH2 Complex Protein	ENOG503BFF4	S:(S) Function unknown	GO_component: GO:0002142 - stereocilia ankle link complex [Evidence IEA];GO_component: GO:0005929 - cilium [Evidence IEA];GO_component: GO:0005886 - plasma membrane [Evidence IEA];GO_component: GO:0032426 - stereocilium tip [Evidence IEA];GO_function: GO:0005515 - protein binding [Evidence IEA]
FUN_000796	FUN_000796-T1	mRNA	scaffold_1	15346131	15354182	+		hypothetical protein					IPR009003 Peptidase S1, PA clan
FUN_000797	FUN_000797-T1	mRNA	scaffold_1	15366145	15369791	-		hypothetical protein						ENOG503C1B4
FUN_000800	FUN_000800-T1	mRNA	scaffold_1	15384125	15384584	-	NXPE4_1	Neurexophilin					IPR014756 Immunoglobulin E-set	ENOG503BFXU	S:(S) Function unknown
FUN_000801	FUN_000801-T1	mRNA	scaffold_1	15400155	15442844	+	NDRG3_3	Protein ndrg3				PF03096;PF12799	IPR001611 Leucine-rich repeat;IPR004142 NDRG;IPR025875 Leucine rich repeat 4;IPR029058 Alpha/Beta hydrolase fold;IPR032675 Leucine-rich repeat domain superfamily	ENOG503BH9F	S:(S) Function unknown	GO_function: GO:0005515 - protein binding [Evidence IEA]			S33
FUN_000811	FUN_000811-T1	mRNA	scaffold_1	15623099	15668822	+	NAA25_1	N-alpha-acetyltransferase 25, NatB auxiliary subunit			1415at6447	PF09797	IPR011990 Tetratricopeptide-like helical domain superfamily;IPR019183 N-alpha-acetyltransferase 25, NatB auxiliary subunit	ENOG503BF3N	Z:(Z) Cytoskeleton	GO_component: GO:0031416 - NatB complex [Evidence IEA];GO_component: GO:0005737 - cytoplasm [Evidence IEA];GO_function: GO:0005515 - protein binding [Evidence IEA];GO_process: GO:0017196 - N-terminal peptidyl-methionine acetylation [Evidence IEA]
FUN_000812	FUN_000812-T1	mRNA	scaffold_1	15672671	15682382	+	NAA25_2	N-alpha-acetyltransferase 25, NatB auxiliary subunit						ENOG503BF3N	Z:(Z) Cytoskeleton
FUN_000814	FUN_000814-T1	mRNA	scaffold_1	15682419	15689757	-		hypothetical protein
FUN_000815	FUN_000815-T1	mRNA	scaffold_1	15695174	15701696	-		hypothetical protein		2.5.1.18		PF01124	IPR001129 Membrane-associated, eicosanoid/glutathione metabolism (MAPEG) protein;IPR023352 Membrane associated eicosanoid/glutathione metabolism-like domain superfamily;IPR050997 Membrane-associated proteins in eicosanoid and glutathione metabolism	ENOG503BQWP	S:(S) Function unknown	GO_component: GO:0005635 - nuclear envelope [Evidence IEA];GO_component: GO:0016020 - membrane [Evidence IEA];GO_component: GO:0005783 - endoplasmic reticulum [Evidence IEA];GO_function: GO:0004602 - glutathione peroxidase activity [Evidence IEA];GO_function: GO:0004364 - glutathione transferase activity [Evidence IEA]
FUN_000816	FUN_000816-T1	mRNA	scaffold_1	15708012	15708974	-	HOGA1_1	4-hydroxy-2-oxoglutarate aldolase, mitochondrial		4.1.3.16	6246at6447	PF00701	IPR002220 DapA-like;IPR013785 Aldolase-type TIM barrel;IPR020625 Schiff base-forming aldolase, active site	ENOG503BGNT	E:(E) Amino acid transport and metabolism	GO_component: GO:0005739 - mitochondrion [Evidence IEA];GO_function: GO:0008700 - (R,S)-4-hydroxy-2-oxoglutarate aldolase activity [Evidence IEA];GO_function: GO:0016829 - lyase activity [Evidence IEA];GO_function: GO:0008840 - 4-hydroxy-tetrahydrodipicolinate synthase activity [Evidence IEA];GO_process: GO:0009436 - glyoxylate catabolic process [Evidence IEA]
FUN_000817	FUN_000817-T1	mRNA	scaffold_1	15716957	15729023	-		hypothetical protein				PF00096;PF12874;PF13894;PF13912	IPR013087 Zinc finger C2H2-type;IPR036236 Zinc finger C2H2 superfamily	ENOG503BA9A	C:(C) Energy production and conversion	GO_component: GO:0031519 - PcG protein complex [Evidence IEA];GO_component: GO:0005667 - transcription regulator complex [Evidence IEA];GO_component: GO:0000785 - chromatin [Evidence IEA];GO_function: GO:0000981 - DNA-binding transcription factor activity, RNA polymerase II-specific [Evidence IEA];GO_function: GO:0000978 - RNA polymerase II cis-regulatory region sequence-specific DNA binding [Evi…
FUN_000819	FUN_000819-T1	mRNA	scaffold_1	15740713	15749225	-	ZFP64_1	zinc finger protein				PF00096;PF12874;PF13894;PF13912;PF13913	IPR013087 Zinc finger C2H2-type;IPR036236 Zinc finger C2H2 superfamily	ENOG503BCKE	K:(K) Transcription	GO_component: GO:0005634 - nucleus [Evidence IEA];GO_function: GO:0001228 - DNA-binding transcription activator activity, RNA polymerase II-specific [Evidence IEA];GO_function: GO:0000978 - RNA polymerase II cis-regulatory region sequence-specific DNA binding [Evidence IEA];GO_process: GO:0006357 - regulation of transcription by RNA polymerase II [Evidence IEA]
FUN_000820	FUN_000820-T1	mRNA	scaffold_1	15771587	15771910	-		hypothetical protein
FUN_000823	FUN_000823-T1	mRNA	scaffold_1	15787844	15791773	+		hypothetical protein		3.2.1.8			IPR001000 Glycoside hydrolase family 10 domain;IPR017853 Glycoside hydrolase superfamily;IPR044846 Glycoside hydrolase family 10	ENOG5038FNV	G:(G) Carbohydrate transport and metabolism	GO_function: GO:0004553 - hydrolase activity, hydrolyzing O-glycosyl compounds [Evidence IEA];GO_process: GO:0005975 - carbohydrate metabolic process [Evidence IEA]
FUN_000825	FUN_000825-T1	mRNA	scaffold_1	15818526	15819153	-		hypothetical protein
FUN_000829	FUN_000829-T1	mRNA	scaffold_1	15862574	15868980	-		hypothetical protein				PF00149	IPR000126 Serine proteases, V8 family, serine active site;IPR004843 Calcineurin-like phosphoesterase domain, ApaH type;IPR008256 Peptidase S1B;IPR009003 Peptidase S1, PA clan;IPR029052 Metallo-dependent phosphatase-like;IPR043504 Peptidase S1, PA clan, chymotrypsin-like fold;IPR050126 Diadenosine polyphosphate hydrolase	ENOG503BR0B	T:(T) Signal transduction mechanisms	GO_component: GO:0005737 - cytoplasm [Evidence IEA];GO_function: GO:0000298 - endopolyphosphatase activity [Evidence IEA];GO_function: GO:0016787 - hydrolase activity [Evidence IEA];GO_function: GO:0008236 - serine-type peptidase activity [Evidence IEA];GO_function: GO:0016791 - phosphatase activity [Evidence IEA];GO_process: GO:0006508 - proteolysis [Evidence IEA];GO_process: GO:0006798 - polyph…			S01D
FUN_000832	FUN_000832-T1	mRNA	scaffold_1	15899055	15912469	+		hypothetical protein				PF08645;PF13671	IPR006549 HAD-superfamily hydrolase,subfamily IIIA;IPR006551 Polynucleotide 3'-phosphatase;IPR013954 Polynucleotide kinase 3 phosphatase;IPR023214 HAD superfamily;IPR027417 P-loop containing nucleoside triphosphate hydrolase;IPR036412 HAD-like superfamily	ENOG503B9QB	L:(L) Replication, recombination and repair	GO_component: GO:0005634 - nucleus [Evidence IEA];GO_function: GO:0003690 - double-stranded DNA binding [Evidence IEA];GO_function: GO:0046404 - ATP-dependent polydeoxyribonucleotide 5'-hydroxyl-kinase activity [Evidence IEA];GO_function: GO:0046403 - polynucleotide 3'-phosphatase activity [Evidence IEA];GO_process: GO:0046939 - obsolete nucleotide phosphorylation [Evidence IEA];GO_process: GO:00…
FUN_000833	FUN_000833-T1	mRNA	scaffold_1	15916318	15964988	-	DNAH5_3	Dynein heavy chain 5, axonemal				PF03028;PF07728;PF12775;PF12777;PF12780;PF12781;PF17852;PF17857;PF18198;PF18199;PF22597	IPR004273 Dynein heavy chain region D6 P-loop domain;IPR024317 Dynein heavy chain, AAA module D4;IPR024743 Dynein heavy chain, coiled coil stalk;IPR026983 Dynein heavy chain;IPR027417 P-loop containing nucleoside triphosphate hydrolase;IPR035699 Dynein heavy chain, hydrolytic ATP-binding dynein motor region;IPR035706 Dynein heavy chain, ATP-binding dynein motor region;IPR041228 Dynein heavy chain…	ENOG503BDY4	Z:(Z) Cytoskeleton	GO_component: GO:0030286 - dynein complex [Evidence IEA];GO_function: GO:0051959 - dynein light intermediate chain binding [Evidence IEA];GO_function: GO:0008569 - minus-end-directed microtubule motor activity [Evidence IEA];GO_function: GO:0005524 - ATP binding [Evidence IEA];GO_function: GO:0045505 - dynein intermediate chain binding [Evidence IEA];GO_process: GO:0007018 - microtubule-based mov…
FUN_000833	FUN_000833-T2	mRNA	scaffold_1	15916318	15964988	-	DNAH5_3	Dynein heavy chain 5, axonemal, variant 2				PF03028;PF12777;PF12780;PF12781;PF18198;PF18199	IPR004273 Dynein heavy chain region D6 P-loop domain;IPR024317 Dynein heavy chain, AAA module D4;IPR024743 Dynein heavy chain, coiled coil stalk;IPR026983 Dynein heavy chain;IPR027417 P-loop containing nucleoside triphosphate hydrolase;IPR035706 Dynein heavy chain, ATP-binding dynein motor region;IPR041228 Dynein heavy chain, C-terminal domain;IPR041658 Dynein heavy chain AAA lid domain;IPR042219…	ENOG503BDY4	Z:(Z) Cytoskeleton	GO_component: GO:0030286 - dynein complex [Evidence IEA];GO_function: GO:0051959 - dynein light intermediate chain binding [Evidence IEA];GO_function: GO:0008569 - minus-end-directed microtubule motor activity [Evidence IEA];GO_function: GO:0045505 - dynein intermediate chain binding [Evidence IEA];GO_process: GO:0007018 - microtubule-based movement [Evidence IEA]
FUN_000834	FUN_000834-T1	mRNA	scaffold_1	15991232	16009200	+	DNAH5_5	Dynein heavy chain 5, axonemal				PF08385;PF25007	IPR013594 Dynein heavy chain, tail;IPR026983 Dynein heavy chain;IPR056759 Dynein axonemal heavy chain 2/5/8, coiled-coil domain	ENOG503BDY4	Z:(Z) Cytoskeleton	GO_component: GO:0030286 - dynein complex [Evidence IEA];GO_component: GO:0005858 - axonemal dynein complex [Evidence IEA];GO_function: GO:0051959 - dynein light intermediate chain binding [Evidence IEA];GO_function: GO:0045505 - dynein intermediate chain binding [Evidence IEA];GO_process: GO:0007018 - microtubule-based movement [Evidence IEA]
FUN_000835	FUN_000835-T1	mRNA	scaffold_1	16009297	16044258	+	DNAH5_6	Dynein heavy chain 5, axonemal				PF07728;PF08393;PF12774;PF12775;PF12777;PF12780;PF17852;PF17857;PF22597	IPR003593 AAA+ ATPase domain;IPR013602 Dynein heavy chain, linker;IPR024317 Dynein heavy chain, AAA module D4;IPR024743 Dynein heavy chain, coiled coil stalk;IPR026983 Dynein heavy chain;IPR027417 P-loop containing nucleoside triphosphate hydrolase;IPR035699 Dynein heavy chain, hydrolytic ATP-binding dynein motor region;IPR041466 Dynein heavy chain, AAA 5 extension domain;IPR041589 Dynein heavy c…	ENOG503BDY4	Z:(Z) Cytoskeleton	GO_component: GO:0030286 - dynein complex [Evidence IEA];GO_component: GO:0005858 - axonemal dynein complex [Evidence IEA];GO_function: GO:0051959 - dynein light intermediate chain binding [Evidence IEA];GO_function: GO:0016887 - ATP hydrolysis activity [Evidence IEA];GO_function: GO:0045505 - dynein intermediate chain binding [Evidence IEA];GO_function: GO:0005524 - ATP binding [Evidence IEA];GO…
FUN_000836	FUN_000836-T1	mRNA	scaffold_1	16045567	16049060	+	DNAH5_7	Dynein heavy chain 5, axonemal					IPR024743 Dynein heavy chain, coiled coil stalk;IPR026983 Dynein heavy chain;IPR027417 P-loop containing nucleoside triphosphate hydrolase;IPR035706 Dynein heavy chain, ATP-binding dynein motor region	ENOG503BDY4	Z:(Z) Cytoskeleton	GO_component: GO:0030286 - dynein complex [Evidence IEA];GO_function: GO:0051959 - dynein light intermediate chain binding [Evidence IEA];GO_function: GO:0045505 - dynein intermediate chain binding [Evidence IEA];GO_process: GO:0007018 - microtubule-based movement [Evidence IEA]
FUN_000837	FUN_000837-T1	mRNA	scaffold_1	16049129	16055565	+	DNAH5_8	Dynein heavy chain 5, axonemal				PF03028	IPR004273 Dynein heavy chain region D6 P-loop domain;IPR026983 Dynein heavy chain;IPR027417 P-loop containing nucleoside triphosphate hydrolase;IPR035706 Dynein heavy chain, ATP-binding dynein motor region	ENOG503BDY4	Z:(Z) Cytoskeleton	GO_component: GO:0030286 - dynein complex [Evidence IEA];GO_function: GO:0051959 - dynein light intermediate chain binding [Evidence IEA];GO_function: GO:0008569 - minus-end-directed microtubule motor activity [Evidence IEA];GO_function: GO:0045505 - dynein intermediate chain binding [Evidence IEA];GO_process: GO:0007018 - microtubule-based movement [Evidence IEA]
FUN_000838	FUN_000838-T1	mRNA	scaffold_1	16055745	16061448	+	DNAH5_9	Dynein heavy chain 5, axonemal				PF18198;PF18199	IPR026983 Dynein heavy chain;IPR041228 Dynein heavy chain, C-terminal domain;IPR041658 Dynein heavy chain AAA lid domain;IPR042219 Dynein heavy chain AAA lid domain superfamily;IPR043160 Dynein heavy chain, C-terminal domain, barrel region	ENOG503BDY4	Z:(Z) Cytoskeleton	GO_component: GO:0030286 - dynein complex [Evidence IEA];GO_function: GO:0051959 - dynein light intermediate chain binding [Evidence IEA];GO_function: GO:0045505 - dynein intermediate chain binding [Evidence IEA];GO_process: GO:0007018 - microtubule-based movement [Evidence IEA]
FUN_000839	FUN_000839-T1	mRNA	scaffold_1	16067967	16068404	+		hypothetical protein
FUN_000840	FUN_000840-T1	mRNA	scaffold_1	16072425	16094897	-		hypothetical protein			3365at6447	PF08645;PF13671;PF17913	IPR006549 HAD-superfamily hydrolase,subfamily IIIA;IPR006551 Polynucleotide 3'-phosphatase;IPR008984 SMAD/FHA domain superfamily;IPR013954 Polynucleotide kinase 3 phosphatase;IPR023214 HAD superfamily;IPR027417 P-loop containing nucleoside triphosphate hydrolase;IPR036412 HAD-like superfamily;IPR041388 PNK, FHA domain	ENOG503B9QB	L:(L) Replication, recombination and repair	GO_function: GO:0003690 - double-stranded DNA binding [Evidence IEA];GO_function: GO:0005515 - protein binding [Evidence IEA];GO_function: GO:0046404 - ATP-dependent polydeoxyribonucleotide 5'-hydroxyl-kinase activity [Evidence IEA];GO_function: GO:0046403 - polynucleotide 3'-phosphatase activity [Evidence IEA];GO_process: GO:0046939 - obsolete nucleotide phosphorylation [Evidence IEA];GO_process…
FUN_000841	FUN_000841-T1	mRNA	scaffold_1	16095117	16113916	+	RECQL4_1	ATP-dependent DNA helicase Q4		3.6.4.12	1891at6447	PF00098;PF00270	IPR001878 Zinc finger, CCHC-type;IPR011545 DEAD/DEAH box helicase domain;IPR014001 Helicase superfamily 1/2, ATP-binding domain;IPR021110 DNA replication/checkpoint protein;IPR027417 P-loop containing nucleoside triphosphate hydrolase;IPR036875 Zinc finger, CCHC-type superfamily	ENOG503BAJ0	L:(L) Replication, recombination and repair	GO_component: GO:0005737 - cytoplasm [Evidence IEA];GO_component: GO:0005694 - chromosome [Evidence IEA];GO_component: GO:0005634 - nucleus [Evidence IEA];GO_function: GO:0008270 - zinc ion binding [Evidence IEA];GO_function: GO:0003676 - nucleic acid binding [Evidence IEA];GO_function: GO:0005524 - ATP binding [Evidence IEA];GO_function: GO:0009378 - four-way junction helicase activity [Evidence…
FUN_000842	FUN_000842-T1	mRNA	scaffold_1	16128894	16130933	-		hypothetical protein
FUN_000843	FUN_000843-T1	mRNA	scaffold_1	16166633	16167058	+		hypothetical protein
FUN_000853	FUN_000853-T1	mRNA	scaffold_1	16290535	16290884	-		hypothetical protein
FUN_000854	FUN_000854-T1	mRNA	scaffold_1	16290904	16291067	-		hypothetical protein
FUN_000855	FUN_000855-T1	mRNA	scaffold_1	16303360	16303545	-		hypothetical protein
FUN_000860	FUN_000860-T1	mRNA	scaffold_1	16414315	16414741	+		hypothetical protein
FUN_000862	FUN_000862-T1	mRNA	scaffold_1	16424490	16430836	+		hypothetical protein
FUN_000863	FUN_000863-T1	mRNA	scaffold_1	16448376	16453931	+		hypothetical protein
FUN_000864	FUN_000864-T1	mRNA	scaffold_1	16519599	16534164	+		hypothetical protein
FUN_000865	FUN_000865-T1	mRNA	scaffold_1	16534608	16557946	+		hypothetical protein
FUN_000865	FUN_000865-T2	mRNA	scaffold_1	16534608	16557946	+		hypothetical protein
FUN_000867	FUN_000867-T1	mRNA	scaffold_1	16591087	16592810	-	TATDN2_1	Putative deoxyribonuclease tatdn2					IPR001130 3'-5' ssDNA/RNA exonuclease TatD-like;IPR032466 Metal-dependent hydrolase	ENOG503BG46	L:(L) Replication, recombination and repair	GO_function: GO:0016788 - hydrolase activity, acting on ester bonds [Evidence IEA]
FUN_000872	FUN_000872-T1	mRNA	scaffold_1	16772356	16775247	+	Fmo9	dimethylaniline monooxygenase N-oxide-forming		1.14.13.8			IPR020946 Flavin monooxygenase-like;IPR036188 FAD/NAD(P)-binding domain superfamily	ENOG503BC4Q	Q:(Q) Secondary metabolites biosynthesis, transport and catabolism	GO_function: GO:0050661 - NADP binding [Evidence IEA];GO_function: GO:0004499 - N,N-dimethylaniline monooxygenase activity [Evidence IEA];GO_function: GO:0050660 - flavin adenine dinucleotide binding [Evidence IEA]
FUN_000873	FUN_000873-T1	mRNA	scaffold_1	16775434	16781498	-		hypothetical protein					IPR015421 Pyridoxal phosphate-dependent transferase, major domain;IPR015424 Pyridoxal phosphate-dependent transferase	ENOG501RNNI	E:(E) Amino acid transport and metabolism
FUN_000878	FUN_000878-T1	mRNA	scaffold_1	16882912	16883858	+		hypothetical protein
FUN_000879	FUN_000879-T1	mRNA	scaffold_1	16883922	16886267	+		hypothetical protein
FUN_000882	FUN_000882-T1	mRNA	scaffold_1	16903490	16924162	+	RECQL4_2	ATP-dependent DNA helicase Q4		3.6.4.12				ENOG503BAJ0	A:(A) RNA processing and modification
FUN_000883	FUN_000883-T1	mRNA	scaffold_1	16978245	16979752	+	RECQL4_3	ATP-dependent DNA helicase Q4		3.6.4.12				ENOG503BAJ0	A:(A) RNA processing and modification
FUN_000886	FUN_000886-T1	mRNA	scaffold_1	17136755	17138465	+		hypothetical protein
FUN_000891	FUN_000891-T1	mRNA	scaffold_1	17242453	17244073	+		hypothetical protein
FUN_000896	FUN_000896-T1	mRNA	scaffold_1	17256716	17259354	-		hypothetical protein				PF07677	IPR009048 Alpha-macroglobulin, receptor-binding;IPR036595 Alpha-macroglobulin, receptor-binding domain superfamily;IPR050473 Alpha-2-macroglobulin/Complement system	ENOG503BCF2	O:(O) Posttranslational modification, protein turnover, chaperones	GO_component: GO:0005576 - extracellular region [Evidence IEA]
FUN_000897	FUN_000897-T1	mRNA	scaffold_1	17259411	17266123	-		hypothetical protein					IPR052671 Acrosomal SP-10-like
FUN_000899	FUN_000899-T1	mRNA	scaffold_1	17272510	17387474	-		hypothetical protein				PF00207;PF07678;PF07703	IPR001599 Alpha-2-macroglobulin;IPR008930 Terpenoid cyclases/protein prenyltransferase alpha-alpha toroid;IPR011625 Alpha-2-macroglobulin, bait region domain;IPR011626 Alpha-macroglobulin-like, TED domain;IPR013783 Immunoglobulin-like fold;IPR014756 Immunoglobulin E-set;IPR019742 Alpha-2-macroglobulin, conserved site;IPR047565 Alpha-macroglobulin-like, thiol-ester bond-forming region;IPR050473 Al…	ENOG503BCF2	O:(O) Posttranslational modification, protein turnover, chaperones	GO_component: GO:0005615 - extracellular space [Evidence IEA];GO_function: GO:0004866 - endopeptidase inhibitor activity [Evidence IEA]			I39
FUN_000901	FUN_000901-T1	mRNA	scaffold_1	17470379	17477289	-		hypothetical protein						ENOG503BM3F	T:(T) Signal transduction mechanisms
FUN_000902	FUN_000902-T1	mRNA	scaffold_1	17487198	17492727	-		hypothetical protein				PF00520	IPR005821 Ion transport domain;IPR015925 Ryanodine/Inositol 1,4,5-trisphosphate receptor	ENOG503BM3F	T:(T) Signal transduction mechanisms	GO_component: GO:0016020 - membrane [Evidence IEA];GO_function: GO:0005216 - monoatomic ion channel activity [Evidence IEA];GO_process: GO:0006816 - calcium ion transport [Evidence IEA];GO_process: GO:0055085 - transmembrane transport [Evidence IEA];GO_process: GO:0006811 - monoatomic ion transport [Evidence IEA]
FUN_000904	FUN_000904-T1	mRNA	scaffold_1	17515261	17558191	-		hypothetical protein				PF01365	IPR000699 RIH domain;IPR015925 Ryanodine/Inositol 1,4,5-trisphosphate receptor;IPR035910 RyR/IP3 receptor binding core, RIH domain superfamily	ENOG503BM3F	T:(T) Signal transduction mechanisms	GO_component: GO:0016020 - membrane [Evidence IEA];GO_function: GO:0005262 - calcium channel activity [Evidence IEA];GO_process: GO:0006816 - calcium ion transport [Evidence IEA];GO_process: GO:0070588 - calcium ion transmembrane transport [Evidence IEA]
FUN_000905	FUN_000905-T1	mRNA	scaffold_1	17558982	17611250	-		hypothetical protein				PF02815;PF08709	IPR000493 Inositol 1,4,5-trisphosphate receptor;IPR014821 Inositol 1,4,5-trisphosphate/ryanodine receptor;IPR015925 Ryanodine/Inositol 1,4,5-trisphosphate receptor;IPR016093 MIR motif;IPR036300 Mir domain superfamily	ENOG503BM3F	T:(T) Signal transduction mechanisms	GO_component: GO:0005783 - endoplasmic reticulum [Evidence IEA];GO_function: GO:0005220 - inositol 1,4,5-trisphosphate-gated calcium channel activity [Evidence IEA];GO_function: GO:0070679 - inositol 1,4,5 trisphosphate binding [Evidence IEA];GO_process: GO:0006816 - calcium ion transport [Evidence IEA]
FUN_000915	FUN_000915-T1	mRNA	scaffold_1	17778137	17785012	-		hypothetical protein				PF00264	IPR002227 Tyrosinase copper-binding domain;IPR008708 TspB virulence factor;IPR008922 Di-copper centre-containing domain superfamily;IPR050316 Tyrosinase and Hemocyanin	ENOG503BGBA	S:(S) Function unknown	GO_function: GO:0016491 - oxidoreductase activity [Evidence IEA]
FUN_000916	FUN_000916-T1	mRNA	scaffold_1	17789028	17790256	-		hypothetical protein						ENOG503BGBA	S:(S) Function unknown
FUN_000917	FUN_000917-T1	mRNA	scaffold_1	17790343	17794606	-		hypothetical protein				PF00264	IPR002227 Tyrosinase copper-binding domain;IPR008922 Di-copper centre-containing domain superfamily;IPR050316 Tyrosinase and Hemocyanin	ENOG503BGBA	S:(S) Function unknown	GO_function: GO:0016491 - oxidoreductase activity [Evidence IEA]
FUN_000920	FUN_000920-T1	mRNA	scaffold_1	17832037	17832962	+		hypothetical protein
FUN_000921	FUN_000921-T1	mRNA	scaffold_1	17834938	17838866	+		hypothetical protein
FUN_000922	FUN_000922-T1	mRNA	scaffold_1	17839906	17843143	-		hypothetical protein				PF00264	IPR002227 Tyrosinase copper-binding domain;IPR008922 Di-copper centre-containing domain superfamily;IPR050316 Tyrosinase and Hemocyanin	ENOG503BGBA	S:(S) Function unknown	GO_function: GO:0016491 - oxidoreductase activity [Evidence IEA]
FUN_000927	FUN_000927-T1	mRNA	scaffold_1	17908812	17925527	+	FOXF1_1	Forkhead box protein F1			7092at6447	PF00250	IPR001766 Fork head domain;IPR018122 Fork head domain conserved site1;IPR030456 Fork head domain conserved site 2;IPR036388 Winged helix-like DNA-binding domain superfamily;IPR036390 Winged helix DNA-binding domain superfamily;IPR051770 Forkhead box transcription regulator	ENOG503BET4	K:(K) Transcription	GO_component: GO:0005634 - nucleus [Evidence IEA];GO_function: GO:0000978 - RNA polymerase II cis-regulatory region sequence-specific DNA binding [Evidence IEA];GO_function: GO:0000981 - DNA-binding transcription factor activity, RNA polymerase II-specific [Evidence IEA];GO_function: GO:0043565 - sequence-specific DNA binding [Evidence IEA];GO_function: GO:0003700 - DNA-binding transcription fact…
FUN_000929	FUN_000929-T1	mRNA	scaffold_1	17985889	18002066	+	RAD51C_1	DNA repair protein rad51c					IPR010995 DNA repair Rad51/transcription factor NusA, alpha-helical;IPR013632 DNA recombination and repair protein Rad51-like, C-terminal;IPR016467 DNA recombination and repair protein, RecA-like;IPR020588 DNA recombination and repair protein RecA-like, ATP-binding domain;IPR027417 P-loop containing nucleoside triphosphate hydrolase;IPR052093 Homologous Recombination Repair Mediator	ENOG503BH3B	L:(L) Replication, recombination and repair	GO_component: GO:0033063 - Rad51B-Rad51C-Rad51D-XRCC2 complex [Evidence IEA];GO_component: GO:0005657 - replication fork [Evidence IEA];GO_component: GO:0033065 - Rad51C-XRCC3 complex [Evidence IEA];GO_function: GO:0000400 - four-way junction DNA binding [Evidence IEA];GO_function: GO:0008821 - crossover junction DNA endonuclease activity [Evidence IEA];GO_function: GO:0005524 - ATP binding [Evid…
FUN_000932	FUN_000932-T1	mRNA	scaffold_1	18007957	18025477	-		hypothetical protein			7152at6447	PF14769	IPR032727 Flagellar C1a complex subunit C1a-32	ENOG503BI6Z	S:(S) Function unknown
FUN_000939	FUN_000939-T1	mRNA	scaffold_1	18083043	18119551	-		hypothetical protein					IPR001611 Leucine-rich repeat;IPR003591 Leucine-rich repeat, typical subtype;IPR032675 Leucine-rich repeat domain superfamily;IPR050836 SDS22/Internalin LRR-containing	ENOG50KOG0531	L:(L) Replication, recombination and repair	GO_function: GO:0005515 - protein binding [Evidence IEA]
FUN_000940	FUN_000940-T1	mRNA	scaffold_1	18123052	18124193	+		hypothetical protein				PF00135	IPR002018 Carboxylesterase, type B;IPR019819 Carboxylesterase type B, conserved site;IPR019826 Carboxylesterase type B, active site;IPR029058 Alpha/Beta hydrolase fold;IPR050309 Type-B Carboxylesterase/Lipase	ENOG503BI0J	I:(I) Lipid transport and metabolism				S09X
FUN_000941	FUN_000941-T1	mRNA	scaffold_1	18131768	18132650	+		hypothetical protein					IPR029058 Alpha/Beta hydrolase fold	ENOG503BI0J	I:(I) Lipid transport and metabolism
FUN_000942	FUN_000942-T1	mRNA	scaffold_1	18140810	18171540	+		hypothetical protein				PF00135	IPR002018 Carboxylesterase, type B;IPR019819 Carboxylesterase type B, conserved site;IPR019826 Carboxylesterase type B, active site;IPR029058 Alpha/Beta hydrolase fold;IPR050309 Type-B Carboxylesterase/Lipase	ENOG503BI0J	I:(I) Lipid transport and metabolism				S09X
FUN_000942	FUN_000942-T2	mRNA	scaffold_1	18140810	18171540	+		hypothetical protein				PF00135	IPR002018 Carboxylesterase, type B;IPR019819 Carboxylesterase type B, conserved site;IPR019826 Carboxylesterase type B, active site;IPR029058 Alpha/Beta hydrolase fold;IPR050309 Type-B Carboxylesterase/Lipase	ENOG503BI0J	I:(I) Lipid transport and metabolism				S09X
FUN_000943	FUN_000943-T1	mRNA	scaffold_1	18174324	18175061	-		hypothetical protein
FUN_000944	FUN_000944-T1	mRNA	scaffold_1	18181594	18186472	-	rps15a	structural constituent of ribosome			8686at6447	PF00410	IPR000630 Small ribosomal subunit protein uS8;IPR035987 Small ribosomal subunit protein uS8 superfamily;IPR047863 Small ribosomal subunit protein uS8, conserved site	ENOG503BPBA	J:(J) Translation, ribosomal structure and biogenesis	GO_component: GO:0005840 - ribosome [Evidence IEA];GO_function: GO:0003735 - structural constituent of ribosome [Evidence IEA];GO_process: GO:0006412 - translation [Evidence IEA]
FUN_000945	FUN_000945-T1	mRNA	scaffold_1	18189465	18198330	+		hypothetical protein						ENOG503C52X
FUN_000946	FUN_000946-T1	mRNA	scaffold_1	18216280	18218791	-		hypothetical protein
FUN_000947	FUN_000947-T1	mRNA	scaffold_1	18232920	18233623	-		hypothetical protein				PF02349	IPR003330 Major surface glycoprotein MSG
FUN_000949	FUN_000949-T1	mRNA	scaffold_1	18277815	18286596	-	Heatr9	HEAT repeat containing 9					IPR011989 Armadillo-like helical;IPR016024 Armadillo-type fold;IPR052873 HEAT repeat-containing protein 9	ENOG503BMWX	S:(S) Function unknown
FUN_000952	FUN_000952-T1	mRNA	scaffold_1	18355122	18367359	-		hypothetical protein				PF00651;PF07707;PF08005	IPR000210 BTB/POZ domain;IPR011333 SKP1/BTB/POZ domain superfamily;IPR011705 BTB/Kelch-associated;IPR012983 PHR;IPR038648 PHR domain superfamily	ENOG503C1N5	S:(S) Function unknown	GO_component: GO:0005829 - cytosol [Evidence IEA];GO_function: GO:0005515 - protein binding [Evidence IEA];GO_process: GO:0022008 - neurogenesis [Evidence IEA]
FUN_000952	FUN_000952-T2	mRNA	scaffold_1	18355122	18367359	-		hypothetical protein				PF00651;PF07707;PF08005	IPR000210 BTB/POZ domain;IPR011333 SKP1/BTB/POZ domain superfamily;IPR011705 BTB/Kelch-associated;IPR012983 PHR;IPR038648 PHR domain superfamily	ENOG503C1N5	S:(S) Function unknown	GO_component: GO:0005829 - cytosol [Evidence IEA];GO_function: GO:0005515 - protein binding [Evidence IEA];GO_process: GO:0022008 - neurogenesis [Evidence IEA]
FUN_000954	FUN_000954-T1	mRNA	scaffold_1	18386402	18387705	-		hypothetical protein
FUN_000956	FUN_000956-T1	mRNA	scaffold_1	18403484	18404059	-		hypothetical protein
FUN_000957	FUN_000957-T1	mRNA	scaffold_1	18428112	18428429	-		hypothetical protein
FUN_000958	FUN_000958-T1	mRNA	scaffold_1	18430137	18430637	-		hypothetical protein
FUN_000959	FUN_000959-T1	mRNA	scaffold_1	18438468	18440671	-		hypothetical protein
FUN_000962	FUN_000962-T1	mRNA	scaffold_1	18467937	18508805	-		hypothetical protein				PF01365	IPR000699 RIH domain;IPR015925 Ryanodine/Inositol 1,4,5-trisphosphate receptor;IPR035910 RyR/IP3 receptor binding core, RIH domain superfamily;IPR036300 Mir domain superfamily	ENOG503BM3F	T:(T) Signal transduction mechanisms	GO_component: GO:0016020 - membrane [Evidence IEA];GO_function: GO:0005262 - calcium channel activity [Evidence IEA];GO_process: GO:0006816 - calcium ion transport [Evidence IEA];GO_process: GO:0070588 - calcium ion transmembrane transport [Evidence IEA]
FUN_000965	FUN_000965-T1	mRNA	scaffold_1	18567172	18573940	-		hypothetical protein					IPR008139 Saposin B type domain;IPR011001 Saposin-like
FUN_000967	FUN_000967-T1	mRNA	scaffold_1	18671182	18692452	-		hypothetical protein				PF00264	IPR002227 Tyrosinase copper-binding domain;IPR008922 Di-copper centre-containing domain superfamily;IPR050316 Tyrosinase and Hemocyanin	ENOG503BGBA	S:(S) Function unknown	GO_function: GO:0016491 - oxidoreductase activity [Evidence IEA]
FUN_000968	FUN_000968-T1	mRNA	scaffold_1	18698091	18698372	+		hypothetical protein
FUN_000969	FUN_000969-T1	mRNA	scaffold_1	18698375	18704075	+		hypothetical protein
FUN_000970	FUN_000970-T1	mRNA	scaffold_1	18709471	18712569	-		hypothetical protein				PF00264	IPR002227 Tyrosinase copper-binding domain;IPR008922 Di-copper centre-containing domain superfamily;IPR050316 Tyrosinase and Hemocyanin	ENOG503BGBA	S:(S) Function unknown	GO_function: GO:0016491 - oxidoreductase activity [Evidence IEA]
FUN_000973	FUN_000973-T1	mRNA	scaffold_1	18825552	18829714	-		hypothetical protein					IPR000569 HECT domain;IPR035983 HECT, E3 ligase catalytic domain	ENOG503BQ14	S:(S) Function unknown	GO_function: GO:0004842 - ubiquitin-protein transferase activity [Evidence IEA]
FUN_000974	FUN_000974-T1	mRNA	scaffold_1	18855450	18866052	+		hypothetical protein
FUN_000975	FUN_000975-T1	mRNA	scaffold_1	18877707	18892570	+	FYCO1_1	FYVE and coiled-coil domain-containing protein 1					IPR009038 GOLD domain;IPR036598 GOLD domain superfamily	ENOG503B963	S:(S) Function unknown	GO_component: GO:0005776 - autophagosome [Evidence IEA];GO_component: GO:0005764 - lysosome [Evidence IEA];GO_component: GO:0005770 - late endosome [Evidence IEA];GO_process: GO:0072383 - plus-end-directed vesicle transport along microtubule [Evidence IEA];GO_process: GO:1901098 - positive regulation of autophagosome maturation [Evidence IEA]
FUN_000976	FUN_000976-T1	mRNA	scaffold_1	18894586	18901224	-		hypothetical protein				PF01607	IPR002557 Chitin binding domain;IPR036508 Chitin binding domain superfamily;IPR051940 Chitin-binding developmental regulator	ENOG503C60V	S:(S) Function unknown	GO_component: GO:0005576 - extracellular region [Evidence IEA];GO_function: GO:0008061 - chitin binding [Evidence IEA]
FUN_000977	FUN_000977-T1	mRNA	scaffold_1	18932721	18935736	-	MRPL45_1	39S ribosomal protein L45, mitochondrial				PF04280	IPR007379 Tim44-like domain;IPR032710 NTF2-like domain superfamily;IPR051975 Mitochondrial Large Ribosomal Subunit mL45	ENOG503BA7P	J:(J) Translation, ribosomal structure and biogenesis	GO_component: GO:0005739 - mitochondrion [Evidence IEA]
FUN_000978	FUN_000978-T1	mRNA	scaffold_1	18935817	18942787	-	MRPL45_2	39S ribosomal protein L45, mitochondrial					IPR051975 Mitochondrial Large Ribosomal Subunit mL45	ENOG503BA7P	J:(J) Translation, ribosomal structure and biogenesis	GO_component: GO:0005739 - mitochondrion [Evidence IEA]
FUN_000979	FUN_000979-T1	mRNA	scaffold_1	18945632	18958385	+	BZW2_1	Basic leucine zipper and W2 domain-containing protein 2			4334at6447	PF02020	IPR003307 W2 domain;IPR016024 Armadillo-type fold;IPR043510 BZW1/2, W2 domain;IPR051245 eIF5-mimic translation initiation regulator	ENOG503BFWH	J:(J) Translation, ribosomal structure and biogenesis	GO_component: GO:0005737 - cytoplasm [Evidence IEA];GO_component: GO:0016020 - membrane [Evidence IEA];GO_function: GO:0005515 - protein binding [Evidence IEA]
FUN_000980	FUN_000980-T1	mRNA	scaffold_1	18963516	18999270	-	DUOX2_1	NAD(P)H oxidase activity		1.6.3.1		PF01794;PF03098;PF08022;PF08030	IPR002048 EF-hand domain;IPR010255 Haem peroxidase superfamily;IPR011992 EF-hand domain pair;IPR013112 FAD-binding 8;IPR013121 Ferric reductase, NAD binding domain;IPR013130 Ferric reductase transmembrane component-like domain;IPR017927 FAD-binding domain, ferredoxin reductase-type;IPR017938 Riboflavin synthase-like beta-barrel;IPR018247 EF-Hand 1, calcium-binding site;IPR019791 Haem peroxidase, …	ENOG5038CEX	P:(P) Inorganic ion transport and metabolism;Q:(Q) Secondary metabolites biosynthesis, transport and catabolism	GO_component: GO:0005886 - plasma membrane [Evidence IEA];GO_component: GO:0043020 - NADPH oxidase complex [Evidence IEA];GO_function: GO:0020037 - heme binding [Evidence IEA];GO_function: GO:0016491 - oxidoreductase activity [Evidence IEA];GO_function: GO:0005509 - calcium ion binding [Evidence IEA];GO_function: GO:0016175 - superoxide-generating NAD(P)H oxidase activity [Evidence IEA];GO_functi…
FUN_000981	FUN_000981-T1	mRNA	scaffold_1	19024818	19030677	+		hypothetical protein		1.6.3.1			IPR010255 Haem peroxidase superfamily;IPR019791 Haem peroxidase, animal-type;IPR037120 Haem peroxidase domain superfamily, animal type	ENOG503BDMU	P:(P) Inorganic ion transport and metabolism;Q:(Q) Secondary metabolites biosynthesis, transport and catabolism	GO_function: GO:0020037 - heme binding [Evidence IEA];GO_function: GO:0004601 - peroxidase activity [Evidence IEA];GO_process: GO:0006979 - response to oxidative stress [Evidence IEA]
FUN_000982	FUN_000982-T1	mRNA	scaffold_1	19030782	19066107	+	DUOX2_2	NAD(P)H oxidase activity		1.6.3.1		PF01794;PF03098;PF08022;PF08030	IPR002048 EF-hand domain;IPR010255 Haem peroxidase superfamily;IPR011992 EF-hand domain pair;IPR013112 FAD-binding 8;IPR013121 Ferric reductase, NAD binding domain;IPR013130 Ferric reductase transmembrane component-like domain;IPR017927 FAD-binding domain, ferredoxin reductase-type;IPR017938 Riboflavin synthase-like beta-barrel;IPR018247 EF-Hand 1, calcium-binding site;IPR019791 Haem peroxidase, …	ENOG5038CEX	P:(P) Inorganic ion transport and metabolism;Q:(Q) Secondary metabolites biosynthesis, transport and catabolism	GO_component: GO:0005886 - plasma membrane [Evidence IEA];GO_component: GO:0043020 - NADPH oxidase complex [Evidence IEA];GO_function: GO:0020037 - heme binding [Evidence IEA];GO_function: GO:0016491 - oxidoreductase activity [Evidence IEA];GO_function: GO:0005509 - calcium ion binding [Evidence IEA];GO_function: GO:0016175 - superoxide-generating NAD(P)H oxidase activity [Evidence IEA];GO_functi…
FUN_000983	FUN_000983-T1	mRNA	scaffold_1	19071754	19083143	-	BZW2_2	Basic leucine zipper and W2 domain-containing protein 2			4334at6447	PF02020	IPR003307 W2 domain;IPR016024 Armadillo-type fold;IPR043510 BZW1/2, W2 domain;IPR051245 eIF5-mimic translation initiation regulator	ENOG503BFWH	J:(J) Translation, ribosomal structure and biogenesis	GO_component: GO:0005737 - cytoplasm [Evidence IEA];GO_component: GO:0016020 - membrane [Evidence IEA];GO_function: GO:0005515 - protein binding [Evidence IEA]
FUN_000984	FUN_000984-T1	mRNA	scaffold_1	19086020	19088260	+		hypothetical protein
FUN_000985	FUN_000985-T1	mRNA	scaffold_1	19094662	19098797	+	MRPL45_3	39S ribosomal protein L45, mitochondrial			8651at6447	PF04280	IPR007379 Tim44-like domain;IPR032710 NTF2-like domain superfamily;IPR051975 Mitochondrial Large Ribosomal Subunit mL45	ENOG503BA7P	J:(J) Translation, ribosomal structure and biogenesis	GO_component: GO:0005739 - mitochondrion [Evidence IEA]
FUN_000988	FUN_000988-T1	mRNA	scaffold_1	19140443	19141293	+		hypothetical protein				PF01607	IPR002557 Chitin binding domain;IPR036508 Chitin binding domain superfamily;IPR051940 Chitin-binding developmental regulator	ENOG503C60V	S:(S) Function unknown	GO_component: GO:0005576 - extracellular region [Evidence IEA];GO_function: GO:0008061 - chitin binding [Evidence IEA]
FUN_000989	FUN_000989-T1	mRNA	scaffold_1	19146634	19168758	-	FYCO1_2	FYVE and coiled-coil domain-containing protein 1			2650at6447	PF01363	IPR000306 FYVE zinc finger;IPR009038 GOLD domain;IPR011011 Zinc finger, FYVE/PHD-type;IPR013083 Zinc finger, RING/FYVE/PHD-type;IPR017455 Zinc finger, FYVE-related;IPR036598 GOLD domain superfamily;IPR047337 FYCO1, FYVE domain	ENOG503B963	S:(S) Function unknown	GO_component: GO:0005776 - autophagosome [Evidence IEA];GO_component: GO:0005764 - lysosome [Evidence IEA];GO_component: GO:0005770 - late endosome [Evidence IEA];GO_function: GO:0046872 - metal ion binding [Evidence IEA];GO_process: GO:0072383 - plus-end-directed vesicle transport along microtubule [Evidence IEA];GO_process: GO:1901098 - positive regulation of autophagosome maturation [Evidence …
FUN_000990	FUN_000990-T1	mRNA	scaffold_1	19168947	19170020	-		hypothetical protein
FUN_000991	FUN_000991-T1	mRNA	scaffold_1	19170767	19176638	-		hypothetical protein
FUN_000992	FUN_000992-T1	mRNA	scaffold_1	19179063	19179641	-	FYCO1_3	FYVE and coiled-coil domain-containing protein 1				PF02759	IPR004012 RUN domain;IPR037213 RUN domain superfamily	ENOG503B963	S:(S) Function unknown	GO_component: GO:0005776 - autophagosome [Evidence IEA];GO_component: GO:0005764 - lysosome [Evidence IEA];GO_component: GO:0005770 - late endosome [Evidence IEA];GO_process: GO:0072383 - plus-end-directed vesicle transport along microtubule [Evidence IEA];GO_process: GO:1901098 - positive regulation of autophagosome maturation [Evidence IEA]
FUN_000993	FUN_000993-T1	mRNA	scaffold_1	19216236	19262529	+	FBXL20_1	F-box/LRR-repeat protein 20				PF00646;PF12937	IPR001810 F-box domain;IPR036047 F-box-like domain superfamily;IPR052121 F-box Protein Family Substrate Recognition Components	ENOG503BB3Z	S:(S) Function unknown	GO_component: GO:0005737 - cytoplasm [Evidence IEA];GO_function: GO:0005515 - protein binding [Evidence IEA]
FUN_001004	FUN_001004-T1	mRNA	scaffold_1	19518315	19519378	-		hypothetical protein
FUN_001008	FUN_001008-T1	mRNA	scaffold_1	19631704	19633810	+		hypothetical protein			5179at6447	PF00250	IPR001766 Fork head domain;IPR018122 Fork head domain conserved site1;IPR030456 Fork head domain conserved site 2;IPR036388 Winged helix-like DNA-binding domain superfamily;IPR036390 Winged helix DNA-binding domain superfamily;IPR047514 Forkhead box protein L1, forkhead domain;IPR050211 Forkhead box domain-containing protein	ENOG503BED6	K:(K) Transcription	GO_function: GO:0000978 - RNA polymerase II cis-regulatory region sequence-specific DNA binding [Evidence IEA];GO_function: GO:0000981 - DNA-binding transcription factor activity, RNA polymerase II-specific [Evidence IEA];GO_function: GO:0043565 - sequence-specific DNA binding [Evidence IEA];GO_function: GO:0003700 - DNA-binding transcription factor activity [Evidence IEA];GO_process: GO:0009653 …
FUN_001009	FUN_001009-T1	mRNA	scaffold_1	19647051	19647461	-		hypothetical protein
FUN_001012	FUN_001012-T1	mRNA	scaffold_1	19716085	19720856	-	AMOTL1_1	angiomotin						ENOG503BFZ9	S:(S) Function unknown
FUN_001015	FUN_001015-T1	mRNA	scaffold_1	19764853	19765236	+		hypothetical protein
FUN_001017	FUN_001017-T1	mRNA	scaffold_1	19773182	19773865	+		hypothetical protein
FUN_001018	FUN_001018-T1	mRNA	scaffold_1	19774408	19776963	+		hypothetical protein
FUN_001022	FUN_001022-T1	mRNA	scaffold_1	19844429	19848317	+	FOXL1	Forkhead box protein L1			7849at6447	PF00250	IPR001766 Fork head domain;IPR018122 Fork head domain conserved site1;IPR030456 Fork head domain conserved site 2;IPR036388 Winged helix-like DNA-binding domain superfamily;IPR036390 Winged helix DNA-binding domain superfamily;IPR047514 Forkhead box protein L1, forkhead domain;IPR050211 Forkhead box domain-containing protein	ENOG503BFGR	K:(K) Transcription	GO_function: GO:0000978 - RNA polymerase II cis-regulatory region sequence-specific DNA binding [Evidence IEA];GO_function: GO:0000981 - DNA-binding transcription factor activity, RNA polymerase II-specific [Evidence IEA];GO_function: GO:0043565 - sequence-specific DNA binding [Evidence IEA];GO_function: GO:0003700 - DNA-binding transcription factor activity [Evidence IEA];GO_process: GO:0009653 …
FUN_001025	FUN_001025-T1	mRNA	scaffold_1	19914187	19920402	-		hypothetical protein		4.2.1.47				ENOG503B9EK	G:(G) Carbohydrate transport and metabolism
FUN_001026	FUN_001026-T1	mRNA	scaffold_1	19939013	19994761	-		hypothetical protein		4.2.1.47	3295at6447		IPR006368 GDP-mannose 4,6-dehydratase;IPR016040 NAD(P)-binding domain;IPR036291 NAD(P)-binding domain superfamily	ENOG503B9EK	G:(G) Carbohydrate transport and metabolism	GO_function: GO:0008446 - GDP-mannose 4,6-dehydratase activity [Evidence IEA];GO_process: GO:0042351 - 'de novo' GDP-L-fucose biosynthetic process [Evidence IEA];GO_process: GO:0019673 - GDP-mannose metabolic process [Evidence IEA]
FUN_001027	FUN_001027-T1	mRNA	scaffold_1	19995094	20003033	+		hypothetical protein			8421at6447	PF00536;PF07647	IPR001660 Sterile alpha motif domain;IPR013761 Sterile alpha motif/pointed domain superfamily;IPR033635 Ankyrin repeat and SAM domain-containing protein 1/Caskin	ENOG503BRPN	S:(S) Function unknown	GO_component: GO:0005829 - cytosol [Evidence IEA];GO_function: GO:0005515 - protein binding [Evidence IEA]
FUN_001028	FUN_001028-T1	mRNA	scaffold_1	20007390	20009174	-		hypothetical protein					IPR000569 HECT domain;IPR035983 HECT, E3 ligase catalytic domain	ENOG503BQ14	S:(S) Function unknown	GO_function: GO:0004842 - ubiquitin-protein transferase activity [Evidence IEA]
FUN_001031	FUN_001031-T1	mRNA	scaffold_1	20087525	20110032	-		hypothetical protein
FUN_001034	FUN_001034-T1	mRNA	scaffold_1	20183542	20185535	-		hypothetical protein						ENOG503BQ14
FUN_001036	FUN_001036-T1	mRNA	scaffold_1	20190309	20212403	+		hypothetical protein				PF00498	IPR000253 Forkhead-associated (FHA) domain;IPR008984 SMAD/FHA domain superfamily;IPR050923 Cellular Process Regulator and RNA Processing Protein	ENOG503CNS8	T:(T) Signal transduction mechanisms	GO_function: GO:0005515 - protein binding [Evidence IEA]
FUN_001037	FUN_001037-T1	mRNA	scaffold_1	20212510	20226397	+		hypothetical protein						ENOG503CNS8	T:(T) Signal transduction mechanisms
FUN_001038	FUN_001038-T1	mRNA	scaffold_1	20231989	20248652	-	SMPD3	Sphingomyelin phosphodiesterase 3		3.1.4.12	7274at6447		IPR036691 Endonuclease/exonuclease/phosphatase superfamily;IPR038772 Sphingomyelinase C/Sphingomyelin phosphodiesterase 2-like	ENOG5039SH0	S:(S) Function unknown	GO_component: GO:0005737 - cytoplasm [Evidence IEA];GO_function: GO:0004767 - sphingomyelin phosphodiesterase activity [Evidence IEA];GO_function: GO:0004620 - phospholipase activity [Evidence IEA]
FUN_001039	FUN_001039-T1	mRNA	scaffold_1	20272011	20541879	-	AGXT2	alanine--glyoxylate aminotransferase 2		2.6.1.4	2507at6447	PF00202	IPR005814 Aminotransferase class-III;IPR015421 Pyridoxal phosphate-dependent transferase, major domain;IPR015422 Pyridoxal phosphate-dependent transferase, small domain;IPR015424 Pyridoxal phosphate-dependent transferase;IPR049704 Aminotransferases class-III pyridoxal-phosphate attachment site	ENOG503BF4G	E:(E) Amino acid transport and metabolism	GO_component: GO:0005739 - mitochondrion [Evidence IEA];GO_function: GO:0008453 - alanine-glyoxylate transaminase activity [Evidence IEA];GO_function: GO:0030170 - pyridoxal phosphate binding [Evidence IEA];GO_function: GO:0008483 - transaminase activity [Evidence IEA];GO_process: GO:0009436 - glyoxylate catabolic process [Evidence IEA];GO_process: GO:0019481 - L-alanine catabolic process, by tra…
FUN_094530	FUN_094530-T1	mRNA	scaffold_1	20413631	20422396	-	SET5	SET domain-containing protein 5				PF00856;PF01753	IPR001214 SET domain;IPR002893 Zinc finger, MYND-type;IPR011990 Tetratricopeptide-like helical domain superfamily;IPR019734 Tetratricopeptide repeat;IPR046341 SET domain superfamily	ENOG503NX13	B:(B) Chromatin structure and dynamics	GO_function: GO:0005515 - protein binding [Evidence IEA];GO_function: GO:0042799 - histone H4K20 methyltransferase activity [Evidence IEA];GO_process: GO:0045814 - negative regulation of gene expression, epigenetic [Evidence IEA]
FUN_001040	FUN_001040-T1	mRNA	scaffold_1	20544868	20549122	-		hypothetical protein
FUN_001041	FUN_001041-T1	mRNA	scaffold_1	20552810	20580250	+	EDC4_1	enhancer of mRNA decapping 4			604at6447	PF00400;PF16529	IPR001680 WD40 repeat;IPR015943 WD40/YVTN repeat-like-containing domain superfamily;IPR032401 Enhancer of mRNA-decapping protein 4, WD40 repeat region;IPR036322 WD40-repeat-containing domain superfamily;IPR045152 Enhancer of mRNA-decapping protein 4-like	ENOG503BDGA	S:(S) Function unknown	GO_component: GO:0000932 - P-body [Evidence IEA];GO_function: GO:0005515 - protein binding [Evidence IEA];GO_process: GO:0031087 - deadenylation-independent decapping of nuclear-transcribed mRNA [Evidence IEA]
FUN_001042	FUN_001042-T1	mRNA	scaffold_1	20583818	20593746	+	EDC4_2	enhancer of mRNA decapping 4				PF21289	IPR044938 Enhancer of mRNA-decapping protein 4, conserved C-terminal domain superfamily;IPR045152 Enhancer of mRNA-decapping protein 4-like;IPR049404 Enhancer of mRNA-decapping protein 4, C-terminal	ENOG503BDGA	S:(S) Function unknown	GO_component: GO:0000932 - P-body [Evidence IEA];GO_process: GO:0031087 - deadenylation-independent decapping of nuclear-transcribed mRNA [Evidence IEA]
FUN_001043	FUN_001043-T1	mRNA	scaffold_1	20593997	20594368	-		hypothetical protein
FUN_001048	FUN_001048-T1	mRNA	scaffold_1	20667860	20668169	+		hypothetical protein
FUN_001052	FUN_001052-T1	mRNA	scaffold_1	20741669	20743087	-		hypothetical protein
FUN_001059	FUN_001059-T1	mRNA	scaffold_1	20886803	20907954	+	CYP2W1_1	cytochrome P450				PF00067	IPR001128 Cytochrome P450;IPR002401 Cytochrome P450, E-class, group I;IPR017972 Cytochrome P450, conserved site;IPR036396 Cytochrome P450 superfamily;IPR050182 Cytochrome P450 family 2	ENOG503BC78	Q:(Q) Secondary metabolites biosynthesis, transport and catabolism	GO_component: GO:0005737 - cytoplasm [Evidence IEA];GO_component: GO:0043231 - intracellular membrane-bounded organelle [Evidence IEA];GO_function: GO:0016712 - oxidoreductase activity, acting on paired donors, with incorporation or reduction of molecular oxygen, reduced flavin or flavoprotein as one donor, and incorporation of one atom of oxygen [Evidence IEA];GO_function: GO:0016705 - oxidoredu…
FUN_001061	FUN_001061-T1	mRNA	scaffold_1	20923797	20928405	+	daf-9_1	monooxygenase activity				PF00067	IPR001128 Cytochrome P450;IPR002401 Cytochrome P450, E-class, group I;IPR008069 Cytochrome P450, E-class, group I, CYP2D-like;IPR017972 Cytochrome P450, conserved site;IPR036396 Cytochrome P450 superfamily;IPR050182 Cytochrome P450 family 2	ENOG503BC78	Q:(Q) Secondary metabolites biosynthesis, transport and catabolism	GO_component: GO:0005737 - cytoplasm [Evidence IEA];GO_component: GO:0043231 - intracellular membrane-bounded organelle [Evidence IEA];GO_function: GO:0016712 - oxidoreductase activity, acting on paired donors, with incorporation or reduction of molecular oxygen, reduced flavin or flavoprotein as one donor, and incorporation of one atom of oxygen [Evidence IEA];GO_function: GO:0016705 - oxidoredu…
FUN_001064	FUN_001064-T1	mRNA	scaffold_1	21024824	21026284	-		hypothetical protein				PF00001	IPR000276 G protein-coupled receptor, rhodopsin-like;IPR017452 GPCR, rhodopsin-like, 7TM	ENOG50KOG4220	M:(M) Cell wall/membrane/envelope biogenesis	GO_component: GO:0045202 - synapse [Evidence IEA];GO_component: GO:0016020 - membrane [Evidence IEA];GO_component: GO:0005886 - plasma membrane [Evidence IEA];GO_component: GO:0030425 - dendrite [Evidence IEA];GO_function: GO:0030594 - neurotransmitter receptor activity [Evidence IEA];GO_function: GO:0016907 - G protein-coupled acetylcholine receptor activity [Evidence IEA];GO_function: GO:000499…
FUN_001065	FUN_001065-T1	mRNA	scaffold_1	21056507	21093859	-		hypothetical protein
FUN_001066	FUN_001066-T1	mRNA	scaffold_1	21095474	21100604	-		hypothetical protein
FUN_001068	FUN_001068-T1	mRNA	scaffold_1	21135748	21170368	-		hypothetical protein				PF00090;PF03160	IPR000884 Thrombospondin type-1 (TSP1) repeat;IPR003644 Na-Ca exchanger/integrin-beta4;IPR036383 Thrombospondin type-1 (TSP1) repeat superfamily;IPR038081 CalX-like domain superfamily	ENOG501QV7E	V:(V) Defense mechanisms	GO_component: GO:0016020 - membrane [Evidence IEA];GO_process: GO:0007154 - cell communication [Evidence IEA]
FUN_001069	FUN_001069-T1	mRNA	scaffold_1	21183269	21187508	-		hypothetical protein
FUN_001070	FUN_001070-T1	mRNA	scaffold_1	21202160	21205203	-		hypothetical protein
FUN_001076	FUN_001076-T1	mRNA	scaffold_1	21426449	21426654	+		hypothetical protein
FUN_001077	FUN_001077-T1	mRNA	scaffold_1	21426687	21432983	-		hypothetical protein
FUN_001078	FUN_001078-T1	mRNA	scaffold_1	21434445	21437534	-		hypothetical protein				PF00057	IPR002172 Low-density lipoprotein (LDL) receptor class A repeat;IPR023415 Low-density lipoprotein (LDL) receptor class A, conserved site;IPR035914 Spermadhesin, CUB domain superfamily;IPR036055 LDL receptor-like superfamily;IPR042333 LRAD2/Mig-13-like	ENOG503BWVM	O:(O) Posttranslational modification, protein turnover, chaperones	GO_function: GO:0005515 - protein binding [Evidence IEA]
FUN_001083	FUN_001083-T1	mRNA	scaffold_1	21561400	21566194	-		hypothetical protein						ENOG50KOG4177	I:(I) Lipid transport and metabolism
FUN_001083	FUN_001083-T2	mRNA	scaffold_1	21561400	21566194	-		hypothetical protein
FUN_001085	FUN_001085-T1	mRNA	scaffold_1	21607351	21634279	-	RHPN2_1	Rhophilin-2			2069at6447	PF00595;PF03097	IPR001478 PDZ domain;IPR004328 BRO1 domain;IPR036034 PDZ superfamily;IPR038499 BRO1 domain superfamily;IPR047138 Rhophilin-1/2	ENOG503BEU9	C:(C) Energy production and conversion	GO_function: GO:0005515 - protein binding [Evidence IEA];GO_process: GO:0051497 - negative regulation of stress fiber assembly [Evidence IEA]
FUN_001087	FUN_001087-T1	mRNA	scaffold_1	21676266	21676601	-		hypothetical protein
FUN_001088	FUN_001088-T1	mRNA	scaffold_1	21678623	21684943	+		hypothetical protein		2.3.2.27		PF00097;PF02176;PF13445;PF13639;PF13923	IPR001293 Zinc finger, TRAF-type;IPR001841 Zinc finger, RING-type;IPR013010 Zinc finger, SIAH-type;IPR013083 Zinc finger, RING/FYVE/PHD-type;IPR017907 Zinc finger, RING-type, conserved site	ENOG503BGSU	O:(O) Posttranslational modification, protein turnover, chaperones	GO_component: GO:0098802 - plasma membrane signaling receptor complex [Evidence IEA];GO_function: GO:0008270 - zinc ion binding [Evidence IEA];GO_process: GO:0043122 - regulation of canonical NF-kappaB signal transduction [Evidence IEA]
FUN_001090	FUN_001090-T1	mRNA	scaffold_1	21686143	21688843	+		hypothetical protein
FUN_001091	FUN_001091-T1	mRNA	scaffold_1	21709346	21710559	-		hypothetical protein
FUN_001095	FUN_001095-T1	mRNA	scaffold_1	21728667	21730770	+		hypothetical protein						ENOG503BJ7I	O:(O) Posttranslational modification, protein turnover, chaperones
FUN_001096	FUN_001096-T1	mRNA	scaffold_1	21741296	21752365	-	PHAF1_1	Phagosome assembly factor 1					IPR005373 Phagosome assembly factor 1;IPR039156 PHAF1/Protein broad-minded	ENOG503BDGV	S:(S) Function unknown	GO_component: GO:0005802 - trans-Golgi network [Evidence IEA];GO_process: GO:0043001 - Golgi to plasma membrane protein transport [Evidence IEA]
FUN_001098	FUN_001098-T1	mRNA	scaffold_1	21840038	21842449	-		hypothetical protein
FUN_001101	FUN_001101-T1	mRNA	scaffold_1	21871123	21886971	+	RBM39	RNA-binding protein 39			3139at6447	PF00076;PF15519	IPR000504 RNA recognition motif domain;IPR006509 Splicing factor, RBM39-like;IPR012677 Nucleotide-binding alpha-beta plait domain superfamily;IPR029123 Splicing factor RBM39, linker;IPR035979 RNA-binding domain superfamily	ENOG503BANI	A:(A) RNA processing and modification	GO_component: GO:0005634 - nucleus [Evidence IEA];GO_function: GO:0003723 - RNA binding [Evidence IEA];GO_function: GO:0003676 - nucleic acid binding [Evidence IEA];GO_process: GO:0006397 - mRNA processing [Evidence IEA]
FUN_001104	FUN_001104-T1	mRNA	scaffold_1	21924897	21926453	-	PDP1	[Pyruvate dehydrogenase [acetyl-transferring]]-phosphatase 1, mitochondrial		3.1.3.43	5107at6447	PF00481	IPR000222 PPM-type phosphatase, divalent cation binding;IPR001932 PPM-type phosphatase-like domain;IPR015655 Protein phosphatase 2C;IPR036457 PPM-type phosphatase-like domain superfamily	ENOG503BFJD	T:(T) Signal transduction mechanisms	GO_component: GO:0005739 - mitochondrion [Evidence IEA];GO_function: GO:0004722 - protein serine/threonine phosphatase activity [Evidence IEA];GO_function: GO:0043169 - cation binding [Evidence IEA];GO_function: GO:0004741 - [pyruvate dehydrogenase (acetyl-transferring)]-phosphatase activity [Evidence IEA];GO_process: GO:0006470 - protein dephosphorylation [Evidence IEA]
FUN_001105	FUN_001105-T1	mRNA	scaffold_1	21928461	21941603	+	NFS1	cysteine desulfurase		2.8.1.7	2718at6447	PF00266	IPR000192 Aminotransferase class V domain;IPR010240 Cysteine desulfurase IscS;IPR015421 Pyridoxal phosphate-dependent transferase, major domain;IPR015422 Pyridoxal phosphate-dependent transferase, small domain;IPR015424 Pyridoxal phosphate-dependent transferase;IPR016454 Cysteine desulfurase;IPR020578 Aminotransferase class-V, pyridoxal-phosphate binding site	ENOG503BC56	E:(E) Amino acid transport and metabolism	GO_component: GO:0005739 - mitochondrion [Evidence IEA];GO_component: GO:0005634 - nucleus [Evidence IEA];GO_component: GO:0005829 - cytosol [Evidence IEA];GO_function: GO:0031071 - cysteine desulfurase activity [Evidence IEA];GO_function: GO:0030170 - pyridoxal phosphate binding [Evidence IEA];GO_process: GO:0016226 - iron-sulfur cluster assembly [Evidence IEA];GO_process: GO:0044571 - [2Fe-2S] …
FUN_001106	FUN_001106-T1	mRNA	scaffold_1	21946699	21958723	+	GMPR2	GMP reductase 2		1.7.1.7	3296at6447	PF00478	IPR001093 IMP dehydrogenase/GMP reductase;IPR005993 GMP reductase;IPR013785 Aldolase-type TIM barrel;IPR015875 IMP dehydrogenase / GMP reductase, conserved site;IPR050139 Guanosine monophosphate reductase	ENOG503BAD2	F:(F) Nucleotide transport and metabolism	GO_component: GO:1902560 - GMP reductase complex [Evidence IEA];GO_function: GO:0016491 - oxidoreductase activity [Evidence IEA];GO_function: GO:0003824 - catalytic activity [Evidence IEA];GO_function: GO:0003920 - GMP reductase activity [Evidence IEA];GO_process: GO:0009117 - nucleotide metabolic process [Evidence IEA]
FUN_001107	FUN_001107-T1	mRNA	scaffold_1	21962716	21999035	-	RHPN2_2	Rhophilin-2				PF00595;PF02185;PF03097	IPR001478 PDZ domain;IPR004328 BRO1 domain;IPR011072 HR1 rho-binding domain;IPR036034 PDZ superfamily;IPR036274 HR1 repeat superfamily;IPR038499 BRO1 domain superfamily;IPR047138 Rhophilin-1/2	ENOG503BEU9	C:(C) Energy production and conversion	GO_function: GO:0005515 - protein binding [Evidence IEA];GO_process: GO:0007165 - signal transduction [Evidence IEA];GO_process: GO:0051497 - negative regulation of stress fiber assembly [Evidence IEA]
FUN_001113	FUN_001113-T1	mRNA	scaffold_1	22045853	22093625	+		hypothetical protein		2.3.2.27		PF00097;PF13445;PF13639;PF13923	IPR001293 Zinc finger, TRAF-type;IPR001841 Zinc finger, RING-type;IPR013010 Zinc finger, SIAH-type;IPR013083 Zinc finger, RING/FYVE/PHD-type;IPR017907 Zinc finger, RING-type, conserved site	ENOG503BGSU	O:(O) Posttranslational modification, protein turnover, chaperones	GO_component: GO:0098802 - plasma membrane signaling receptor complex [Evidence IEA];GO_function: GO:0008270 - zinc ion binding [Evidence IEA];GO_process: GO:0043122 - regulation of canonical NF-kappaB signal transduction [Evidence IEA]
FUN_001116	FUN_001116-T1	mRNA	scaffold_1	22116431	22122462	-		hypothetical protein					IPR026736 Protein virilizer	ENOG503B9A8	A:(A) RNA processing and modification;T:(T) Signal transduction mechanisms	GO_component: GO:0036396 - RNA N6-methyladenosine methyltransferase complex [Evidence IEA];GO_function: GO:0003723 - RNA binding [Evidence IEA];GO_process: GO:0080009 - obsolete mRNA methylation [Evidence IEA]
FUN_001117	FUN_001117-T1	mRNA	scaffold_1	22124490	22166299	-		hypothetical protein			1431at6447	PF15912	IPR026736 Protein virilizer;IPR031801 Virilizer, N-terminal	ENOG503B9A8	A:(A) RNA processing and modification;T:(T) Signal transduction mechanisms	GO_component: GO:0036396 - RNA N6-methyladenosine methyltransferase complex [Evidence IEA];GO_function: GO:0003723 - RNA binding [Evidence IEA];GO_process: GO:0080009 - obsolete mRNA methylation [Evidence IEA]
FUN_001118	FUN_001118-T1	mRNA	scaffold_1	22168254	22195271	+		hypothetical protein			8470at6447	PF00179	IPR000608 Ubiquitin-conjugating enzyme E2, catalytic core domain;IPR016135 Ubiquitin-conjugating enzyme/RWD-like	ENOG503BJ7I	O:(O) Posttranslational modification, protein turnover, chaperones
FUN_001119	FUN_001119-T1	mRNA	scaffold_1	22211496	22258471	-	PHAF1_2	Phagosome assembly factor 1			2825at6447	PF03676	IPR005373 Phagosome assembly factor 1;IPR039156 PHAF1/Protein broad-minded	ENOG503BDGV	S:(S) Function unknown	GO_component: GO:0005802 - trans-Golgi network [Evidence IEA];GO_process: GO:0043001 - Golgi to plasma membrane protein transport [Evidence IEA]
FUN_001121	FUN_001121-T1	mRNA	scaffold_1	22276747	22281257	-		hypothetical protein
FUN_001122	FUN_001122-T1	mRNA	scaffold_1	22281345	22281850	+		hypothetical protein
FUN_001123	FUN_001123-T1	mRNA	scaffold_1	22289727	22296712	+		hypothetical protein
FUN_001124	FUN_001124-T1	mRNA	scaffold_1	22297547	22298080	-		hypothetical protein
FUN_001125	FUN_001125-T1	mRNA	scaffold_1	22298253	22300235	-		hypothetical protein
FUN_001126	FUN_001126-T1	mRNA	scaffold_1	22314900	22370298	+		hypothetical protein			7718at6447	PF02312	IPR003417 Core-binding factor, beta subunit;IPR036552 Core-binding factor, beta subunit superfamily	ENOG503BB9R	K:(K) Transcription	GO_component: GO:0016513 - core-binding factor complex [Evidence IEA];GO_component: GO:0005634 - nucleus [Evidence IEA];GO_function: GO:0043565 - sequence-specific DNA binding [Evidence IEA];GO_function: GO:0003713 - transcription coactivator activity [Evidence IEA];GO_process: GO:0006357 - regulation of transcription by RNA polymerase II [Evidence IEA]
FUN_001126	FUN_001126-T2	mRNA	scaffold_1	22314900	22370298	+		hypothetical protein			7718at6447	PF02312	IPR003417 Core-binding factor, beta subunit;IPR036552 Core-binding factor, beta subunit superfamily	ENOG503BB9R	K:(K) Transcription	GO_component: GO:0016513 - core-binding factor complex [Evidence IEA];GO_component: GO:0005634 - nucleus [Evidence IEA];GO_function: GO:0043565 - sequence-specific DNA binding [Evidence IEA];GO_function: GO:0003713 - transcription coactivator activity [Evidence IEA];GO_process: GO:0006357 - regulation of transcription by RNA polymerase II [Evidence IEA]
FUN_001128	FUN_001128-T1	mRNA	scaffold_1	22400101	22400469	+		hypothetical protein
FUN_001130	FUN_001130-T1	mRNA	scaffold_1	22419999	22420451	+		hypothetical protein
FUN_001131	FUN_001131-T1	mRNA	scaffold_1	22426133	22427052	-	KATNB1_1	Katanin p80 WD40 repeat-containing subunit B1					IPR028021 Katanin p80 subunit, C-terminal	ENOG503B9Q6	D:(D) Cell cycle control, cell division, chromosome partitioning	GO_component: GO:0008352 - katanin complex [Evidence IEA];GO_function: GO:0008017 - microtubule binding [Evidence IEA];GO_process: GO:0007019 - microtubule depolymerization [Evidence IEA]
FUN_001133	FUN_001133-T1	mRNA	scaffold_1	22437744	22457359	-	KATNB1_2	Katanin p80 WD40 repeat-containing subunit B1				PF00400	IPR001680 WD40 repeat;IPR015943 WD40/YVTN repeat-like-containing domain superfamily;IPR019775 WD40 repeat, conserved site;IPR020472 G-protein beta WD-40 repeat;IPR036322 WD40-repeat-containing domain superfamily	ENOG503B9Q6	Z:(Z) Cytoskeleton	GO_component: GO:0008352 - katanin complex [Evidence IEA];GO_function: GO:0005515 - protein binding [Evidence IEA];GO_process: GO:0007019 - microtubule depolymerization [Evidence IEA]
FUN_001134	FUN_001134-T1	mRNA	scaffold_1	22469882	22470836	+		hypothetical protein			8022at6447	PF14956	IPR028108 Protein of unknown function DUF4505	ENOG503BPNJ	S:(S) Function unknown
FUN_001135	FUN_001135-T1	mRNA	scaffold_1	22478206	22493016	-		hypothetical protein			6382at6447	PF05007;PF06728	IPR007704 GPI mannosyltransferase 1	ENOG503BDX4	G:(G) Carbohydrate transport and metabolism	GO_component: GO:1990529 - glycosylphosphatidylinositol-mannosyltransferase I complex [Evidence IEA];GO_component: GO:0016020 - membrane [Evidence IEA];GO_function: GO:0000030 - mannosyltransferase activity [Evidence IEA];GO_function: GO:0004376 - glycolipid mannosyltransferase activity [Evidence IEA];GO_function: GO:0051751 - alpha-1,4-mannosyltransferase activity [Evidence IEA];GO_process: GO:0…				GT50
FUN_001135	FUN_001135-T2	mRNA	scaffold_1	22478206	22493016	-		hypothetical protein			6382at6447	PF05007;PF06728	IPR007704 GPI mannosyltransferase 1	ENOG503BDX4	G:(G) Carbohydrate transport and metabolism	GO_component: GO:1990529 - glycosylphosphatidylinositol-mannosyltransferase I complex [Evidence IEA];GO_component: GO:0016020 - membrane [Evidence IEA];GO_function: GO:0000030 - mannosyltransferase activity [Evidence IEA];GO_function: GO:0004376 - glycolipid mannosyltransferase activity [Evidence IEA];GO_function: GO:0051751 - alpha-1,4-mannosyltransferase activity [Evidence IEA];GO_process: GO:0…				GT50
FUN_001139	FUN_001139-T1	mRNA	scaffold_1	22485035	22545227	+	ASTE1	Protein asteroid 1				PF00752	IPR006085 XPG, N-terminal;IPR026832 Asteroid;IPR029060 PIN-like domain superfamily	ENOG503BDJY	S:(S) Function unknown	GO_function: GO:0004518 - nuclease activity [Evidence IEA]
FUN_001137	FUN_001137-T1	mRNA	scaffold_1	22510882	22534951	-	KATNB1_3	Katanin p80 WD40 repeat-containing subunit B1				PF00400;PF12894	IPR001680 WD40 repeat;IPR015943 WD40/YVTN repeat-like-containing domain superfamily;IPR019775 WD40 repeat, conserved site;IPR020472 G-protein beta WD-40 repeat;IPR028021 Katanin p80 subunit, C-terminal;IPR036322 WD40-repeat-containing domain superfamily	ENOG503B9Q6	Z:(Z) Cytoskeleton	GO_component: GO:0008352 - katanin complex [Evidence IEA];GO_function: GO:0005515 - protein binding [Evidence IEA];GO_function: GO:0008017 - microtubule binding [Evidence IEA];GO_process: GO:0007019 - microtubule depolymerization [Evidence IEA]
FUN_001138	FUN_001138-T1	mRNA	scaffold_1	22537308	22538261	+		hypothetical protein			8022at6447	PF14956	IPR028108 Protein of unknown function DUF4505	ENOG503BPNJ	S:(S) Function unknown
FUN_001140	FUN_001140-T1	mRNA	scaffold_1	22565793	22566519	-		hypothetical protein
FUN_001141	FUN_001141-T1	mRNA	scaffold_1	22596232	22599119	-		hypothetical protein
FUN_001142	FUN_001142-T1	mRNA	scaffold_1	22599152	22599440	-		hypothetical protein
FUN_001143	FUN_001143-T1	mRNA	scaffold_1	22599677	22600063	-		hypothetical protein
FUN_001144	FUN_001144-T1	mRNA	scaffold_1	22614895	22617836	-		hypothetical protein					IPR036259 MFS transporter superfamily	ENOG503C1BE	G:(G) Carbohydrate transport and metabolism
FUN_001145	FUN_001145-T1	mRNA	scaffold_1	22622612	22627044	-		hypothetical protein					IPR011701 Major facilitator superfamily;IPR020846 Major facilitator superfamily domain;IPR036259 MFS transporter superfamily;IPR050382 Major Facilitator Superfamily Sodium/Anion Cotransporter	ENOG503BBSD	G:(G) Carbohydrate transport and metabolism	GO_function: GO:0022857 - transmembrane transporter activity [Evidence IEA];GO_process: GO:0055085 - transmembrane transport [Evidence IEA]
FUN_001146	FUN_001146-T1	mRNA	scaffold_1	22632615	22666816	+		hypothetical protein		3.1.3.4		PF01569	IPR000326 Phosphatidic acid phosphatase type 2/haloperoxidase;IPR036938 Phosphatidic acid phosphatase type 2/haloperoxidase superfamily;IPR043216 Phosphatidate (PA) phosphatase-related	ENOG503BC3U	I:(I) Lipid transport and metabolism	GO_component: GO:0016020 - membrane [Evidence IEA];GO_component: GO:0005886 - plasma membrane [Evidence IEA];GO_function: GO:0008195 - phosphatidate phosphatase activity [Evidence IEA];GO_process: GO:0007165 - signal transduction [Evidence IEA];GO_process: GO:0006644 - phospholipid metabolic process [Evidence IEA];GO_process: GO:0046839 - phospholipid dephosphorylation [Evidence IEA]
FUN_001146	FUN_001146-T2	mRNA	scaffold_1	22632615	22666816	+		hypothetical protein		3.1.3.4		PF01569	IPR000326 Phosphatidic acid phosphatase type 2/haloperoxidase;IPR036938 Phosphatidic acid phosphatase type 2/haloperoxidase superfamily;IPR043216 Phosphatidate (PA) phosphatase-related	ENOG503BC3U	I:(I) Lipid transport and metabolism	GO_component: GO:0016020 - membrane [Evidence IEA];GO_component: GO:0005886 - plasma membrane [Evidence IEA];GO_function: GO:0008195 - phosphatidate phosphatase activity [Evidence IEA];GO_process: GO:0007165 - signal transduction [Evidence IEA];GO_process: GO:0006644 - phospholipid metabolic process [Evidence IEA];GO_process: GO:0046839 - phospholipid dephosphorylation [Evidence IEA]
FUN_001149	FUN_001149-T1	mRNA	scaffold_1	22772354	22774524	-		hypothetical protein
FUN_001150	FUN_001150-T1	mRNA	scaffold_1	22774576	22774998	-		hypothetical protein
FUN_001151	FUN_001151-T1	mRNA	scaffold_1	22775286	22776044	-		hypothetical protein
FUN_001152	FUN_001152-T1	mRNA	scaffold_1	22784009	22785991	-		hypothetical protein
FUN_001153	FUN_001153-T1	mRNA	scaffold_1	22810934	22811726	+		hypothetical protein
FUN_001154	FUN_001154-T1	mRNA	scaffold_1	22811734	22814835	+		hypothetical protein
FUN_001155	FUN_001155-T1	mRNA	scaffold_1	22814842	22815041	+		hypothetical protein
FUN_001159	FUN_001159-T1	mRNA	scaffold_1	22934153	22935226	-		hypothetical protein
FUN_001160	FUN_001160-T1	mRNA	scaffold_1	22949496	22954375	+		hypothetical protein
FUN_001161	FUN_001161-T1	mRNA	scaffold_1	23059359	23059928	-		hypothetical protein
FUN_094531	FUN_094531-T1	mRNA	scaffold_1	23125163	23383081	+		hypothetical protein		2.3.2.27		PF00097;PF13445;PF22586	IPR000315 B-box-type zinc finger;IPR001841 Zinc finger, RING-type;IPR011042 Six-bladed beta-propeller, TolB-like;IPR013083 Zinc finger, RING/FYVE/PHD-type;IPR017907 Zinc finger, RING-type, conserved site;IPR027370 Zinc finger, RING-type, eukaryotic;IPR047153 TRIM45/56/19-like	ENOG503AM9G	O:(O) Posttranslational modification, protein turnover, chaperones	GO_function: GO:0008270 - zinc ion binding [Evidence IEA]
FUN_094531	FUN_094531-T2	mRNA	scaffold_1	23125163	23383081	+		hypothetical protein				PF00650	IPR001251 CRAL-TRIO lipid binding domain;IPR036273 CRAL/TRIO, N-terminal domain superfamily;IPR036865 CRAL-TRIO lipid binding domain superfamily;IPR052578 Phosphatidylinositol Transfer CRAL-TRIO Domain-Containing Protein	ENOG503CNYN	I:(I) Lipid transport and metabolism	GO_function: GO:0008526 - phosphatidylinositol transfer activity [Evidence IEA]
FUN_094531	FUN_094531-T3	mRNA	scaffold_1	23125163	23383081	+		hypothetical protein		2.3.2.27			IPR000315 B-box-type zinc finger;IPR011042 Six-bladed beta-propeller, TolB-like;IPR047153 TRIM45/56/19-like	ENOG503BFJH	O:(O) Posttranslational modification, protein turnover, chaperones	GO_function: GO:0008270 - zinc ion binding [Evidence IEA]
FUN_001162	FUN_001162-T1	mRNA	scaffold_1	23147050	23445626	-	ST14_1	Suppressor of tumorigenicity 14 protein, variant 2				PF00057	IPR002172 Low-density lipoprotein (LDL) receptor class A repeat;IPR036055 LDL receptor-like superfamily;IPR042333 LRAD2/Mig-13-like	ENOG503B9XY	E:(E) Amino acid transport and metabolism	GO_function: GO:0005515 - protein binding [Evidence IEA]
FUN_001162	FUN_001162-T2	mRNA	scaffold_1	23147050	23445626	-	ST14_1	Suppressor of tumorigenicity 14 protein				PF00057	IPR002172 Low-density lipoprotein (LDL) receptor class A repeat;IPR036055 LDL receptor-like superfamily;IPR042333 LRAD2/Mig-13-like	ENOG503B9XY	E:(E) Amino acid transport and metabolism	GO_function: GO:0005515 - protein binding [Evidence IEA]
FUN_094532	FUN_094532-T1	mRNA	scaffold_1	23357816	23359519	+		hypothetical protein		2.3.2.27			IPR011042 Six-bladed beta-propeller, TolB-like;IPR050952 Tripartite Motif and NHL Repeat Containing E3 Ligases	ENOG50KOG2177	O:(O) Posttranslational modification, protein turnover, chaperones	GO_function: GO:0061630 - ubiquitin protein ligase activity [Evidence IEA];GO_process: GO:0000209 - protein polyubiquitination [Evidence IEA];GO_process: GO:0043161 - proteasome-mediated ubiquitin-dependent protein catabolic process [Evidence IEA]
FUN_001164	FUN_001164-T1	mRNA	scaffold_1	23505681	23506132	-		hypothetical protein
FUN_001165	FUN_001165-T1	mRNA	scaffold_1	23512895	23513509	-		hypothetical protein
FUN_001166	FUN_001166-T1	mRNA	scaffold_1	23514622	23515449	-		hypothetical protein
FUN_001170	FUN_001170-T1	mRNA	scaffold_1	23587051	23588148	+		hypothetical protein				PF00069;PF07714	IPR000719 Protein kinase domain;IPR011009 Protein kinase-like domain superfamily	ENOG503GDNW	T:(T) Signal transduction mechanisms	GO_component: GO:0005886 - plasma membrane [Evidence IEA];GO_function: GO:0005524 - ATP binding [Evidence IEA];GO_function: GO:0004672 - protein kinase activity [Evidence IEA];GO_process: GO:0006468 - protein phosphorylation [Evidence IEA]
FUN_001174	FUN_001174-T1	mRNA	scaffold_1	23647631	23648452	+		hypothetical protein
FUN_001180	FUN_001180-T1	mRNA	scaffold_1	23771210	23772857	-		hypothetical protein
FUN_001185	FUN_001185-T1	mRNA	scaffold_1	23890435	23890590	-		hypothetical protein
FUN_001186	FUN_001186-T1	mRNA	scaffold_1	23931781	23960453	-		hypothetical protein		3.4.21.109		PF00057	IPR002172 Low-density lipoprotein (LDL) receptor class A repeat;IPR036055 LDL receptor-like superfamily;IPR042333 LRAD2/Mig-13-like	ENOG503CNIJ	E:(E) Amino acid transport and metabolism	GO_function: GO:0005515 - protein binding [Evidence IEA]
FUN_001187	FUN_001187-T1	mRNA	scaffold_1	23979932	23999156	-		hypothetical protein			4263at6447	PF00096;PF23611	IPR013087 Zinc finger C2H2-type;IPR036236 Zinc finger C2H2 superfamily;IPR050589 Ikaros C2H2-type zinc-finger;IPR056438 CTCF-like, C2H2 zinc finger	ENOG503BAC7	K:(K) Transcription	GO_function: GO:0000978 - RNA polymerase II cis-regulatory region sequence-specific DNA binding [Evidence IEA];GO_function: GO:0003700 - DNA-binding transcription factor activity [Evidence IEA];GO_process: GO:0006357 - regulation of transcription by RNA polymerase II [Evidence IEA]
FUN_001187	FUN_001187-T2	mRNA	scaffold_1	23979932	23999156	-		hypothetical protein			4263at6447	PF00096;PF23611	IPR013087 Zinc finger C2H2-type;IPR036236 Zinc finger C2H2 superfamily;IPR050589 Ikaros C2H2-type zinc-finger;IPR056438 CTCF-like, C2H2 zinc finger	ENOG503BAC7	K:(K) Transcription	GO_function: GO:0000978 - RNA polymerase II cis-regulatory region sequence-specific DNA binding [Evidence IEA];GO_function: GO:0003700 - DNA-binding transcription factor activity [Evidence IEA];GO_process: GO:0006357 - regulation of transcription by RNA polymerase II [Evidence IEA]
FUN_001193	FUN_001193-T1	mRNA	scaffold_1	24169573	24169799	-		hypothetical protein
FUN_001195	FUN_001195-T1	mRNA	scaffold_1	24196351	24196565	+		hypothetical protein
FUN_001196	FUN_001196-T1	mRNA	scaffold_1	24198325	24198602	+		hypothetical protein
FUN_001197	FUN_001197-T1	mRNA	scaffold_1	24212729	24217552	-		hypothetical protein		3.4.21.109		PF00057	IPR002172 Low-density lipoprotein (LDL) receptor class A repeat;IPR036055 LDL receptor-like superfamily;IPR050685 Low-density lipoprotein receptor	ENOG503CNIJ	E:(E) Amino acid transport and metabolism	GO_component: GO:0005886 - plasma membrane [Evidence IEA];GO_function: GO:0005515 - protein binding [Evidence IEA]
FUN_001200	FUN_001200-T1	mRNA	scaffold_1	24221670	24233966	-		hypothetical protein
FUN_001201	FUN_001201-T1	mRNA	scaffold_1	24253314	24258103	+	FBXO31_1	F-box only protein 31				PF12014	IPR045048 F-box only protein 31/39	ENOG503BCT0	S:(S) Function unknown
FUN_001202	FUN_001202-T1	mRNA	scaffold_1	24284316	24286854	-		hypothetical protein		3.4.17.2			IPR000834 Peptidase M14, carboxypeptidase A	ENOG503BA6U	O:(O) Posttranslational modification, protein turnover, chaperones	GO_component: GO:0005615 - extracellular space [Evidence IEA];GO_function: GO:0008270 - zinc ion binding [Evidence IEA];GO_function: GO:0004181 - metallocarboxypeptidase activity [Evidence IEA];GO_process: GO:0006508 - proteolysis [Evidence IEA]			M14A
FUN_001203	FUN_001203-T1	mRNA	scaffold_1	24300812	24343670	-	SLC6A2_1	Sodium-dependent noradrenaline transporter					IPR000834 Peptidase M14, carboxypeptidase A;IPR036990 Metallocarboxypeptidase-like, propeptide	ENOG503BA4J	P:(P) Inorganic ion transport and metabolism	GO_component: GO:0005615 - extracellular space [Evidence IEA];GO_function: GO:0008270 - zinc ion binding [Evidence IEA];GO_function: GO:0004181 - metallocarboxypeptidase activity [Evidence IEA];GO_process: GO:0006508 - proteolysis [Evidence IEA]			M14A
FUN_001205	FUN_001205-T1	mRNA	scaffold_1	24329906	24331309	-		hypothetical protein
FUN_001206	FUN_001206-T1	mRNA	scaffold_1	24331520	24333967	-		hypothetical protein
FUN_001207	FUN_001207-T1	mRNA	scaffold_1	24334045	24335290	-		hypothetical protein
FUN_001208	FUN_001208-T1	mRNA	scaffold_1	24335343	24339874	-		hypothetical protein
FUN_001209	FUN_001209-T1	mRNA	scaffold_1	24351895	24352815	+		hypothetical protein
FUN_001211	FUN_001211-T1	mRNA	scaffold_1	24367906	24372326	+		hypothetical protein
FUN_001212	FUN_001212-T1	mRNA	scaffold_1	24376608	24384426	+		hypothetical protein
FUN_001213	FUN_001213-T1	mRNA	scaffold_1	24386093	24389161	+		hypothetical protein
FUN_001214	FUN_001214-T1	mRNA	scaffold_1	24412676	24424258	+		hypothetical protein			8183at6447	PF04969	IPR007052 CS domain;IPR008978 HSP20-like chaperone;IPR037898 NudC family	ENOG503BAUI	T:(T) Signal transduction mechanisms	GO_component: GO:0005737 - cytoplasm [Evidence IEA];GO_function: GO:0051082 - unfolded protein binding [Evidence IEA];GO_process: GO:0006457 - protein folding [Evidence IEA]
FUN_001215	FUN_001215-T1	mRNA	scaffold_1	24448698	24456938	+	TLK2_1	Serine/threonine-protein kinase tousled-like 2		2.7.11.1		PF00069;PF07714	IPR000719 Protein kinase domain;IPR008271 Serine/threonine-protein kinase, active site;IPR011009 Protein kinase-like domain superfamily;IPR017441 Protein kinase, ATP binding site	ENOG503B9GQ	T:(T) Signal transduction mechanisms	GO_component: GO:0005634 - nucleus [Evidence IEA];GO_function: GO:0004674 - protein serine/threonine kinase activity [Evidence IEA];GO_function: GO:0005524 - ATP binding [Evidence IEA];GO_function: GO:0004672 - protein kinase activity [Evidence IEA];GO_process: GO:0007059 - chromosome segregation [Evidence IEA];GO_process: GO:0018105 - peptidyl-serine phosphorylation [Evidence IEA];GO_process: GO…
FUN_001220	FUN_001220-T1	mRNA	scaffold_1	24601814	24602776	-		hypothetical protein
FUN_001224	FUN_001224-T1	mRNA	scaffold_1	24650778	24696649	+	GRM3_1	Metabotropic glutamate receptor 3				PF00003;PF01094;PF07562	IPR000162 GPCR, family 3, metabotropic glutamate receptor;IPR000337 GPCR, family 3;IPR001828 Receptor, ligand binding region;IPR011500 GPCR, family 3, nine cysteines domain;IPR017978 GPCR family 3, C-terminal;IPR017979 GPCR, family 3, conserved site;IPR028082 Periplasmic binding protein-like I;IPR038550 GPCR, family 3, nine cysteines domain superfamily;IPR050726 Metabotropic Glutamate Receptor	ENOG503B9DN	T:(T) Signal transduction mechanisms	GO_component: GO:0016020 - membrane [Evidence IEA];GO_function: GO:0004930 - G protein-coupled receptor activity [Evidence IEA];GO_process: GO:0007186 - G protein-coupled receptor signaling pathway [Evidence IEA]
FUN_001231	FUN_001231-T1	mRNA	scaffold_1	24923399	24939557	-		hypothetical protein				PF00076	IPR000504 RNA recognition motif domain;IPR012677 Nucleotide-binding alpha-beta plait domain superfamily;IPR013087 Zinc finger C2H2-type;IPR035979 RNA-binding domain superfamily;IPR051186 RRM HNRPC family, RALY subfamily	ENOG503CPC6	A:(A) RNA processing and modification	GO_component: GO:0005634 - nucleus [Evidence IEA];GO_function: GO:0003723 - RNA binding [Evidence IEA];GO_function: GO:0003676 - nucleic acid binding [Evidence IEA]
FUN_001232	FUN_001232-T1	mRNA	scaffold_1	24941444	24943095	+		hypothetical protein				PF04117	IPR007248 Mpv17/PMP22	ENOG503BQPN	S:(S) Function unknown	GO_component: GO:0005739 - mitochondrion [Evidence IEA];GO_component: GO:0016020 - membrane [Evidence IEA];GO_component: GO:0005737 - cytoplasm [Evidence IEA];GO_process: GO:0061668 - mitochondrial ribosome assembly [Evidence IEA]
FUN_001235	FUN_001235-T1	mRNA	scaffold_1	24953211	24954880	-		hypothetical protein
FUN_001236	FUN_001236-T1	mRNA	scaffold_1	24955005	24982056	+	FBXO31_2	F-box only protein 31				PF00646;PF12014;PF12937	IPR001810 F-box domain;IPR036047 F-box-like domain superfamily;IPR045048 F-box only protein 31/39	ENOG503BCT0	S:(S) Function unknown	GO_function: GO:0005515 - protein binding [Evidence IEA]
FUN_001237	FUN_001237-T1	mRNA	scaffold_1	24984398	24987531	-		hypothetical protein
FUN_001238	FUN_001238-T1	mRNA	scaffold_1	24990052	24999468	-	DTNBP1_1	Dysbindin					IPR007531 Dysbindin	ENOG503BAV9	S:(S) Function unknown	GO_component: GO:0005737 - cytoplasm [Evidence IEA];GO_process: GO:0006469 - negative regulation of protein kinase activity [Evidence IEA]
FUN_001239	FUN_001239-T1	mRNA	scaffold_1	25001578	25003113	+		hypothetical protein
FUN_001242	FUN_001242-T1	mRNA	scaffold_1	25068211	25087158	+	RREB1	Ras responsive element binding protein				PF00096;PF13894;PF13909;PF13912	IPR013087 Zinc finger C2H2-type;IPR036236 Zinc finger C2H2 superfamily;IPR052795 Ras-responsive element-binding protein 1	ENOG503BETZ	K:(K) Transcription	GO_component: GO:0005634 - nucleus [Evidence IEA];GO_function: GO:0001228 - DNA-binding transcription activator activity, RNA polymerase II-specific [Evidence IEA];GO_function: GO:0000978 - RNA polymerase II cis-regulatory region sequence-specific DNA binding [Evidence IEA];GO_process: GO:0006357 - regulation of transcription by RNA polymerase II [Evidence IEA]
FUN_001244	FUN_001244-T1	mRNA	scaffold_1	25106182	25107800	+		hypothetical protein				PF00001;PF10324	IPR000276 G protein-coupled receptor, rhodopsin-like;IPR017452 GPCR, rhodopsin-like, 7TM;IPR052954 GPCR_Ligand_Interaction	ENOG50	O:(O) Posttranslational modification, protein turnover, chaperones	GO_component: GO:0016020 - membrane [Evidence IEA];GO_function: GO:0004930 - G protein-coupled receptor activity [Evidence IEA];GO_process: GO:0007186 - G protein-coupled receptor signaling pathway [Evidence IEA]
FUN_001245	FUN_001245-T1	mRNA	scaffold_1	25110029	25139323	-	SLC6A2_2	Sodium-dependent noradrenaline transporter				PF00246	IPR000834 Peptidase M14, carboxypeptidase A	ENOG503BA4J	P:(P) Inorganic ion transport and metabolism	GO_component: GO:0005615 - extracellular space [Evidence IEA];GO_function: GO:0008270 - zinc ion binding [Evidence IEA];GO_function: GO:0004181 - metallocarboxypeptidase activity [Evidence IEA];GO_process: GO:0006508 - proteolysis [Evidence IEA]			M14A
FUN_001246	FUN_001246-T1	mRNA	scaffold_1	25168924	25169395	+		hypothetical protein
FUN_001247	FUN_001247-T1	mRNA	scaffold_1	25190162	25191111	+		hypothetical protein
FUN_001248	FUN_001248-T1	mRNA	scaffold_1	25208189	25216317	+		hypothetical protein					IPR042802 Ankyrin repeat domain-containing protein 22
FUN_001249	FUN_001249-T1	mRNA	scaffold_1	25228375	25229244	-		hypothetical protein
FUN_001251	FUN_001251-T1	mRNA	scaffold_1	25239989	25241236	-		hypothetical protein
FUN_001252	FUN_001252-T1	mRNA	scaffold_1	25241310	25243335	-		hypothetical protein
FUN_001253	FUN_001253-T1	mRNA	scaffold_1	25243356	25244961	-		hypothetical protein
FUN_001254	FUN_001254-T1	mRNA	scaffold_1	25245604	25252279	+		hypothetical protein
FUN_001255	FUN_001255-T1	mRNA	scaffold_1	25259427	25291958	+		hypothetical protein
FUN_001255	FUN_001255-T2	mRNA	scaffold_1	25259427	25291958	+		hypothetical protein
FUN_001259	FUN_001259-T1	mRNA	scaffold_1	25322419	25587352	+		hypothetical protein				PF00412	IPR001781 Zinc finger, LIM-type;IPR047172 Ajuba-like;IPR047245 Ajuba-like, LIM domain 1;IPR047247 Ajuba-like, LIM domain 2;IPR047248 Ajuba-like, LIM domain 3	ENOG503BFZ8	T:(T) Signal transduction mechanisms	GO_component: GO:0005634 - nucleus [Evidence IEA];GO_component: GO:0005667 - transcription regulator complex [Evidence IEA];GO_component: GO:0005912 - adherens junction [Evidence IEA];GO_component: GO:0000932 - P-body [Evidence IEA];GO_function: GO:0003714 - transcription corepressor activity [Evidence IEA];GO_process: GO:0035331 - negative regulation of hippo signaling [Evidence IEA];GO_process:…
FUN_001259	FUN_001259-T2	mRNA	scaffold_1	25322419	25587352	+		hypothetical protein			4726at6447	PF00412	IPR001781 Zinc finger, LIM-type;IPR047172 Ajuba-like;IPR047245 Ajuba-like, LIM domain 1;IPR047247 Ajuba-like, LIM domain 2	ENOG503BFZ8	T:(T) Signal transduction mechanisms	GO_component: GO:0005634 - nucleus [Evidence IEA];GO_component: GO:0005667 - transcription regulator complex [Evidence IEA];GO_component: GO:0005912 - adherens junction [Evidence IEA];GO_component: GO:0000932 - P-body [Evidence IEA];GO_function: GO:0003714 - transcription corepressor activity [Evidence IEA];GO_process: GO:0035331 - negative regulation of hippo signaling [Evidence IEA];GO_process:…
FUN_001260	FUN_001260-T1	mRNA	scaffold_1	25400428	25419724	-	MORN1_1	Alsin			6140at6447	PF02493	IPR003409 MORN repeat	ENOG503BJZX	E:(E) Amino acid transport and metabolism
FUN_001261	FUN_001261-T1	mRNA	scaffold_1	25426165	25648986	+	NECAB1	N-terminal EF-hand calcium-binding protein 1				PF03992	IPR007138 Antibiotic biosynthesis monooxygenase domain;IPR011008 Dimeric alpha-beta barrel;IPR039862 N-terminal EF-hand calcium binding protein 1/2/3	ENOG503BB18	T:(T) Signal transduction mechanisms	GO_component: GO:0005737 - cytoplasm [Evidence IEA];GO_process: GO:0042984 - regulation of amyloid precursor protein biosynthetic process [Evidence IEA]
FUN_094533	FUN_094533-T1	mRNA	scaffold_1	25459268	25464076	-		hypothetical protein				PF05038	IPR007732 Cytochrome b558 alpha-subunit	ENOG503BNJF	C:(C) Energy production and conversion	GO_function: GO:0020037 - heme binding [Evidence IEA]
FUN_001262	FUN_001262-T1	mRNA	scaffold_1	25483895	25694045	+		hypothetical protein					IPR007070 GPI ethanolamine phosphate transferase 1;IPR017852 GPI ethanolamine phosphate transferase 1, C-terminal	ENOG503B9XA	T:(T) Signal transduction mechanisms	GO_component: GO:0005789 - endoplasmic reticulum membrane [Evidence IEA];GO_function: GO:0051377 - mannose-ethanolamine phosphotransferase activity [Evidence IEA];GO_function: GO:0016740 - transferase activity [Evidence IEA];GO_process: GO:0006506 - GPI anchor biosynthetic process [Evidence IEA]
FUN_094534	FUN_094534-T1	mRNA	scaffold_1	25729336	25732039	-		hypothetical protein				PF00097;PF00643;PF13445;PF22586	IPR000315 B-box-type zinc finger;IPR001258 NHL repeat;IPR001841 Zinc finger, RING-type;IPR011042 Six-bladed beta-propeller, TolB-like;IPR013083 Zinc finger, RING/FYVE/PHD-type;IPR017907 Zinc finger, RING-type, conserved site;IPR027370 Zinc finger, RING-type, eukaryotic;IPR047153 TRIM45/56/19-like	ENOG50	O:(O) Posttranslational modification, protein turnover, chaperones	GO_function: GO:0005515 - protein binding [Evidence IEA];GO_function: GO:0008270 - zinc ion binding [Evidence IEA]
FUN_094535	FUN_094535-T1	mRNA	scaffold_1	25731745	25765603	-		hypothetical protein
FUN_001264	FUN_001264-T1	mRNA	scaffold_1	25763846	25765019	+		hypothetical protein
FUN_001266	FUN_001266-T1	mRNA	scaffold_1	25806889	25814881	-		hypothetical protein				PF01205	IPR000836 Phosphoribosyltransferase domain;IPR001498 Impact, N-terminal;IPR020568 Ribosomal protein uS5 domain 2-type superfamily;IPR023582 Impact family;IPR029057 Phosphoribosyltransferase-like;IPR036956 Impact, N-terminal domain superfamily	ENOG503BE0H	S:(S) Function unknown	GO_component: GO:0005737 - cytoplasm [Evidence IEA];GO_process: GO:0006446 - regulation of translational initiation [Evidence IEA];GO_process: GO:0140469 - GCN2-mediated signaling [Evidence IEA]
FUN_001267	FUN_001267-T1	mRNA	scaffold_1	25816011	25817787	-		hypothetical protein		2.4.2.7			IPR000836 Phosphoribosyltransferase domain;IPR029057 Phosphoribosyltransferase-like;IPR050054 Uracil phosphoribosyltransferase/Adenine phosphoribosyltransferase	ENOG503BREW	F:(F) Nucleotide transport and metabolism	GO_component: GO:0005737 - cytoplasm [Evidence IEA];GO_function: GO:0002055 - adenine binding [Evidence IEA];GO_function: GO:0003999 - adenine phosphoribosyltransferase activity [Evidence IEA];GO_function: GO:0016208 - AMP binding [Evidence IEA];GO_process: GO:0006168 - adenine salvage [Evidence IEA];GO_process: GO:0044209 - AMP salvage [Evidence IEA]
FUN_001269	FUN_001269-T1	mRNA	scaffold_1	25836151	25838203	-		hypothetical protein
FUN_001271	FUN_001271-T1	mRNA	scaffold_1	25839819	25840263	+		hypothetical protein
FUN_001272	FUN_001272-T1	mRNA	scaffold_1	25858215	25864898	+		hypothetical protein					IPR000175 Sodium:neurotransmitter symporter;IPR037272 Sodium:neurotransmitter symporter superfamily	ENOG503BBRV	T:(T) Signal transduction mechanisms	GO_component: GO:0016020 - membrane [Evidence IEA];GO_component: GO:0005886 - plasma membrane [Evidence IEA];GO_function: GO:0005283 - amino acid:sodium symporter activity [Evidence IEA];GO_process: GO:0089718 - amino acid import across plasma membrane [Evidence IEA];GO_process: GO:0071705 - nitrogen compound transport [Evidence IEA];GO_process: GO:0035725 - sodium ion transmembrane transport [Ev…
FUN_001275	FUN_001275-T1	mRNA	scaffold_1	25906301	25908940	-		hypothetical protein
FUN_001276	FUN_001276-T1	mRNA	scaffold_1	25919893	25921844	-	CYP3A4_2	Cytochrome P450 3A4					IPR001128 Cytochrome P450;IPR036396 Cytochrome P450 superfamily;IPR050705 Cytochrome P450 3A	ENOG503BF8S	Q:(Q) Secondary metabolites biosynthesis, transport and catabolism	GO_function: GO:0008395 - steroid hydroxylase activity [Evidence IEA];GO_function: GO:0016705 - oxidoreductase activity, acting on paired donors, with incorporation or reduction of molecular oxygen [Evidence IEA];GO_function: GO:0020037 - heme binding [Evidence IEA];GO_function: GO:0004497 - monooxygenase activity [Evidence IEA];GO_function: GO:0005506 - iron ion binding [Evidence IEA]
FUN_001277	FUN_001277-T1	mRNA	scaffold_1	25941074	25942013	+		hypothetical protein
FUN_001278	FUN_001278-T1	mRNA	scaffold_1	25946163	25953347	+		hypothetical protein						ENOG502IX2E
FUN_001279	FUN_001279-T1	mRNA	scaffold_1	25961704	25969041	+		hypothetical protein				PF06206	IPR010404 Chromophore lyase CpcT/CpeT;IPR038672 Chromophore lyase CpcT/CpeT superfamily	ENOG501SGF1	S:(S) Function unknown	GO_function: GO:0016829 - lyase activity [Evidence IEA];GO_process: GO:0017009 - protein-phycocyanobilin linkage [Evidence IEA]
FUN_001280	FUN_001280-T1	mRNA	scaffold_1	25982629	25983177	+		hypothetical protein
FUN_001281	FUN_001281-T1	mRNA	scaffold_1	25985453	25994850	+		hypothetical protein				PF01758	IPR002657 Bile acid:sodium symporter/arsenical resistance protein Acr3;IPR004710 Bile acid:sodium symporter;IPR038770 Sodium/solute symporter superfamily	ENOG503BGA5	P:(P) Inorganic ion transport and metabolism	GO_component: GO:0016020 - membrane [Evidence IEA]
FUN_001283	FUN_001283-T1	mRNA	scaffold_1	26047322	26067642	-		hypothetical protein					IPR000175 Sodium:neurotransmitter symporter;IPR037272 Sodium:neurotransmitter symporter superfamily	ENOG503BBRV	T:(T) Signal transduction mechanisms	GO_component: GO:0016020 - membrane [Evidence IEA];GO_component: GO:0005886 - plasma membrane [Evidence IEA];GO_process: GO:0071705 - nitrogen compound transport [Evidence IEA];GO_process: GO:0035725 - sodium ion transmembrane transport [Evidence IEA];GO_process: GO:0006865 - amino acid transport [Evidence IEA]
FUN_001285	FUN_001285-T1	mRNA	scaffold_1	26081058	26084074	-	GIMAP4_1	GTPase IMAP member 4				PF01926;PF04548	IPR006703 AIG1-type guanine nucleotide-binding (G) domain;IPR027417 P-loop containing nucleoside triphosphate hydrolase;IPR045058 GTPase GIMA/IAN/Toc	ENOG503BSPI	S:(S) Function unknown	GO_function: GO:0005525 - GTP binding [Evidence IEA]
FUN_001288	FUN_001288-T1	mRNA	scaffold_1	26098111	26102561	-		hypothetical protein				PF00010	IPR011598 Myc-type, basic helix-loop-helix (bHLH) domain;IPR036638 Helix-loop-helix DNA-binding domain superfamily			GO_function: GO:0046983 - protein dimerization activity [Evidence IEA]
FUN_001289	FUN_001289-T1	mRNA	scaffold_1	26140897	26145152	+		hypothetical protein				PF06206	IPR010404 Chromophore lyase CpcT/CpeT;IPR038672 Chromophore lyase CpcT/CpeT superfamily	ENOG501SGF1	S:(S) Function unknown	GO_function: GO:0016829 - lyase activity [Evidence IEA];GO_process: GO:0017009 - protein-phycocyanobilin linkage [Evidence IEA]
FUN_001291	FUN_001291-T1	mRNA	scaffold_2	8213	17108	+		hypothetical protein
FUN_001292	FUN_001292-T1	mRNA	scaffold_2	90079	93828	-		hypothetical protein
FUN_001293	FUN_001293-T1	mRNA	scaffold_2	98142	99280	+		hypothetical protein
FUN_001295	FUN_001295-T1	mRNA	scaffold_2	102804	113883	+	KDM4B_1	Lysine-specific demethylase 4B			1396at6447	PF02373;PF02375	IPR003347 JmjC domain;IPR003349 JmjN domain	ENOG503B95Z	K:(K) Transcription	GO_component: GO:0005634 - nucleus [Evidence IEA];GO_component: GO:0000785 - chromatin [Evidence IEA];GO_function: GO:0051864 - histone H3K36 demethylase activity [Evidence IEA];GO_function: GO:0032452 - histone demethylase activity [Evidence IEA];GO_function: GO:0032454 - histone H3K9 demethylase activity [Evidence IEA];GO_process: GO:0006338 - chromatin remodeling [Evidence IEA];GO_process: GO:…
FUN_001296	FUN_001296-T1	mRNA	scaffold_2	141450	251820	-	PHACTR1_1	Repeat in CG10860, human KIAA0680 and C				PF02755	IPR004018 RPEL repeat	ENOG503BJYS	S:(S) Function unknown	GO_function: GO:0003779 - actin binding [Evidence IEA];GO_process: GO:0030036 - actin cytoskeleton organization [Evidence IEA]
FUN_001296	FUN_001296-T2	mRNA	scaffold_2	141450	251820	-	PHACTR1_1	Repeat in CG10860, human KIAA0680 and C, variant 2				PF02755	IPR004018 RPEL repeat	ENOG503BJYS	S:(S) Function unknown	GO_function: GO:0003779 - actin binding [Evidence IEA];GO_process: GO:0030036 - actin cytoskeleton organization [Evidence IEA]
FUN_001297	FUN_001297-T1	mRNA	scaffold_2	253237	253804	+		hypothetical protein
FUN_001298	FUN_001298-T1	mRNA	scaffold_2	253965	255138	+		hypothetical protein
FUN_001299	FUN_001299-T1	mRNA	scaffold_2	255593	256865	+		hypothetical protein
FUN_001300	FUN_001300-T1	mRNA	scaffold_2	258102	258514	+		hypothetical protein
FUN_001301	FUN_001301-T1	mRNA	scaffold_2	259171	273379	+		hypothetical protein				PF00595;PF13180;PF17820	IPR001478 PDZ domain;IPR036034 PDZ superfamily;IPR051230 Amyloid-beta A4 Precursor Protein-Binding	ENOG503BA3P	K:(K) Transcription	GO_component: GO:0005737 - cytoplasm [Evidence IEA];GO_component: GO:0005886 - plasma membrane [Evidence IEA];GO_function: GO:0005515 - protein binding [Evidence IEA]
FUN_001302	FUN_001302-T1	mRNA	scaffold_2	386148	388881	+		hypothetical protein
FUN_001303	FUN_001303-T1	mRNA	scaffold_2	415905	416578	+		hypothetical protein
FUN_001304	FUN_001304-T1	mRNA	scaffold_2	418008	420599	-	ENPP1_1	ectonucleotide pyrophosphatase phosphodiesterase					IPR044929 DNA/RNA non-specific endonuclease superfamily	ENOG503BC7K	S:(S) Function unknown
FUN_001305	FUN_001305-T1	mRNA	scaffold_2	425048	430248	-	ENPP1_2	ectonucleotide pyrophosphatase phosphodiesterase					IPR002591 Type I phosphodiesterase/nucleotide pyrophosphatase/phosphate transferase	ENOG503BC7K	S:(S) Function unknown
FUN_001306	FUN_001306-T1	mRNA	scaffold_2	435805	442001	-	ENPP3_1	negative regulation of mast cell proliferation				PF01663	IPR002591 Type I phosphodiesterase/nucleotide pyrophosphatase/phosphate transferase;IPR017850 Alkaline-phosphatase-like, core domain superfamily	ENOG503BC7K	S:(S) Function unknown
FUN_001307	FUN_001307-T1	mRNA	scaffold_2	442907	452595	-		hypothetical protein					IPR002591 Type I phosphodiesterase/nucleotide pyrophosphatase/phosphate transferase;IPR017850 Alkaline-phosphatase-like, core domain superfamily;IPR044929 DNA/RNA non-specific endonuclease superfamily	ENOG503BC7K	Z:(Z) Cytoskeleton
FUN_001308	FUN_001308-T1	mRNA	scaffold_2	454479	457074	+		hypothetical protein				PF00001;PF10324	IPR000276 G protein-coupled receptor, rhodopsin-like;IPR017452 GPCR, rhodopsin-like, 7TM;IPR019427 7TM GPCR, serpentine receptor class w (Srw);IPR052954 GPCR_Ligand_Interaction	ENOG503BKI0	T:(T) Signal transduction mechanisms	GO_component: GO:0016020 - membrane [Evidence IEA];GO_function: GO:0004930 - G protein-coupled receptor activity [Evidence IEA];GO_function: GO:0008528 - G protein-coupled peptide receptor activity [Evidence IEA];GO_process: GO:0007186 - G protein-coupled receptor signaling pathway [Evidence IEA]
FUN_001309	FUN_001309-T1	mRNA	scaffold_2	460306	473599	-	ENPP3_2	ectonucleotide pyrophosphatase phosphodiesterase					IPR002591 Type I phosphodiesterase/nucleotide pyrophosphatase/phosphate transferase;IPR017850 Alkaline-phosphatase-like, core domain superfamily;IPR020821 ENPP1-3/EXOG-like, endonuclease/phosphodiesterase domain;IPR044925 His-Me finger superfamily;IPR044929 DNA/RNA non-specific endonuclease superfamily	ENOG503BC7K	S:(S) Function unknown	GO_function: GO:0016787 - hydrolase activity [Evidence IEA];GO_function: GO:0046872 - metal ion binding [Evidence IEA];GO_function: GO:0003676 - nucleic acid binding [Evidence IEA]
FUN_001310	FUN_001310-T1	mRNA	scaffold_2	505832	507898	+		hypothetical protein
FUN_001311	FUN_001311-T1	mRNA	scaffold_2	509318	509780	+		hypothetical protein
FUN_001313	FUN_001313-T1	mRNA	scaffold_2	518457	522700	+	KDM4B_2	Lysine-specific demethylase 4B						ENOG503B95Z	K:(K) Transcription
FUN_001314	FUN_001314-T1	mRNA	scaffold_2	523450	529321	-		hypothetical protein
FUN_001317	FUN_001317-T1	mRNA	scaffold_2	560208	566539	-	RPL27A	60S ribosomal protein L27A				PF00828	IPR001196 Large ribosomal subunit protein uL15, conserved site;IPR021131 Large ribosomal subunit protein uL15/eL18;IPR036227 Large ribosomal subunit protein uL15/eL18 superfamily	ENOG503BHMY	J:(J) Translation, ribosomal structure and biogenesis	GO_component: GO:0005840 - ribosome [Evidence IEA];GO_component: GO:0022625 - cytosolic large ribosomal subunit [Evidence IEA];GO_function: GO:0003735 - structural constituent of ribosome [Evidence IEA];GO_process: GO:0006412 - translation [Evidence IEA]
FUN_001319	FUN_001319-T1	mRNA	scaffold_2	585410	589666	-		hypothetical protein
FUN_001320	FUN_001320-T1	mRNA	scaffold_2	591794	623236	+		hypothetical protein
FUN_001321	FUN_001321-T1	mRNA	scaffold_2	624852	673048	+	DENND2A_1	suppression of tumorigenicity 5				PF02141;PF03456	IPR001194 cDENN domain;IPR005112 dDENN domain;IPR005113 uDENN domain;IPR037516 Tripartite DENN domain;IPR043153 DENN domain, C-terminal lobe;IPR051942 DENN domain-containing protein 2	ENOG503BDB1	T:(T) Signal transduction mechanisms
FUN_001322	FUN_001322-T1	mRNA	scaffold_2	673278	673586	+		hypothetical protein
FUN_001323	FUN_001323-T1	mRNA	scaffold_2	694238	710587	-	PLEKHA5_1	Pleckstrin y domain-containing A member 5			1768at6447			ENOG503BNUZ
FUN_001324	FUN_001324-T1	mRNA	scaffold_2	710836	712032	+		hypothetical protein
FUN_001325	FUN_001325-T1	mRNA	scaffold_2	714615	827918	-	PLEKHA5_2	Pleckstrin y domain-containing A member 5				PF00169	IPR001849 Pleckstrin homology domain;IPR011993 PH-like domain superfamily	ENOG503BNUZ
FUN_001328	FUN_001328-T1	mRNA	scaffold_2	904109	928340	+		hypothetical protein
FUN_001329	FUN_001329-T1	mRNA	scaffold_2	929359	957208	+		hypothetical protein
FUN_001331	FUN_001331-T1	mRNA	scaffold_2	1046913	1047875	+	FUT1_1	Belongs to the glycosyltransferase 11		2.4.1.69		PF01531	IPR002516 Glycosyl transferase, family 11	ENOG503BKDB	G:(G) Carbohydrate transport and metabolism	GO_component: GO:0016020 - membrane [Evidence IEA];GO_function: GO:0008107 - galactoside 2-alpha-L-fucosyltransferase activity [Evidence IEA];GO_process: GO:0005975 - carbohydrate metabolic process [Evidence IEA];GO_process: GO:0036065 - fucosylation [Evidence IEA];GO_process: GO:0006486 - protein glycosylation [Evidence IEA]				GT11
FUN_001333	FUN_001333-T1	mRNA	scaffold_2	1092301	1097959	+		hypothetical protein			11760at6447
FUN_001335	FUN_001335-T1	mRNA	scaffold_2	1131506	1147983	-	YIPF3	Protein yipf3			7963at6447		IPR051521 tRNA Modification and Golgi Maintenance Protein	ENOG503BF6Q	S:(S) Function unknown	GO_component: GO:0005794 - Golgi apparatus [Evidence IEA]
FUN_001336	FUN_001336-T1	mRNA	scaffold_2	1159551	1190208	+	RFWD3_1	RING finger and WD repeat domain-containing protein 3		2.3.2.27		PF00097;PF13445;PF13639;PF23419	IPR001680 WD40 repeat;IPR001841 Zinc finger, RING-type;IPR013083 Zinc finger, RING/FYVE/PHD-type;IPR015943 WD40/YVTN repeat-like-containing domain superfamily;IPR036322 WD40-repeat-containing domain superfamily;IPR037381 E3 ubiquitin-protein ligase RFWD3;IPR056527 E3 ubiquitin-protein ligase RFWD3-like, WD40 domain	ENOG503BE0K	O:(O) Posttranslational modification, protein turnover, chaperones	GO_component: GO:0005634 - nucleus [Evidence IEA];GO_function: GO:0005515 - protein binding [Evidence IEA];GO_function: GO:0004842 - ubiquitin-protein transferase activity [Evidence IEA];GO_process: GO:0016567 - protein ubiquitination [Evidence IEA];GO_process: GO:0036297 - interstrand cross-link repair [Evidence IEA]
FUN_001337	FUN_001337-T1	mRNA	scaffold_2	1202251	1226422	-		hypothetical protein				PF01303	IPR001379 Egg lysin (Sperm-lysin);IPR035916 Egg-lysin superfamily			GO_process: GO:0007338 - single fertilization [Evidence IEA]
FUN_001339	FUN_001339-T1	mRNA	scaffold_2	1249934	1251024	+		hypothetical protein
FUN_001341	FUN_001341-T1	mRNA	scaffold_2	1273556	1275802	-	GADD45G_1	Growth arrest and DNA damage-inducible protein GADD45 gamma				PF01248	IPR004038 Ribosomal protein eL8/eL30/eS12/Gadd45;IPR024824 Growth arrest and DNA damage-inducible protein GADD45;IPR029064 Ribosomal protein eL30-like superfamily	ENOG503BPIS	T:(T) Signal transduction mechanisms	GO_component: GO:0005737 - cytoplasm [Evidence IEA];GO_component: GO:0005634 - nucleus [Evidence IEA];GO_process: GO:0051726 - regulation of cell cycle [Evidence IEA]
FUN_001344	FUN_001344-T1	mRNA	scaffold_2	1299627	1305454	-	GADD45G_2	Growth arrest and DNA damage-inducible protein GADD45 gamma				PF01248	IPR004038 Ribosomal protein eL8/eL30/eS12/Gadd45;IPR024824 Growth arrest and DNA damage-inducible protein GADD45;IPR029064 Ribosomal protein eL30-like superfamily	ENOG503BPIS	S:(S) Function unknown	GO_component: GO:0005737 - cytoplasm [Evidence IEA];GO_component: GO:0005634 - nucleus [Evidence IEA];GO_process: GO:0051726 - regulation of cell cycle [Evidence IEA]
FUN_001345	FUN_001345-T1	mRNA	scaffold_2	1314306	1317021	-	RPS20_1	40S ribosomal protein S20			9354at6447	PF00338	IPR001848 Small ribosomal subunit protein uS10;IPR005729 Small ribosomal subunit protein uS10, eukaryotic/archaeal;IPR027486 Small ribosomal subunit protein uS10 domain;IPR036838 Small ribosomal subunit protein uS10 domain superfamily	ENOG503BQ9M	J:(J) Translation, ribosomal structure and biogenesis	GO_component: GO:0015935 - small ribosomal subunit [Evidence IEA];GO_component: GO:0005840 - ribosome [Evidence IEA];GO_function: GO:0003735 - structural constituent of ribosome [Evidence IEA];GO_process: GO:0006412 - translation [Evidence IEA]
FUN_001346	FUN_001346-T1	mRNA	scaffold_2	1317563	1356011	+	TM9SF4	Transmembrane 9 super member 4				PF02990	IPR004240 Nonaspanin (TM9SF)	ENOG503BGY8	U:(U) Intracellular trafficking, secretion, and vesicular transport	GO_component: GO:0016020 - membrane [Evidence IEA];GO_process: GO:0072657 - protein localization to membrane [Evidence IEA]
FUN_001347	FUN_001347-T1	mRNA	scaffold_2	1362117	1369473	-	ELP3_1	Elongator subunit		2.3.1.48	1273at6447	PF04055;PF16199	IPR000182 GNAT domain;IPR006638 Elp3/MiaA/NifB-like, radical SAM core domain;IPR007197 Radical SAM;IPR016181 Acyl-CoA N-acyltransferase;IPR032432 Radical SAM, C-terminal extension;IPR034687 Elongator complex protein 3-like;IPR039661 ELP3/YhcC	ENOG503BDGU	H:(H) Coenzyme transport and metabolism	GO_component: GO:0033588 - elongator holoenzyme complex [Evidence IEA];GO_component: GO:0005737 - cytoplasm [Evidence IEA];GO_component: GO:0005634 - nucleus [Evidence IEA];GO_function: GO:0051536 - iron-sulfur cluster binding [Evidence IEA];GO_function: GO:0003824 - catalytic activity [Evidence IEA];GO_function: GO:0016747 - acyltransferase activity, transferring groups other than amino-acyl gro…
FUN_001348	FUN_001348-T1	mRNA	scaffold_2	1371091	1384584	-	ELP3_2	Elongator subunit		2.3.1.48		PF23613	IPR039661 ELP3/YhcC;IPR056591 ELP3-like, N-terminal domain	ENOG503BDGU	H:(H) Coenzyme transport and metabolism	GO_component: GO:0033588 - elongator holoenzyme complex [Evidence IEA];GO_component: GO:0005737 - cytoplasm [Evidence IEA];GO_component: GO:0005634 - nucleus [Evidence IEA];GO_process: GO:0002926 - tRNA wobble base 5-methoxycarbonylmethyl-2-thiouridinylation [Evidence IEA]
FUN_001348	FUN_001348-T2	mRNA	scaffold_2	1371091	1384584	-	ELP3_2	Elongator subunit, variant 2		2.3.1.48		PF23613	IPR039661 ELP3/YhcC;IPR056591 ELP3-like, N-terminal domain	ENOG503BDGU	H:(H) Coenzyme transport and metabolism	GO_component: GO:0033588 - elongator holoenzyme complex [Evidence IEA];GO_component: GO:0005737 - cytoplasm [Evidence IEA];GO_component: GO:0005634 - nucleus [Evidence IEA];GO_process: GO:0002926 - tRNA wobble base 5-methoxycarbonylmethyl-2-thiouridinylation [Evidence IEA]
FUN_001351	FUN_001351-T1	mRNA	scaffold_2	1402080	1404685	-		hypothetical protein
FUN_001352	FUN_001352-T1	mRNA	scaffold_2	1404720	1414433	-		hypothetical protein				PF00235	IPR036140 Profilin superfamily;IPR048278 Profilin			GO_function: GO:0003779 - actin binding [Evidence IEA]
FUN_001354	FUN_001354-T1	mRNA	scaffold_2	1433094	1451674	+	P4HTM_4	L-ascorbic acid binding				PF13640	IPR005123 Oxoglutarate/iron-dependent dioxygenase domain;IPR006620 Prolyl 4-hydroxylase, alpha subunit;IPR011992 EF-hand domain pair;IPR018247 EF-Hand 1, calcium-binding site;IPR044862 Prolyl 4-hydroxylase alpha subunit, Fe(2+) 2OG dioxygenase domain;IPR045054 Prolyl 4-hydroxylase	ENOG503BE11	E:(E) Amino acid transport and metabolism	GO_component: GO:0005783 - endoplasmic reticulum [Evidence IEA];GO_function: GO:0004656 - procollagen-proline 4-dioxygenase activity [Evidence IEA];GO_function: GO:0016705 - oxidoreductase activity, acting on paired donors, with incorporation or reduction of molecular oxygen [Evidence IEA];GO_function: GO:0031418 - L-ascorbic acid binding [Evidence IEA];GO_function: GO:0005506 - iron ion binding …
FUN_001356	FUN_001356-T1	mRNA	scaffold_2	1457895	1468323	-	OGFOD1_1	Prolyl 3-hydroxylase ogfod1				PF10637;PF13640;PF13661	IPR019601 Oxoglutarate/iron-dependent oxygenase, C-terminal degradation domain;IPR039558 Prolyl 3,4-dihydroxylase TPA1/OFD1, N-terminal domain;IPR051842 Ribosomal subunit uS12 prolyl hydroxylase	ENOG503BA3J	B:(B) Chromatin structure and dynamics	GO_component: GO:0005737 - cytoplasm [Evidence IEA];GO_function: GO:0031543 - peptidyl-proline dioxygenase activity [Evidence IEA];GO_function: GO:0031418 - L-ascorbic acid binding [Evidence IEA];GO_function: GO:0016706 - 2-oxoglutarate-dependent dioxygenase activity [Evidence IEA];GO_function: GO:0005506 - iron ion binding [Evidence IEA];GO_process: GO:0006449 - regulation of translational termi…
FUN_001357	FUN_001357-T1	mRNA	scaffold_2	1476042	1479486	-	OGFOD1_2	Prolyl 3-hydroxylase ogfod1					IPR051842 Ribosomal subunit uS12 prolyl hydroxylase	ENOG503BA3J	B:(B) Chromatin structure and dynamics	GO_component: GO:0005737 - cytoplasm [Evidence IEA];GO_function: GO:0031543 - peptidyl-proline dioxygenase activity [Evidence IEA];GO_process: GO:0006449 - regulation of translational termination [Evidence IEA];GO_process: GO:0019511 - peptidyl-proline hydroxylation [Evidence IEA]
FUN_001360	FUN_001360-T1	mRNA	scaffold_2	1512278	1614292	+	TRABD2A	Metalloprotease TIKI1			4490at6447	PF01963	IPR002816 TraB/PrgY/GumN family;IPR040230 Protease TIKI1/2-like	ENOG503BG9E	S:(S) Function unknown	GO_component: GO:0016020 - membrane [Evidence IEA];GO_function: GO:0004222 - metalloendopeptidase activity [Evidence IEA];GO_function: GO:0004175 - endopeptidase activity [Evidence IEA];GO_process: GO:0030178 - negative regulation of Wnt signaling pathway [Evidence IEA]			G04
FUN_001361	FUN_001361-T1	mRNA	scaffold_2	1614259	1621456	+		hypothetical protein
FUN_001363	FUN_001363-T1	mRNA	scaffold_2	1634971	1637127	-	INO80_1	Putative DNA helicase ino80		3.6.4.12				ENOG503BYWJ	L:(L) Replication, recombination and repair
FUN_001364	FUN_001364-T1	mRNA	scaffold_2	1646196	1734660	-		hypothetical protein				PF00822	IPR004031 PMP-22/EMP/MP20/Claudin;IPR015664 P53-induced protein	ENOG503BEMI	S:(S) Function unknown	GO_component: GO:0005911 - cell-cell junction [Evidence IEA];GO_component: GO:0016020 - membrane [Evidence IEA];GO_process: GO:0098609 - cell-cell adhesion [Evidence IEA]
FUN_001367	FUN_001367-T1	mRNA	scaffold_2	1838986	1841621	-	GADD45G_3	Growth arrest and DNA damage-inducible protein GADD45 gamma				PF01248	IPR004038 Ribosomal protein eL8/eL30/eS12/Gadd45;IPR024824 Growth arrest and DNA damage-inducible protein GADD45;IPR029064 Ribosomal protein eL30-like superfamily	ENOG503BPIS	T:(T) Signal transduction mechanisms	GO_component: GO:0005737 - cytoplasm [Evidence IEA];GO_component: GO:0005634 - nucleus [Evidence IEA];GO_process: GO:0051726 - regulation of cell cycle [Evidence IEA]
FUN_001374	FUN_001374-T1	mRNA	scaffold_2	1878463	1885217	-	RPS20_2	40S ribosomal protein S20				PF00338	IPR001848 Small ribosomal subunit protein uS10;IPR005729 Small ribosomal subunit protein uS10, eukaryotic/archaeal;IPR027486 Small ribosomal subunit protein uS10 domain;IPR036838 Small ribosomal subunit protein uS10 domain superfamily	ENOG503BQ9M	J:(J) Translation, ribosomal structure and biogenesis	GO_component: GO:0015935 - small ribosomal subunit [Evidence IEA];GO_component: GO:0005840 - ribosome [Evidence IEA];GO_function: GO:0003735 - structural constituent of ribosome [Evidence IEA];GO_process: GO:0006412 - translation [Evidence IEA]
FUN_001381	FUN_001381-T1	mRNA	scaffold_2	1957738	1997991	-	OGFOD1_3	Prolyl 3-hydroxylase ogfod1				PF10637;PF13640;PF13661	IPR006342 Methyltransferase FkbM;IPR006620 Prolyl 4-hydroxylase, alpha subunit;IPR019601 Oxoglutarate/iron-dependent oxygenase, C-terminal degradation domain;IPR029063 S-adenosyl-L-methionine-dependent methyltransferase superfamily;IPR039558 Prolyl 3,4-dihydroxylase TPA1/OFD1, N-terminal domain;IPR051842 Ribosomal subunit uS12 prolyl hydroxylase	ENOG503BA3J	B:(B) Chromatin structure and dynamics	GO_component: GO:0005737 - cytoplasm [Evidence IEA];GO_function: GO:0016705 - oxidoreductase activity, acting on paired donors, with incorporation or reduction of molecular oxygen [Evidence IEA];GO_function: GO:0031418 - L-ascorbic acid binding [Evidence IEA];GO_function: GO:0016706 - 2-oxoglutarate-dependent dioxygenase activity [Evidence IEA];GO_function: GO:0031543 - peptidyl-proline dioxygena…
FUN_001382	FUN_001382-T1	mRNA	scaffold_2	2029174	2050910	-		hypothetical protein				PF21143;PF21144	IPR027417 P-loop containing nucleoside triphosphate hydrolase;IPR041677 DNA2/NAM7 helicase, helicase domain;IPR045055 DNA2/NAM7-like helicase;IPR047187 Upf1-like, C-terminal helicase domain;IPR048966 RNA helicase aquarius, beta-barrel;IPR048967 RNA helicase aquarius, insertion domain	ENOG503BADH	L:(L) Replication, recombination and repair	GO_component: GO:0071013 - catalytic step 2 spliceosome [Evidence IEA];GO_function: GO:0004386 - helicase activity [Evidence IEA];GO_function: GO:0003729 - mRNA binding [Evidence IEA]
FUN_001384	FUN_001384-T1	mRNA	scaffold_2	2052069	2094791	-		hypothetical protein					IPR032174 RNA helicase aquarius, N-terminal domain	ENOG503BADH	L:(L) Replication, recombination and repair
FUN_001385	FUN_001385-T1	mRNA	scaffold_2	2097805	2319871	+	ACSS2	Acetyl-coenzyme A synthetase, cytoplasmic		6.2.1.1	1182at6447	PF00501;PF13193;PF16177	IPR000873 AMP-dependent synthetase/ligase domain;IPR020845 AMP-binding, conserved site;IPR025110 AMP-binding enzyme, C-terminal domain;IPR032387 Acetyl-coenzyme A synthetase, N-terminal domain;IPR042099 ANL, N-terminal domain;IPR045851 AMP-binding enzyme, C-terminal domain superfamily	ENOG503BE2N	I:(I) Lipid transport and metabolism	GO_function: GO:0003987 - acetate-CoA ligase activity [Evidence IEA];GO_process: GO:0006085 - acetyl-CoA biosynthetic process [Evidence IEA]
FUN_001388	FUN_001388-T1	mRNA	scaffold_2	2131535	2340993	+		hypothetical protein					IPR026719 Glutamate-rich protein 1
FUN_001388	FUN_001388-T2	mRNA	scaffold_2	2131535	2340993	+		hypothetical protein					IPR026719 Glutamate-rich protein 1
FUN_094751	FUN_094751-T1	mRNA	scaffold_2	2190237	2212601	-		hypothetical protein				PF13087	IPR027417 P-loop containing nucleoside triphosphate hydrolase;IPR041679 DNA2/NAM7 helicase-like, C-terminal;IPR045055 DNA2/NAM7-like helicase;IPR047187 Upf1-like, C-terminal helicase domain	ENOG503BADH	L:(L) Replication, recombination and repair	GO_component: GO:0071013 - catalytic step 2 spliceosome [Evidence IEA];GO_function: GO:0003729 - mRNA binding [Evidence IEA]
FUN_001386	FUN_001386-T1	mRNA	scaffold_2	2323559	2332023	-		hypothetical protein				PF00651	IPR000210 BTB/POZ domain;IPR011333 SKP1/BTB/POZ domain superfamily	ENOG503BD4K	S:(S) Function unknown	GO_function: GO:0005515 - protein binding [Evidence IEA]
FUN_001387	FUN_001387-T1	mRNA	scaffold_2	2334497	2335480	-		hypothetical protein		2.7.11.1		PF00069;PF07714	IPR000719 Protein kinase domain;IPR008271 Serine/threonine-protein kinase, active site;IPR011009 Protein kinase-like domain superfamily;IPR017441 Protein kinase, ATP binding site;IPR051681 Serine/Threonine Kinases and Pseudokinases	ENOG503BD2X	T:(T) Signal transduction mechanisms	GO_function: GO:0004674 - protein serine/threonine kinase activity [Evidence IEA];GO_function: GO:0005524 - ATP binding [Evidence IEA];GO_function: GO:0004672 - protein kinase activity [Evidence IEA];GO_process: GO:0006468 - protein phosphorylation [Evidence IEA]
FUN_001389	FUN_001389-T1	mRNA	scaffold_2	2341537	2342338	+		hypothetical protein
FUN_001390	FUN_001390-T1	mRNA	scaffold_2	2342671	2349048	+		hypothetical protein				PF00067	IPR001128 Cytochrome P450;IPR036396 Cytochrome P450 superfamily	ENOG5038BSU	Q:(Q) Secondary metabolites biosynthesis, transport and catabolism	GO_function: GO:0004508 - steroid 17-alpha-monooxygenase activity [Evidence IEA];GO_function: GO:0016705 - oxidoreductase activity, acting on paired donors, with incorporation or reduction of molecular oxygen [Evidence IEA];GO_function: GO:0020037 - heme binding [Evidence IEA];GO_function: GO:0004497 - monooxygenase activity [Evidence IEA];GO_function: GO:0005506 - iron ion binding [Evidence IEA]…
FUN_001391	FUN_001391-T1	mRNA	scaffold_2	2351498	2352292	+		hypothetical protein					IPR001128 Cytochrome P450;IPR036396 Cytochrome P450 superfamily			GO_function: GO:0020037 - heme binding [Evidence IEA];GO_function: GO:0016705 - oxidoreductase activity, acting on paired donors, with incorporation or reduction of molecular oxygen [Evidence IEA];GO_function: GO:0005506 - iron ion binding [Evidence IEA];GO_function: GO:0004497 - monooxygenase activity [Evidence IEA]
FUN_001392	FUN_001392-T1	mRNA	scaffold_2	2353424	2356586	+		hypothetical protein					IPR001128 Cytochrome P450;IPR002401 Cytochrome P450, E-class, group I;IPR017972 Cytochrome P450, conserved site;IPR036396 Cytochrome P450 superfamily;IPR050182 Cytochrome P450 family 2	ENOG503BCD7	Q:(Q) Secondary metabolites biosynthesis, transport and catabolism	GO_component: GO:0005737 - cytoplasm [Evidence IEA];GO_component: GO:0043231 - intracellular membrane-bounded organelle [Evidence IEA];GO_function: GO:0016712 - oxidoreductase activity, acting on paired donors, with incorporation or reduction of molecular oxygen, reduced flavin or flavoprotein as one donor, and incorporation of one atom of oxygen [Evidence IEA];GO_function: GO:0016705 - oxidoredu…
FUN_001396	FUN_001396-T1	mRNA	scaffold_2	2411079	2422470	+		hypothetical protein		1.14.14.54		PF00067	IPR001128 Cytochrome P450;IPR002401 Cytochrome P450, E-class, group I;IPR017972 Cytochrome P450, conserved site;IPR036396 Cytochrome P450 superfamily;IPR050182 Cytochrome P450 family 2	ENOG503P0Q5	Q:(Q) Secondary metabolites biosynthesis, transport and catabolism	GO_function: GO:0020037 - heme binding [Evidence IEA];GO_function: GO:0016705 - oxidoreductase activity, acting on paired donors, with incorporation or reduction of molecular oxygen [Evidence IEA];GO_function: GO:0005506 - iron ion binding [Evidence IEA];GO_function: GO:0004497 - monooxygenase activity [Evidence IEA]
FUN_001397	FUN_001397-T1	mRNA	scaffold_2	2426057	2426443	+		hypothetical protein
FUN_001398	FUN_001398-T1	mRNA	scaffold_2	2433795	2451981	+		hypothetical protein				PF13383	IPR025714 Methyltransferase domain;IPR026913 Probable methyltransferase-like protein 24	ENOG503C175	S:(S) Function unknown
FUN_001400	FUN_001400-T1	mRNA	scaffold_2	2492893	2611067	+		hypothetical protein					IPR025714 Methyltransferase domain;IPR026913 Probable methyltransferase-like protein 24	ENOG503BHNK	S:(S) Function unknown
FUN_001401	FUN_001401-T1	mRNA	scaffold_2	2636748	2865710	-		hypothetical protein				PF05050;PF13383	IPR025714 Methyltransferase domain;IPR026913 Probable methyltransferase-like protein 24	ENOG503BHNK	S:(S) Function unknown
FUN_001401	FUN_001401-T2	mRNA	scaffold_2	2636748	2865710	-		hypothetical protein				PF05050;PF13383	IPR025714 Methyltransferase domain;IPR026913 Probable methyltransferase-like protein 24	ENOG503BHNK	S:(S) Function unknown
FUN_001403	FUN_001403-T1	mRNA	scaffold_2	2928272	2929707	+		hypothetical protein
FUN_094752	FUN_094752-T1	mRNA	scaffold_2	2947632	3264475	+		hypothetical protein			11093at6447		IPR029034 Cystine-knot cytokine;IPR052876 Insect Developmental Hormone Regulators	ENOG503BUR4
FUN_094752	FUN_094752-T2	mRNA	scaffold_2	2947632	3264475	+		hypothetical protein			11093at6447		IPR029034 Cystine-knot cytokine;IPR052876 Insect Developmental Hormone Regulators	ENOG503BUR4
FUN_001404	FUN_001404-T1	mRNA	scaffold_2	2967935	2969554	+	NFIL3_1	Nfil3p				PF00170;PF07716	IPR004827 Basic-leucine zipper domain;IPR046347 Basic-leucine zipper domain superfamily;IPR047106 Nuclear factor interleukin-3-regulated protein-like , bZIP domain;IPR047229 Nuclear factor interleukin-3-regulated protein-like	ENOG503BNNK	K:(K) Transcription	GO_component: GO:0005634 - nucleus [Evidence IEA];GO_function: GO:0003677 - DNA binding [Evidence IEA];GO_function: GO:0003700 - DNA-binding transcription factor activity [Evidence IEA];GO_process: GO:0007623 - circadian rhythm [Evidence IEA];GO_process: GO:0006355 - regulation of DNA-templated transcription [Evidence IEA]
FUN_001411	FUN_001411-T1	mRNA	scaffold_2	3150852	3154633	+		hypothetical protein
FUN_001412	FUN_001412-T1	mRNA	scaffold_2	3155722	3155884	+		hypothetical protein
FUN_001428	FUN_001428-T1	mRNA	scaffold_2	3363031	3367889	+		hypothetical protein					IPR035940 CAP superfamily
FUN_001431	FUN_001431-T1	mRNA	scaffold_2	3415663	3420984	+	NFIL3_2	Nfil3p				PF00170;PF07716	IPR004827 Basic-leucine zipper domain;IPR046347 Basic-leucine zipper domain superfamily;IPR047106 Nuclear factor interleukin-3-regulated protein-like , bZIP domain;IPR047229 Nuclear factor interleukin-3-regulated protein-like	ENOG503BNNK	K:(K) Transcription	GO_component: GO:0005634 - nucleus [Evidence IEA];GO_function: GO:0003677 - DNA binding [Evidence IEA];GO_function: GO:0003700 - DNA-binding transcription factor activity [Evidence IEA];GO_process: GO:0007623 - circadian rhythm [Evidence IEA];GO_process: GO:0006355 - regulation of DNA-templated transcription [Evidence IEA]
FUN_001432	FUN_001432-T1	mRNA	scaffold_2	3425929	3426917	+		hypothetical protein
FUN_001433	FUN_001433-T1	mRNA	scaffold_2	3432437	3753523	+	PCBD2	Pterin-4-alpha-carbinolamine dehydratase 2		4.2.1.96	10162at6447	PF01329	IPR001533 Pterin 4 alpha carbinolamine dehydratase;IPR036428 Pterin 4 alpha carbinolamine dehydratase superfamily	ENOG503BSH6	K:(K) Transcription	GO_function: GO:0008124 - 4-alpha-hydroxytetrahydrobiopterin dehydratase activity [Evidence IEA];GO_process: GO:0006729 - tetrahydrobiopterin biosynthetic process [Evidence IEA]
FUN_001436	FUN_001436-T1	mRNA	scaffold_2	3764616	3774189	-		hypothetical protein		4.4.1.1		PF01053	IPR000277 Cys/Met metabolism, pyridoxal phosphate-dependent enzyme;IPR015421 Pyridoxal phosphate-dependent transferase, major domain;IPR015422 Pyridoxal phosphate-dependent transferase, small domain;IPR015424 Pyridoxal phosphate-dependent transferase;IPR054542 Cys/Met metabolism enzyme, pyridoxal-phosphate attachment site	ENOG503BFVK	E:(E) Amino acid transport and metabolism	GO_component: GO:0005737 - cytoplasm [Evidence IEA];GO_function: GO:0016846 - carbon-sulfur lyase activity [Evidence IEA];GO_function: GO:0004123 - cystathionine gamma-lyase activity [Evidence IEA];GO_function: GO:0030170 - pyridoxal phosphate binding [Evidence IEA];GO_process: GO:0019346 - transsulfuration [Evidence IEA];GO_process: GO:0019343 - cysteine biosynthetic process via cystathionine [E…
FUN_001437	FUN_001437-T1	mRNA	scaffold_2	3779780	3784408	-		hypothetical protein				PF00754;PF22633	IPR001304 C-type lectin-like;IPR006585 Fucolectin tachylectin-4 pentraxin-1;IPR008979 Galactose-binding-like domain superfamily;IPR016186 C-type lectin-like/link domain superfamily;IPR016187 C-type lectin fold;IPR051941 Blood Group Antigen-Binding Lectin	ENOG503BC84	S:(S) Function unknown					CBM47
FUN_001440	FUN_001440-T1	mRNA	scaffold_2	3807860	3811190	-		hypothetical protein
FUN_001442	FUN_001442-T1	mRNA	scaffold_2	3850875	3860880	+	GCN1L1_1	eIF-2-alpha kinase activator GCN1				PF23271;PF24984;PF24987	IPR011989 Armadillo-like helical;IPR016024 Armadillo-type fold;IPR021133 HEAT, type 2;IPR034085 TOG domain	ENOG503BA6J	J:(J) Translation, ribosomal structure and biogenesis	GO_component: GO:0005829 - cytosol [Evidence IEA];GO_function: GO:0019887 - protein kinase regulator activity [Evidence IEA];GO_process: GO:0034198 - cellular response to amino acid starvation [Evidence IEA];GO_process: GO:0006417 - regulation of translation [Evidence IEA]
FUN_001443	FUN_001443-T1	mRNA	scaffold_2	3861477	3886946	-	GCN1L1_2	eIF-2-alpha kinase activator GCN1				PF24987	IPR011989 Armadillo-like helical;IPR016024 Armadillo-type fold	ENOG503BA6J	J:(J) Translation, ribosomal structure and biogenesis	GO_component: GO:0005829 - cytosol [Evidence IEA];GO_function: GO:0019887 - protein kinase regulator activity [Evidence IEA];GO_process: GO:0034198 - cellular response to amino acid starvation [Evidence IEA];GO_process: GO:0006417 - regulation of translation [Evidence IEA]
FUN_001444	FUN_001444-T1	mRNA	scaffold_2	3983274	3984061	+		hypothetical protein
FUN_001445	FUN_001445-T1	mRNA	scaffold_2	4006345	4009723	+		hypothetical protein			10386at6447	PF10171	IPR019322 Mitochondrial import inner membrane translocase subunit Tim29	ENOG503BP8R	S:(S) Function unknown	GO_component: GO:0042721 - TIM22 mitochondrial import inner membrane insertion complex [Evidence IEA];GO_process: GO:0045039 - protein insertion into mitochondrial inner membrane [Evidence IEA]
FUN_001450	FUN_001450-T1	mRNA	scaffold_2	4040258	4041637	-	R3HDM4_1	nucleic acid binding				PF01424	IPR001374 R3H domain;IPR036867 R3H domain superfamily;IPR039629 R3H domain-containing protein 4	ENOG503BJBG	S:(S) Function unknown	GO_function: GO:0003676 - nucleic acid binding [Evidence IEA]
FUN_001451	FUN_001451-T1	mRNA	scaffold_2	4043600	4044849	+		hypothetical protein					IPR029069 HotDog domain superfamily	ENOG501S1Z8	I:(I) Lipid transport and metabolism
FUN_001454	FUN_001454-T1	mRNA	scaffold_2	4077665	4098882	+		hypothetical protein					IPR002539 MaoC-like dehydratase domain;IPR029069 HotDog domain superfamily	ENOG502WNJI	I:(I) Lipid transport and metabolism
FUN_001463	FUN_001463-T1	mRNA	scaffold_2	4267030	4275831	+		hypothetical protein
FUN_001466	FUN_001466-T1	mRNA	scaffold_2	4276385	4278241	+		hypothetical protein					IPR011029 Death-like domain superfamily
FUN_001471	FUN_001471-T1	mRNA	scaffold_2	4303141	4305139	-		hypothetical protein
FUN_001472	FUN_001472-T1	mRNA	scaffold_2	4338486	4347510	-		hypothetical protein				PF00001	IPR000276 G protein-coupled receptor, rhodopsin-like;IPR016186 C-type lectin-like/link domain superfamily;IPR016187 C-type lectin fold;IPR017452 GPCR, rhodopsin-like, 7TM	ENOG503BR7H	S:(S) Function unknown	GO_component: GO:0016020 - membrane [Evidence IEA];GO_component: GO:0005886 - plasma membrane [Evidence IEA];GO_function: GO:0004930 - G protein-coupled receptor activity [Evidence IEA];GO_process: GO:0007186 - G protein-coupled receptor signaling pathway [Evidence IEA]
FUN_001481	FUN_001481-T1	mRNA	scaffold_2	4523007	4543228	+	TOE1_1	Target of EGR1, member 1 (Nuclear)					IPR000571 Zinc finger, CCCH-type;IPR006941 Ribonuclease CAF1;IPR012337 Ribonuclease H-like superfamily;IPR036397 Ribonuclease H superfamily;IPR036855 Zinc finger, CCCH-type superfamily;IPR051181 CAF1 family poly(A)-specific ribonucleases	ENOG503BH5I	L:(L) Replication, recombination and repair	GO_component: GO:0015030 - Cajal body [Evidence IEA];GO_function: GO:0003676 - nucleic acid binding [Evidence IEA];GO_function: GO:0017069 - snRNA binding [Evidence IEA];GO_function: GO:0003723 - RNA binding [Evidence IEA];GO_function: GO:0000175 - 3'-5'-RNA exonuclease activity [Evidence IEA];GO_function: GO:0046872 - metal ion binding [Evidence IEA];GO_process: GO:0034472 - snRNA 3'-end process…
FUN_001483	FUN_001483-T1	mRNA	scaffold_2	4591628	4592169	+		hypothetical protein		2.6.1.27			IPR015422 Pyridoxal phosphate-dependent transferase, small domain;IPR015424 Pyridoxal phosphate-dependent transferase;IPR050859 Class-I pyridoxal-phosphate-dependent aminotransferase-like	ENOG503NU3Z	E:(E) Amino acid transport and metabolism	GO_function: GO:0008483 - transaminase activity [Evidence IEA];GO_process: GO:1901605 - alpha-amino acid metabolic process [Evidence IEA]
FUN_001484	FUN_001484-T1	mRNA	scaffold_2	4605928	4607024	+		hypothetical protein					IPR015422 Pyridoxal phosphate-dependent transferase, small domain;IPR015424 Pyridoxal phosphate-dependent transferase;IPR050859 Class-I pyridoxal-phosphate-dependent aminotransferase-like	ENOG50KOG0634	E:(E) Amino acid transport and metabolism;K:(K) Transcription	GO_function: GO:0008483 - transaminase activity [Evidence IEA];GO_process: GO:1901605 - alpha-amino acid metabolic process [Evidence IEA]
FUN_001485	FUN_001485-T1	mRNA	scaffold_2	4618423	4628895	+		hypothetical protein					IPR015421 Pyridoxal phosphate-dependent transferase, major domain;IPR015424 Pyridoxal phosphate-dependent transferase;IPR050859 Class-I pyridoxal-phosphate-dependent aminotransferase-like	ENOG503NU3Z	E:(E) Amino acid transport and metabolism	GO_function: GO:0008483 - transaminase activity [Evidence IEA];GO_process: GO:1901605 - alpha-amino acid metabolic process [Evidence IEA]
FUN_001486	FUN_001486-T1	mRNA	scaffold_2	4689288	4693787	+		hypothetical protein					IPR000175 Sodium:neurotransmitter symporter;IPR037272 Sodium:neurotransmitter symporter superfamily	ENOG503BBRV	T:(T) Signal transduction mechanisms	GO_component: GO:0016020 - membrane [Evidence IEA];GO_component: GO:0005886 - plasma membrane [Evidence IEA];GO_function: GO:0005283 - amino acid:sodium symporter activity [Evidence IEA];GO_process: GO:0089718 - amino acid import across plasma membrane [Evidence IEA];GO_process: GO:0071705 - nitrogen compound transport [Evidence IEA];GO_process: GO:0035725 - sodium ion transmembrane transport [Ev…
FUN_001487	FUN_001487-T1	mRNA	scaffold_2	4695230	4697165	+	SLC6A9_2	Sodium- and chloride-dependent glycine transporter 1					IPR000175 Sodium:neurotransmitter symporter;IPR037272 Sodium:neurotransmitter symporter superfamily	ENOG503BBRV	T:(T) Signal transduction mechanisms	GO_component: GO:0016020 - membrane [Evidence IEA];GO_component: GO:0005886 - plasma membrane [Evidence IEA];GO_function: GO:0005283 - amino acid:sodium symporter activity [Evidence IEA];GO_process: GO:0089718 - amino acid import across plasma membrane [Evidence IEA];GO_process: GO:0071705 - nitrogen compound transport [Evidence IEA];GO_process: GO:0035725 - sodium ion transmembrane transport [Ev…
FUN_001488	FUN_001488-T1	mRNA	scaffold_2	4698608	4707486	+	SLC6A9_3	Sodium- and chloride-dependent glycine transporter 1					IPR000175 Sodium:neurotransmitter symporter;IPR037272 Sodium:neurotransmitter symporter superfamily	ENOG503BBRV	T:(T) Signal transduction mechanisms	GO_component: GO:0016020 - membrane [Evidence IEA];GO_component: GO:0005886 - plasma membrane [Evidence IEA];GO_function: GO:0005283 - amino acid:sodium symporter activity [Evidence IEA];GO_process: GO:0089718 - amino acid import across plasma membrane [Evidence IEA];GO_process: GO:0071705 - nitrogen compound transport [Evidence IEA];GO_process: GO:0035725 - sodium ion transmembrane transport [Ev…
FUN_001489	FUN_001489-T1	mRNA	scaffold_2	4709770	4717436	+	SLC6A7_3	Belongs to the sodium neurotransmitter symporter (SNF) (TC 2.A.22)					IPR000175 Sodium:neurotransmitter symporter;IPR037272 Sodium:neurotransmitter symporter superfamily	ENOG503BBRV	T:(T) Signal transduction mechanisms	GO_component: GO:0016020 - membrane [Evidence IEA];GO_component: GO:0005886 - plasma membrane [Evidence IEA];GO_function: GO:0005283 - amino acid:sodium symporter activity [Evidence IEA];GO_process: GO:0089718 - amino acid import across plasma membrane [Evidence IEA];GO_process: GO:0071705 - nitrogen compound transport [Evidence IEA];GO_process: GO:0035725 - sodium ion transmembrane transport [Ev…
FUN_001491	FUN_001491-T1	mRNA	scaffold_2	4737660	4738562	-		hypothetical protein						ENOG503BCTJ	M:(M) Cell wall/membrane/envelope biogenesis
FUN_001492	FUN_001492-T1	mRNA	scaffold_2	4764270	4764917	-		hypothetical protein
FUN_001493	FUN_001493-T1	mRNA	scaffold_2	4881341	4882524	-		hypothetical protein		3.1.3.3				ENOG504NI98	K:(K) Transcription;T:(T) Signal transduction mechanisms
FUN_001495	FUN_001495-T1	mRNA	scaffold_2	5018231	5025855	+		hypothetical protein
FUN_001499	FUN_001499-T1	mRNA	scaffold_2	5074570	5078157	+	TOE1_2	Target of EGR1, member 1 (Nuclear)					IPR000571 Zinc finger, CCCH-type;IPR036397 Ribonuclease H superfamily;IPR036855 Zinc finger, CCCH-type superfamily;IPR051181 CAF1 family poly(A)-specific ribonucleases	ENOG503BH5I	L:(L) Replication, recombination and repair	GO_component: GO:0015030 - Cajal body [Evidence IEA];GO_function: GO:0003676 - nucleic acid binding [Evidence IEA];GO_function: GO:0017069 - snRNA binding [Evidence IEA];GO_function: GO:0003723 - RNA binding [Evidence IEA];GO_function: GO:0000175 - 3'-5'-RNA exonuclease activity [Evidence IEA];GO_function: GO:0046872 - metal ion binding [Evidence IEA];GO_process: GO:0034472 - snRNA 3'-end process…
FUN_001508	FUN_001508-T1	mRNA	scaffold_2	5221303	5224440	+	Glipr1l1_3	SCP / Tpx-1 / Ag5 / PR-1 / Sc7 of extracellular domains.				PF00188	IPR001283 Cysteine-rich secretory protein-related;IPR014044 CAP domain;IPR035940 CAP superfamily	ENOG503BK4U	S:(S) Function unknown
FUN_001509	FUN_001509-T1	mRNA	scaffold_2	5254997	5271458	+	CRISPLD2_1	Cysteine-rich secretory protein LCCL				PF00188;PF01549	IPR001283 Cysteine-rich secretory protein-related;IPR003582 ShKT domain;IPR014044 CAP domain;IPR035940 CAP superfamily	ENOG503B957	S:(S) Function unknown
FUN_001512	FUN_001512-T1	mRNA	scaffold_2	5285151	5285932	-		hypothetical protein
FUN_001513	FUN_001513-T1	mRNA	scaffold_2	5291464	5306295	+	CSE1L_1	Exportin-2				PF03810;PF08506	IPR001494 Importin-beta, N-terminal domain;IPR011989 Armadillo-like helical;IPR013713 Exportin-2, central domain;IPR016024 Armadillo-type fold	ENOG503BB1S	U:(U) Intracellular trafficking, secretion, and vesicular transport;Y:(Y) Nuclear structure	GO_component: GO:0005635 - nuclear envelope [Evidence IEA];GO_component: GO:0005829 - cytosol [Evidence IEA];GO_function: GO:0005049 - nuclear export signal receptor activity [Evidence IEA];GO_function: GO:0031267 - small GTPase binding [Evidence IEA];GO_process: GO:0006606 - protein import into nucleus [Evidence IEA];GO_process: GO:0006886 - intracellular protein transport [Evidence IEA];GO_proc…
FUN_001513	FUN_001513-T2	mRNA	scaffold_2	5291464	5306295	+	CSE1L_1	Exportin-2, variant 2				PF08506	IPR011989 Armadillo-like helical;IPR013713 Exportin-2, central domain;IPR016024 Armadillo-type fold	ENOG503BB1S	U:(U) Intracellular trafficking, secretion, and vesicular transport;Y:(Y) Nuclear structure	GO_component: GO:0005635 - nuclear envelope [Evidence IEA];GO_component: GO:0005829 - cytosol [Evidence IEA];GO_function: GO:0005049 - nuclear export signal receptor activity [Evidence IEA];GO_process: GO:0006606 - protein import into nucleus [Evidence IEA];GO_process: GO:0006886 - intracellular protein transport [Evidence IEA];GO_process: GO:0006611 - protein export from nucleus [Evidence IEA]
FUN_001515	FUN_001515-T1	mRNA	scaffold_2	5343705	5344570	+		hypothetical protein		2.6.1.27			IPR015422 Pyridoxal phosphate-dependent transferase, small domain;IPR015424 Pyridoxal phosphate-dependent transferase;IPR050859 Class-I pyridoxal-phosphate-dependent aminotransferase-like	ENOG503NU3Z	E:(E) Amino acid transport and metabolism	GO_function: GO:0008483 - transaminase activity [Evidence IEA];GO_process: GO:1901605 - alpha-amino acid metabolic process [Evidence IEA]
FUN_001517	FUN_001517-T1	mRNA	scaffold_2	5365780	5369467	+		hypothetical protein
FUN_001518	FUN_001518-T1	mRNA	scaffold_2	5371825	5372786	-		hypothetical protein					IPR004839 Aminotransferase, class I/classII, large domain;IPR015422 Pyridoxal phosphate-dependent transferase, small domain;IPR015424 Pyridoxal phosphate-dependent transferase;IPR050859 Class-I pyridoxal-phosphate-dependent aminotransferase-like	ENOG503BDH5	E:(E) Amino acid transport and metabolism	GO_function: GO:0030170 - pyridoxal phosphate binding [Evidence IEA];GO_function: GO:0008483 - transaminase activity [Evidence IEA];GO_process: GO:0009058 - biosynthetic process [Evidence IEA];GO_process: GO:1901605 - alpha-amino acid metabolic process [Evidence IEA]
FUN_001520	FUN_001520-T1	mRNA	scaffold_2	5378588	5380071	-		hypothetical protein					IPR004839 Aminotransferase, class I/classII, large domain;IPR015421 Pyridoxal phosphate-dependent transferase, major domain;IPR015424 Pyridoxal phosphate-dependent transferase;IPR050859 Class-I pyridoxal-phosphate-dependent aminotransferase-like	ENOG503BDH5	E:(E) Amino acid transport and metabolism	GO_function: GO:0030170 - pyridoxal phosphate binding [Evidence IEA];GO_function: GO:0008483 - transaminase activity [Evidence IEA];GO_process: GO:0009058 - biosynthetic process [Evidence IEA];GO_process: GO:1901605 - alpha-amino acid metabolic process [Evidence IEA]
FUN_001521	FUN_001521-T1	mRNA	scaffold_2	5410812	5424525	+		hypothetical protein				PF00155	IPR004839 Aminotransferase, class I/classII, large domain;IPR015421 Pyridoxal phosphate-dependent transferase, major domain;IPR015424 Pyridoxal phosphate-dependent transferase;IPR050859 Class-I pyridoxal-phosphate-dependent aminotransferase-like	ENOG503BDH5	E:(E) Amino acid transport and metabolism	GO_function: GO:0030170 - pyridoxal phosphate binding [Evidence IEA];GO_function: GO:0008483 - transaminase activity [Evidence IEA];GO_process: GO:0009058 - biosynthetic process [Evidence IEA];GO_process: GO:1901605 - alpha-amino acid metabolic process [Evidence IEA]
FUN_001522	FUN_001522-T1	mRNA	scaffold_2	5441341	5442106	+		hypothetical protein
FUN_001523	FUN_001523-T1	mRNA	scaffold_2	5442477	5443754	+		hypothetical protein
FUN_001524	FUN_001524-T1	mRNA	scaffold_2	5443838	5444212	+		hypothetical protein
FUN_001525	FUN_001525-T1	mRNA	scaffold_2	5444329	5444551	+		hypothetical protein
FUN_001526	FUN_001526-T1	mRNA	scaffold_2	5464884	5466263	-		hypothetical protein					IPR036201 Pacifastin domain superfamily			GO_function: GO:0030414 - peptidase inhibitor activity [Evidence IEA]
FUN_001530	FUN_001530-T1	mRNA	scaffold_2	5487821	5610048	-	SPATA1	Spermatoproteinsis-associated C-terminus				PF15743	IPR031478 Spermatogenesis-associated protein 1, C-terminal domain;IPR039062 Spermatogenesis-associated protein 1	ENOG503BE8K	S:(S) Function unknown
FUN_001533	FUN_001533-T1	mRNA	scaffold_2	5629416	5634456	+		hypothetical protein
FUN_001539	FUN_001539-T1	mRNA	scaffold_2	5655571	5656039	+		hypothetical protein
FUN_001542	FUN_001542-T1	mRNA	scaffold_2	5670258	5670583	+		hypothetical protein
FUN_001543	FUN_001543-T1	mRNA	scaffold_2	5673334	5674563	-		hypothetical protein				PF02317	IPR003421 Opine dehydrogenase;IPR008927 6-phosphogluconate dehydrogenase-like, C-terminal domain superfamily;IPR013328 6-phosphogluconate dehydrogenase, domain 2;IPR036291 NAD(P)-binding domain superfamily;IPR051729 Opine/Lysopine Dehydrogenase	ENOG503BYG1	S:(S) Function unknown	GO_function: GO:0016491 - oxidoreductase activity [Evidence IEA]
FUN_001544	FUN_001544-T1	mRNA	scaffold_2	5706380	5710051	+		hypothetical protein
FUN_001545	FUN_001545-T1	mRNA	scaffold_2	5719473	5724826	+		hypothetical protein
FUN_001548	FUN_001548-T1	mRNA	scaffold_2	5743163	5749633	+		hypothetical protein
FUN_001550	FUN_001550-T1	mRNA	scaffold_2	5789475	5810242	+	PI15_1	Peptidase inhibitor 15				PF00188	IPR001283 Cysteine-rich secretory protein-related;IPR014044 CAP domain;IPR035940 CAP superfamily	ENOG503BHZ2	S:(S) Function unknown
FUN_001551	FUN_001551-T1	mRNA	scaffold_2	5810333	5817552	+	Glipr1l1_4	SCP / Tpx-1 / Ag5 / PR-1 / Sc7 of extracellular domains.				PF00188	IPR001283 Cysteine-rich secretory protein-related;IPR014044 CAP domain;IPR035940 CAP superfamily	ENOG503BK4U	S:(S) Function unknown
FUN_001552	FUN_001552-T1	mRNA	scaffold_2	5842152	5866967	+	CRISPLD2_2	Cysteine-rich secretory protein LCCL				PF00188;PF01549	IPR001283 Cysteine-rich secretory protein-related;IPR003582 ShKT domain;IPR014044 CAP domain;IPR035940 CAP superfamily	ENOG503B957	S:(S) Function unknown
FUN_001553	FUN_001553-T1	mRNA	scaffold_2	5870317	5871550	+		hypothetical protein						ENOG502SBTJ
FUN_094753	FUN_094753-T1	mRNA	scaffold_2	5873584	5882688	-		hypothetical protein				PF12012	IPR021893 Domain of unknown function DUF3504;IPR042838 Uncharacterized protein KIAA1958	ENOG503BQVG	S:(S) Function unknown
FUN_094753	FUN_094753-T2	mRNA	scaffold_2	5873584	5882688	-		hypothetical protein				PF12012	IPR021893 Domain of unknown function DUF3504;IPR042838 Uncharacterized protein KIAA1958	ENOG503BQVG	S:(S) Function unknown
FUN_001554	FUN_001554-T1	mRNA	scaffold_2	5886793	5887842	-		hypothetical protein
FUN_001555	FUN_001555-T1	mRNA	scaffold_2	5892036	5926088	+	CSE1L_3	Exportin-2			504at6447	PF03378;PF03810;PF08506	IPR001494 Importin-beta, N-terminal domain;IPR005043 Exportin-2, C-terminal;IPR011989 Armadillo-like helical;IPR013713 Exportin-2, central domain;IPR016024 Armadillo-type fold	ENOG503BB1S	U:(U) Intracellular trafficking, secretion, and vesicular transport;Y:(Y) Nuclear structure	GO_component: GO:0005635 - nuclear envelope [Evidence IEA];GO_component: GO:0005829 - cytosol [Evidence IEA];GO_function: GO:0005515 - protein binding [Evidence IEA];GO_function: GO:0005049 - nuclear export signal receptor activity [Evidence IEA];GO_function: GO:0031267 - small GTPase binding [Evidence IEA];GO_process: GO:0006606 - protein import into nucleus [Evidence IEA];GO_process: GO:0006886…
FUN_001569	FUN_001569-T1	mRNA	scaffold_2	6196794	6199316	-		hypothetical protein
FUN_001576	FUN_001576-T1	mRNA	scaffold_2	6336678	6342363	-		hypothetical protein
FUN_001581	FUN_001581-T1	mRNA	scaffold_2	6400067	6400557	-		hypothetical protein						ENOG503BCBZ	Q:(Q) Secondary metabolites biosynthesis, transport and catabolism
FUN_001583	FUN_001583-T1	mRNA	scaffold_2	6543484	6550788	+	SPSB3	SPRY domain-containing SOCS box protein 3			5572at6447	PF00622	IPR001496 SOCS box domain;IPR001870 B30.2/SPRY domain;IPR003877 SPRY domain;IPR013320 Concanavalin A-like lectin/glucanase domain superfamily;IPR035754 SPRY domain-containing SOCS box protein 3, SPRY domain;IPR043136 B30.2/SPRY domain superfamily;IPR050672 F-box/SPRY and SOCS box protein families	ENOG503B9JV	S:(S) Function unknown	GO_component: GO:0019005 - SCF ubiquitin ligase complex [Evidence IEA];GO_function: GO:0005515 - protein binding [Evidence IEA];GO_process: GO:0043161 - proteasome-mediated ubiquitin-dependent protein catabolic process [Evidence IEA]
FUN_001584	FUN_001584-T1	mRNA	scaffold_2	6681959	6683026	+	BTBD17_1	BTB/POZ domain-containing protein 17				PF00651;PF07707	IPR000210 BTB/POZ domain;IPR011333 SKP1/BTB/POZ domain superfamily;IPR011705 BTB/Kelch-associated;IPR051481 BTB/POZ domain-containing protein and Galectin-3-binding	ENOG503BD4K	S:(S) Function unknown	GO_function: GO:0005515 - protein binding [Evidence IEA]
FUN_001585	FUN_001585-T1	mRNA	scaffold_2	6714960	6715779	+		hypothetical protein
FUN_001586	FUN_001586-T1	mRNA	scaffold_2	6719431	6729681	-		hypothetical protein		5.3.1.9			IPR001672 Phosphoglucose isomerase (PGI);IPR046348 SIS domain superfamily	ENOG503B93W	G:(G) Carbohydrate transport and metabolism	GO_component: GO:0005829 - cytosol [Evidence IEA];GO_function: GO:0048029 - monosaccharide binding [Evidence IEA];GO_function: GO:0097367 - carbohydrate derivative binding [Evidence IEA];GO_function: GO:0004347 - glucose-6-phosphate isomerase activity [Evidence IEA];GO_process: GO:0006094 - gluconeogenesis [Evidence IEA];GO_process: GO:0051156 - glucose 6-phosphate metabolic process [Evidence IEA…
FUN_001587	FUN_001587-T1	mRNA	scaffold_2	6745365	6769602	-		hypothetical protein						ENOG503BISB
FUN_001588	FUN_001588-T1	mRNA	scaffold_2	6770283	6783086	-		hypothetical protein						ENOG503BISB
FUN_001589	FUN_001589-T1	mRNA	scaffold_2	6790396	6792975	-		hypothetical protein				PF00022	IPR004000 Actin family;IPR004001 Actin, conserved site;IPR020902 Actin/actin-like conserved site;IPR043129 ATPase, nucleotide binding domain	ENOG503BBGP	Z:(Z) Cytoskeleton
FUN_001591	FUN_001591-T1	mRNA	scaffold_2	6802907	6810393	+	RPS2_1	40S ribosomal protein			5640at6447	PF00333;PF03719	IPR000851 Small ribosomal subunit protein uS5;IPR005324 Small ribosomal subunit protein uS5, C-terminal;IPR005711 Small ribosomal subunit protein uS5, eukaryotic/archaeal;IPR013810 Small ribosomal subunit protein uS5, N-terminal;IPR014721 Small ribosomal subunit protein uS5 domain 2-type fold, subgroup;IPR018192 Small ribosomal subunit protein uS5, N-terminal, conserved site;IPR020568 Ribosomal p…	ENOG503BB55	J:(J) Translation, ribosomal structure and biogenesis	GO_component: GO:0015935 - small ribosomal subunit [Evidence IEA];GO_component: GO:0005840 - ribosome [Evidence IEA];GO_component: GO:0022627 - cytosolic small ribosomal subunit [Evidence IEA];GO_function: GO:0003723 - RNA binding [Evidence IEA];GO_function: GO:0003735 - structural constituent of ribosome [Evidence IEA];GO_process: GO:0006412 - translation [Evidence IEA]
FUN_001592	FUN_001592-T1	mRNA	scaffold_2	6815302	6822138	+		hypothetical protein						ENOG503BZU4
FUN_001593	FUN_001593-T1	mRNA	scaffold_2	6862425	6867620	-	NUBP2	Nucleotide-binding protein 2					IPR019591 Mrp/NBP35 ATP-binding protein;IPR027417 P-loop containing nucleoside triphosphate hydrolase;IPR033756 Flagellum site-determining protein YlxH/ Fe-S cluster assembling factor NBP35	ENOG503BD73	D:(D) Cell cycle control, cell division, chromosome partitioning	GO_component: GO:0005829 - cytosol [Evidence IEA];GO_function: GO:0051536 - iron-sulfur cluster binding [Evidence IEA];GO_function: GO:0005524 - ATP binding [Evidence IEA];GO_function: GO:0140663 - ATP-dependent FeS chaperone activity [Evidence IEA];GO_process: GO:0016226 - iron-sulfur cluster assembly [Evidence IEA]
FUN_001594	FUN_001594-T1	mRNA	scaffold_2	6868659	6873931	+		hypothetical protein					IPR026622 Matrix-remodeling-associated protein 7	ENOG503BVTE
FUN_001595	FUN_001595-T1	mRNA	scaffold_2	6878230	6895245	-	EME1	crossover junction endonuclease eme1			10237at6447	PF21292	IPR033310 Mms4/EME1/EME2;IPR042530 EME1/EME2, C-terminal domain;IPR043087 EME1, nuclease domain, subdomain 2	ENOG503BEJ0	L:(L) Replication, recombination and repair	GO_component: GO:0048476 - Holliday junction resolvase complex [Evidence IEA];GO_component: GO:0005634 - nucleus [Evidence IEA];GO_function: GO:0008821 - crossover junction DNA endonuclease activity [Evidence IEA];GO_process: GO:0031573 - mitotic intra-S DNA damage checkpoint signaling [Evidence IEA];GO_process: GO:0000712 - resolution of meiotic recombination intermediates [Evidence IEA];GO_proc…
FUN_001595	FUN_001595-T2	mRNA	scaffold_2	6878230	6895245	-	EME1	crossover junction endonuclease eme1, variant 2					IPR033310 Mms4/EME1/EME2;IPR043087 EME1, nuclease domain, subdomain 2	ENOG503BEJ0	L:(L) Replication, recombination and repair	GO_component: GO:0048476 - Holliday junction resolvase complex [Evidence IEA];GO_component: GO:0005634 - nucleus [Evidence IEA];GO_function: GO:0008821 - crossover junction DNA endonuclease activity [Evidence IEA];GO_process: GO:0031573 - mitotic intra-S DNA damage checkpoint signaling [Evidence IEA];GO_process: GO:0000712 - resolution of meiotic recombination intermediates [Evidence IEA];GO_proc…
FUN_001596	FUN_001596-T1	mRNA	scaffold_2	6895734	6897267	+	MRPL27	60S ribosomal protein L27, mitochondrial			10917at6447	PF01016	IPR001684 Large ribosomal subunit protein bL27	ENOG503BQQX	J:(J) Translation, ribosomal structure and biogenesis	GO_component: GO:0005840 - ribosome [Evidence IEA];GO_component: GO:0005762 - mitochondrial large ribosomal subunit [Evidence IEA];GO_function: GO:0003735 - structural constituent of ribosome [Evidence IEA];GO_process: GO:0006412 - translation [Evidence IEA]
FUN_001597	FUN_001597-T1	mRNA	scaffold_2	6900194	6902223	-		hypothetical protein
FUN_001598	FUN_001598-T1	mRNA	scaffold_2	6908634	6969884	+	GNA13_1	Guanine nucleotide-binding protein subunit alpha-13			4453at6447	PF00025;PF00503	IPR001019 Guanine nucleotide binding protein (G-protein), alpha subunit;IPR011025 G protein alpha subunit, helical insertion;IPR027417 P-loop containing nucleoside triphosphate hydrolase	ENOG503BKEQ	D:(D) Cell cycle control, cell division, chromosome partitioning;T:(T) Signal transduction mechanisms	GO_component: GO:0005834 - heterotrimeric G-protein complex [Evidence IEA];GO_component: GO:0005737 - cytoplasm [Evidence IEA];GO_function: GO:0019001 - guanyl nucleotide binding [Evidence IEA];GO_function: GO:0003924 - GTPase activity [Evidence IEA];GO_function: GO:0031683 - G-protein beta/gamma-subunit complex binding [Evidence IEA];GO_function: GO:0001664 - G protein-coupled receptor binding […
FUN_001601	FUN_001601-T1	mRNA	scaffold_2	6999755	7015309	-	SYNGR1	Synaptogyrin-1			7622at6447	PF01284	IPR008253 Marvel domain;IPR016579 Synaptogyrin	ENOG503BCRB	T:(T) Signal transduction mechanisms;U:(U) Intracellular trafficking, secretion, and vesicular transport	GO_component: GO:0016020 - membrane [Evidence IEA];GO_component: GO:0030672 - synaptic vesicle membrane [Evidence IEA];GO_component: GO:0031594 - neuromuscular junction [Evidence IEA]
FUN_001602	FUN_001602-T1	mRNA	scaffold_2	7015501	7023681	+		hypothetical protein		2.3.2.27	3942at6447	PF23202;PF23208;PF23230	IPR001841 Zinc finger, RING-type;IPR013087 Zinc finger C2H2-type;IPR041888 ZN598/Hel2, RING finger;IPR044288 E3 ubiquitin-protein ligase ZNF598/Hel2;IPR056437 E3 ubiquitin-protein ligase ZNF598/Hel2, C2H2 zinc finger	ENOG503BBP3	O:(O) Posttranslational modification, protein turnover, chaperones	GO_function: GO:0061630 - ubiquitin protein ligase activity [Evidence IEA];GO_function: GO:0043022 - ribosome binding [Evidence IEA];GO_process: GO:0016567 - protein ubiquitination [Evidence IEA];GO_process: GO:0072344 - rescue of stalled ribosome [Evidence IEA]
FUN_001603	FUN_001603-T1	mRNA	scaffold_2	7040202	7113424	-	SSTR5_1	Somatostatin receptor type 5				PF00001	IPR000276 G protein-coupled receptor, rhodopsin-like;IPR017452 GPCR, rhodopsin-like, 7TM	ENOG503BCR0	T:(T) Signal transduction mechanisms	GO_component: GO:0016020 - membrane [Evidence IEA];GO_function: GO:0004930 - G protein-coupled receptor activity [Evidence IEA];GO_process: GO:0007186 - G protein-coupled receptor signaling pathway [Evidence IEA]
FUN_001616	FUN_001616-T1	mRNA	scaffold_2	7200564	7202459	+	SOX4	Transcription factor SOX-4				PF00505;PF09011	IPR009071 High mobility group box domain;IPR017386 Transcription factor SOX-12/11/4;IPR036910 High mobility group box domain superfamily;IPR050140 SRY-related HMG-box transcription factor-like	ENOG503BBKG	K:(K) Transcription	GO_component: GO:0005634 - nucleus [Evidence IEA];GO_function: GO:0001228 - DNA-binding transcription activator activity, RNA polymerase II-specific [Evidence IEA];GO_function: GO:0000981 - DNA-binding transcription factor activity, RNA polymerase II-specific [Evidence IEA];GO_function: GO:0000978 - RNA polymerase II cis-regulatory region sequence-specific DNA binding [Evidence IEA];GO_process: G…
FUN_094754	FUN_094754-T1	mRNA	scaffold_2	7263547	7597652	+		hypothetical protein		2.7.11.1		PF00069;PF07714	IPR000719 Protein kinase domain;IPR008271 Serine/threonine-protein kinase, active site;IPR011009 Protein kinase-like domain superfamily;IPR017441 Protein kinase, ATP binding site	ENOG50KOG0588	T:(T) Signal transduction mechanisms	GO_component: GO:0005737 - cytoplasm [Evidence IEA];GO_function: GO:0004674 - protein serine/threonine kinase activity [Evidence IEA];GO_function: GO:0005524 - ATP binding [Evidence IEA];GO_function: GO:0004672 - protein kinase activity [Evidence IEA];GO_process: GO:0006468 - protein phosphorylation [Evidence IEA];GO_process: GO:0035556 - intracellular signal transduction [Evidence IEA]
FUN_001617	FUN_001617-T1	mRNA	scaffold_2	7263891	7583581	+		hypothetical protein		2.7.11.1		PF00069;PF07714	IPR000719 Protein kinase domain;IPR008271 Serine/threonine-protein kinase, active site;IPR011009 Protein kinase-like domain superfamily;IPR017441 Protein kinase, ATP binding site	ENOG50KOG0588	T:(T) Signal transduction mechanisms	GO_component: GO:0005737 - cytoplasm [Evidence IEA];GO_function: GO:0004674 - protein serine/threonine kinase activity [Evidence IEA];GO_function: GO:0005524 - ATP binding [Evidence IEA];GO_function: GO:0004672 - protein kinase activity [Evidence IEA];GO_process: GO:0006468 - protein phosphorylation [Evidence IEA];GO_process: GO:0035556 - intracellular signal transduction [Evidence IEA]
FUN_001619	FUN_001619-T1	mRNA	scaffold_2	7621358	7622575	-		hypothetical protein				PF02317	IPR003421 Opine dehydrogenase;IPR008927 6-phosphogluconate dehydrogenase-like, C-terminal domain superfamily;IPR013328 6-phosphogluconate dehydrogenase, domain 2;IPR036291 NAD(P)-binding domain superfamily;IPR051729 Opine/Lysopine Dehydrogenase	ENOG503BYG1	S:(S) Function unknown	GO_function: GO:0016491 - oxidoreductase activity [Evidence IEA]
FUN_001626	FUN_001626-T1	mRNA	scaffold_2	7734005	7736121	-		hypothetical protein				PF02317	IPR003421 Opine dehydrogenase;IPR008927 6-phosphogluconate dehydrogenase-like, C-terminal domain superfamily;IPR013328 6-phosphogluconate dehydrogenase, domain 2;IPR036291 NAD(P)-binding domain superfamily;IPR051729 Opine/Lysopine Dehydrogenase	ENOG503BYG1	S:(S) Function unknown	GO_function: GO:0016491 - oxidoreductase activity [Evidence IEA]
FUN_001628	FUN_001628-T1	mRNA	scaffold_2	7741920	7754116	+	APOL3_1	apolipoprotein					IPR008405 Apolipoprotein L	ENOG503BNMH	S:(S) Function unknown	GO_component: GO:0005576 - extracellular region [Evidence IEA];GO_component: GO:0016020 - membrane [Evidence IEA];GO_function: GO:0008289 - lipid binding [Evidence IEA];GO_process: GO:0006869 - lipid transport [Evidence IEA];GO_process: GO:0042157 - lipoprotein metabolic process [Evidence IEA]
FUN_001628	FUN_001628-T2	mRNA	scaffold_2	7741920	7754116	+	APOL3_1	apolipoprotein, variant 2					IPR008405 Apolipoprotein L	ENOG503BNMH	S:(S) Function unknown	GO_component: GO:0005576 - extracellular region [Evidence IEA];GO_component: GO:0016020 - membrane [Evidence IEA];GO_function: GO:0008289 - lipid binding [Evidence IEA];GO_process: GO:0006869 - lipid transport [Evidence IEA];GO_process: GO:0042157 - lipoprotein metabolic process [Evidence IEA]
FUN_001631	FUN_001631-T1	mRNA	scaffold_2	7757285	7788671	-	SMC2_1	Structural maintenance of chromosomes protein 2				PF02463;PF13175;PF13304;PF13476	IPR003395 RecF/RecN/SMC, N-terminal;IPR027120 Smc2, ATP-binding cassette domain;IPR027417 P-loop containing nucleoside triphosphate hydrolase	ENOG503B9Q1	B:(B) Chromatin structure and dynamics;D:(D) Cell cycle control, cell division, chromosome partitioning	GO_function: GO:0005524 - ATP binding [Evidence IEA];GO_function: GO:0016887 - ATP hydrolysis activity [Evidence IEA]
FUN_001632	FUN_001632-T1	mRNA	scaffold_2	7824336	8036299	-		hypothetical protein
FUN_001636	FUN_001636-T1	mRNA	scaffold_2	7860814	7862031	-		hypothetical protein				PF02317	IPR003421 Opine dehydrogenase;IPR008927 6-phosphogluconate dehydrogenase-like, C-terminal domain superfamily;IPR013328 6-phosphogluconate dehydrogenase, domain 2;IPR036291 NAD(P)-binding domain superfamily;IPR051729 Opine/Lysopine Dehydrogenase	ENOG503BYG1	S:(S) Function unknown	GO_function: GO:0016491 - oxidoreductase activity [Evidence IEA]
FUN_001641	FUN_001641-T1	mRNA	scaffold_2	7883240	7884445	-		hypothetical protein				PF02317	IPR003421 Opine dehydrogenase;IPR008927 6-phosphogluconate dehydrogenase-like, C-terminal domain superfamily;IPR013328 6-phosphogluconate dehydrogenase, domain 2;IPR036291 NAD(P)-binding domain superfamily;IPR051729 Opine/Lysopine Dehydrogenase	ENOG503A0B5	S:(S) Function unknown	GO_function: GO:0016491 - oxidoreductase activity [Evidence IEA]
FUN_001644	FUN_001644-T1	mRNA	scaffold_2	7906045	7907372	-		hypothetical protein				PF02317	IPR003421 Opine dehydrogenase;IPR008927 6-phosphogluconate dehydrogenase-like, C-terminal domain superfamily;IPR013328 6-phosphogluconate dehydrogenase, domain 2;IPR036291 NAD(P)-binding domain superfamily;IPR051729 Opine/Lysopine Dehydrogenase	ENOG503BYG1	S:(S) Function unknown	GO_function: GO:0016491 - oxidoreductase activity [Evidence IEA]
FUN_001646	FUN_001646-T1	mRNA	scaffold_2	7925013	7930097	+		hypothetical protein					IPR008405 Apolipoprotein L	ENOG503BM4V	S:(S) Function unknown	GO_component: GO:0005576 - extracellular region [Evidence IEA];GO_function: GO:0008289 - lipid binding [Evidence IEA];GO_process: GO:0006869 - lipid transport [Evidence IEA];GO_process: GO:0042157 - lipoprotein metabolic process [Evidence IEA]
FUN_001646	FUN_001646-T2	mRNA	scaffold_2	7925013	7930097	+		hypothetical protein					IPR008405 Apolipoprotein L	ENOG503BM4V	S:(S) Function unknown	GO_component: GO:0005576 - extracellular region [Evidence IEA];GO_function: GO:0008289 - lipid binding [Evidence IEA];GO_process: GO:0006869 - lipid transport [Evidence IEA];GO_process: GO:0042157 - lipoprotein metabolic process [Evidence IEA]
FUN_001648	FUN_001648-T1	mRNA	scaffold_2	7932605	7936099	+	APOL3_3	apolipoprotein					IPR008405 Apolipoprotein L	ENOG503BNMH	S:(S) Function unknown	GO_component: GO:0005576 - extracellular region [Evidence IEA];GO_component: GO:0016020 - membrane [Evidence IEA];GO_function: GO:0008289 - lipid binding [Evidence IEA];GO_process: GO:0006869 - lipid transport [Evidence IEA];GO_process: GO:0042157 - lipoprotein metabolic process [Evidence IEA]
FUN_001649	FUN_001649-T1	mRNA	scaffold_2	7938522	7992063	-	SMC2_2	Structural maintenance of chromosomes protein 2			417at6447	PF02463;PF06470	IPR003395 RecF/RecN/SMC, N-terminal;IPR010935 SMCs flexible hinge;IPR024704 Structural maintenance of chromosomes protein;IPR027120 Smc2, ATP-binding cassette domain;IPR027417 P-loop containing nucleoside triphosphate hydrolase;IPR036277 SMCs flexible hinge superfamily	ENOG503B9Q1	B:(B) Chromatin structure and dynamics;D:(D) Cell cycle control, cell division, chromosome partitioning	GO_component: GO:0005694 - chromosome [Evidence IEA];GO_function: GO:0005515 - protein binding [Evidence IEA];GO_function: GO:0005524 - ATP binding [Evidence IEA];GO_function: GO:0016887 - ATP hydrolysis activity [Evidence IEA];GO_process: GO:0051276 - chromosome organization [Evidence IEA]
FUN_001650	FUN_001650-T1	mRNA	scaffold_2	7992197	8024706	+	DPH2	Diphthamide biosynthesis protein 2			4967at6447	PF01866	IPR010014 Diphthamide synthesis DHP2;IPR016435 Diphthamide synthesis DPH1/DPH2;IPR042263 Diphthamide synthesis DPH1/DPH2, domain 1;IPR042265 Diphthamide synthesis DPH1/DPH2, domain 3	ENOG503BG2P	J:(J) Translation, ribosomal structure and biogenesis	GO_function: GO:0090560 - 2-(3-amino-3-carboxypropyl)histidine synthase activity [Evidence IEA];GO_process: GO:0017183 - protein histidyl modification to diphthamide [Evidence IEA]
FUN_001651	FUN_001651-T1	mRNA	scaffold_2	8042564	8046076	-		hypothetical protein
FUN_001654	FUN_001654-T1	mRNA	scaffold_2	8052030	8052809	+		hypothetical protein
FUN_001655	FUN_001655-T1	mRNA	scaffold_2	8063346	8112264	+		hypothetical protein				PF12736	IPR025946 CABIT domain
FUN_001658	FUN_001658-T1	mRNA	scaffold_2	8126896	8127259	+		hypothetical protein
FUN_001659	FUN_001659-T1	mRNA	scaffold_2	8137121	8137774	-		hypothetical protein
FUN_001670	FUN_001670-T1	mRNA	scaffold_2	8270680	8274102	-		hypothetical protein
FUN_001678	FUN_001678-T1	mRNA	scaffold_2	8423656	8498399	+		hypothetical protein			3616at6447	PF04515	IPR001810 F-box domain;IPR007603 Choline transporter-like	ENOG503B9Z8	I:(I) Lipid transport and metabolism	GO_component: GO:0016020 - membrane [Evidence IEA];GO_function: GO:0005515 - protein binding [Evidence IEA];GO_function: GO:0022857 - transmembrane transporter activity [Evidence IEA];GO_process: GO:0055085 - transmembrane transport [Evidence IEA]
FUN_001679	FUN_001679-T1	mRNA	scaffold_2	8521700	8546484	+		hypothetical protein				PF04515;PF13878	IPR007603 Choline transporter-like;IPR028005 N-acetyltransferase ESCO, zinc-finger	ENOG503B9Z8	I:(I) Lipid transport and metabolism	GO_component: GO:0016020 - membrane [Evidence IEA];GO_function: GO:0022857 - transmembrane transporter activity [Evidence IEA];GO_process: GO:0055085 - transmembrane transport [Evidence IEA]
FUN_001680	FUN_001680-T1	mRNA	scaffold_2	8552162	8555530	-		hypothetical protein
FUN_001681	FUN_001681-T1	mRNA	scaffold_2	8566015	8576683	+	ESCO2	N-acetyltransferase esco2				PF13878;PF13880	IPR028005 N-acetyltransferase ESCO, zinc-finger;IPR028009 N-acetyltransferase ESCO, acetyl-transferase domain	ENOG503BH04	L:(L) Replication, recombination and repair	GO_component: GO:0005634 - nucleus [Evidence IEA];GO_component: GO:0000785 - chromatin [Evidence IEA];GO_function: GO:0061733 - peptide-lysine-N-acetyltransferase activity [Evidence IEA];GO_process: GO:0007064 - mitotic sister chromatid cohesion [Evidence IEA]
FUN_001682	FUN_001682-T1	mRNA	scaffold_2	8576819	8577642	+		hypothetical protein
FUN_001684	FUN_001684-T1	mRNA	scaffold_2	8622371	8635273	-	BMP2_1	Bone morphoproteintic protein 2				PF00019	IPR001839 Transforming growth factor-beta, C-terminal;IPR015615 Transforming growth factor-beta-related;IPR017948 Transforming growth factor beta, conserved site;IPR029034 Cystine-knot cytokine	ENOG503BDZD	O:(O) Posttranslational modification, protein turnover, chaperones	GO_component: GO:0005576 - extracellular region [Evidence IEA];GO_component: GO:0005615 - extracellular space [Evidence IEA];GO_function: GO:0005125 - cytokine activity [Evidence IEA];GO_function: GO:0008083 - growth factor activity [Evidence IEA]
FUN_001688	FUN_001688-T1	mRNA	scaffold_2	8675224	8676637	+		hypothetical protein
FUN_001691	FUN_001691-T1	mRNA	scaffold_2	8685362	8691558	+		hypothetical protein
FUN_001698	FUN_001698-T1	mRNA	scaffold_2	8740320	8740832	-		hypothetical protein
FUN_001702	FUN_001702-T1	mRNA	scaffold_2	8841323	8843423	-		hypothetical protein
FUN_001707	FUN_001707-T1	mRNA	scaffold_2	8960580	8970339	+		hypothetical protein					IPR001810 F-box domain	ENOG503B9Z8	I:(I) Lipid transport and metabolism	GO_function: GO:0005515 - protein binding [Evidence IEA]
FUN_001708	FUN_001708-T1	mRNA	scaffold_2	8985798	8991246	+		hypothetical protein					IPR001734 Sodium/solute symporter;IPR038377 Sodium/glucose symporter superfamily;IPR052244 High-affinity choline transporter	ENOG503BCRC	I:(I) Lipid transport and metabolism	GO_component: GO:0016020 - membrane [Evidence IEA];GO_component: GO:0005886 - plasma membrane [Evidence IEA];GO_function: GO:0005307 - choline:sodium symporter activity [Evidence IEA];GO_function: GO:0022857 - transmembrane transporter activity [Evidence IEA];GO_process: GO:0008292 - acetylcholine biosynthetic process [Evidence IEA];GO_process: GO:0055085 - transmembrane transport [Evidence IEA];…
FUN_001709	FUN_001709-T1	mRNA	scaffold_2	8992761	9027973	+	ERCC2_1	General transcription and DNA repair factor IIH helicase subunit XPD		3.6.4.12			IPR001734 Sodium/solute symporter;IPR002464 DNA/RNA helicase, ATP-dependent, DEAH-box type, conserved site;IPR010614 RAD3-like helicase, DEAD;IPR014013 Helicase superfamily 1/2, ATP-binding domain, DinG/Rad3-type;IPR027417 P-loop containing nucleoside triphosphate hydrolase;IPR038377 Sodium/glucose symporter superfamily;IPR045028 Helicase superfamily 1/2, DinG/Rad3-like	ENOG503BBBF	K:(K) Transcription;L:(L) Replication, recombination and repair	GO_component: GO:0016020 - membrane [Evidence IEA];GO_component: GO:0005634 - nucleus [Evidence IEA];GO_function: GO:0005524 - ATP binding [Evidence IEA];GO_function: GO:0003684 - damaged DNA binding [Evidence IEA];GO_function: GO:0003677 - DNA binding [Evidence IEA];GO_function: GO:0003678 - DNA helicase activity [Evidence IEA];GO_function: GO:0022857 - transmembrane transporter activity [Eviden…
FUN_001711	FUN_001711-T1	mRNA	scaffold_2	9046845	9047860	+		hypothetical protein
FUN_001712	FUN_001712-T1	mRNA	scaffold_2	9071226	9072802	+		hypothetical protein
FUN_001715	FUN_001715-T1	mRNA	scaffold_2	9159462	9161367	+		hypothetical protein
FUN_001716	FUN_001716-T1	mRNA	scaffold_2	9182806	9312244	-		hypothetical protein				PF00435	IPR002017 Spectrin repeat;IPR002048 EF-hand domain;IPR011992 EF-hand domain pair;IPR018159 Spectrin/alpha-actinin;IPR018247 EF-Hand 1, calcium-binding site;IPR043197 Plakin	ENOG503BA4T	Z:(Z) Cytoskeleton	GO_component: GO:0005882 - intermediate filament [Evidence IEA];GO_component: GO:0005737 - cytoplasm [Evidence IEA];GO_component: GO:0030056 - hemidesmosome [Evidence IEA];GO_component: GO:0016020 - membrane [Evidence IEA];GO_function: GO:0005509 - calcium ion binding [Evidence IEA];GO_function: GO:0005198 - structural molecule activity [Evidence IEA];GO_function: GO:0005515 - protein binding [Ev…
FUN_001716	FUN_001716-T2	mRNA	scaffold_2	9182806	9312244	-		hypothetical protein				PF00435;PF02187;PF13202;PF13499;PF13833	IPR002017 Spectrin repeat;IPR002048 EF-hand domain;IPR003108 GAR domain;IPR011992 EF-hand domain pair;IPR018159 Spectrin/alpha-actinin;IPR018247 EF-Hand 1, calcium-binding site;IPR036534 GAR domain superfamily;IPR043197 Plakin	ENOG503BA4T	Z:(Z) Cytoskeleton	GO_component: GO:0005882 - intermediate filament [Evidence IEA];GO_component: GO:0005737 - cytoplasm [Evidence IEA];GO_component: GO:0030056 - hemidesmosome [Evidence IEA];GO_component: GO:0016020 - membrane [Evidence IEA];GO_function: GO:0005509 - calcium ion binding [Evidence IEA];GO_function: GO:0005198 - structural molecule activity [Evidence IEA];GO_function: GO:0005515 - protein binding [Ev…
FUN_001717	FUN_001717-T1	mRNA	scaffold_2	9312245	9321035	-		hypothetical protein				PF00435	IPR002017 Spectrin repeat;IPR018159 Spectrin/alpha-actinin;IPR043197 Plakin	ENOG503BA4T	Z:(Z) Cytoskeleton	GO_component: GO:0005882 - intermediate filament [Evidence IEA];GO_component: GO:0005737 - cytoplasm [Evidence IEA];GO_component: GO:0030056 - hemidesmosome [Evidence IEA];GO_component: GO:0016020 - membrane [Evidence IEA];GO_function: GO:0005198 - structural molecule activity [Evidence IEA];GO_function: GO:0005515 - protein binding [Evidence IEA];GO_process: GO:0045104 - intermediate filament cy…
FUN_001717	FUN_001717-T2	mRNA	scaffold_2	9312245	9321035	-		hypothetical protein				PF00435	IPR002017 Spectrin repeat;IPR018159 Spectrin/alpha-actinin;IPR043197 Plakin	ENOG503BA4T	Z:(Z) Cytoskeleton	GO_component: GO:0005882 - intermediate filament [Evidence IEA];GO_component: GO:0005737 - cytoplasm [Evidence IEA];GO_component: GO:0030056 - hemidesmosome [Evidence IEA];GO_component: GO:0016020 - membrane [Evidence IEA];GO_function: GO:0005198 - structural molecule activity [Evidence IEA];GO_function: GO:0005515 - protein binding [Evidence IEA];GO_process: GO:0045104 - intermediate filament cy…
FUN_001717	FUN_001717-T3	mRNA	scaffold_2	9312245	9321035	-		hypothetical protein				PF00435	IPR002017 Spectrin repeat;IPR018159 Spectrin/alpha-actinin;IPR043197 Plakin	ENOG503BA4T	Z:(Z) Cytoskeleton	GO_component: GO:0005882 - intermediate filament [Evidence IEA];GO_component: GO:0005737 - cytoplasm [Evidence IEA];GO_component: GO:0030056 - hemidesmosome [Evidence IEA];GO_component: GO:0016020 - membrane [Evidence IEA];GO_function: GO:0005198 - structural molecule activity [Evidence IEA];GO_function: GO:0005515 - protein binding [Evidence IEA];GO_process: GO:0045104 - intermediate filament cy…
FUN_001718	FUN_001718-T1	mRNA	scaffold_2	9316866	9333811	-		hypothetical protein				PF00435	IPR002017 Spectrin repeat;IPR004102 Poly(ADP-ribose) polymerase, regulatory domain;IPR018159 Spectrin/alpha-actinin	ENOG503BA4T	Z:(Z) Cytoskeleton	GO_function: GO:0003950 - NAD+ poly-ADP-ribosyltransferase activity [Evidence IEA];GO_function: GO:0005515 - protein binding [Evidence IEA]
FUN_001720	FUN_001720-T1	mRNA	scaffold_2	9334163	9382987	-		hypothetical protein				PF00435;PF00681	IPR001101 Plectin repeat;IPR002017 Spectrin repeat;IPR018159 Spectrin/alpha-actinin;IPR035915 Plakin repeat superfamily	ENOG503BA4T	Z:(Z) Cytoskeleton	GO_component: GO:0005856 - cytoskeleton [Evidence IEA];GO_function: GO:0005515 - protein binding [Evidence IEA]
FUN_001721	FUN_001721-T1	mRNA	scaffold_2	9409570	9411955	-		hypothetical protein				PF00435	IPR002017 Spectrin repeat;IPR018159 Spectrin/alpha-actinin;IPR043197 Plakin	ENOG503BA4T	Z:(Z) Cytoskeleton	GO_component: GO:0005882 - intermediate filament [Evidence IEA];GO_component: GO:0005737 - cytoplasm [Evidence IEA];GO_component: GO:0030056 - hemidesmosome [Evidence IEA];GO_component: GO:0016020 - membrane [Evidence IEA];GO_function: GO:0005198 - structural molecule activity [Evidence IEA];GO_function: GO:0005515 - protein binding [Evidence IEA];GO_process: GO:0045104 - intermediate filament cy…
FUN_001735	FUN_001735-T1	mRNA	scaffold_2	9702890	9708163	+		hypothetical protein		2.1.1.67			IPR008854 TPMT family;IPR029063 S-adenosyl-L-methionine-dependent methyltransferase superfamily	ENOG503B9J5	S:(S) Function unknown	GO_function: GO:0008757 - S-adenosylmethionine-dependent methyltransferase activity [Evidence IEA];GO_function: GO:0008119 - thiopurine S-methyltransferase activity [Evidence IEA]
FUN_001737	FUN_001737-T1	mRNA	scaffold_2	9736555	9742639	-		hypothetical protein		2.1.1.67		PF05724	IPR008854 TPMT family;IPR029063 S-adenosyl-L-methionine-dependent methyltransferase superfamily	ENOG501S0RC	Q:(Q) Secondary metabolites biosynthesis, transport and catabolism	GO_function: GO:0008757 - S-adenosylmethionine-dependent methyltransferase activity [Evidence IEA];GO_function: GO:0008119 - thiopurine S-methyltransferase activity [Evidence IEA]
FUN_001740	FUN_001740-T1	mRNA	scaffold_2	9807844	9833952	-		hypothetical protein				PF00435	IPR002017 Spectrin repeat;IPR004102 Poly(ADP-ribose) polymerase, regulatory domain;IPR018159 Spectrin/alpha-actinin	ENOG503BA4T	Z:(Z) Cytoskeleton	GO_function: GO:0003950 - NAD+ poly-ADP-ribosyltransferase activity [Evidence IEA];GO_function: GO:0005515 - protein binding [Evidence IEA]
FUN_001747	FUN_001747-T1	mRNA	scaffold_2	9911080	9926586	+		hypothetical protein					IPR000742 EGF-like domain;IPR042635 MEGF10/SREC1/2-like			GO_function: GO:0005044 - scavenger receptor activity [Evidence IEA]
FUN_001748	FUN_001748-T1	mRNA	scaffold_2	9934167	9942823	-		hypothetical protein		2.1.1.67			IPR008854 TPMT family;IPR029063 S-adenosyl-L-methionine-dependent methyltransferase superfamily	ENOG501S0RC	Q:(Q) Secondary metabolites biosynthesis, transport and catabolism	GO_function: GO:0008757 - S-adenosylmethionine-dependent methyltransferase activity [Evidence IEA];GO_function: GO:0008119 - thiopurine S-methyltransferase activity [Evidence IEA]
FUN_001754	FUN_001754-T1	mRNA	scaffold_2	9971050	9972914	+		hypothetical protein
FUN_001756	FUN_001756-T1	mRNA	scaffold_2	10006376	10071908	+		hypothetical protein
FUN_001756	FUN_001756-T2	mRNA	scaffold_2	10006376	10071908	+		hypothetical protein
FUN_001757	FUN_001757-T1	mRNA	scaffold_2	10011220	10011953	-		hypothetical protein
FUN_001758	FUN_001758-T1	mRNA	scaffold_2	10033114	10035455	+		hypothetical protein
FUN_001763	FUN_001763-T1	mRNA	scaffold_2	10114654	10119677	-		hypothetical protein		2.1.1.67		PF05724	IPR008854 TPMT family;IPR029063 S-adenosyl-L-methionine-dependent methyltransferase superfamily	ENOG503B9J5	S:(S) Function unknown	GO_function: GO:0008757 - S-adenosylmethionine-dependent methyltransferase activity [Evidence IEA];GO_function: GO:0008119 - thiopurine S-methyltransferase activity [Evidence IEA]
FUN_001767	FUN_001767-T1	mRNA	scaffold_2	10159380	10161164	+		hypothetical protein
FUN_001771	FUN_001771-T1	mRNA	scaffold_2	10183884	10192202	-		hypothetical protein		2.1.1.67		PF05724	IPR008854 TPMT family;IPR029063 S-adenosyl-L-methionine-dependent methyltransferase superfamily	ENOG503B9J5	S:(S) Function unknown	GO_function: GO:0008757 - S-adenosylmethionine-dependent methyltransferase activity [Evidence IEA];GO_function: GO:0008119 - thiopurine S-methyltransferase activity [Evidence IEA]
FUN_001772	FUN_001772-T1	mRNA	scaffold_2	10192436	10231874	+		hypothetical protein		2.1.1.67		PF05724	IPR008854 TPMT family;IPR029063 S-adenosyl-L-methionine-dependent methyltransferase superfamily	ENOG503B9J5	S:(S) Function unknown	GO_function: GO:0008757 - S-adenosylmethionine-dependent methyltransferase activity [Evidence IEA];GO_function: GO:0008119 - thiopurine S-methyltransferase activity [Evidence IEA]
FUN_001779	FUN_001779-T1	mRNA	scaffold_2	10243200	10762215	+	PTK2_1	Putative serine/threonine protein phosphatase, variant 2		2.7.10.2		PF00373;PF18038;PF21477	IPR000299 FERM domain;IPR000719 Protein kinase domain;IPR001245 Serine-threonine/tyrosine-protein kinase, catalytic domain;IPR011009 Protein kinase-like domain superfamily;IPR011993 PH-like domain superfamily;IPR014352 FERM/acyl-CoA-binding protein superfamily;IPR017441 Protein kinase, ATP binding site;IPR019748 FERM central domain;IPR019749 Band 4.1 domain;IPR029071 Ubiquitin-like domain superfa…	ENOG503B9QA	T:(T) Signal transduction mechanisms	GO_component: GO:0005856 - cytoskeleton [Evidence IEA];GO_function: GO:0005524 - ATP binding [Evidence IEA];GO_function: GO:0004672 - protein kinase activity [Evidence IEA];GO_process: GO:0006468 - protein phosphorylation [Evidence IEA]
FUN_001779	FUN_001779-T2	mRNA	scaffold_2	10243200	10762215	+	PTK2_1	Putative serine/threonine protein phosphatase		2.7.10.2		PF00373;PF18038;PF21477	IPR000299 FERM domain;IPR000719 Protein kinase domain;IPR001245 Serine-threonine/tyrosine-protein kinase, catalytic domain;IPR011009 Protein kinase-like domain superfamily;IPR011993 PH-like domain superfamily;IPR014352 FERM/acyl-CoA-binding protein superfamily;IPR017441 Protein kinase, ATP binding site;IPR019748 FERM central domain;IPR019749 Band 4.1 domain;IPR029071 Ubiquitin-like domain superfa…	ENOG503B9QA	T:(T) Signal transduction mechanisms	GO_component: GO:0005856 - cytoskeleton [Evidence IEA];GO_function: GO:0005524 - ATP binding [Evidence IEA];GO_function: GO:0004672 - protein kinase activity [Evidence IEA];GO_process: GO:0006468 - protein phosphorylation [Evidence IEA]
FUN_094755	FUN_094755-T1	mRNA	scaffold_2	10413295	10441156	-	PAQR8_3	steroid hormone receptor activity				PF03006	IPR004254 AdipoR/Haemolysin-III-related	ENOG503BB93	T:(T) Signal transduction mechanisms	GO_component: GO:0016020 - membrane [Evidence IEA];GO_function: GO:0038023 - signaling receptor activity [Evidence IEA]
FUN_094756	FUN_094756-T1	mRNA	scaffold_2	10582034	10584806	+	KRBA2	KRAB-A domain-containing protein 2					IPR036397 Ribonuclease H superfamily	ENOG503BFFD	L:(L) Replication, recombination and repair	GO_function: GO:0003676 - nucleic acid binding [Evidence IEA]
FUN_001781	FUN_001781-T1	mRNA	scaffold_2	10768646	10795863	+	PTK2_3	Putative serine/threonine protein phosphatase		2.7.10.2		PF03623	IPR000719 Protein kinase domain;IPR001245 Serine-threonine/tyrosine-protein kinase, catalytic domain;IPR005189 Focal adhesion kinase, targeting (FAT) domain;IPR008266 Tyrosine-protein kinase, active site;IPR011009 Protein kinase-like domain superfamily;IPR020635 Tyrosine-protein kinase, catalytic domain;IPR036137 Focal adhesion kinase, targeting (FAT) domain superfamily	ENOG503B9QA	T:(T) Signal transduction mechanisms	GO_component: GO:0005925 - focal adhesion [Evidence IEA];GO_function: GO:0004713 - protein tyrosine kinase activity [Evidence IEA];GO_function: GO:0004672 - protein kinase activity [Evidence IEA];GO_function: GO:0005524 - ATP binding [Evidence IEA];GO_process: GO:0006468 - protein phosphorylation [Evidence IEA];GO_process: GO:0007172 - signal complex assembly [Evidence IEA]
FUN_001781	FUN_001781-T2	mRNA	scaffold_2	10768646	10795863	+	PTK2_3	Putative serine/threonine protein phosphatase, variant 2		2.7.10.2		PF03623	IPR005189 Focal adhesion kinase, targeting (FAT) domain;IPR036137 Focal adhesion kinase, targeting (FAT) domain superfamily	ENOG503B9QA	T:(T) Signal transduction mechanisms	GO_component: GO:0005925 - focal adhesion [Evidence IEA];GO_function: GO:0004713 - protein tyrosine kinase activity [Evidence IEA];GO_process: GO:0006468 - protein phosphorylation [Evidence IEA];GO_process: GO:0007172 - signal complex assembly [Evidence IEA]
FUN_001782	FUN_001782-T1	mRNA	scaffold_2	10812902	10821397	-		hypothetical protein					IPR000742 EGF-like domain;IPR042635 MEGF10/SREC1/2-like			GO_function: GO:0005044 - scavenger receptor activity [Evidence IEA]
FUN_001784	FUN_001784-T1	mRNA	scaffold_2	10868068	10886556	-		hypothetical protein					IPR042635 MEGF10/SREC1/2-like			GO_function: GO:0005044 - scavenger receptor activity [Evidence IEA]
FUN_001788	FUN_001788-T1	mRNA	scaffold_2	10926467	10940614	+		hypothetical protein				PF00041	IPR003961 Fibronectin type III;IPR013783 Immunoglobulin-like fold;IPR036116 Fibronectin type III superfamily;IPR053073 Interleukin-11/Interleukin-27 subunit beta	ENOG503BSGZ	T:(T) Signal transduction mechanisms	GO_function: GO:0005515 - protein binding [Evidence IEA]
FUN_001791	FUN_001791-T1	mRNA	scaffold_2	11006287	11016038	+	PTK2_5	Putative serine/threonine protein phosphatase		2.7.10.2		PF03623	IPR005189 Focal adhesion kinase, targeting (FAT) domain;IPR036137 Focal adhesion kinase, targeting (FAT) domain superfamily	ENOG503B9QA	T:(T) Signal transduction mechanisms	GO_component: GO:0005925 - focal adhesion [Evidence IEA];GO_function: GO:0004713 - protein tyrosine kinase activity [Evidence IEA];GO_process: GO:0006468 - protein phosphorylation [Evidence IEA];GO_process: GO:0007172 - signal complex assembly [Evidence IEA]
FUN_001792	FUN_001792-T1	mRNA	scaffold_2	11018879	11024429	-		hypothetical protein
FUN_001796	FUN_001796-T1	mRNA	scaffold_2	11079401	11089678	+		hypothetical protein					IPR000489 Pterin-binding domain;IPR008979 Galactose-binding-like domain superfamily			GO_process: GO:0042558 - pteridine-containing compound metabolic process [Evidence IEA]
FUN_001798	FUN_001798-T1	mRNA	scaffold_2	11112172	11117389	+		hypothetical protein				PF03171;PF14226	IPR005123 Oxoglutarate/iron-dependent dioxygenase domain;IPR026992 Non-haem dioxygenase N-terminal domain;IPR027443 Isopenicillin N synthase-like superfamily;IPR044861 Isopenicillin N synthase-like, Fe(2+) 2OG dioxygenase domain;IPR050231 Iron/ascorbate-dependent oxidoreductase	ENOG502JR3E	C:(C) Energy production and conversion
FUN_001799	FUN_001799-T1	mRNA	scaffold_2	11127697	11137329	+		hypothetical protein				PF03171;PF14226	IPR005123 Oxoglutarate/iron-dependent dioxygenase domain;IPR026992 Non-haem dioxygenase N-terminal domain;IPR027443 Isopenicillin N synthase-like superfamily;IPR044861 Isopenicillin N synthase-like, Fe(2+) 2OG dioxygenase domain	ENOG501SJPB	C:(C) Energy production and conversion
FUN_001801	FUN_001801-T1	mRNA	scaffold_2	11143489	11150093	+	COX5B	Cytochrome c oxidase subunit 5B				PF01215	IPR002124 Cytochrome c oxidase, subunit Vb;IPR036972 Cytochrome c oxidase, subunit Vb superfamily	ENOG503BSQ7	C:(C) Energy production and conversion	GO_component: GO:0045277 - respiratory chain complex IV [Evidence IEA];GO_component: GO:0005740 - mitochondrial envelope [Evidence IEA];GO_process: GO:0006123 - mitochondrial electron transport, cytochrome c to oxygen [Evidence IEA]
FUN_001802	FUN_001802-T1	mRNA	scaffold_2	11155748	11214613	+	RB1CC1_1	Autophagy-related protein 11					IPR040040 Autophagy-related protein 11	ENOG503BHVZ	K:(K) Transcription;T:(T) Signal transduction mechanisms	GO_component: GO:0034045 - phagophore assembly site membrane [Evidence IEA];GO_component: GO:1990316 - Atg1/ULK1 kinase complex [Evidence IEA];GO_function: GO:0019901 - protein kinase binding [Evidence IEA];GO_function: GO:0060090 - molecular adaptor activity [Evidence IEA];GO_process: GO:0000045 - autophagosome assembly [Evidence IEA];GO_process: GO:0034517 - ribophagy [Evidence IEA];GO_process:…
FUN_001803	FUN_001803-T1	mRNA	scaffold_2	11260341	11278997	+	RB1CC1_2	Autophagy-related protein 11					IPR040040 Autophagy-related protein 11	ENOG503BHVZ	K:(K) Transcription;T:(T) Signal transduction mechanisms	GO_component: GO:0034045 - phagophore assembly site membrane [Evidence IEA];GO_component: GO:1990316 - Atg1/ULK1 kinase complex [Evidence IEA];GO_function: GO:0019901 - protein kinase binding [Evidence IEA];GO_function: GO:0060090 - molecular adaptor activity [Evidence IEA];GO_process: GO:0000045 - autophagosome assembly [Evidence IEA];GO_process: GO:0034517 - ribophagy [Evidence IEA];GO_process:…
FUN_001806	FUN_001806-T1	mRNA	scaffold_2	11369829	11395745	+	RB1CC1_3	Autophagy-related protein 11			1508at6447	PF10377	IPR019460 Autophagy-related protein 11, C-terminal;IPR040040 Autophagy-related protein 11;IPR045326 Autophagy protein ATG17-like domain	ENOG503BHVZ	K:(K) Transcription;T:(T) Signal transduction mechanisms	GO_component: GO:0034045 - phagophore assembly site membrane [Evidence IEA];GO_component: GO:1990316 - Atg1/ULK1 kinase complex [Evidence IEA];GO_function: GO:0019901 - protein kinase binding [Evidence IEA];GO_function: GO:0060090 - molecular adaptor activity [Evidence IEA];GO_process: GO:0000045 - autophagosome assembly [Evidence IEA];GO_process: GO:0034517 - ribophagy [Evidence IEA];GO_process:…
FUN_001810	FUN_001810-T1	mRNA	scaffold_2	11493648	11494774	+		hypothetical protein
FUN_001812	FUN_001812-T1	mRNA	scaffold_2	11533266	11544395	+		hypothetical protein			6192at6447	PF03615	IPR003902 Transcription regulator GCM domain;IPR036115 GCM domain superfamily;IPR039791 Chorion-specific transcription factor GCM;IPR043020 GCM domain, large subdomain;IPR043021 GCM, small domain	ENOG503BCPM	K:(K) Transcription	GO_component: GO:0005634 - nucleus [Evidence IEA];GO_function: GO:0001228 - DNA-binding transcription activator activity, RNA polymerase II-specific [Evidence IEA];GO_function: GO:0000981 - DNA-binding transcription factor activity, RNA polymerase II-specific [Evidence IEA];GO_function: GO:0003677 - DNA binding [Evidence IEA];GO_function: GO:0000978 - RNA polymerase II cis-regulatory region seque…
FUN_001814	FUN_001814-T1	mRNA	scaffold_2	11560826	11564787	-		hypothetical protein					IPR002035 von Willebrand factor, type A;IPR036465 von Willebrand factor A-like domain superfamily	ENOG503BSQ9	S:(S) Function unknown
FUN_001816	FUN_001816-T1	mRNA	scaffold_2	11567271	11567716	-		hypothetical protein
FUN_001817	FUN_001817-T1	mRNA	scaffold_2	11570789	11652962	-		hypothetical protein				PF00092;PF25106	IPR002035 von Willebrand factor, type A;IPR036465 von Willebrand factor A-like domain superfamily	ENOG503BSQ9	S:(S) Function unknown
FUN_001817	FUN_001817-T2	mRNA	scaffold_2	11570789	11652962	-		hypothetical protein				PF00092;PF25106		ENOG503BSQ9	S:(S) Function unknown
FUN_001817	FUN_001817-T3	mRNA	scaffold_2	11570789	11652962	-		hypothetical protein				PF00092;PF25106	IPR002035 von Willebrand factor, type A;IPR036465 von Willebrand factor A-like domain superfamily	ENOG503BSQ9	S:(S) Function unknown
FUN_001817	FUN_001817-T4	mRNA	scaffold_2	11570789	11652962	-		hypothetical protein		2.7.11.1			IPR002035 von Willebrand factor, type A;IPR036465 von Willebrand factor A-like domain superfamily	ENOG502WMM8	S:(S) Function unknown
FUN_001817	FUN_001817-T5	mRNA	scaffold_2	11570789	11652962	-		hypothetical protein				PF00092;PF25106	IPR002035 von Willebrand factor, type A;IPR036465 von Willebrand factor A-like domain superfamily	ENOG503BSQ9	S:(S) Function unknown
FUN_001823	FUN_001823-T1	mRNA	scaffold_2	11730553	11732042	-		hypothetical protein				PF00092	IPR002035 von Willebrand factor, type A;IPR036465 von Willebrand factor A-like domain superfamily	ENOG503BSQ9	S:(S) Function unknown
FUN_001824	FUN_001824-T1	mRNA	scaffold_2	11742560	11745927	-		hypothetical protein				PF00092	IPR002035 von Willebrand factor, type A;IPR036465 von Willebrand factor A-like domain superfamily	ENOG503BSQ9	S:(S) Function unknown
FUN_001825	FUN_001825-T1	mRNA	scaffold_2	11761741	11763590	-		hypothetical protein				PF00092	IPR002035 von Willebrand factor, type A;IPR036465 von Willebrand factor A-like domain superfamily	ENOG503BSQ9	S:(S) Function unknown
FUN_001826	FUN_001826-T1	mRNA	scaffold_2	11763890	11766052	-		hypothetical protein					IPR036465 von Willebrand factor A-like domain superfamily	ENOG503BSQ9	S:(S) Function unknown
FUN_001827	FUN_001827-T1	mRNA	scaffold_2	11775886	11781647	-		hypothetical protein				PF00147	IPR000742 EGF-like domain;IPR002181 Fibrinogen, alpha/beta/gamma chain, C-terminal globular domain;IPR014716 Fibrinogen, alpha/beta/gamma chain, C-terminal globular, subdomain 1;IPR036056 Fibrinogen-like, C-terminal;IPR037579 Fibrinogen/angiopoietin-like	ENOG503BZD8	S:(S) Function unknown	GO_process: GO:0007596 - blood coagulation [Evidence IEA]
FUN_001833	FUN_001833-T1	mRNA	scaffold_2	11847547	11900183	+		hypothetical protein		4.6.1.2		PF00069;PF00211;PF07714	IPR000719 Protein kinase domain;IPR001054 Adenylyl cyclase class-3/4/guanylyl cyclase;IPR001245 Serine-threonine/tyrosine-protein kinase, catalytic domain;IPR011009 Protein kinase-like domain superfamily;IPR018297 Adenylyl cyclase class-4/guanylyl cyclase, conserved site;IPR029787 Nucleotide cyclase;IPR050401 Cyclic nucleotide synthase	ENOG503BF90	T:(T) Signal transduction mechanisms	GO_component: GO:0005886 - plasma membrane [Evidence IEA];GO_function: GO:0004383 - guanylate cyclase activity [Evidence IEA];GO_function: GO:0004672 - protein kinase activity [Evidence IEA];GO_function: GO:0005524 - ATP binding [Evidence IEA];GO_function: GO:0004016 - adenylate cyclase activity [Evidence IEA];GO_function: GO:0016849 - phosphorus-oxygen lyase activity [Evidence IEA];GO_function: …
FUN_001834	FUN_001834-T1	mRNA	scaffold_2	11916011	11923353	+		hypothetical protein		1.14.15.16			IPR001128 Cytochrome P450;IPR002401 Cytochrome P450, E-class, group I;IPR017972 Cytochrome P450, conserved site;IPR036396 Cytochrome P450 superfamily;IPR050479 Cytochrome P450, families 11 and 27	ENOG503B9J4	Q:(Q) Secondary metabolites biosynthesis, transport and catabolism	GO_function: GO:0020037 - heme binding [Evidence IEA];GO_function: GO:0016705 - oxidoreductase activity, acting on paired donors, with incorporation or reduction of molecular oxygen [Evidence IEA];GO_function: GO:0005506 - iron ion binding [Evidence IEA];GO_function: GO:0004497 - monooxygenase activity [Evidence IEA]
FUN_001835	FUN_001835-T1	mRNA	scaffold_2	11937966	11947998	+	RMI2_1	recQ-mediated genome instability protein 2				PF16100	IPR012340 Nucleic acid-binding, OB-fold;IPR032245 RecQ-mediated genome instability protein 2	ENOG503BRP5	S:(S) Function unknown	GO_component: GO:0005829 - cytosol [Evidence IEA];GO_component: GO:0016607 - nuclear speck [Evidence IEA];GO_process: GO:0043007 - maintenance of rDNA [Evidence IEA];GO_process: GO:0006281 - DNA repair [Evidence IEA];GO_process: GO:0033045 - regulation of sister chromatid segregation [Evidence IEA];GO_process: GO:2000042 - negative regulation of double-strand break repair via homologous recombina…
FUN_001836	FUN_001836-T1	mRNA	scaffold_2	12021678	12028369	+		hypothetical protein
FUN_001837	FUN_001837-T1	mRNA	scaffold_2	12061474	12070963	+	SLC1A3_1	Excitatory amino acid transporter 1					IPR001991 Sodium:dicarboxylate symporter;IPR036458 Sodium:dicarboxylate symporter superfamily;IPR050746 Dicarboxylate/Amino Acid:Cation Symporter	ENOG503BD67	E:(E) Amino acid transport and metabolism	GO_component: GO:0016020 - membrane [Evidence IEA];GO_component: GO:0005886 - plasma membrane [Evidence IEA];GO_function: GO:0015175 - neutral L-amino acid transmembrane transporter activity [Evidence IEA];GO_function: GO:0015501 - glutamate:sodium symporter activity [Evidence IEA];GO_function: GO:0005313 - L-glutamate transmembrane transporter activity [Evidence IEA];GO_function: GO:0015293 - sy…
FUN_001838	FUN_001838-T1	mRNA	scaffold_2	12106322	12115798	-	FAT1_1	long-chain fatty acid transporter fat1				PF00028	IPR002126 Cadherin-like;IPR015919 Cadherin-like superfamily;IPR020894 Cadherin conserved site;IPR039808 Cadherin	ENOG503C2BJ	T:(T) Signal transduction mechanisms	GO_component: GO:0016020 - membrane [Evidence IEA];GO_component: GO:0016342 - catenin complex [Evidence IEA];GO_component: GO:0005886 - plasma membrane [Evidence IEA];GO_function: GO:0005509 - calcium ion binding [Evidence IEA];GO_function: GO:0008013 - beta-catenin binding [Evidence IEA];GO_function: GO:0045296 - cadherin binding [Evidence IEA];GO_process: GO:0098742 - cell-cell adhesion via pla…
FUN_001841	FUN_001841-T1	mRNA	scaffold_2	12147267	12189846	+	PTGER4_1	Prostaglandin E2 receptor EP4 subtype				PF00001;PF10328	IPR000276 G protein-coupled receptor, rhodopsin-like;IPR001758 Prostanoid EP4 receptor;IPR008365 Prostanoid receptor;IPR017452 GPCR, rhodopsin-like, 7TM	ENOG503BHKU	T:(T) Signal transduction mechanisms	GO_component: GO:0016020 - membrane [Evidence IEA];GO_component: GO:0005886 - plasma membrane [Evidence IEA];GO_function: GO:0004957 - prostaglandin E receptor activity [Evidence IEA];GO_function: GO:0004930 - G protein-coupled receptor activity [Evidence IEA];GO_process: GO:0006954 - inflammatory response [Evidence IEA];GO_process: GO:0007186 - G protein-coupled receptor signaling pathway [Evide…
FUN_001842	FUN_001842-T1	mRNA	scaffold_2	12192252	12198124	-		hypothetical protein		3.4.15.1			IPR001548 Peptidase M2, peptidyl-dipeptidase A	ENOG503BB1P	O:(O) Posttranslational modification, protein turnover, chaperones	GO_component: GO:0016020 - membrane [Evidence IEA];GO_component: GO:0005886 - plasma membrane [Evidence IEA];GO_function: GO:0008237 - metallopeptidase activity [Evidence IEA];GO_function: GO:0008241 - peptidyl-dipeptidase activity [Evidence IEA];GO_process: GO:0006508 - proteolysis [Evidence IEA]			M02
FUN_001843	FUN_001843-T1	mRNA	scaffold_2	12225014	12235959	-		hypothetical protein
FUN_001848	FUN_001848-T1	mRNA	scaffold_2	12445982	12449657	-		hypothetical protein						ENOG503BPQI	S:(S) Function unknown
FUN_001854	FUN_001854-T1	mRNA	scaffold_2	12529530	12531834	+	PTGER4_2	Prostaglandin E2 receptor EP4 subtype				PF00001;PF10328	IPR000276 G protein-coupled receptor, rhodopsin-like;IPR001758 Prostanoid EP4 receptor;IPR008365 Prostanoid receptor;IPR017452 GPCR, rhodopsin-like, 7TM	ENOG503BHKU	T:(T) Signal transduction mechanisms	GO_component: GO:0016020 - membrane [Evidence IEA];GO_component: GO:0005886 - plasma membrane [Evidence IEA];GO_function: GO:0004957 - prostaglandin E receptor activity [Evidence IEA];GO_function: GO:0004930 - G protein-coupled receptor activity [Evidence IEA];GO_process: GO:0006954 - inflammatory response [Evidence IEA];GO_process: GO:0007186 - G protein-coupled receptor signaling pathway [Evide…
FUN_001859	FUN_001859-T1	mRNA	scaffold_2	12701914	12707342	-		hypothetical protein				PF00149	IPR004843 Calcineurin-like phosphoesterase domain, ApaH type;IPR029052 Metallo-dependent phosphatase-like;IPR050126 Diadenosine polyphosphate hydrolase	ENOG503BR0B	T:(T) Signal transduction mechanisms	GO_component: GO:0005737 - cytoplasm [Evidence IEA];GO_function: GO:0016787 - hydrolase activity [Evidence IEA];GO_function: GO:0000298 - endopolyphosphatase activity [Evidence IEA];GO_function: GO:0016791 - phosphatase activity [Evidence IEA];GO_process: GO:0006798 - polyphosphate catabolic process [Evidence IEA]
FUN_001860	FUN_001860-T1	mRNA	scaffold_2	12711570	12739749	+	CYP4B1_1	Cytochrome P450 4B1				PF00067	IPR001128 Cytochrome P450;IPR002401 Cytochrome P450, E-class, group I;IPR017972 Cytochrome P450, conserved site;IPR036396 Cytochrome P450 superfamily;IPR050196 Cytochrome P450 Monooxygenases	ENOG503B9GY	Q:(Q) Secondary metabolites biosynthesis, transport and catabolism	GO_function: GO:0020037 - heme binding [Evidence IEA];GO_function: GO:0016705 - oxidoreductase activity, acting on paired donors, with incorporation or reduction of molecular oxygen [Evidence IEA];GO_function: GO:0005506 - iron ion binding [Evidence IEA];GO_function: GO:0004497 - monooxygenase activity [Evidence IEA]
FUN_001861	FUN_001861-T1	mRNA	scaffold_2	12751945	12762146	-	SMARCB1_1	SWI SNF, matrix associated, actin dependent regulator of chromatin, sub b, member 1				PF04855;PF21459	IPR006939 SNF5/SMARCB1/INI1;IPR048664 SWI/SNF Subunit INI1, DNA binding domain	ENOG503BH6C	B:(B) Chromatin structure and dynamics;K:(K) Transcription	GO_component: GO:0000228 - nuclear chromosome [Evidence IEA];GO_process: GO:0006338 - chromatin remodeling [Evidence IEA]
FUN_001862	FUN_001862-T1	mRNA	scaffold_2	12769971	12787391	+		hypothetical protein		4.1.2.13		PF00274	IPR000741 Fructose-bisphosphate aldolase, class-I;IPR013785 Aldolase-type TIM barrel;IPR029768 Fructose-bisphosphate aldolase class-I active site	ENOG503BAP7	G:(G) Carbohydrate transport and metabolism	GO_function: GO:0004332 - fructose-bisphosphate aldolase activity [Evidence IEA];GO_process: GO:0006096 - glycolytic process [Evidence IEA]
FUN_001863	FUN_001863-T1	mRNA	scaffold_2	12788552	12805039	-	NWD2_1	NACHT and WD repeat domain-containing protein 2				PF05729;PF13191;PF13271;PF24883	IPR001680 WD40 repeat;IPR007111 NACHT nucleoside triphosphatase;IPR011047 Quinoprotein alcohol dehydrogenase-like superfamily;IPR015943 WD40/YVTN repeat-like-containing domain superfamily;IPR025139 Domain of unknown function DUF4062;IPR027417 P-loop containing nucleoside triphosphate hydrolase;IPR036322 WD40-repeat-containing domain superfamily;IPR052752 NACHT and WD repeat domain-containing prot…	ENOG503BA5T	B:(B) Chromatin structure and dynamics	GO_function: GO:0005515 - protein binding [Evidence IEA]
FUN_001866	FUN_001866-T1	mRNA	scaffold_2	12863808	12869219	+		hypothetical protein				PF02845	IPR000253 Forkhead-associated (FHA) domain;IPR003892 Ubiquitin system component CUE			GO_function: GO:0005515 - protein binding [Evidence IEA];GO_function: GO:0043130 - ubiquitin binding [Evidence IEA]
FUN_001867	FUN_001867-T1	mRNA	scaffold_2	12873987	12878608	-		hypothetical protein
FUN_001868	FUN_001868-T1	mRNA	scaffold_2	12880926	12895305	-		hypothetical protein					IPR017218 BLOC-2 complex, Hps6 subunit;IPR046822 BLOC-2 complex member HPS6, C-terminal domain			GO_component: GO:0031084 - BLOC-2 complex [Evidence IEA];GO_component: GO:0005765 - lysosomal membrane [Evidence IEA];GO_process: GO:0006996 - organelle organization [Evidence IEA];GO_process: GO:0072657 - protein localization to membrane [Evidence IEA];GO_process: GO:0032418 - lysosome localization [Evidence IEA]
FUN_001869	FUN_001869-T1	mRNA	scaffold_2	12895922	12920890	-	HPS6	GTP-dependent protein binding, variant 2					IPR017218 BLOC-2 complex, Hps6 subunit;IPR046823 BLOC-2 complex member HPS6, N-terminal domain	ENOG502QSBH	S:(S) Function unknown	GO_component: GO:0031084 - BLOC-2 complex [Evidence IEA];GO_component: GO:0005765 - lysosomal membrane [Evidence IEA];GO_process: GO:0006996 - organelle organization [Evidence IEA];GO_process: GO:0072657 - protein localization to membrane [Evidence IEA];GO_process: GO:0032418 - lysosome localization [Evidence IEA]
FUN_001869	FUN_001869-T2	mRNA	scaffold_2	12895922	12920890	-	HPS6	GTP-dependent protein binding					IPR017218 BLOC-2 complex, Hps6 subunit;IPR046823 BLOC-2 complex member HPS6, N-terminal domain	ENOG502QSBH	S:(S) Function unknown	GO_component: GO:0031084 - BLOC-2 complex [Evidence IEA];GO_component: GO:0005765 - lysosomal membrane [Evidence IEA];GO_process: GO:0006996 - organelle organization [Evidence IEA];GO_process: GO:0072657 - protein localization to membrane [Evidence IEA];GO_process: GO:0032418 - lysosome localization [Evidence IEA]
FUN_001870	FUN_001870-T1	mRNA	scaffold_2	12921936	12924681	+		hypothetical protein				PF15372	IPR028022 Protein of unknown function DUF4600
FUN_001871	FUN_001871-T1	mRNA	scaffold_2	12929991	12942336	-		hypothetical protein			6897at6447	PF15130	IPR027903 Protein of unknown function DUF4566	ENOG503B9D1	S:(S) Function unknown
FUN_001872	FUN_001872-T1	mRNA	scaffold_2	12946758	12953052	+		hypothetical protein
FUN_001873	FUN_001873-T1	mRNA	scaffold_2	12954989	12956499	+		hypothetical protein
FUN_001874	FUN_001874-T1	mRNA	scaffold_2	12958520	12959977	+		hypothetical protein
FUN_001875	FUN_001875-T1	mRNA	scaffold_2	12961667	12965152	+		hypothetical protein				PF09803	IPR018625 Protein Pet100	ENOG503BT5W	S:(S) Function unknown	GO_component: GO:0005743 - mitochondrial inner membrane [Evidence IEA];GO_component: GO:0005739 - mitochondrion [Evidence IEA];GO_function: GO:0051082 - unfolded protein binding [Evidence IEA];GO_process: GO:0033617 - mitochondrial cytochrome c oxidase assembly [Evidence IEA]
FUN_001877	FUN_001877-T1	mRNA	scaffold_2	12996595	13001526	+		hypothetical protein					IPR001752 Kinesin motor domain;IPR027417 P-loop containing nucleoside triphosphate hydrolase;IPR036961 Kinesin motor domain superfamily	ENOG503CPAA	Z:(Z) Cytoskeleton	GO_function: GO:0005524 - ATP binding [Evidence IEA];GO_function: GO:0008017 - microtubule binding [Evidence IEA];GO_function: GO:0003777 - microtubule motor activity [Evidence IEA];GO_process: GO:0007018 - microtubule-based movement [Evidence IEA]
FUN_001878	FUN_001878-T1	mRNA	scaffold_2	13013466	13036428	+		hypothetical protein			1020at6447	PF14739	IPR001752 Kinesin motor domain;IPR027417 P-loop containing nucleoside triphosphate hydrolase;IPR029329 Domain of unknown function DUF4472;IPR036961 Kinesin motor domain superfamily;IPR039873 Coiled-coil domain-containing protein 78	ENOG503CPAA	Z:(Z) Cytoskeleton	GO_component: GO:0005737 - cytoplasm [Evidence IEA];GO_function: GO:0005524 - ATP binding [Evidence IEA];GO_function: GO:0008017 - microtubule binding [Evidence IEA];GO_function: GO:0003777 - microtubule motor activity [Evidence IEA];GO_process: GO:0007018 - microtubule-based movement [Evidence IEA]
FUN_001879	FUN_001879-T1	mRNA	scaffold_2	13040205	13042407	-		hypothetical protein					IPR000276 G protein-coupled receptor, rhodopsin-like;IPR017452 GPCR, rhodopsin-like, 7TM;IPR050125 G-protein coupled receptor opsins	ENOG50KOG4219	S:(S) Function unknown	GO_component: GO:0016020 - membrane [Evidence IEA];GO_function: GO:0004930 - G protein-coupled receptor activity [Evidence IEA];GO_process: GO:0007186 - G protein-coupled receptor signaling pathway [Evidence IEA]
FUN_001880	FUN_001880-T1	mRNA	scaffold_2	13066736	13067898	-		hypothetical protein				PF00001	IPR000276 G protein-coupled receptor, rhodopsin-like;IPR017452 GPCR, rhodopsin-like, 7TM	ENOG503BPAN	T:(T) Signal transduction mechanisms	GO_component: GO:0016020 - membrane [Evidence IEA];GO_function: GO:0004930 - G protein-coupled receptor activity [Evidence IEA];GO_process: GO:0007186 - G protein-coupled receptor signaling pathway [Evidence IEA]
FUN_001882	FUN_001882-T1	mRNA	scaffold_2	13102597	13148358	+		hypothetical protein
FUN_001883	FUN_001883-T1	mRNA	scaffold_2	13179435	13228182	+		hypothetical protein				PF00010	IPR000014 PAS domain;IPR001067 Nuclear translocator;IPR011598 Myc-type, basic helix-loop-helix (bHLH) domain;IPR036638 Helix-loop-helix DNA-binding domain superfamily;IPR050933 Circadian Clock Transcription Factors	ENOG503B9NK	K:(K) Transcription	GO_component: GO:0005737 - cytoplasm [Evidence IEA];GO_component: GO:0005634 - nucleus [Evidence IEA];GO_component: GO:0005667 - transcription regulator complex [Evidence IEA];GO_function: GO:0046983 - protein dimerization activity [Evidence IEA];GO_function: GO:0003700 - DNA-binding transcription factor activity [Evidence IEA];GO_process: GO:0006355 - regulation of DNA-templated transcription [E…
FUN_001891	FUN_001891-T1	mRNA	scaffold_2	13372002	13394679	-		hypothetical protein			6753at6447	PF00560;PF13855	IPR001611 Leucine-rich repeat;IPR032675 Leucine-rich repeat domain superfamily;IPR050836 SDS22/Internalin LRR-containing	ENOG503BHKI	A:(A) RNA processing and modification	GO_function: GO:0005515 - protein binding [Evidence IEA]
FUN_001891	FUN_001891-T2	mRNA	scaffold_2	13372002	13394679	-		hypothetical protein			6753at6447	PF00560;PF13855	IPR001611 Leucine-rich repeat;IPR032675 Leucine-rich repeat domain superfamily;IPR050836 SDS22/Internalin LRR-containing	ENOG503BHKI	A:(A) RNA processing and modification	GO_function: GO:0005515 - protein binding [Evidence IEA]
FUN_001892	FUN_001892-T1	mRNA	scaffold_2	13395827	13684620	+		hypothetical protein			4951at6447	PF00400	IPR001680 WD40 repeat;IPR011047 Quinoprotein alcohol dehydrogenase-like superfamily;IPR015943 WD40/YVTN repeat-like-containing domain superfamily;IPR045260 Guanine nucleotide-exchange factor Sec12-like	ENOG503BERU	U:(U) Intracellular trafficking, secretion, and vesicular transport	GO_component: GO:0005789 - endoplasmic reticulum membrane [Evidence IEA];GO_function: GO:0005085 - guanyl-nucleotide exchange factor activity [Evidence IEA];GO_function: GO:0005515 - protein binding [Evidence IEA];GO_process: GO:0003400 - regulation of COPII vesicle coating [Evidence IEA];GO_process: GO:0006888 - endoplasmic reticulum to Golgi vesicle-mediated transport [Evidence IEA]
FUN_094757	FUN_094757-T1	mRNA	scaffold_2	13412101	13435510	-	CSPP1_4	positive regulation of cytokinesis, variant 2					IPR026708 Centrosome and spindle pole associated protein 1	ENOG503BK2F	S:(S) Function unknown	GO_component: GO:0005813 - centrosome [Evidence IEA];GO_component: GO:0005874 - microtubule [Evidence IEA];GO_component: GO:0000922 - spindle pole [Evidence IEA];GO_process: GO:0032467 - positive regulation of cytokinesis [Evidence IEA]
FUN_094757	FUN_094757-T2	mRNA	scaffold_2	13412101	13435510	-	CSPP1_4	positive regulation of cytokinesis				PF24578		ENOG503BK2F	S:(S) Function unknown
FUN_094758	FUN_094758-T1	mRNA	scaffold_2	13674980	13681108	-		hypothetical protein						ENOG503BHKI	A:(A) RNA processing and modification
FUN_001893	FUN_001893-T1	mRNA	scaffold_2	13688330	13699174	-		hypothetical protein
FUN_001896	FUN_001896-T1	mRNA	scaffold_2	13730348	13731676	-		hypothetical protein				PF05485	IPR006612 THAP-type zinc finger	ENOG503BUQB	S:(S) Function unknown
FUN_001899	FUN_001899-T1	mRNA	scaffold_2	13848446	13849818	+	GPRNPR2_1	7 transmembrane receptor (rhodopsin)					IPR000276 G protein-coupled receptor, rhodopsin-like;IPR017452 GPCR, rhodopsin-like, 7TM	ENOG503BP2D	S:(S) Function unknown	GO_component: GO:0016020 - membrane [Evidence IEA];GO_function: GO:0004930 - G protein-coupled receptor activity [Evidence IEA];GO_process: GO:0007186 - G protein-coupled receptor signaling pathway [Evidence IEA]
FUN_001905	FUN_001905-T1	mRNA	scaffold_2	13910595	13912985	-		hypothetical protein
FUN_001906	FUN_001906-T1	mRNA	scaffold_2	13913761	13913918	-		hypothetical protein				PF00058	IPR000033 LDLR class B repeat;IPR011042 Six-bladed beta-propeller, TolB-like
FUN_001907	FUN_001907-T1	mRNA	scaffold_2	13917324	13918578	-		hypothetical protein					IPR011042 Six-bladed beta-propeller, TolB-like;IPR050778 Cueball/EGF/LRP/Nidogen	ENOG503B9HR	T:(T) Signal transduction mechanisms
FUN_001911	FUN_001911-T1	mRNA	scaffold_2	14009999	14011021	-	HS3ST1	Heparan sulfate glucosamine 3-O-sulfotransferase 1		2.8.2.23		PF00685	IPR000863 Sulfotransferase domain;IPR027417 P-loop containing nucleoside triphosphate hydrolase;IPR037359 Heparan sulfate sulfotransferase	ENOG503BG0X	O:(O) Posttranslational modification, protein turnover, chaperones	GO_function: GO:0008146 - sulfotransferase activity [Evidence IEA];GO_function: GO:0008467 - [heparan sulfate]-glucosamine 3-sulfotransferase activity [Evidence IEA]
FUN_001912	FUN_001912-T1	mRNA	scaffold_2	14025945	14030370	-	HS3ST5_1	Heparan sulfate glucosamine 3-O-sulfotransferase 5		2.8.2.23		PF00685;PF13469	IPR000863 Sulfotransferase domain;IPR027417 P-loop containing nucleoside triphosphate hydrolase;IPR037359 Heparan sulfate sulfotransferase	ENOG503BK8P	O:(O) Posttranslational modification, protein turnover, chaperones	GO_function: GO:0008146 - sulfotransferase activity [Evidence IEA];GO_function: GO:0008467 - [heparan sulfate]-glucosamine 3-sulfotransferase activity [Evidence IEA]
FUN_001914	FUN_001914-T1	mRNA	scaffold_2	14050159	14053280	-		hypothetical protein
FUN_001915	FUN_001915-T1	mRNA	scaffold_2	14065208	14077942	-	RDH5_1	Retinol dehydrogenase 5					IPR000033 LDLR class B repeat;IPR011042 Six-bladed beta-propeller, TolB-like;IPR050778 Cueball/EGF/LRP/Nidogen	ENOG503BA6X	Q:(Q) Secondary metabolites biosynthesis, transport and catabolism
FUN_001916	FUN_001916-T1	mRNA	scaffold_2	14099955	14104453	-	CDHR1_1	Cadherin-related member 1						ENOG503BBKM	S:(S) Function unknown
FUN_001918	FUN_001918-T1	mRNA	scaffold_2	14145131	14146213	-	HS3ST5_2	Heparan sulfate glucosamine 3-O-sulfotransferase 5		2.8.2.23		PF00685;PF13469	IPR000863 Sulfotransferase domain;IPR027417 P-loop containing nucleoside triphosphate hydrolase;IPR037359 Heparan sulfate sulfotransferase	ENOG503BK8P	O:(O) Posttranslational modification, protein turnover, chaperones	GO_function: GO:0008146 - sulfotransferase activity [Evidence IEA];GO_function: GO:0008467 - [heparan sulfate]-glucosamine 3-sulfotransferase activity [Evidence IEA]
FUN_001923	FUN_001923-T1	mRNA	scaffold_2	14267003	14267334	-		hypothetical protein
FUN_001932	FUN_001932-T1	mRNA	scaffold_2	14491816	14494119	+		hypothetical protein
FUN_001933	FUN_001933-T1	mRNA	scaffold_2	14494508	14496134	+		hypothetical protein
FUN_001935	FUN_001935-T1	mRNA	scaffold_2	14573565	14579272	-		hypothetical protein				PF17771	IPR041645 ADAMTS, cysteine-rich domain 2	ENOG50KOG3538	O:(O) Posttranslational modification, protein turnover, chaperones
FUN_001940	FUN_001940-T1	mRNA	scaffold_2	14607862	14609259	-		hypothetical protein
FUN_001941	FUN_001941-T1	mRNA	scaffold_2	14609429	14611870	+		hypothetical protein
FUN_001942	FUN_001942-T1	mRNA	scaffold_2	14611906	14613172	+		hypothetical protein
FUN_001943	FUN_001943-T1	mRNA	scaffold_2	14618280	14620892	-		hypothetical protein
FUN_001944	FUN_001944-T1	mRNA	scaffold_2	14621241	14627783	+	GRIA2_1	Glutamate receptor 2				PF00060;PF00497;PF10613	IPR001320 Ionotropic glutamate receptor, C-terminal;IPR001508 Ionotropic glutamate receptor, metazoa;IPR015683 Ionotropic glutamate receptor;IPR019594 Ionotropic glutamate receptor, L-glutamate and glycine-binding domain	ENOG503CNZE	P:(P) Inorganic ion transport and metabolism	GO_component: GO:0016020 - membrane [Evidence IEA];GO_function: GO:0005216 - monoatomic ion channel activity [Evidence IEA];GO_function: GO:0038023 - signaling receptor activity [Evidence IEA];GO_function: GO:0015276 - ligand-gated monoatomic ion channel activity [Evidence IEA];GO_process: GO:0006811 - monoatomic ion transport [Evidence IEA]
FUN_001945	FUN_001945-T1	mRNA	scaffold_2	14629961	14630772	+		hypothetical protein
FUN_001948	FUN_001948-T1	mRNA	scaffold_2	14638056	14640156	+	GRIA2_2	Glutamate receptor 2				PF00060;PF00497;PF10613	IPR001320 Ionotropic glutamate receptor, C-terminal;IPR001508 Ionotropic glutamate receptor, metazoa;IPR015683 Ionotropic glutamate receptor;IPR019594 Ionotropic glutamate receptor, L-glutamate and glycine-binding domain	ENOG503CNZE	P:(P) Inorganic ion transport and metabolism	GO_component: GO:0016020 - membrane [Evidence IEA];GO_function: GO:0005216 - monoatomic ion channel activity [Evidence IEA];GO_function: GO:0038023 - signaling receptor activity [Evidence IEA];GO_function: GO:0015276 - ligand-gated monoatomic ion channel activity [Evidence IEA];GO_process: GO:0006811 - monoatomic ion transport [Evidence IEA]
FUN_001949	FUN_001949-T1	mRNA	scaffold_2	14644677	14652281	+		hypothetical protein				PF00060;PF00497;PF10613	IPR001320 Ionotropic glutamate receptor, C-terminal;IPR001508 Ionotropic glutamate receptor, metazoa;IPR015683 Ionotropic glutamate receptor;IPR019594 Ionotropic glutamate receptor, L-glutamate and glycine-binding domain	ENOG503BIK1	E:(E) Amino acid transport and metabolism;P:(P) Inorganic ion transport and metabolism;T:(T) Signal transduction mechanisms	GO_component: GO:0016020 - membrane [Evidence IEA];GO_function: GO:0005216 - monoatomic ion channel activity [Evidence IEA];GO_function: GO:0038023 - signaling receptor activity [Evidence IEA];GO_function: GO:0015276 - ligand-gated monoatomic ion channel activity [Evidence IEA];GO_process: GO:0006811 - monoatomic ion transport [Evidence IEA]
FUN_001950	FUN_001950-T1	mRNA	scaffold_2	14687170	14701278	-		hypothetical protein				PF05253	IPR022776 TRM13/UPF0224 family, U11-48K-like CHHC zinc finger domain;IPR036236 Zinc finger C2H2 superfamily;IPR051591 UPF0224 (FAM112) RNA Processing	ENOG503BUHZ	S:(S) Function unknown
FUN_001953	FUN_001953-T1	mRNA	scaffold_2	14708923	14774515	+		hypothetical protein				PF00822;PF13903	IPR004031 PMP-22/EMP/MP20/Claudin	ENOG503BNMP	S:(S) Function unknown	GO_component: GO:0016020 - membrane [Evidence IEA]
FUN_001951	FUN_001951-T1	mRNA	scaffold_2	14738898	14743087	+		hypothetical protein
FUN_001954	FUN_001954-T1	mRNA	scaffold_2	14781391	14784822	+		hypothetical protein					IPR036273 CRAL/TRIO, N-terminal domain superfamily	ENOG503BI8Q	I:(I) Lipid transport and metabolism
FUN_001956	FUN_001956-T1	mRNA	scaffold_2	14799173	14821464	+	TUBE1_1	Tubulin epsilon chain			2095at6447	PF00091;PF03953	IPR000217 Tubulin;IPR003008 Tubulin/FtsZ, GTPase domain;IPR004057 Epsilon tubulin;IPR008280 Tubulin/FtsZ, C-terminal;IPR017975 Tubulin, conserved site;IPR018316 Tubulin/FtsZ, 2-layer sandwich domain;IPR023123 Tubulin, C-terminal;IPR036525 Tubulin/FtsZ, GTPase domain superfamily	ENOG503BFQA	Z:(Z) Cytoskeleton	GO_component: GO:0005874 - microtubule [Evidence IEA];GO_function: GO:0005525 - GTP binding [Evidence IEA];GO_process: GO:0007017 - microtubule-based process [Evidence IEA]
FUN_001956	FUN_001956-T2	mRNA	scaffold_2	14799173	14821464	+	TUBE1_1	Tubulin epsilon chain, variant 2			2095at6447	PF00091;PF03953	IPR000217 Tubulin;IPR003008 Tubulin/FtsZ, GTPase domain;IPR004057 Epsilon tubulin;IPR008280 Tubulin/FtsZ, C-terminal;IPR017975 Tubulin, conserved site;IPR018316 Tubulin/FtsZ, 2-layer sandwich domain;IPR023123 Tubulin, C-terminal;IPR036525 Tubulin/FtsZ, GTPase domain superfamily	ENOG503BFQA	Z:(Z) Cytoskeleton	GO_component: GO:0005874 - microtubule [Evidence IEA];GO_function: GO:0005525 - GTP binding [Evidence IEA];GO_process: GO:0007017 - microtubule-based process [Evidence IEA]
FUN_001960	FUN_001960-T1	mRNA	scaffold_2	14917568	14919565	+		hypothetical protein		3.11.1.1	6403at6447		IPR006323 Phosphonoacetaldehyde hydrolase;IPR023198 Phosphoglycolate phosphatase-like, domain 2;IPR023214 HAD superfamily;IPR036412 HAD-like superfamily;IPR050155 HAD-like hydrolase superfamily	ENOG503BF9K	S:(S) Function unknown	GO_component: GO:0005829 - cytosol [Evidence IEA];GO_function: GO:0050194 - phosphonoacetaldehyde hydrolase activity [Evidence IEA];GO_function: GO:0008967 - phosphoglycolate phosphatase activity [Evidence IEA];GO_process: GO:0006281 - DNA repair [Evidence IEA];GO_process: GO:0019700 - organic phosphonate catabolic process [Evidence IEA];GO_process: GO:0016311 - dephosphorylation [Evidence IEA]
FUN_001965	FUN_001965-T1	mRNA	scaffold_2	15032953	15033116	+		hypothetical protein
FUN_001967	FUN_001967-T1	mRNA	scaffold_2	15040352	15041532	-		hypothetical protein		3.6.1.59		PF11969	IPR008594 Scavenger mRNA decapping enzyme DcpS/DCS2;IPR036265 HIT-like superfamily	ENOG503BJYT	E:(E) Amino acid transport and metabolism	GO_component: GO:0005634 - nucleus [Evidence IEA];GO_component: GO:0000932 - P-body [Evidence IEA];GO_function: GO:0000340 - RNA 7-methylguanosine cap binding [Evidence IEA];GO_function: GO:0016787 - hydrolase activity [Evidence IEA];GO_function: GO:0050072 - obsolete m7G(5')pppN diphosphatase activity [Evidence IEA];GO_process: GO:0000290 - deadenylation-dependent decapping of nuclear-transcribe…
FUN_001969	FUN_001969-T1	mRNA	scaffold_2	15068820	15074469	+		hypothetical protein
FUN_001970	FUN_001970-T1	mRNA	scaffold_2	15077555	15081527	-	MYL9_1	Myosin regulatory light polypeptide 9			8097at6447	PF00036;PF13202;PF13405;PF13499	IPR002048 EF-hand domain;IPR011992 EF-hand domain pair;IPR018247 EF-Hand 1, calcium-binding site;IPR050403 Myosin regulatory light chain	ENOG503BDPG	T:(T) Signal transduction mechanisms	GO_function: GO:0005509 - calcium ion binding [Evidence IEA]
FUN_001971	FUN_001971-T1	mRNA	scaffold_2	15087742	15215151	+	MED23_1	Mediator of RNA polymerase II transcription subunit 23					IPR021629 Mediator complex, subunit Med23	ENOG503BD4U	K:(K) Transcription	GO_component: GO:0005667 - transcription regulator complex [Evidence IEA];GO_component: GO:0016592 - mediator complex [Evidence IEA];GO_process: GO:0010628 - positive regulation of gene expression [Evidence IEA];GO_process: GO:0006357 - regulation of transcription by RNA polymerase II [Evidence IEA]
FUN_094759	FUN_094759-T1	mRNA	scaffold_2	15162668	15168650	+		hypothetical protein
FUN_001972	FUN_001972-T1	mRNA	scaffold_2	15215160	15225240	+	MED23_2	Mediator of RNA polymerase II transcription subunit 23					IPR021629 Mediator complex, subunit Med23	ENOG503BD4U	K:(K) Transcription	GO_component: GO:0005667 - transcription regulator complex [Evidence IEA];GO_component: GO:0016592 - mediator complex [Evidence IEA];GO_process: GO:0010628 - positive regulation of gene expression [Evidence IEA];GO_process: GO:0006357 - regulation of transcription by RNA polymerase II [Evidence IEA]
FUN_001973	FUN_001973-T1	mRNA	scaffold_2	15227068	15247724	+	MED23_3	Mediator of RNA polymerase II transcription subunit 23					IPR021629 Mediator complex, subunit Med23	ENOG503BD4U	K:(K) Transcription	GO_component: GO:0005667 - transcription regulator complex [Evidence IEA];GO_component: GO:0016592 - mediator complex [Evidence IEA];GO_process: GO:0010628 - positive regulation of gene expression [Evidence IEA];GO_process: GO:0006357 - regulation of transcription by RNA polymerase II [Evidence IEA]
FUN_001974	FUN_001974-T1	mRNA	scaffold_2	15293051	15299085	-		hypothetical protein
FUN_001975	FUN_001975-T1	mRNA	scaffold_2	15299253	15301893	-		hypothetical protein
FUN_001977	FUN_001977-T1	mRNA	scaffold_2	15324489	15417753	+	PDE7A	High affinity cAMP-specific 3',5'-cyclic phosphodiesterase 7A		3.1.4.53				ENOG503BBX7	T:(T) Signal transduction mechanisms
FUN_001977	FUN_001977-T2	mRNA	scaffold_2	15324489	15417753	+	PDE7A	High affinity cAMP-specific 3',5'-cyclic phosphodiesterase 7A, variant 2		3.1.4.53				ENOG503BBX7	T:(T) Signal transduction mechanisms
FUN_001980	FUN_001980-T1	mRNA	scaffold_2	15491174	15508057	-	MTFR1	mitochondrial fission				PF05308	IPR007972 Mitochondrial fission regulator 1	ENOG503BENG	S:(S) Function unknown	GO_component: GO:0005739 - mitochondrion [Evidence IEA];GO_process: GO:0009060 - aerobic respiration [Evidence IEA];GO_process: GO:0000266 - mitochondrial fission [Evidence IEA]
FUN_001981	FUN_001981-T1	mRNA	scaffold_2	15509648	15515112	+	ARMC1_1	Armadillo repeat-containing protein 1			8077at6447		IPR011989 Armadillo-like helical;IPR016024 Armadillo-type fold;IPR016617 Armadillo repeat-containing protein 1	ENOG503BF6X	S:(S) Function unknown
FUN_001982	FUN_001982-T1	mRNA	scaffold_2	15544165	15548934	-		hypothetical protein
FUN_001984	FUN_001984-T1	mRNA	scaffold_2	15552260	15565132	-	TOLL6_1	Toll6p				PF01582;PF13676	IPR000157 Toll/interleukin-1 receptor homology (TIR) domain;IPR035897 Toll/interleukin-1 receptor homology (TIR) domain superfamily	ENOG503BIA8	T:(T) Signal transduction mechanisms	GO_component: GO:0005886 - plasma membrane [Evidence IEA];GO_function: GO:0038023 - signaling receptor activity [Evidence IEA];GO_process: GO:0007165 - signal transduction [Evidence IEA]
FUN_001986	FUN_001986-T1	mRNA	scaffold_2	15575622	15577225	-		hypothetical protein						ENOG503BQ14	S:(S) Function unknown
FUN_001989	FUN_001989-T1	mRNA	scaffold_2	15611145	15611678	+	TOLL6_2	Toll6p				PF01582;PF13676	IPR000157 Toll/interleukin-1 receptor homology (TIR) domain;IPR035897 Toll/interleukin-1 receptor homology (TIR) domain superfamily	ENOG503BIA8	T:(T) Signal transduction mechanisms	GO_component: GO:0005886 - plasma membrane [Evidence IEA];GO_function: GO:0038023 - signaling receptor activity [Evidence IEA];GO_process: GO:0007165 - signal transduction [Evidence IEA]
FUN_001992	FUN_001992-T1	mRNA	scaffold_2	15661817	15669249	+		hypothetical protein
FUN_001995	FUN_001995-T1	mRNA	scaffold_2	15693898	15703354	+	PDE7B_2	cAMP-specific 3',5'-cyclic phosphodiesterase 7B		3.1.4.53			IPR002073 3'5'-cyclic nucleotide phosphodiesterase, catalytic domain;IPR036971 3'5'-cyclic nucleotide phosphodiesterase, catalytic domain superfamily	ENOG503BBX7	T:(T) Signal transduction mechanisms	GO_function: GO:0004114 - 3',5'-cyclic-nucleotide phosphodiesterase activity [Evidence IEA];GO_process: GO:0007165 - signal transduction [Evidence IEA]
FUN_001998	FUN_001998-T1	mRNA	scaffold_2	15715977	15723931	+	ARMC1_2	Armadillo repeat-containing protein 1, variant 2			8077at6447		IPR011989 Armadillo-like helical;IPR016024 Armadillo-type fold;IPR016617 Armadillo repeat-containing protein 1	ENOG503BF6X	S:(S) Function unknown
FUN_001998	FUN_001998-T2	mRNA	scaffold_2	15715977	15723931	+	ARMC1_2	Armadillo repeat-containing protein 1			8077at6447		IPR011989 Armadillo-like helical;IPR016024 Armadillo-type fold;IPR016617 Armadillo repeat-containing protein 1	ENOG503BF6X	S:(S) Function unknown
FUN_001999	FUN_001999-T1	mRNA	scaffold_2	15737599	15740777	-		hypothetical protein
FUN_002000	FUN_002000-T1	mRNA	scaffold_2	15779150	15780015	-		hypothetical protein
FUN_002001	FUN_002001-T1	mRNA	scaffold_2	15782324	15782887	-		hypothetical protein
FUN_002002	FUN_002002-T1	mRNA	scaffold_2	15836165	15836770	-		hypothetical protein
FUN_002003	FUN_002003-T1	mRNA	scaffold_2	15839079	15839642	-		hypothetical protein
FUN_002005	FUN_002005-T1	mRNA	scaffold_2	15902902	15903219	-		hypothetical protein
FUN_002006	FUN_002006-T1	mRNA	scaffold_2	15908008	15908332	-		hypothetical protein
FUN_002007	FUN_002007-T1	mRNA	scaffold_2	15908853	15910285	-		hypothetical protein
FUN_002009	FUN_002009-T1	mRNA	scaffold_2	15933695	15935766	+		hypothetical protein
FUN_002010	FUN_002010-T1	mRNA	scaffold_2	15949621	15976078	-		hypothetical protein						ENOG50KOG1217	O:(O) Posttranslational modification, protein turnover, chaperones
FUN_002011	FUN_002011-T1	mRNA	scaffold_2	15977240	15996876	-		hypothetical protein				PF00008;PF01414;PF12661	IPR000152 EGF-type aspartate/asparagine hydroxylation site;IPR000742 EGF-like domain;IPR001774 Delta/Serrate/lag-2 (DSL) protein;IPR001881 EGF-like calcium-binding domain;IPR051022 Notch Signaling and Cell Fate Determination	ENOG503BA2W	T:(T) Signal transduction mechanisms	GO_component: GO:0016020 - membrane [Evidence IEA];GO_component: GO:0005886 - plasma membrane [Evidence IEA];GO_component: GO:0032991 - protein-containing complex [Evidence IEA];GO_function: GO:0005509 - calcium ion binding [Evidence IEA];GO_process: GO:0007157 - heterophilic cell-cell adhesion via plasma membrane cell adhesion molecules [Evidence IEA];GO_process: GO:0045197 - establishment or ma…
FUN_002012	FUN_002012-T1	mRNA	scaffold_2	16003306	16049271	-		hypothetical protein
FUN_002013	FUN_002013-T1	mRNA	scaffold_2	16055591	16064291	-		hypothetical protein
FUN_002016	FUN_002016-T1	mRNA	scaffold_2	16081556	16090565	-		hypothetical protein				PF00008;PF01414;PF12661	IPR000152 EGF-type aspartate/asparagine hydroxylation site;IPR000742 EGF-like domain;IPR001774 Delta/Serrate/lag-2 (DSL) protein;IPR001881 EGF-like calcium-binding domain;IPR013032 EGF-like, conserved site	ENOG503BGFY	T:(T) Signal transduction mechanisms	GO_component: GO:0016020 - membrane [Evidence IEA];GO_function: GO:0005509 - calcium ion binding [Evidence IEA];GO_process: GO:0007154 - cell communication [Evidence IEA]
FUN_002018	FUN_002018-T1	mRNA	scaffold_2	16149636	16150031	-		hypothetical protein				PF00147	IPR002181 Fibrinogen, alpha/beta/gamma chain, C-terminal globular domain;IPR014716 Fibrinogen, alpha/beta/gamma chain, C-terminal globular, subdomain 1;IPR036056 Fibrinogen-like, C-terminal;IPR050373 Fibrinogen C-terminal domain-containing protein	ENOG503BHN9	S:(S) Function unknown	GO_component: GO:0005615 - extracellular space [Evidence IEA];GO_component: GO:0062023 - collagen-containing extracellular matrix [Evidence IEA]
FUN_002020	FUN_002020-T1	mRNA	scaffold_2	16173572	16183042	+	DLL1_1	Dll1p				PF01414;PF07657	IPR001774 Delta/Serrate/lag-2 (DSL) protein;IPR011651 Notch ligand, N-terminal domain	ENOG503BEE5	T:(T) Signal transduction mechanisms	GO_component: GO:0016020 - membrane [Evidence IEA];GO_process: GO:0007219 - Notch signaling pathway [Evidence IEA];GO_process: GO:0007154 - cell communication [Evidence IEA];GO_process: GO:0007275 - multicellular organism development [Evidence IEA]
FUN_002021	FUN_002021-T1	mRNA	scaffold_2	16192079	16193015	-		hypothetical protein						ENOG503BJ93	B:(B) Chromatin structure and dynamics
FUN_002023	FUN_002023-T1	mRNA	scaffold_2	16201306	16218684	-	DLL1_2	Delta-like				PF01414	IPR001774 Delta/Serrate/lag-2 (DSL) protein	ENOG503BEE5	T:(T) Signal transduction mechanisms	GO_component: GO:0016020 - membrane [Evidence IEA];GO_process: GO:0007154 - cell communication [Evidence IEA]
FUN_002024	FUN_002024-T1	mRNA	scaffold_2	16219037	16225420	-		hypothetical protein
FUN_002026	FUN_002026-T1	mRNA	scaffold_2	16297825	16304007	-		hypothetical protein				PF00536;PF00628;PF07647	IPR001660 Sterile alpha motif domain;IPR001965 Zinc finger, PHD-type;IPR011011 Zinc finger, FYVE/PHD-type;IPR013083 Zinc finger, RING/FYVE/PHD-type;IPR013761 Sterile alpha motif/pointed domain superfamily;IPR019787 Zinc finger, PHD-finger;IPR050548 Polycomb group and chromatin remodeling factors	ENOG503BJ93	B:(B) Chromatin structure and dynamics	GO_component: GO:0005634 - nucleus [Evidence IEA];GO_function: GO:0005515 - protein binding [Evidence IEA];GO_function: GO:0042393 - histone binding [Evidence IEA];GO_function: GO:0003682 - chromatin binding [Evidence IEA];GO_process: GO:0045892 - negative regulation of DNA-templated transcription [Evidence IEA]
FUN_002027	FUN_002027-T1	mRNA	scaffold_2	16311646	16338949	-		hypothetical protein				PF21524	IPR005818 Linker histone H1/H5, domain H15;IPR048589 SAM domain-containing protein 1-like, WH domain	ENOG503BJ93	B:(B) Chromatin structure and dynamics	GO_component: GO:0000786 - nucleosome [Evidence IEA];GO_function: GO:0003677 - DNA binding [Evidence IEA];GO_process: GO:0006334 - nucleosome assembly [Evidence IEA]
FUN_002030	FUN_002030-T1	mRNA	scaffold_2	16365643	16429753	+	CRISP2_1	Cysteine-rich secretory protein 2				PF00188;PF01549	IPR001283 Cysteine-rich secretory protein-related;IPR003582 ShKT domain;IPR014044 CAP domain;IPR035940 CAP superfamily	ENOG503BI47	S:(S) Function unknown
FUN_002030	FUN_002030-T2	mRNA	scaffold_2	16365643	16429753	+	CRISP2_1	Cysteine-rich secretory protein 2, variant 2				PF00188;PF01549	IPR001283 Cysteine-rich secretory protein-related;IPR003582 ShKT domain;IPR014044 CAP domain;IPR035940 CAP superfamily	ENOG503BI47	S:(S) Function unknown
FUN_002032	FUN_002032-T1	mRNA	scaffold_2	16437235	16449007	+		hypothetical protein				PF00188	IPR001283 Cysteine-rich secretory protein-related;IPR014044 CAP domain;IPR018244 Allergen V5/Tpx-1-related, conserved site;IPR035940 CAP superfamily	ENOG503NZQD	S:(S) Function unknown	GO_component: GO:0005576 - extracellular region [Evidence IEA]
FUN_002036	FUN_002036-T1	mRNA	scaffold_2	16453186	16465878	+		hypothetical protein				PF00188	IPR001283 Cysteine-rich secretory protein-related;IPR014044 CAP domain;IPR035940 CAP superfamily	ENOG503NZQD	S:(S) Function unknown
FUN_002037	FUN_002037-T1	mRNA	scaffold_2	16473378	16485800	-		hypothetical protein		1.3.1.22				ENOG503BRXJ	I:(I) Lipid transport and metabolism
FUN_002037	FUN_002037-T2	mRNA	scaffold_2	16473378	16485800	-		hypothetical protein		1.3.1.22				ENOG503BRXJ	I:(I) Lipid transport and metabolism
FUN_002038	FUN_002038-T1	mRNA	scaffold_2	16480819	16483346	+		hypothetical protein						ENOG503Q1E8
FUN_002054	FUN_002054-T1	mRNA	scaffold_2	16727176	16729038	-		hypothetical protein
FUN_002062	FUN_002062-T1	mRNA	scaffold_2	16862176	17049021	+		hypothetical protein		3.1.3.48		PF00041;PF00047;PF00102;PF07679;PF13895;PF13927;PF16656;PF23144	IPR000242 Tyrosine-specific protein phosphatase, PTPase domain;IPR000387 Tyrosine-specific protein phosphatases domain;IPR003595 Protein-tyrosine phosphatase, catalytic;IPR003598 Immunoglobulin subtype 2;IPR003599 Immunoglobulin domain subtype;IPR003961 Fibronectin type III;IPR007110 Immunoglobulin-like domain;IPR013098 Immunoglobulin I-set;IPR013783 Immunoglobulin-like fold;IPR016130 Protein-tyr…	ENOG503BA83	T:(T) Signal transduction mechanisms	GO_function: GO:0005515 - protein binding [Evidence IEA];GO_function: GO:0004725 - protein tyrosine phosphatase activity [Evidence IEA];GO_process: GO:0016311 - dephosphorylation [Evidence IEA];GO_process: GO:0006470 - protein dephosphorylation [Evidence IEA]
FUN_002063	FUN_002063-T1	mRNA	scaffold_2	17066419	17066817	+		hypothetical protein
FUN_002064	FUN_002064-T1	mRNA	scaffold_2	17067192	17075821	+		hypothetical protein					IPR001024 PLAT/LH2 domain;IPR036392 PLAT/LH2 domain superfamily			GO_function: GO:0005515 - protein binding [Evidence IEA]
FUN_002065	FUN_002065-T1	mRNA	scaffold_2	17077465	17080249	-		hypothetical protein
FUN_002066	FUN_002066-T1	mRNA	scaffold_2	17089131	17337404	+		hypothetical protein			6428at6447	PF02126	IPR001559 Phosphotriesterase;IPR032466 Metal-dependent hydrolase	ENOG503BGDX	S:(S) Function unknown	GO_function: GO:0008270 - zinc ion binding [Evidence IEA];GO_process: GO:0009056 - catabolic process [Evidence IEA]
FUN_002068	FUN_002068-T1	mRNA	scaffold_2	17101105	17396301	-	DHRS11_2	Dehydrogenase/reductase SDR member 11		1.1.1.216		PF00106;PF08659;PF13561	IPR002347 Short-chain dehydrogenase/reductase SDR;IPR020904 Short-chain dehydrogenase/reductase, conserved site;IPR036291 NAD(P)-binding domain superfamily	ENOG503BJDJ	Q:(Q) Secondary metabolites biosynthesis, transport and catabolism	GO_function: GO:0016491 - oxidoreductase activity [Evidence IEA]
FUN_002067	FUN_002067-T1	mRNA	scaffold_2	17369933	17384212	-	DHRS11_1	Dehydrogenase/reductase SDR member 11		1.1.1.216			IPR002347 Short-chain dehydrogenase/reductase SDR;IPR020904 Short-chain dehydrogenase/reductase, conserved site;IPR036291 NAD(P)-binding domain superfamily	ENOG503BJDJ	Q:(Q) Secondary metabolites biosynthesis, transport and catabolism	GO_function: GO:0016491 - oxidoreductase activity [Evidence IEA]
FUN_002069	FUN_002069-T1	mRNA	scaffold_2	17409637	17427389	-	SGK3	Serine/threonine-protein kinase Sgk3		2.7.11.1		PF00069	IPR000719 Protein kinase domain;IPR008271 Serine/threonine-protein kinase, active site;IPR011009 Protein kinase-like domain superfamily	ENOG503B9HI	T:(T) Signal transduction mechanisms	GO_function: GO:0005524 - ATP binding [Evidence IEA];GO_function: GO:0004672 - protein kinase activity [Evidence IEA];GO_process: GO:0006468 - protein phosphorylation [Evidence IEA]
FUN_002070	FUN_002070-T1	mRNA	scaffold_2	17427521	17545728	-	SGK1	Serine/threonine-protein kinase Sgk1		2.7.11.1		PF00787	IPR001683 Phox homology;IPR036871 PX domain superfamily	ENOG503B9HI	T:(T) Signal transduction mechanisms	GO_component: GO:0043231 - intracellular membrane-bounded organelle [Evidence IEA];GO_function: GO:0035091 - phosphatidylinositol binding [Evidence IEA]
FUN_002073	FUN_002073-T1	mRNA	scaffold_2	17555748	17560647	+	IFT52_1	Intraflagellar transport protein 52				PF23355	IPR039975 Intraflagellar transport protein 52 homolog;IPR055458 IFT52, GIFT domain	ENOG503BF0V	W:(W) Extracellular structures	GO_component: GO:0030992 - intraciliary transport particle B [Evidence IEA];GO_component: GO:0005929 - cilium [Evidence IEA];GO_component: GO:0005814 - centriole [Evidence IEA];GO_process: GO:0060271 - cilium assembly [Evidence IEA];GO_process: GO:0042073 - intraciliary transport [Evidence IEA]
FUN_002074	FUN_002074-T1	mRNA	scaffold_2	17562984	17575291	+	IFT52_2	Intraflagellar transport protein 52				PF21178;PF23352	IPR039975 Intraflagellar transport protein 52 homolog;IPR048643 Intraflagellar transport protein 52, C-terminal domain;IPR055458 IFT52, GIFT domain;IPR055460 IFT52, central domain	ENOG503BF0V	W:(W) Extracellular structures	GO_component: GO:0030992 - intraciliary transport particle B [Evidence IEA];GO_component: GO:0005929 - cilium [Evidence IEA];GO_component: GO:0005814 - centriole [Evidence IEA];GO_process: GO:0060271 - cilium assembly [Evidence IEA];GO_process: GO:0042073 - intraciliary transport [Evidence IEA]
FUN_002075	FUN_002075-T1	mRNA	scaffold_2	17589371	17589831	-		hypothetical protein
FUN_002079	FUN_002079-T1	mRNA	scaffold_2	17611130	17872374	-		hypothetical protein
FUN_002089	FUN_002089-T1	mRNA	scaffold_2	18013905	18014935	+		hypothetical protein
FUN_002098	FUN_002098-T1	mRNA	scaffold_2	18215591	18227080	+		hypothetical protein				PF14854	IPR039499 Leucine rich adaptor protein 1/25
FUN_002105	FUN_002105-T1	mRNA	scaffold_2	18294904	18301264	+		hypothetical protein
FUN_002109	FUN_002109-T1	mRNA	scaffold_2	18324245	18334763	-		hypothetical protein				PF14854	IPR039499 Leucine rich adaptor protein 1/25
FUN_002111	FUN_002111-T1	mRNA	scaffold_2	18403061	18406690	-		hypothetical protein				PF14815	IPR015797 NUDIX hydrolase-like domain superfamily;IPR029119 Adenine DNA glycosylase, C-terminal;IPR044298 Adenine/Thymine-DNA glycosylase	ENOG503BJKG	L:(L) Replication, recombination and repair	GO_component: GO:0005634 - nucleus [Evidence IEA];GO_function: GO:0035485 - adenine/guanine mispair binding [Evidence IEA];GO_function: GO:0016798 - hydrolase activity, acting on glycosyl bonds [Evidence IEA];GO_function: GO:0034039 - 8-oxo-7,8-dihydroguanine DNA N-glycosylase activity [Evidence IEA];GO_function: GO:0032357 - oxidized purine DNA binding [Evidence IEA];GO_function: GO:0000701 - pu…
FUN_002112	FUN_002112-T1	mRNA	scaffold_2	18407178	18423988	-		hypothetical protein				PF00633;PF00730	IPR000445 Helix-hairpin-helix motif;IPR003265 HhH-GPD domain;IPR004036 Endonuclease III-like, conserved site-2;IPR011257 DNA glycosylase;IPR023170 Helix-hairpin-helix, base-excision DNA repair, C-terminal;IPR044298 Adenine/Thymine-DNA glycosylase	ENOG503BJKG	L:(L) Replication, recombination and repair	GO_component: GO:0005634 - nucleus [Evidence IEA];GO_function: GO:0035485 - adenine/guanine mispair binding [Evidence IEA];GO_function: GO:0016798 - hydrolase activity, acting on glycosyl bonds [Evidence IEA];GO_function: GO:0034039 - 8-oxo-7,8-dihydroguanine DNA N-glycosylase activity [Evidence IEA];GO_function: GO:0032357 - oxidized purine DNA binding [Evidence IEA];GO_function: GO:0003677 - DN…
FUN_002113	FUN_002113-T1	mRNA	scaffold_2	18424732	18438561	+		hypothetical protein					IPR004839 Aminotransferase, class I/classII, large domain;IPR015421 Pyridoxal phosphate-dependent transferase, major domain;IPR015422 Pyridoxal phosphate-dependent transferase, small domain;IPR015424 Pyridoxal phosphate-dependent transferase;IPR050859 Class-I pyridoxal-phosphate-dependent aminotransferase-like	ENOG503BDH5	E:(E) Amino acid transport and metabolism	GO_function: GO:0016212 - kynurenine-oxoglutarate transaminase activity [Evidence IEA];GO_function: GO:0030170 - pyridoxal phosphate binding [Evidence IEA];GO_function: GO:0008483 - transaminase activity [Evidence IEA];GO_process: GO:0009058 - biosynthetic process [Evidence IEA];GO_process: GO:1901605 - alpha-amino acid metabolic process [Evidence IEA]
FUN_002115	FUN_002115-T1	mRNA	scaffold_2	18439282	18450626	-		hypothetical protein		3.4.21.92		PF00574	IPR001907 ATP-dependent Clp protease proteolytic subunit;IPR018215 ClpP, Ser active site;IPR023562 Clp protease proteolytic subunit /Translocation-enhancing protein TepA;IPR029045 ClpP/crotonase-like domain superfamily;IPR033135 ClpP, histidine active site	ENOG503BEPT	O:(O) Posttranslational modification, protein turnover, chaperones	GO_component: GO:0009368 - endopeptidase Clp complex [Evidence IEA];GO_function: GO:0051117 - ATPase binding [Evidence IEA];GO_function: GO:0004252 - serine-type endopeptidase activity [Evidence IEA];GO_function: GO:0004176 - ATP-dependent peptidase activity [Evidence IEA];GO_process: GO:0006508 - proteolysis [Evidence IEA];GO_process: GO:0006515 - protein quality control for misfolded or incompl…			S14
FUN_002116	FUN_002116-T1	mRNA	scaffold_2	18450760	18457847	+		hypothetical protein				PF00619	IPR001315 CARD domain;IPR011029 Death-like domain superfamily;IPR042476 Amyloid protein-binding protein 2	ENOG50	C:(C) Energy production and conversion	GO_component: GO:0031462 - Cul2-RING ubiquitin ligase complex [Evidence IEA];GO_function: GO:1990756 - ubiquitin-like ligase-substrate adaptor activity [Evidence IEA];GO_process: GO:0042981 - regulation of apoptotic process [Evidence IEA];GO_process: GO:0006886 - intracellular protein transport [Evidence IEA];GO_process: GO:0043161 - proteasome-mediated ubiquitin-dependent protein catabolic proce…
FUN_002117	FUN_002117-T1	mRNA	scaffold_2	18457874	18459384	+		hypothetical protein						ENOG50	C:(C) Energy production and conversion
FUN_002119	FUN_002119-T1	mRNA	scaffold_2	18506216	18545240	-	LRRC40_1	Leucine-rich repeat-containing protein 40				PF00560;PF13855	IPR001611 Leucine-rich repeat;IPR003591 Leucine-rich repeat, typical subtype;IPR032675 Leucine-rich repeat domain superfamily;IPR050216 Leucine-rich repeat domain-containing protein	ENOG503BJDK	S:(S) Function unknown	GO_component: GO:0005737 - cytoplasm [Evidence IEA];GO_function: GO:0005515 - protein binding [Evidence IEA]
FUN_002120	FUN_002120-T1	mRNA	scaffold_2	18545291	18550849	-	LRRC40_2	Leucine-rich repeat-containing protein 40				PF00560;PF13855	IPR003591 Leucine-rich repeat, typical subtype;IPR032675 Leucine-rich repeat domain superfamily;IPR050216 Leucine-rich repeat domain-containing protein;IPR055414 Disease resistance R13L4/SHOC-2-like, LRR domain	ENOG503BJDK	S:(S) Function unknown	GO_component: GO:0005737 - cytoplasm [Evidence IEA]
FUN_094760	FUN_094760-T1	mRNA	scaffold_2	18570897	18578852	+		hypothetical protein				PF05485;PF13613	IPR006612 THAP-type zinc finger;IPR027805 Transposase, Helix-turn-helix domain	ENOG503BSRK	S:(S) Function unknown
FUN_094761	FUN_094761-T1	mRNA	scaffold_2	18577619	18578867	+		hypothetical protein				PF13613	IPR027805 Transposase, Helix-turn-helix domain	ENOG503BT32	S:(S) Function unknown
FUN_002121	FUN_002121-T1	mRNA	scaffold_2	18583072	18596189	+		hypothetical protein		5.3.1.5			IPR001998 Xylose isomerase;IPR036237 Xylose isomerase-like superfamily	ENOG503BKAN	T:(T) Signal transduction mechanisms	GO_function: GO:0009045 - xylose isomerase activity [Evidence IEA];GO_process: GO:0005975 - carbohydrate metabolic process [Evidence IEA]
FUN_002122	FUN_002122-T1	mRNA	scaffold_2	18597943	18603512	+		hypothetical protein		5.3.1.5	2597at6447		IPR001998 Xylose isomerase;IPR036237 Xylose isomerase-like superfamily	ENOG503BKAN	G:(G) Carbohydrate transport and metabolism	GO_function: GO:0009045 - xylose isomerase activity [Evidence IEA];GO_process: GO:0005975 - carbohydrate metabolic process [Evidence IEA]
FUN_002123	FUN_002123-T1	mRNA	scaffold_2	18608463	18647178	-	UCKL1	Uridine-cytidine kinase-like 1		2.7.1.48		PF00485;PF14681	IPR000764 Uridine kinase-like;IPR000836 Phosphoribosyltransferase domain;IPR006083 Phosphoribulokinase/uridine kinase;IPR027417 P-loop containing nucleoside triphosphate hydrolase;IPR029057 Phosphoribosyltransferase-like	ENOG503BBTZ	F:(F) Nucleotide transport and metabolism	GO_function: GO:0016301 - kinase activity [Evidence IEA];GO_function: GO:0005524 - ATP binding [Evidence IEA]
FUN_002124	FUN_002124-T1	mRNA	scaffold_2	18647734	18662986	+		hypothetical protein		1.14.14.17		PF01494;PF08491	IPR013698 Squalene epoxidase;IPR036188 FAD/NAD(P)-binding domain superfamily;IPR039648 Pyridine nucleotide-disulphide oxidoreductase, N-terminal;IPR040125 Squalene monooxygenase	ENOG503BHPX	I:(I) Lipid transport and metabolism	GO_component: GO:0005783 - endoplasmic reticulum [Evidence IEA];GO_component: GO:0016020 - membrane [Evidence IEA];GO_function: GO:0050660 - flavin adenine dinucleotide binding [Evidence IEA];GO_function: GO:0004506 - squalene monooxygenase activity [Evidence IEA];GO_process: GO:0008203 - cholesterol metabolic process [Evidence IEA];GO_process: GO:0016126 - sterol biosynthetic process [Evidence I…
FUN_002125	FUN_002125-T1	mRNA	scaffold_2	18663022	18664634	+		hypothetical protein		1.14.14.17		PF08491	IPR013698 Squalene epoxidase;IPR036188 FAD/NAD(P)-binding domain superfamily;IPR040125 Squalene monooxygenase	ENOG503BHPX	I:(I) Lipid transport and metabolism	GO_component: GO:0005783 - endoplasmic reticulum [Evidence IEA];GO_component: GO:0016020 - membrane [Evidence IEA];GO_function: GO:0050660 - flavin adenine dinucleotide binding [Evidence IEA];GO_function: GO:0004506 - squalene monooxygenase activity [Evidence IEA];GO_process: GO:0008203 - cholesterol metabolic process [Evidence IEA];GO_process: GO:0016126 - sterol biosynthetic process [Evidence I…
FUN_002126	FUN_002126-T1	mRNA	scaffold_2	18701197	18712520	-	ANKRD66_1	Ankyrin repeat				PF00023;PF12796;PF13637;PF13857	IPR002110 Ankyrin repeat;IPR036770 Ankyrin repeat-containing domain superfamily;IPR050776 Ankyrin Repeat and Cyclin-Dependent Kinase Inhibitor	ENOG503CQGS	O:(O) Posttranslational modification, protein turnover, chaperones	GO_function: GO:0005515 - protein binding [Evidence IEA]
FUN_002138	FUN_002138-T1	mRNA	scaffold_2	18720286	18985245	+	RNF14_1	E3 ubiquitin-protein ligase rnf14		2.3.2.31		PF01485;PF05773;PF22191	IPR001841 Zinc finger, RING-type;IPR002867 IBR domain;IPR006575 RWD domain;IPR013083 Zinc finger, RING/FYVE/PHD-type;IPR016135 Ubiquitin-conjugating enzyme/RWD-like;IPR017907 Zinc finger, RING-type, conserved site;IPR031127 E3 ubiquitin ligase RBR family;IPR044066 TRIAD supradomain;IPR047548 E3 ubiquitin-protein ligase RNF14, Rcat domain	ENOG503BBYH	O:(O) Posttranslational modification, protein turnover, chaperones	GO_function: GO:0004842 - ubiquitin-protein transferase activity [Evidence IEA];GO_function: GO:0005515 - protein binding [Evidence IEA];GO_function: GO:0008270 - zinc ion binding [Evidence IEA];GO_process: GO:0016567 - protein ubiquitination [Evidence IEA]
FUN_002138	FUN_002138-T2	mRNA	scaffold_2	18720286	18985245	+	RNF14_1	E3 ubiquitin-protein ligase rnf14, variant 2		2.3.2.31		PF01485;PF05773;PF22191	IPR001841 Zinc finger, RING-type;IPR002867 IBR domain;IPR006575 RWD domain;IPR013083 Zinc finger, RING/FYVE/PHD-type;IPR016135 Ubiquitin-conjugating enzyme/RWD-like;IPR017907 Zinc finger, RING-type, conserved site;IPR031127 E3 ubiquitin ligase RBR family;IPR044066 TRIAD supradomain;IPR047548 E3 ubiquitin-protein ligase RNF14, Rcat domain	ENOG503BBYH	O:(O) Posttranslational modification, protein turnover, chaperones	GO_function: GO:0004842 - ubiquitin-protein transferase activity [Evidence IEA];GO_function: GO:0005515 - protein binding [Evidence IEA];GO_function: GO:0008270 - zinc ion binding [Evidence IEA];GO_process: GO:0016567 - protein ubiquitination [Evidence IEA]
FUN_002129	FUN_002129-T1	mRNA	scaffold_2	18734749	18738764	+		hypothetical protein		2.3.2.31		PF01485;PF22191	IPR002867 IBR domain;IPR044066 TRIAD supradomain;IPR051628 Linear Ubiquitination-Associated E3 Ligases	ENOG50KOG1812	S:(S) Function unknown	GO_function: GO:0008270 - zinc ion binding [Evidence IEA]
FUN_002131	FUN_002131-T1	mRNA	scaffold_2	18788252	18788888	-		hypothetical protein
FUN_002132	FUN_002132-T1	mRNA	scaffold_2	18828254	18837359	-		hypothetical protein				PF00633;PF00730	IPR000445 Helix-hairpin-helix motif;IPR003265 HhH-GPD domain;IPR003651 Endonuclease III-like, iron-sulphur cluster loop motif;IPR004035 Endonuclease III, iron-sulphur binding site;IPR004036 Endonuclease III-like, conserved site-2;IPR011257 DNA glycosylase;IPR023170 Helix-hairpin-helix, base-excision DNA repair, C-terminal;IPR044298 Adenine/Thymine-DNA glycosylase	ENOG503BJKG	L:(L) Replication, recombination and repair	GO_component: GO:0005634 - nucleus [Evidence IEA];GO_function: GO:0051539 - 4 iron, 4 sulfur cluster binding [Evidence IEA];GO_function: GO:0035485 - adenine/guanine mispair binding [Evidence IEA];GO_function: GO:0016798 - hydrolase activity, acting on glycosyl bonds [Evidence IEA];GO_function: GO:0034039 - 8-oxo-7,8-dihydroguanine DNA N-glycosylase activity [Evidence IEA];GO_function: GO:0032357…
FUN_002134	FUN_002134-T1	mRNA	scaffold_2	18841433	18855917	+		hypothetical protein					IPR004839 Aminotransferase, class I/classII, large domain;IPR015421 Pyridoxal phosphate-dependent transferase, major domain;IPR015424 Pyridoxal phosphate-dependent transferase;IPR050859 Class-I pyridoxal-phosphate-dependent aminotransferase-like	ENOG503BDH5	E:(E) Amino acid transport and metabolism	GO_function: GO:0016212 - kynurenine-oxoglutarate transaminase activity [Evidence IEA];GO_function: GO:0030170 - pyridoxal phosphate binding [Evidence IEA];GO_function: GO:0008483 - transaminase activity [Evidence IEA];GO_process: GO:0009058 - biosynthetic process [Evidence IEA];GO_process: GO:1901605 - alpha-amino acid metabolic process [Evidence IEA]
FUN_002135	FUN_002135-T1	mRNA	scaffold_2	18874173	18882217	-		hypothetical protein		3.4.21.92		PF05485	IPR006612 THAP-type zinc finger;IPR023562 Clp protease proteolytic subunit /Translocation-enhancing protein TepA	ENOG503BEPT	O:(O) Posttranslational modification, protein turnover, chaperones				S14
FUN_002139	FUN_002139-T1	mRNA	scaffold_2	18919950	18923309	+		hypothetical protein		2.3.2.31		PF01485;PF22191	IPR002867 IBR domain;IPR031127 E3 ubiquitin ligase RBR family;IPR044066 TRIAD supradomain	ENOG503BP6H	O:(O) Posttranslational modification, protein turnover, chaperones	GO_function: GO:0004842 - ubiquitin-protein transferase activity [Evidence IEA];GO_function: GO:0008270 - zinc ion binding [Evidence IEA];GO_process: GO:0016567 - protein ubiquitination [Evidence IEA]
FUN_002141	FUN_002141-T1	mRNA	scaffold_2	18957845	18993465	-		hypothetical protein		1.14.99.29	5850at6447	PF03130;PF13646	IPR004155 PBS lyase HEAT-like repeat;IPR011989 Armadillo-like helical;IPR016024 Armadillo-type fold	ENOG503BEHM	C:(C) Energy production and conversion	GO_function: GO:0019135 - deoxyhypusine monooxygenase activity [Evidence IEA];GO_function: GO:0016491 - oxidoreductase activity [Evidence IEA];GO_process: GO:0008612 - peptidyl-lysine modification to peptidyl-hypusine [Evidence IEA]
FUN_002141	FUN_002141-T2	mRNA	scaffold_2	18957845	18993465	-		hypothetical protein		1.14.99.29	5850at6447	PF03130;PF13646	IPR004155 PBS lyase HEAT-like repeat;IPR011989 Armadillo-like helical;IPR016024 Armadillo-type fold	ENOG503BEHM	C:(C) Energy production and conversion	GO_function: GO:0019135 - deoxyhypusine monooxygenase activity [Evidence IEA];GO_function: GO:0016491 - oxidoreductase activity [Evidence IEA];GO_process: GO:0008612 - peptidyl-lysine modification to peptidyl-hypusine [Evidence IEA]
FUN_002142	FUN_002142-T1	mRNA	scaffold_2	18993881	19026971	+	NRD1_1	Nrd1 complex RNA-binding subunit		3.4.24.61		PF00675	IPR001431 Peptidase M16, zinc-binding site;IPR011249 Metalloenzyme, LuxS/M16 peptidase-like;IPR011765 Peptidase M16, N-terminal;IPR050626 Peptidase M16	ENOG503BEGQ	O:(O) Posttranslational modification, protein turnover, chaperones	GO_function: GO:0004222 - metalloendopeptidase activity [Evidence IEA];GO_function: GO:0046872 - metal ion binding [Evidence IEA];GO_process: GO:0006508 - proteolysis [Evidence IEA]			M16A
FUN_002143	FUN_002143-T1	mRNA	scaffold_2	19030307	19041345	-	RCL1_1	rRNA-processing endoribonuclease				PF05189	IPR000228 RNA 3'-terminal phosphate cyclase;IPR013791 RNA 3'-terminal phosphate cyclase, insert domain;IPR036553 RNA 3'-terminal phosphate cyclase, insert domain superfamily;IPR037136 RNA 3'-terminal phosphate cyclase domain superfamily	ENOG503BBGZ	A:(A) RNA processing and modification	GO_component: GO:0005730 - nucleolus [Evidence IEA];GO_function: GO:0004521 - RNA endonuclease activity [Evidence IEA];GO_process: GO:0000479 - endonucleolytic cleavage of tricistronic rRNA transcript (SSU-rRNA, 5.8S rRNA, LSU-rRNA) [Evidence IEA];GO_process: GO:0006396 - RNA processing [Evidence IEA]
FUN_002146	FUN_002146-T1	mRNA	scaffold_2	19071955	19076309	+	ANKRD66_2	Ankyrin repeat domain 66				PF00023	IPR002110 Ankyrin repeat;IPR036770 Ankyrin repeat-containing domain superfamily	ENOG503BYP4	S:(S) Function unknown	GO_function: GO:0005515 - protein binding [Evidence IEA]
FUN_002147	FUN_002147-T1	mRNA	scaffold_2	19082605	19087450	+		hypothetical protein
FUN_002149	FUN_002149-T1	mRNA	scaffold_2	19181159	19186496	-		hypothetical protein			5193at6447			ENOG503BH74	S:(S) Function unknown
FUN_002150	FUN_002150-T1	mRNA	scaffold_2	19199909	19211079	-		hypothetical protein
FUN_002151	FUN_002151-T1	mRNA	scaffold_2	19233315	19234698	+	TMEM86A_1	Lysoplasmalogenase-like protein tmem86a		3.3.2.2		PF07947	IPR012506 Lysoplasmalogenase-like	ENOG503BIQ7	S:(S) Function unknown	GO_component: GO:0016020 - membrane [Evidence IEA]
FUN_002152	FUN_002152-T1	mRNA	scaffold_2	19238352	19238728	-		hypothetical protein
FUN_002154	FUN_002154-T1	mRNA	scaffold_2	19244128	19247541	-		hypothetical protein					IPR052728 Oxygen and lipid transport regulator	ENOG503BE7Z	S:(S) Function unknown
FUN_002156	FUN_002156-T1	mRNA	scaffold_2	19317738	19334758	-		hypothetical protein
FUN_002157	FUN_002157-T1	mRNA	scaffold_2	19352238	19353878	-		hypothetical protein		6.2.1.8		PF00501;PF13193	IPR000873 AMP-dependent synthetase/ligase domain;IPR025110 AMP-binding enzyme, C-terminal domain;IPR042099 ANL, N-terminal domain;IPR045851 AMP-binding enzyme, C-terminal domain superfamily	ENOG50KOG1176	I:(I) Lipid transport and metabolism;Q:(Q) Secondary metabolites biosynthesis, transport and catabolism	GO_function: GO:0031956 - medium-chain fatty acid-CoA ligase activity [Evidence IEA];GO_process: GO:0006631 - fatty acid metabolic process [Evidence IEA]
FUN_002160	FUN_002160-T1	mRNA	scaffold_2	19366298	19367950	+		hypothetical protein		6.2.1.3		PF00501;PF13193	IPR000873 AMP-dependent synthetase/ligase domain;IPR020845 AMP-binding, conserved site;IPR025110 AMP-binding enzyme, C-terminal domain;IPR042099 ANL, N-terminal domain;IPR045851 AMP-binding enzyme, C-terminal domain superfamily	ENOG501G2H0	I:(I) Lipid transport and metabolism;Q:(Q) Secondary metabolites biosynthesis, transport and catabolism	GO_function: GO:0031956 - medium-chain fatty acid-CoA ligase activity [Evidence IEA];GO_process: GO:0006631 - fatty acid metabolic process [Evidence IEA]
FUN_002161	FUN_002161-T1	mRNA	scaffold_2	19370907	19383782	+		hypothetical protein				PF04970	IPR007053 LRAT domain;IPR051496 H-rev107 Phospholipase/Acyltransferase	ENOG502VT61	K:(K) Transcription;T:(T) Signal transduction mechanisms	GO_component: GO:0005737 - cytoplasm [Evidence IEA];GO_function: GO:0004623 - phospholipase A2 activity [Evidence IEA];GO_function: GO:0008970 - phospholipase A1 activity [Evidence IEA];GO_function: GO:0016410 - N-acyltransferase activity [Evidence IEA];GO_process: GO:0070292 - N-acylphosphatidylethanolamine metabolic process [Evidence IEA]
FUN_002162	FUN_002162-T1	mRNA	scaffold_2	19410529	19420562	+		hypothetical protein				PF04970	IPR007053 LRAT domain;IPR051496 H-rev107 Phospholipase/Acyltransferase	ENOG503BQF1	S:(S) Function unknown	GO_component: GO:0005737 - cytoplasm [Evidence IEA];GO_function: GO:0004623 - phospholipase A2 activity [Evidence IEA];GO_function: GO:0008970 - phospholipase A1 activity [Evidence IEA];GO_function: GO:0016410 - N-acyltransferase activity [Evidence IEA];GO_process: GO:0070292 - N-acylphosphatidylethanolamine metabolic process [Evidence IEA]
FUN_002164	FUN_002164-T1	mRNA	scaffold_2	19439594	19459122	+	NRD1_2	Nrd1 complex RNA-binding subunit		3.4.24.61		PF05193;PF16187;PF22456	IPR007863 Peptidase M16, C-terminal;IPR011249 Metalloenzyme, LuxS/M16 peptidase-like;IPR032632 Peptidase M16, middle/third domain;IPR050626 Peptidase M16	ENOG503BEGQ	O:(O) Posttranslational modification, protein turnover, chaperones	GO_function: GO:0046872 - metal ion binding [Evidence IEA]			M16A
FUN_002165	FUN_002165-T1	mRNA	scaffold_2	19461708	19469202	-	RCL1_2	rRNA-processing endoribonuclease				PF01137;PF05189	IPR000228 RNA 3'-terminal phosphate cyclase;IPR013791 RNA 3'-terminal phosphate cyclase, insert domain;IPR013792 RNA 3'-terminal phosphate cyclase/enolpyruvate transferase, alpha/beta;IPR020719 RNA 3'-terminal phosphate cyclase-like, conserved site;IPR023797 RNA 3'-terminal phosphate cyclase domain;IPR036553 RNA 3'-terminal phosphate cyclase, insert domain superfamily	ENOG503BBGZ	A:(A) RNA processing and modification	GO_component: GO:0005730 - nucleolus [Evidence IEA];GO_function: GO:0004521 - RNA endonuclease activity [Evidence IEA];GO_function: GO:0003824 - catalytic activity [Evidence IEA];GO_process: GO:0000479 - endonucleolytic cleavage of tricistronic rRNA transcript (SSU-rRNA, 5.8S rRNA, LSU-rRNA) [Evidence IEA];GO_process: GO:0006396 - RNA processing [Evidence IEA]
FUN_002166	FUN_002166-T1	mRNA	scaffold_2	19469745	19471761	-	RCL1_3	rRNA-processing endoribonuclease				PF01137	IPR000228 RNA 3'-terminal phosphate cyclase;IPR013792 RNA 3'-terminal phosphate cyclase/enolpyruvate transferase, alpha/beta;IPR023797 RNA 3'-terminal phosphate cyclase domain;IPR037136 RNA 3'-terminal phosphate cyclase domain superfamily	ENOG503BBGZ	A:(A) RNA processing and modification	GO_component: GO:0005730 - nucleolus [Evidence IEA];GO_function: GO:0004521 - RNA endonuclease activity [Evidence IEA];GO_function: GO:0003824 - catalytic activity [Evidence IEA];GO_process: GO:0000479 - endonucleolytic cleavage of tricistronic rRNA transcript (SSU-rRNA, 5.8S rRNA, LSU-rRNA) [Evidence IEA];GO_process: GO:0006396 - RNA processing [Evidence IEA]
FUN_002167	FUN_002167-T1	mRNA	scaffold_2	19472157	19477800	+	ERCC8	DNA excision repair protein ERCC-8			4486at6447	PF00400	IPR001680 WD40 repeat;IPR015943 WD40/YVTN repeat-like-containing domain superfamily;IPR019775 WD40 repeat, conserved site;IPR020472 G-protein beta WD-40 repeat;IPR036322 WD40-repeat-containing domain superfamily;IPR042238 DNA excision repair protein Rad28/ERCC8/Ckn1/ATCSA-1	ENOG503BGYR	K:(K) Transcription;L:(L) Replication, recombination and repair	GO_component: GO:0031464 - Cul4A-RING E3 ubiquitin ligase complex [Evidence IEA];GO_component: GO:0000109 - nucleotide-excision repair complex [Evidence IEA];GO_function: GO:0005515 - protein binding [Evidence IEA];GO_process: GO:0000209 - protein polyubiquitination [Evidence IEA];GO_process: GO:0006283 - transcription-coupled nucleotide-excision repair [Evidence IEA];GO_process: GO:0043161 - pro…
FUN_002170	FUN_002170-T1	mRNA	scaffold_2	19488841	19499964	-	HDAC3	Histone deacetylase 3		3.5.1.98	2201at6447	PF00850	IPR000286 Histone deacetylase family;IPR003084 Histone deacetylase;IPR023696 Ureohydrolase domain superfamily;IPR023801 Histone deacetylase domain;IPR037138 Histone deacetylase domain superfamily;IPR050284 Histone deacetylase and polyamine deacetylase	ENOG503BFEI	B:(B) Chromatin structure and dynamics	GO_function: GO:0004407 - histone deacetylase activity [Evidence IEA];GO_process: GO:0016575 - obsolete histone deacetylation [Evidence IEA];GO_process: GO:0040029 - epigenetic regulation of gene expression [Evidence IEA]
FUN_002171	FUN_002171-T1	mRNA	scaffold_2	19500080	19509481	+	FBXO4	common myeloid progenitor cell proliferation			7123at6447	PF00646;PF12937	IPR001810 F-box domain;IPR027417 P-loop containing nucleoside triphosphate hydrolase;IPR036047 F-box-like domain superfamily;IPR039588 F-box only protein 4	ENOG503BGKH	S:(S) Function unknown	GO_component: GO:0019005 - SCF ubiquitin ligase complex [Evidence IEA];GO_function: GO:0005515 - protein binding [Evidence IEA];GO_process: GO:0000209 - protein polyubiquitination [Evidence IEA];GO_process: GO:0031146 - SCF-dependent proteasomal ubiquitin-dependent protein catabolic process [Evidence IEA]
FUN_002174	FUN_002174-T1	mRNA	scaffold_2	19591620	19603301	+	CES2_1	Cocaine esterase				PF00135	IPR002018 Carboxylesterase, type B;IPR019826 Carboxylesterase type B, active site;IPR029058 Alpha/Beta hydrolase fold;IPR051093 Neuroligin and Bile salt-activated lipase	ENOG503BGG6	I:(I) Lipid transport and metabolism				S09X
FUN_002177	FUN_002177-T1	mRNA	scaffold_2	19631644	19654091	+		hypothetical protein						ENOG503C1B4
FUN_002177	FUN_002177-T2	mRNA	scaffold_2	19631644	19654091	+		hypothetical protein						ENOG503C1B4
FUN_002181	FUN_002181-T1	mRNA	scaffold_2	19650164	19660175	+		hypothetical protein						ENOG503C1B4
FUN_002182	FUN_002182-T1	mRNA	scaffold_2	19668739	19685621	-		hypothetical protein
FUN_002183	FUN_002183-T1	mRNA	scaffold_2	19729058	19768003	+		hypothetical protein
FUN_002185	FUN_002185-T1	mRNA	scaffold_2	19815274	19823524	-		hypothetical protein			10303at6447	PF07904	IPR012423 Chromatin modification-related protein Eaf7/MRGBP	ENOG503BSPN	S:(S) Function unknown	GO_component: GO:0035267 - NuA4 histone acetyltransferase complex [Evidence IEA];GO_component: GO:0005634 - nucleus [Evidence IEA];GO_component: GO:0043189 - H4/H2A histone acetyltransferase complex [Evidence IEA];GO_process: GO:0006357 - regulation of transcription by RNA polymerase II [Evidence IEA];GO_process: GO:0006355 - regulation of DNA-templated transcription [Evidence IEA]
FUN_002186	FUN_002186-T1	mRNA	scaffold_2	19824863	19883923	+	DDX43_1	putative ATP-dependent RNA helicase ddx43		3.6.4.13	3670at6447	PF00013;PF00270;PF00271	IPR000629 ATP-dependent RNA helicase DEAD-box, conserved site;IPR001650 Helicase, C-terminal domain-like;IPR004087 K Homology domain;IPR004088 K Homology domain, type 1;IPR011545 DEAD/DEAH box helicase domain;IPR014001 Helicase superfamily 1/2, ATP-binding domain;IPR027417 P-loop containing nucleoside triphosphate hydrolase;IPR036612 K Homology domain, type 1 superfamily	ENOG503B9S5	A:(A) RNA processing and modification	GO_function: GO:0003723 - RNA binding [Evidence IEA];GO_function: GO:0005524 - ATP binding [Evidence IEA];GO_function: GO:0003676 - nucleic acid binding [Evidence IEA]
FUN_002189	FUN_002189-T1	mRNA	scaffold_2	19928748	19973867	+	CSPP1_1	positive regulation of cytokinesis						ENOG503BK2F	S:(S) Function unknown
FUN_002190	FUN_002190-T1	mRNA	scaffold_2	20008603	20021563	+	CSPP1_2	positive regulation of cytokinesis					IPR026708 Centrosome and spindle pole associated protein 1	ENOG503BK2F	S:(S) Function unknown	GO_component: GO:0005813 - centrosome [Evidence IEA];GO_component: GO:0005874 - microtubule [Evidence IEA];GO_component: GO:0000922 - spindle pole [Evidence IEA];GO_process: GO:0032467 - positive regulation of cytokinesis [Evidence IEA]
FUN_002191	FUN_002191-T1	mRNA	scaffold_2	20021580	20037259	+	CSPP1_3	positive regulation of cytokinesis				PF24578	IPR026708 Centrosome and spindle pole associated protein 1	ENOG503BK2F	S:(S) Function unknown	GO_component: GO:0005813 - centrosome [Evidence IEA];GO_component: GO:0005874 - microtubule [Evidence IEA];GO_component: GO:0000922 - spindle pole [Evidence IEA];GO_process: GO:0032467 - positive regulation of cytokinesis [Evidence IEA]
FUN_002196	FUN_002196-T1	mRNA	scaffold_2	20138691	20148185	-		hypothetical protein
FUN_002198	FUN_002198-T1	mRNA	scaffold_2	20176543	20177189	-		hypothetical protein
FUN_002201	FUN_002201-T1	mRNA	scaffold_2	20201022	20201481	-		hypothetical protein
FUN_002203	FUN_002203-T1	mRNA	scaffold_2	20212426	20233324	+	PTGER4_3	Prostaglandin E2 receptor EP4 subtype				PF00001;PF10328	IPR000276 G protein-coupled receptor, rhodopsin-like;IPR001758 Prostanoid EP4 receptor;IPR008365 Prostanoid receptor;IPR017452 GPCR, rhodopsin-like, 7TM	ENOG503BHKU	T:(T) Signal transduction mechanisms	GO_component: GO:0016020 - membrane [Evidence IEA];GO_component: GO:0005886 - plasma membrane [Evidence IEA];GO_function: GO:0004957 - prostaglandin E receptor activity [Evidence IEA];GO_function: GO:0004930 - G protein-coupled receptor activity [Evidence IEA];GO_process: GO:0006954 - inflammatory response [Evidence IEA];GO_process: GO:0007186 - G protein-coupled receptor signaling pathway [Evide…
[truncated: 52,112 more rows]

## Sheet: Table S3
Table S3. Quantification results of the predicted HDH protein repertoire.
[truncated: 3,918 more rows]

## Sheet: Table S4
Table S4. BLAST results between the predicted HDH protein repertoire and the two authoritative allergen databases: WHO/IUIS Nomenclature and AllergenOnline.
[truncated: 292 more rows]

[truncated: 2 more sheets: Table S5, Table S6]
