# Supplementary material
Source: Research Square preprint supplement (doi:10.21203/rs.3.rs-9243755/v1)

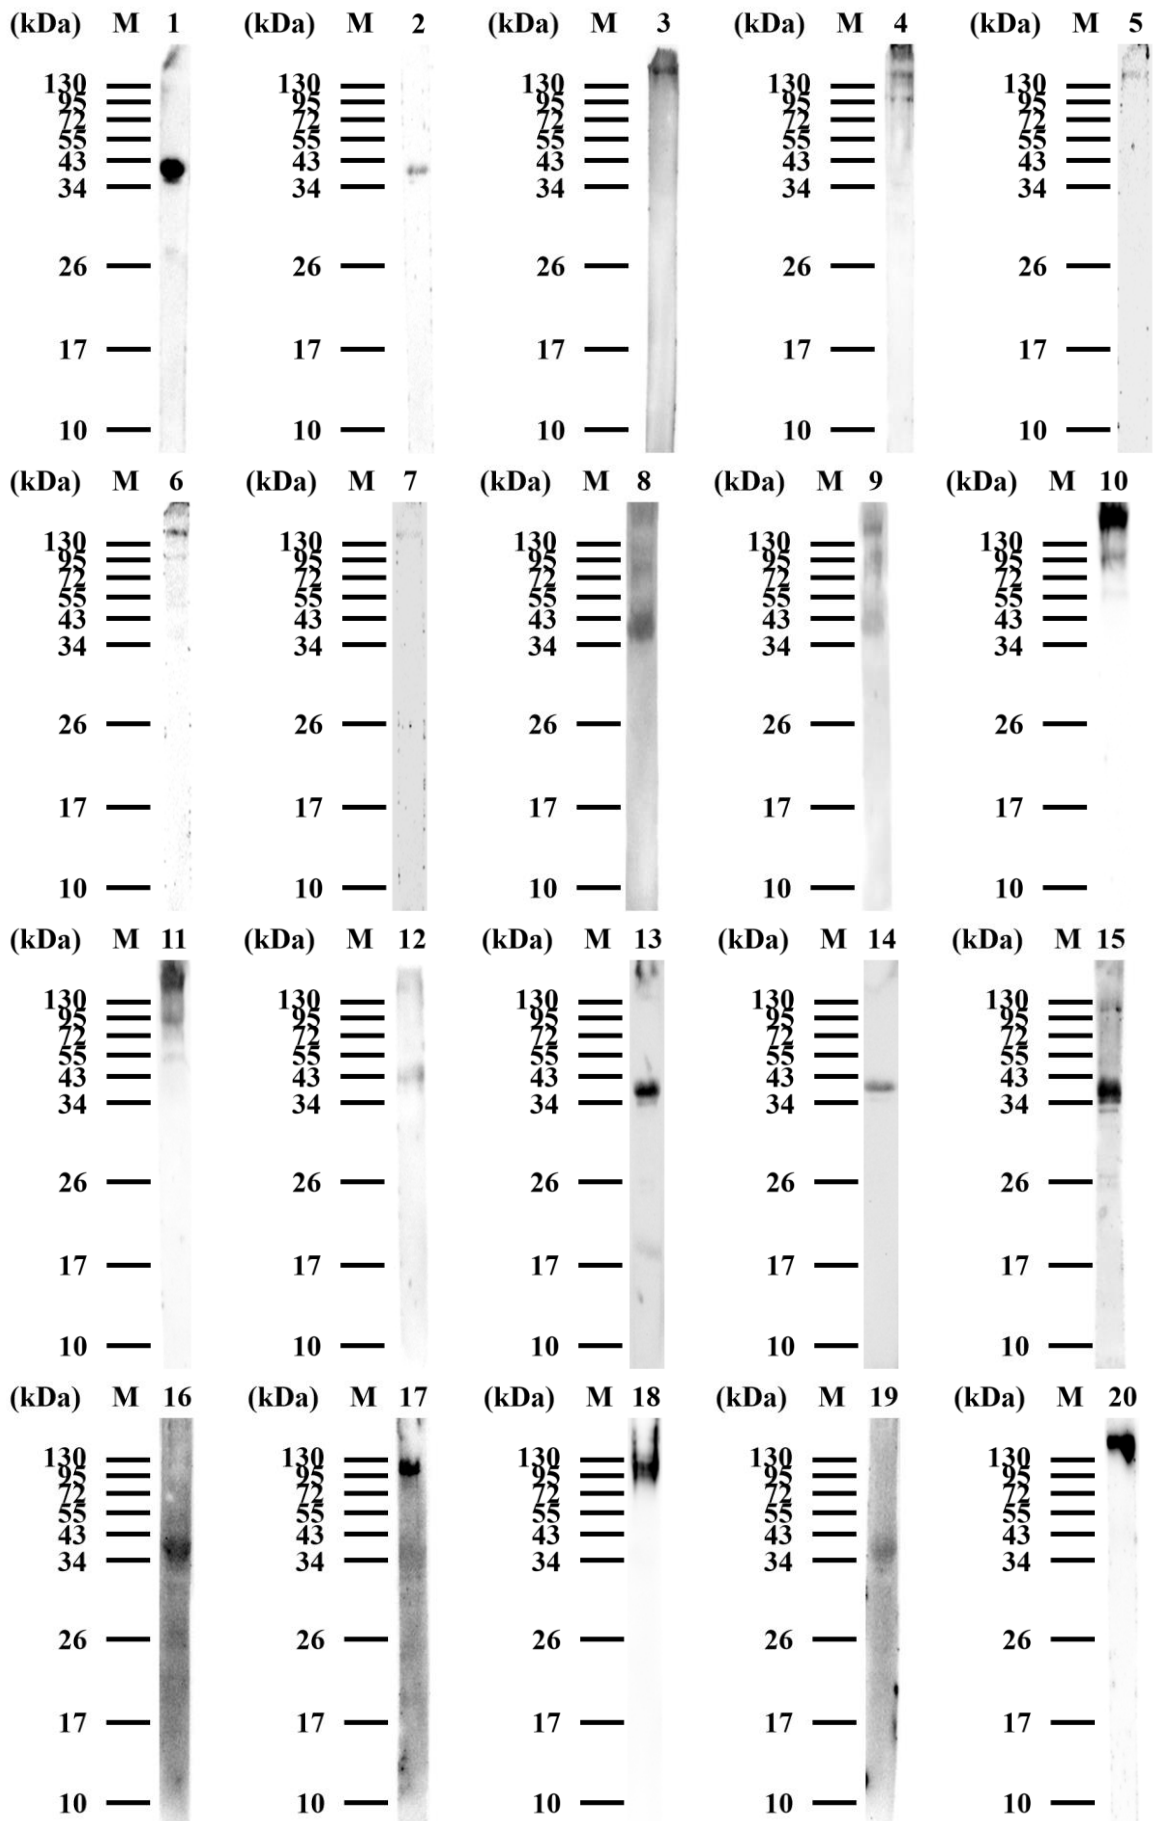

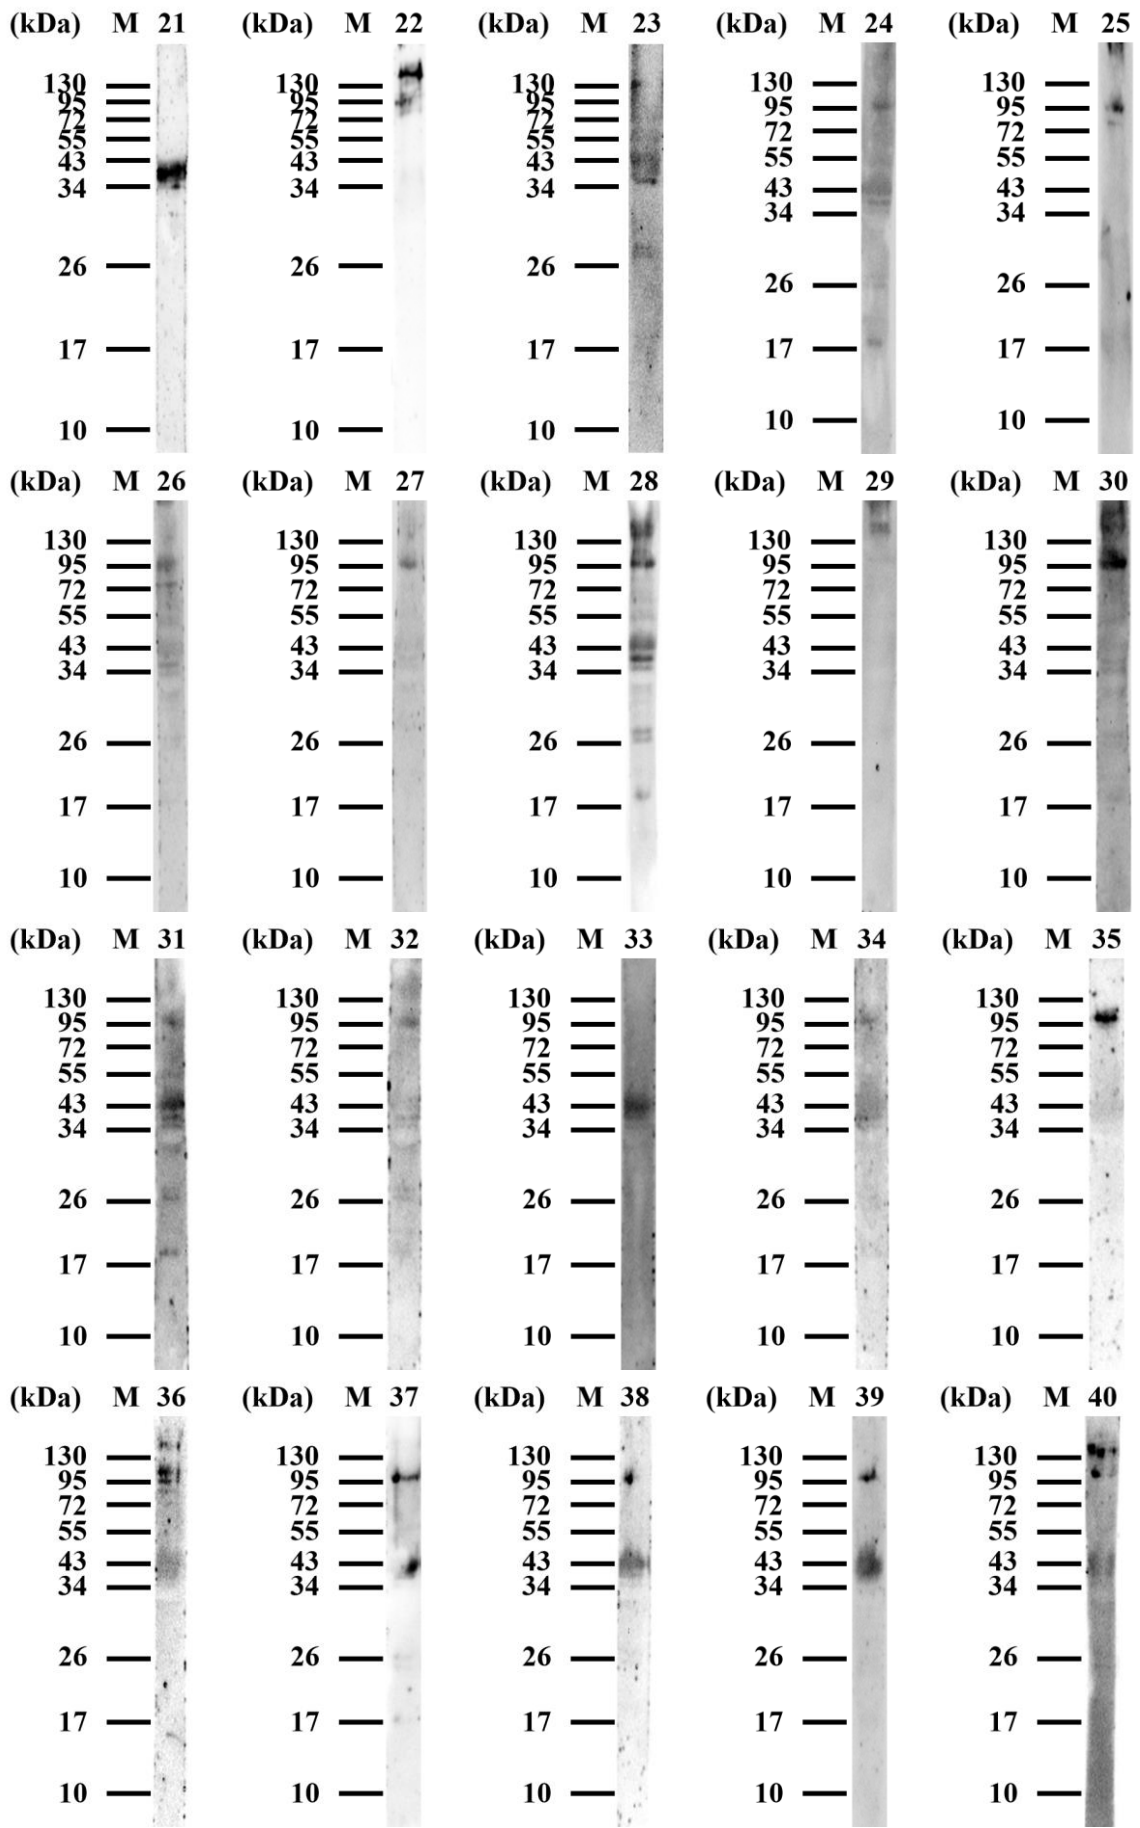

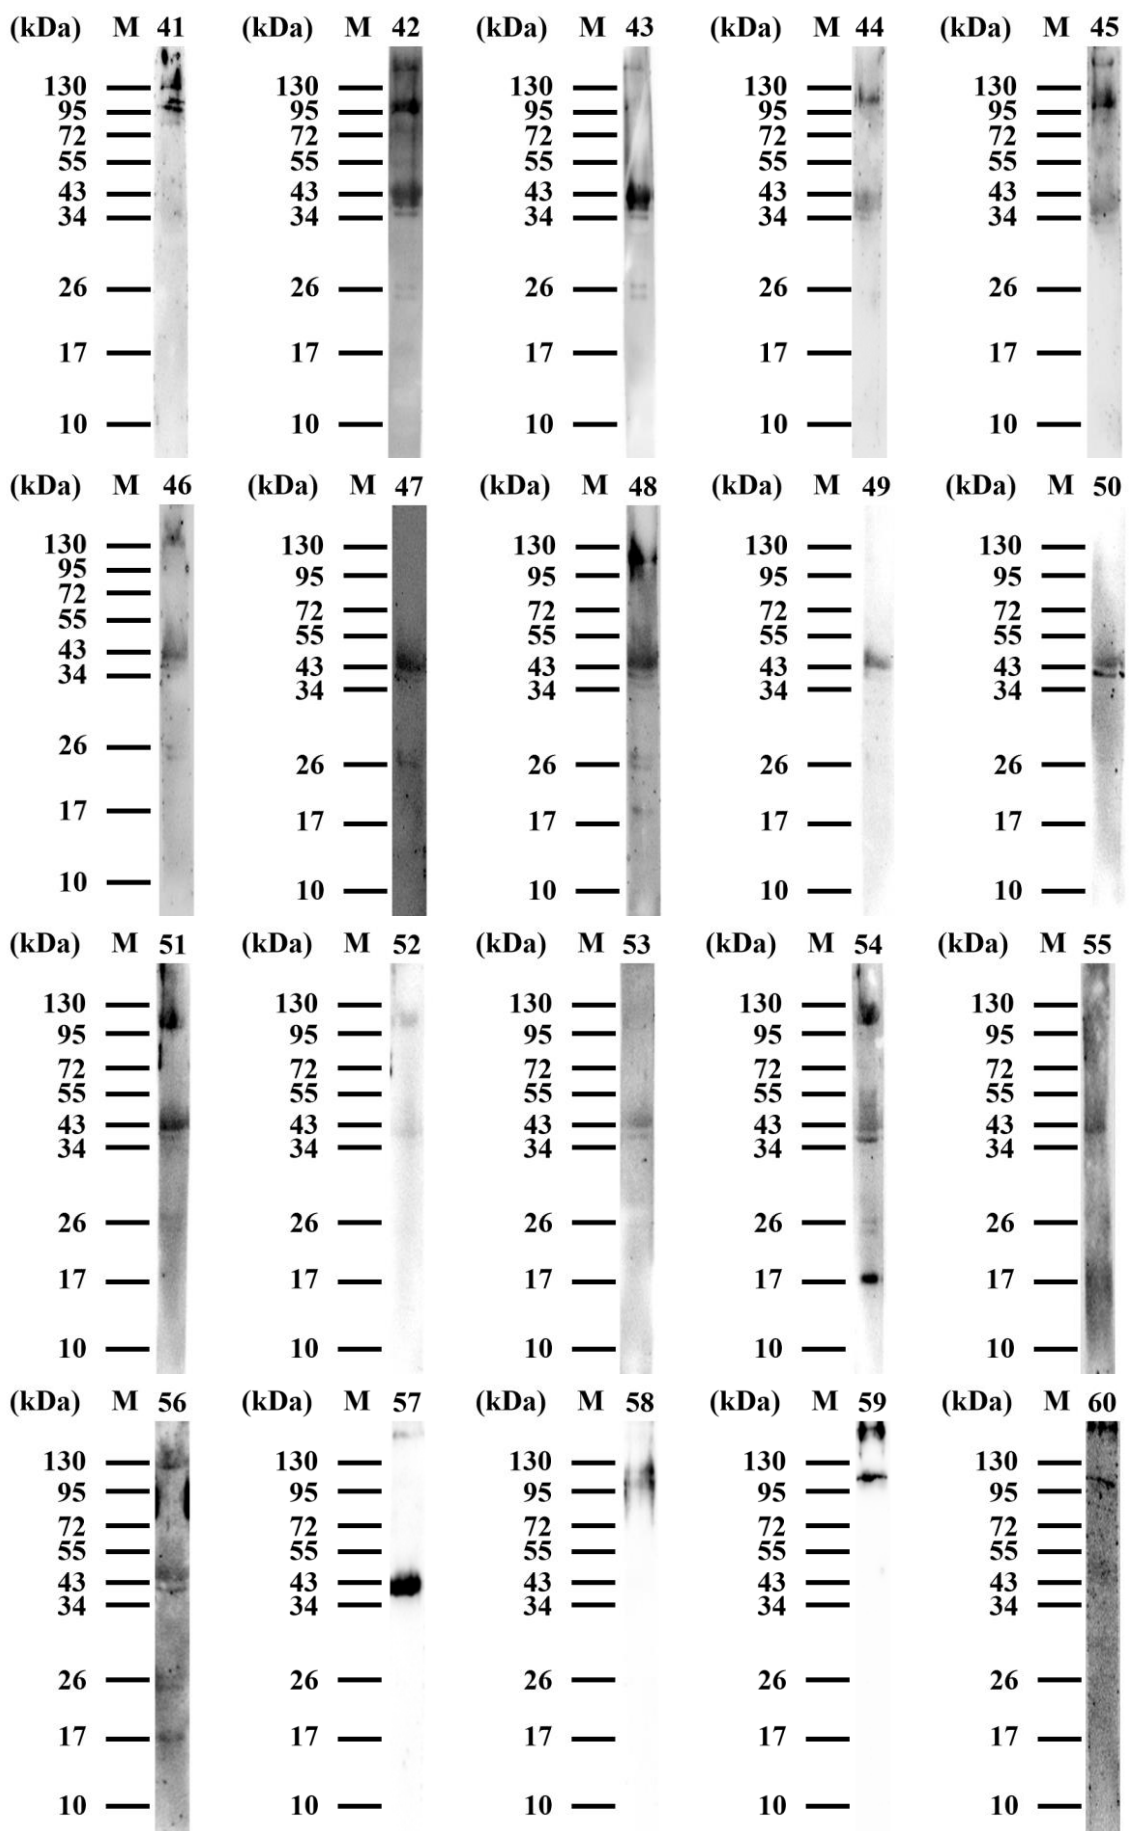

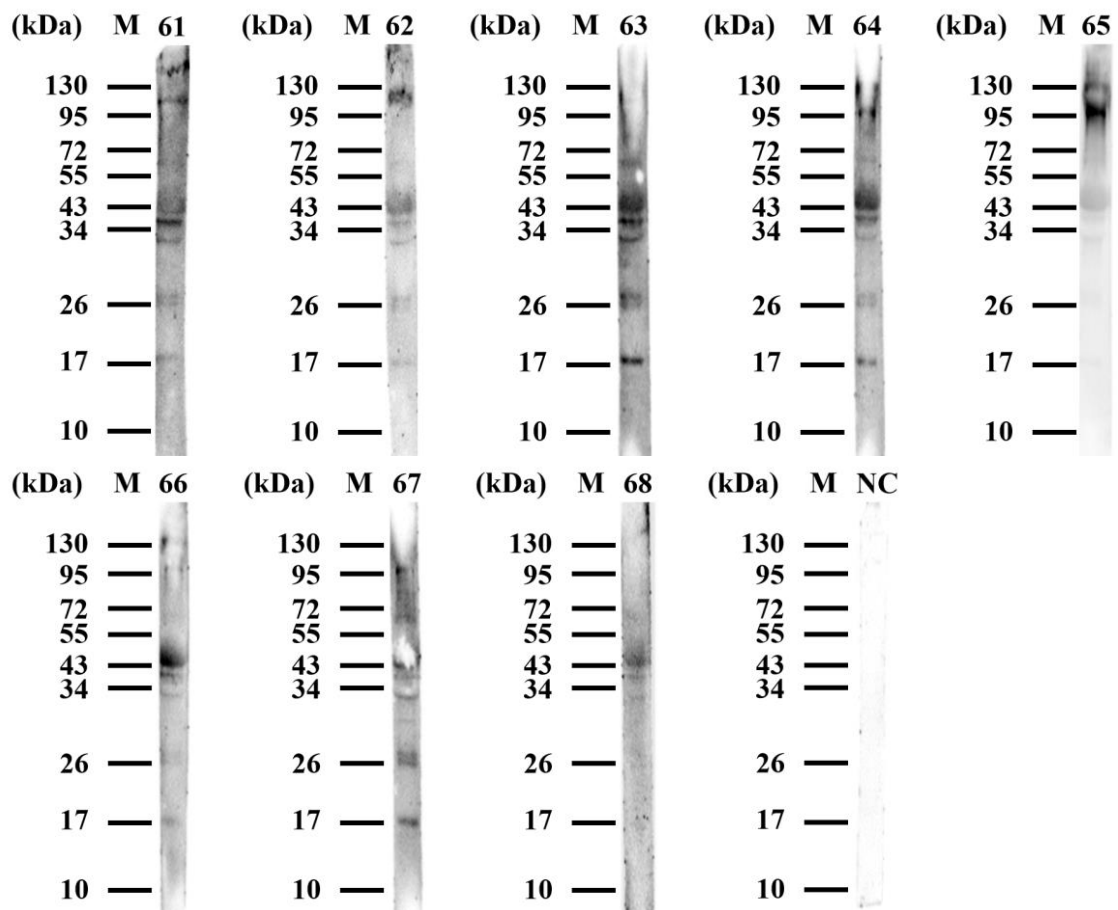

Supplement: Supplementary file 2 [file 9129ea39a569221d671fcad8.pdf]

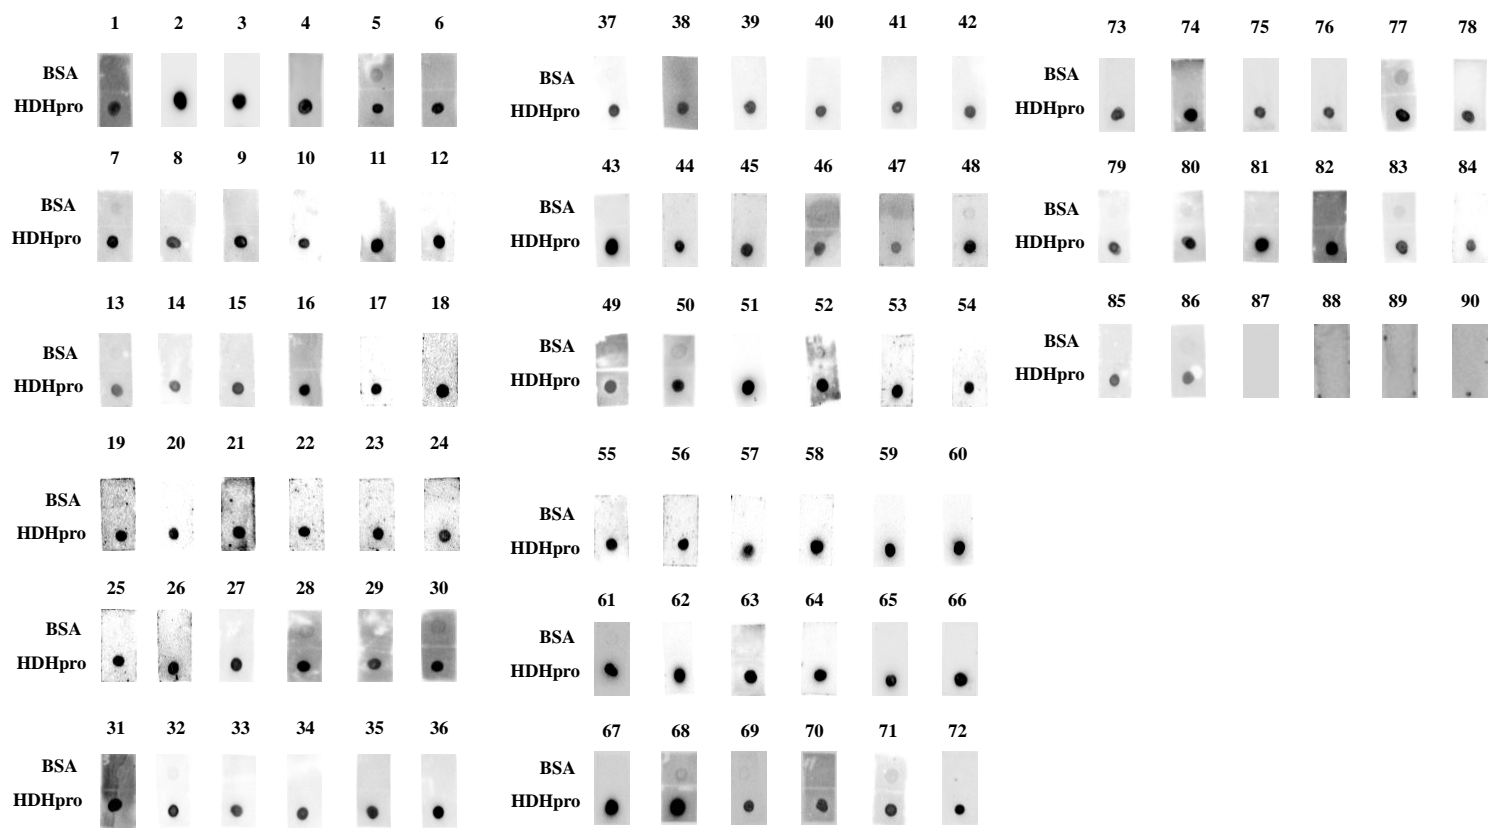

Supplement: Supplementary file 3 [file adc6884272220b0a10a9f454.pdf]

**A**

NC 15.0 10.0 9.0 7.0 5.0 3.0 1.5 0.3 PC (mM)

SDS

SDS

β-me

β-me

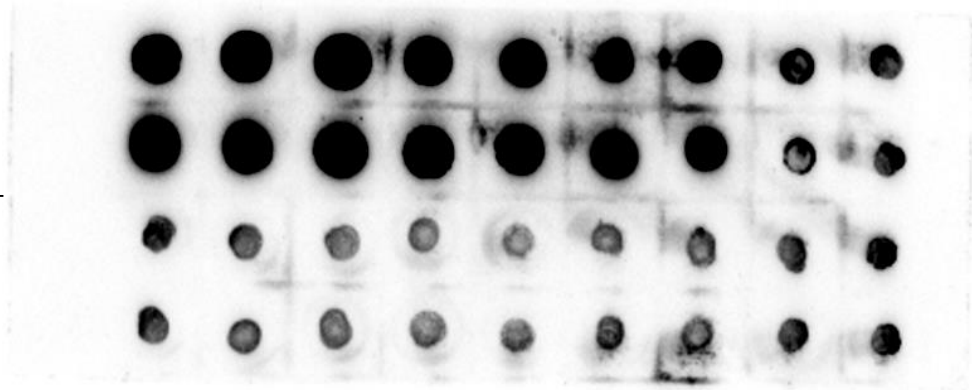

PM-sIgG

NC 3.0 2.5 2.0 1.8 1.5 1.0 0.7 0.5 PC (M)

**B**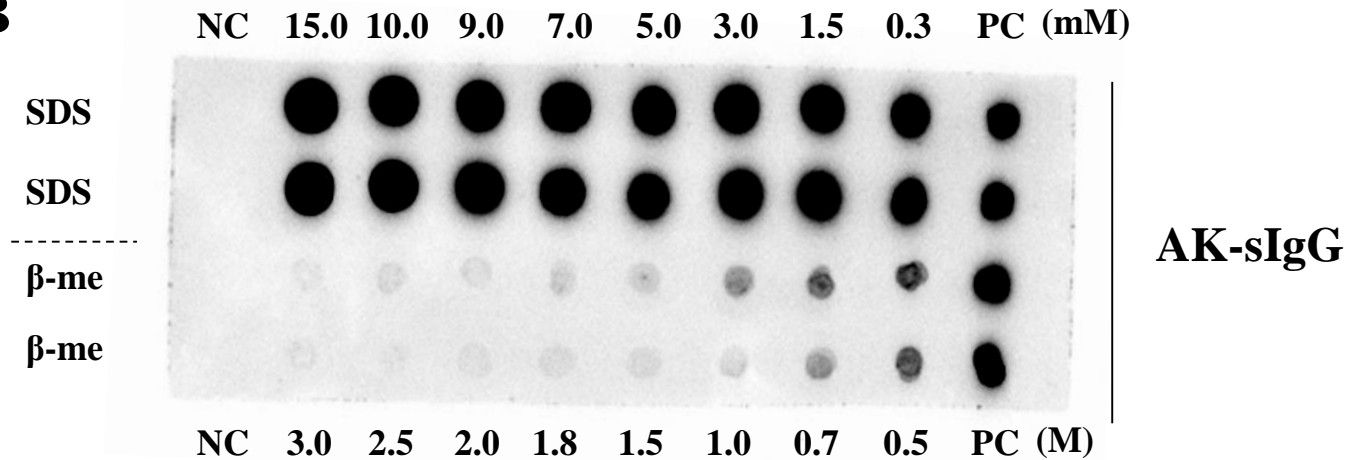

**C**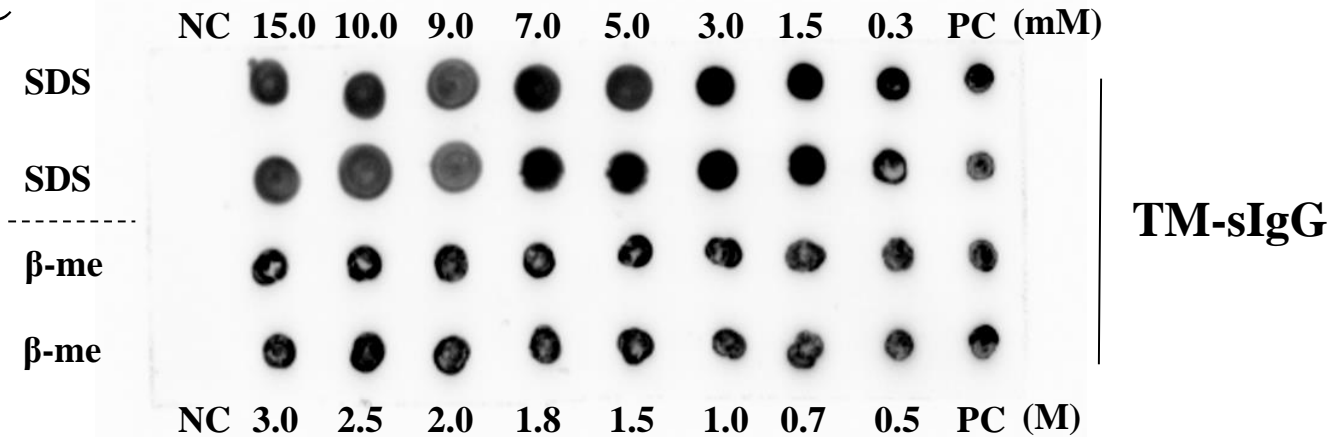

Supplement: Supplementary file 4 [file d24cc8097b63ce3b29647a7f.pdf]

**A**  
**(kDa) M HDHpro BSA**

**180**  
**130**  
**95**  
**72**  
**55**  
**43**  
**34**  
**26**  
**17**  
**10**

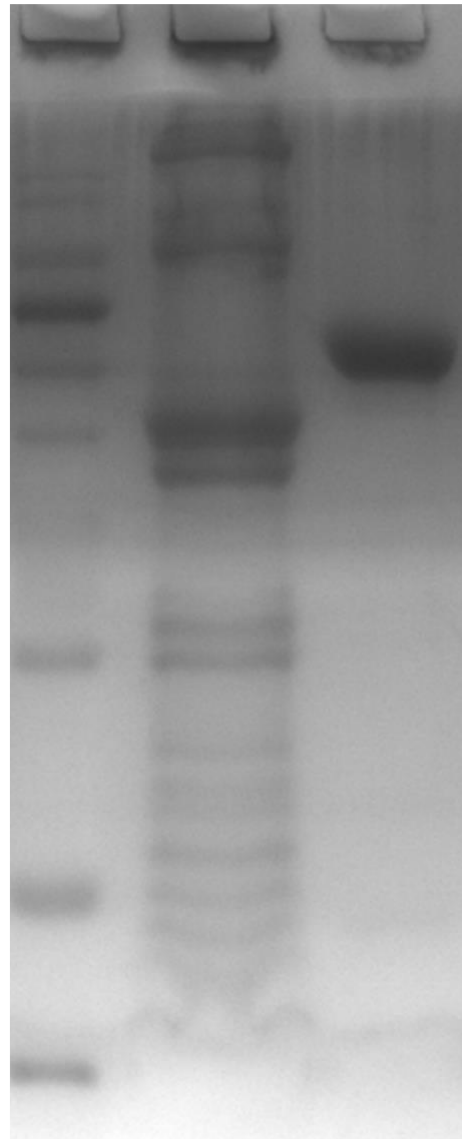

**B**  
(kDa) M HDHpro BSA

180 —  
130 —  
95 —  
72 —  
55 —  
43 —  
34 —  
26 —  
17 —  
10 —

—————  
sIgG-PM

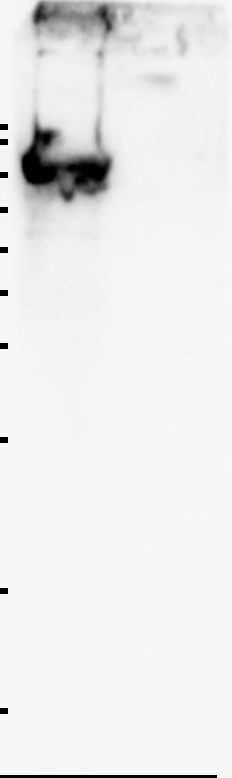

**C**

(kDa) M HDHpro BSA

180 —  
130 —  
95 —  
72 —  
55 —  
43 —  
34 —  
  
26 —  
  
17 —  
  
10 —

—————  
**sIgG-AK**

—————

**D**

(kDa) M HDHpro BSA

180 =

130 —

95 —

72 —

55 —

43 —

34 —

26 —

17 —

10 —

—————  
sIgG-TM

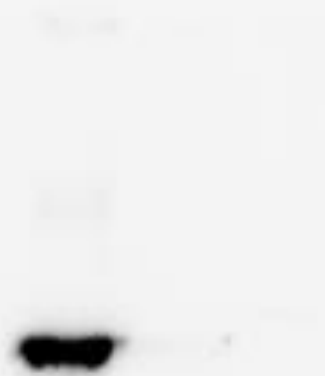

Supplement: Supplementary file 5 [file ebdb22a46b86e40fcc163429.pdf]
